# Supplementary material for: Responsiveness to PD-1 Blockade in End-Stage Colon Cancer with Gene Locus 9p24.1 Copy-Number Gain
Source: Oxford University Press journal article supplement (doi:10.1158/2326-6066.cir-18-0777), 2019-02-25
Supplement: 23266066cir180777-sup-211320_2_supp_5317780_pm99yd.xlsx [file 23266066cir180777-sup-211320_2_supp_5317780_pm99yd.xlsx]

## Sheet: Sheet1
Gene ID	Locus	Baseline FPKM	2-week FPKM
A2ML1	chr12:8975149-9029381	0.0337384	0
ABHD12B	chr14:51338877-51371688	4.30219	0
ABP1	chr7:150549572-150558379	21.2273	0
ACBD7	chr10:15117473-15130775	0.133774	0
ACER1	chr19:6306509-6333640	0.13826	0
ACTBL2	chr5:56775842-56778636	0.350709	0
ADAM21	chr14:70918873-70926622	0.147734	0
ADCYAP1R1	chr7:31092075-31151093	0.0193966	0
ADM2	chr22:50919984-50924866	0.173744	0
ADRA2C	chr4:3768295-3770253	0.34602	0
ADRB1	chr10:115803805-115806667	0.227797	0
AGR2	chr7:16832263-16844738	410.425	0
AGR3	chr7:16899029-16921613	9.25761	0
AK8	chr9:135600964-135754198	0.0637845	0
ALB	chr4:74269971-74287129	161.923	0
ALDH1A2	chr15:58245621-58358121	22.9414	0
ALDH3B2	chr11:67429632-67448685	0.026456	0
ALG1L2	chr3:129800673-129830276	0.240171	0
ALOX12	chr17:6888441-6915653	0.05628	0
ALOXE3	chr17:7999217-8022234	0.0998884	0
ALPP	chr2:233243347-233247599	0.181894	0
ALPPL2	chr2:233271551-233275424	0.899637	0
AMELX	chrX:11155662-11683821	0.68379	0
ANKRD18B	chr9:33524410-33573001	1.44849	0
ANKRD30B	chr18:14748238-14852737	0.0684775	0
ANKRD33	chr12:52281792-52285505	0.20821	0
ANKRD34A	chr1:145470507-145475647	0.0354973	0
ANO7	chr2:242127923-242164791	0.030815	0
ANP32C	chr4:164445449-165304407	0.12329	0
AP3B2	chr15:83211950-83378635	0.0172756	0
APCDD1L	chr20:57034425-57089949	0.187318	0
APLN	chrX:128779235-128788933	1.92366	0
APOBEC1	chr12:7801995-7818502	0.445889	0
APOBEC4	chr1:183605207-183897666	0.0705799	0
AQP6	chr12:50366619-50370922	0.0247233	0
AQPEP	chr5:115298150-115363299	0.0410492	0
ARC	chr8:143692409-143695833	0.198928	0
ARG2	chr14:68086578-68141602	10.0119	0
ART5	chr11:3659735-3663546	0.0583519	0
ARX	chrX:25021812-25034065	0.0453538	0
ASB14	chr3:57261764-57326710	0.04074	0
ASCL2	chr11:2289727-2292182	0.664413	0
ATCAY	chr19:3880617-3928080	0.0125049	0
ATG9B	chr7:150688143-150721586	0.0414729	0
ATP10B	chr5:159990126-160279219	30.4236	0
ATP2C2	chr16:84402132-84497793	6.56193	0
ATP6V1C2	chr2:10861774-10952960	1.80324	0
AVPR2	chrX:153167984-153172620	0.641703	0
AZU1	chr19:827830-832017	0.346459	0
B3GNT3	chr19:17905918-17924385	7.96771	0
B3GNT4	chr12:122688227-122692084	0.936	0
B4GALNT4	chr11:369794-382117	8.48833	0
BARX1	chr9:96713908-96717608	0.28568	0
BARX2	chr11:129245880-129322174	2.79817	0
BCMO1	chr16:81272295-81324747	0.272618	0
BDKRB1	chr14:96722546-96731100	0.611129	0
BDNF	chr11:27528398-27743605	0.101858	0
BEAN1	chr16:66461199-66527432	0.898347	0
BEND6	chr6:56819772-56892142	0.04857	0
BEST4	chr1:45249256-45253426	0.0320619	0
BMP7	chr20:55743808-55841707	0.0315985	0
BMPR1B	chr4:95679127-96079601	0.0116197	0
BOD1P	chr18:54814292-54817639	0.0192509	0
BPIFB2	chr20:31595406-31611515	0.107573	0
BPIFC	chr22:32809833-32853373	0.0683409	0
BRSK2	chr11:1411128-1483919	0.031077	0
BRWD1-IT2	chr21:40685860-40686888	0.222717	0
C10orf111	chr10:15137383-15146256	0.0804773	0
C10orf67	chr10:23605519-23633772	0.0221031	0
C10orf91	chr10:134258713-134261825	0.923949	0
C10orf95	chr10:104209573-104216050	0.0962148	0
C10orf99	chr10:85933553-85945050	18.8146	0
C11orf16	chr11:8932700-8954553	0.176351	0
C11orf20	chr11:64067862-64072239	0.456724	0
C12orf36	chr12:13523604-13529679	0.726689	0
C12orf54	chr12:48876285-48890297	0.0895753	0
C15orf27	chr15:76352298-76497304	0.0552229	0
C15orf37	chr15:80135888-80217196	0.129072	0
C16orf71	chr16:4746510-4799397	0.0484139	0
C16orf89	chr16:5094122-5116146	0.0904384	0
C17orf77	chr17:72576110-72590348	0.287151	0
C17orf82	chr17:59489111-59490641	0.0458739	0
C19orf29-AS1	chr19:3607244-3626813	0.0710393	0
C19orf35	chr19:2274630-2282181	0.0512112	0
C19orf45	chr19:7562444-7573336	0.494417	0
C19orf59	chr19:7741942-7744719	2.04244	0
C19orf73	chr19:49617617-49622397	0.228362	0
C19orf76	chr19:50191941-50194247	0.0317913	0
C1QTNF2	chr5:159774774-159797648	0.0276368	0
C1QTNF9B	chr13:24304327-24471125	0.230086	0
C1orf135	chr1:26160496-26185848	2.84231	0
C1orf61	chr1:156374054-156399184	0.181853	0
C1orf88	chr1:111889194-111895639	0.0848956	0
C20orf118	chr20:35504569-35580246	0.594508	0
C20orf195	chr20:62184372-62188035	0.336766	0
C20orf201	chr20:62711470-62731996	0.092461	0
C22orf24	chr22:32329506-32353590	0.175402	0
C2CD4A	chr15:62359175-62363116	0.0186666	0
C2CD4B	chr15:62455736-62457482	0.132966	0
C2CD4C	chr19:405442-409170	0.0207273	0
C2orf70	chr2:26785480-26802395	1.00692	0
C2orf77	chr2:170501934-170550931	0.0308634	0
C2orf82	chr2:233734993-233741107	0.968139	0
C3orf55	chr3:157261132-157319021	0.0749779	0
C4A,LOC100293534	chr6_ssto_hap7:3306068-3368931	40.0239	0
C4B	chr6_ssto_hap7:3282543-3303168	7.46665e-05	0
C4orf36	chr4:87797357-87813575	0.784039	0
C5orf52	chr5:157098560-157107162	0.125341	0
C6orf15	chr6_qbl_hap6:2374817-2376150	0.655228	0
C6orf222	chr6:36283534-36304662	1.28462	0
C6orf223	chr6:43968336-43973694	0.515281	0
C6orf58	chr6:127898318-127912960	0.122771	0
C7orf61	chr7:100054237-100061894	0.0765005	0
C9orf100	chr9:35658286-35665278	3.53456	0
C9orf71	chr9:71151497-71155783	0.0586952	0
C9orf96	chr9:136243283-136324508	0.0705524	0
CA1	chr8:86240457-86290342	0.0614541	0
CA4	chr17:58227301-58236906	0.0642652	0
CA6	chr1:9005921-9035148	0.107642	0
CA7	chr16:66878281-66888049	0.135351	0
CAGE1	chr6:7326886-7389942	0.0228734	0
CALB1	chr8:91070837-91095107	100.685	0
CALCA	chr11:14988214-14993832	0.324091	0
CAMK2N2	chr3:183967444-184010819	0.0526916	0
CAMKV	chr3:49895421-49907369	0.107175	0
CAPN13	chr2:30945637-31030311	0.171167	0
CAPN14	chr2:31395921-31440411	0.16715	0
CAPN9	chr1:230883129-230937749	0.0280825	0
CARD14	chr17:78152280-78182851	0.0651628	0
CASKIN1	chr16:2205798-2246465	0.0440033	0
CATSPER1	chr11:65784222-65793988	0.401335	0
CCDC103	chr17:42977153-42980629	2.08661	0
CCDC108	chr2:219866936-219906245	0.0105208	0
CCDC129	chr7:31556977-31693303	0.0252614	0
CCDC155	chr19:49891474-49921256	0.0556307	0
CCDC160	chrX:133371076-133379808	0.0556598	0
CCDC162P	chr6:109615505-109629423	0.241637	0
CCDC169	chr13:36742344-36871992	0.947131	0
CCDC169-SOHLH2	chr13:36742344-36871992	0.219545	0
CCDC42B	chr12:113587662-113623284	0.0464394	0
CCDC67	chr11:93063882-93171636	0.123011	0
CCDC85A	chr2:56411257-56613309	0.0320012	0
CCIN	chr9:36169388-36171331	0.0349026	0
CCL26	chr7:75398841-75419064	18.994	0
CCR9	chr3:45927995-45944667	0.0512765	0
CD164L2	chr1:27705595-27709805	0.0455618	0
CDC42EP5	chr19:54976209-54984422	1.82957	0
CDCA5	chr11:64844926-64851615	3.24364	0
CDH17	chr8:95139393-95229531	13.6232	0
CDK15	chr2:202671197-202758263	0.045839	0
CDSN	chr6_qbl_hap6:2378425-2403713	0.483834	0
CDX1	chr5:149546343-149564121	6.58557	0
CDX2	chr13:28536204-28543505	15.2172	0
CEACAM18	chr19:51979837-51986611	0.0614479	0
CEACAM3	chr19:42300533-42315591	0.967072	0
CEACAM4	chr19:42125343-42133442	0.182852	0
CEACAM6	chr19:42259397-42276113	186.941	0
CEACAM7	chr19:42177234-42192096	10.7875	0
CEBPE	chr14:23586514-23588820	0.0905758	0
CELA3A	chr1:22328148-22339035	1.39586	0
CELA3B	chr1:22303417-22315847	0.382989	0
CELF5	chr19:3224700-3297073	0.0409822	0
CEP170P1	chr4:119437494-119475359	0.494112	0
CERS1	chr19:18979360-19006953	0.031937	0
CERS3	chr15:100940599-101084925	0.0163878	0
CGB7	chr19:49557530-49558997	0.181579	0
CHAC1	chr15:41245635-41248717	6.14442	0
CHGB	chr20:5891973-5906005	0.12382	0
CHRM3	chr1:239792372-240072717	3.19371	0
CHRNA3	chr15:78857861-78913637	0.0332449	0
CHRNB2	chr1:154540256-154552353	0.0985936	0
CHRNB4	chr15:78916635-78933587	0.0481069	0
CHST5	chr16:75562427-75569068	0.218531	0
CHST6	chr16:75507021-75528926	0.0632648	0
CIDEC	chr3:9908393-9921938	0.0613544	0
CITED1	chrX:71521487-71527037	0.895322	0
CLCA4	chr1:87012758-87046432	17.8689	0
CLCNKA	chr1:16348485-16360545	0.0779931	0
CLEC18A	chr16:69984625-69997889	0.223244	0
CLK2P	chr7:23624334-23626146	0.528747	0
CNFN	chr19:42891170-42894444	0.193241	0
CNGA3	chr2:98962617-99015064	0.0505258	0
CNR1	chr6:88849584-88875767	0.0116862	0
COL17A1	chr10:105791045-105845638	4.12328	0
COL2A1	chr12:48366747-48398285	0.0129203	0
CPA2	chr7:129906702-129929637	0.0541594	0
CPA6	chr8:68334404-68658620	1.32124	0
CRABP1	chr15:78632665-78640572	0.542147	0
CRB1	chr1:197237333-197447585	0.0541284	0
CRB2	chr9:126118447-126141032	0.0222207	0
CRLF1	chr19:18704034-18717660	0.645285	0
CRYBB2	chr22:25615611-25627836	1.32257	0
CRYGN	chr7:151127055-151137099	0.237823	0
CSPG5	chr3:47603727-47621730	0.155184	0
CST4	chr20:23666276-23669662	0.115938	0
CST6	chr11:65779461-65780976	0.920494	0
CTAGE11P	chr13:75811888-75814517	0.0499589	0
CTF1	chr16:30907927-30914881	0.0416282	0
CTSL2	chr9:99791958-99801925	0.58723	0
CTXN2	chr15:48483866-48495951	0.194515	0
CXADRP2	chr15:22014419-22016878	0.403092	0
CXCL3	chr4:74902311-74904490	2.63769	0
CXorf58	chrX:23926122-23957624	0.0453911	0
CYP17A1	chr10:104590287-104597290	0.0364432	0
CYP19A1	chr15:51500253-51630795	0.115104	0
DCLK3	chr3:36753912-36781352	0.0822768	0
DDN	chr12:49388932-49393088	0.239184	0
DDX4	chr5:55033844-55112974	0.027858	0
DEFA3	chr8:6873390-6875823	1.09112	0
DEFB4A	chr8:7752198-7754237	4.42809	0
DGAT2L6	chrX:69397335-69425553	0.242403	0
DIO3	chr14:102027687-102029789	0.607238	0
DKK4	chr8:42231585-42234674	0.100142	0
DLK2	chr6:43395291-43423786	0.243053	0
DLX2	chr2:172964165-172967478	0.0288678	0
DLX4	chr17:48046561-48052323	0.0389617	0
DMP1	chr4:88571453-88585512	0.0248769	0
DMRT2	chr9:1050345-1057554	23.8984	0
DMRT3	chr9:976963-991732	0.0306282	0
DNAH17	chr17:76374734-76573476	0.0356986	0
DNAH3	chr16:20944475-21191937	0.228475	0
DND1	chr5:140044383-140053171	0.391133	0
DNER	chr2:230222344-230579286	0.157787	0
DNTT	chr10:98064084-98098321	0.132295	0
DPP6	chr7:153584418-154685995	0.0139652	0
DPY19L2P2	chr7:102815461-102920913	0.153031	0
DQX1	chr2:74745257-74753408	0.548412	0
DSTNP2	chr12:6993845-6994950	0.0678079	0
DUOXA1	chr15:45406522-45422057	12.9398	0
DUOXA2	chr15:45406522-45422057	151.634	0
DUSP15	chr20:30448869-30458479	0.124524	0
DUSP5P	chr1:228780393-228882416	0.0267179	0
DUSP9	chrX:152907896-152916781	0.0557078	0
EBF2	chr8:25699245-25902640	0.064727	0
EBF3	chr10:131633495-131762091	0.0287293	0
EDDM3A	chr14:21214098-21216539	0.181853	0
ELANE	chr19:852290-856246	0.0851463	0
ELMOD1	chr11:107461816-107537505	0.153372	0
ELOVL3	chr10:103986142-103989344	0.0550498	0
EN1	chr2:119599746-119605759	0.0878005	0
ENTPD3	chr3:40428672-40494799	0.0467794	0
EPHA10	chr1:38181645-38230824	0.421175	0
EPHX3	chr19:15337729-15343858	0.155038	0
EPS8L3	chr1:110292701-110306644	38.3062	0
EREG	chr4:75230859-75254477	1.92625	0
ERN2	chr16:23690200-23724821	5.93183	0
ERVMER34-1	chr4:53609683-53617807	0.910152	0
ESM1	chr5:54273694-54281414	0.905144	0
ETV2	chr19:36132646-36135773	0.047426	0
EVPL	chr17:74002926-74023507	4.97626	0
EVPLL	chr17:18281078-18292960	0.101876	0
EVX1	chr7:27282163-27286192	0.146838	0
EXTL1	chr1:26348270-26362954	0.01587	0
EYA1	chr8:72109667-72274467	0.0165809	0
FABP6	chr5:159614373-159665729	0.333101	0
FAM131C	chr1:16384263-16400127	0.487091	0
FAM132A	chr1:1177825-1182102	0.145785	0
FAM150A	chr8:53446596-53478021	0.0631211	0
FAM153B	chr5:175511908-175543457	0.192474	0
FAM178B	chr2:97541618-97652301	0.273075	0
FAM25A	chr10:88780045-88784487	1.63553	0
FAM27A	chr9:45727028-45728283	0.990371	0
FAM27B	chr9:67792928-67794189	0.495185	0
FAM27C	chr9:44990235-44991492	0.123796	0
FAM3D	chr3:58619669-58652561	85.7824	0
FAM43B	chr1:20878931-20881513	0.0509514	0
FAM46B	chr1:27331510-27339333	0.111725	0
FAM55A	chr11:114392436-114430580	9.33716	0
FAM55B	chr11:114549199-114577652	2.2768	0
FAM55D	chr11:114441312-114466484	0.526114	0
FAM59B	chr2:26395959-26412532	0.0763929	0
FAM64A	chr17:6347734-6354385	3.21705	0
FAM83E	chr19:49103856-49116694	1.44395	0
FAM90A25P	chr8:12272029-12277095	0.264081	0
FATE1	chrX:150884507-150891664	0.282681	0
FAXC	chr6:99720792-99797531	0.0820985	0
FBXL16	chr16:742499-755825	0.0543503	0
FBXO43	chr8:101145587-101158099	0.448778	0
FDPSL2A	chr7:76090971-76135312	0.0379478	0
FER1L6	chr8:124864226-125132302	0.371867	0
FFAR2	chr19:35940616-35942669	0.295312	0
FGD5-AS1	chr3:14984285-15106816	0.109092	0
FGF18	chr5:170846666-170884630	0.136527	0
FGFBP1	chr4:15937192-15940363	0.686191	0
FIBCD1	chr9:133777824-133814455	2.32515	0
FKBP6	chr7:72742154-72772641	0.181561	0
FLJ22184	chr19:7933604-7939326	0.168167	0
FLJ39534	chr3:47205859-47388306	0.0518723	0
FMO1	chr1:171217662-171255113	0.0315583	0
FOXD3	chr1:63788729-63790797	0.130187	0
FOXD4L6	chr9:69199479-69202204	0.144142	0
FOXH1	chr8:145691737-145701718	0.0306437	0
FOXL1	chr16:86612114-86615304	0.263474	0
FOXN1	chr17:26850958-26865175	0.437306	0
FRMD1	chr6:168456463-168479839	0.192918	0
FRMD8P1	chrX:64770501-64772301	0.0761076	0
FSTL4	chr5:132532151-132948223	0.140008	0
FUNDC2P2	chr2:84517805-84519324	0.0462612	0
FUT2	chr19:49199227-49209191	11.933	0
FZD9	chr7:72848108-72850450	0.31187	0
GABRB2	chr5:160715435-160975130	0.00850885	0
GABRD	chr1:1950767-1962192	0.811216	0
GAD1	chr2:171673199-171717659	0.83362	0
GAL	chr11:68451982-68458643	80.8827	0
GALR2	chr17:74070891-74073573	0.0557113	0
GAP43	chr3:115342150-115440334	0.0807994	0
GATA1	chrX:48644981-48652717	0.0477265	0
GATSL1	chr7:74379082-74438803	0.0778845	0
GDF1	chr19:18979360-19006953	4.77765e-06	0
GDF10	chr10:48425787-48439138	0.0247945	0
GGN	chr19:38874991-38878668	0.124409	0
GGTLC2	chr22:22988781-22990368	0.0953876	0
GIF	chr11:59596745-59612974	0.0464752	0
GJA9	chr1:39328161-39347298	0.0285922	0
GJB3	chr1:35246789-35251967	18.4428	0
GJB4	chr1:35225341-35229325	1.63092	0
GJB5	chr1:35220720-35224112	0.396205	0
GLIS1	chr1:53971905-54199877	0.0231828	0
GLIS3-AS1	chr9:3824127-4300035	2.22854	0
GLP1R	chr6:39016556-39055520	0.0207344	0
GLYATL2	chr11:58601539-58611997	0.103751	0
GNRH2	chr20:3024267-3026391	0.327959	0
GP1BB	chr22:19701986-19712297	0.0922979	0
GPA33	chr1:167022081-167059868	18.8989	0
GPM6B	chrX:13789061-13956831	0.139421	0
GPR110	chr6:46967812-47010082	0.0842417	0
GPR115	chr6:47666288-47689757	0.368278	0
GPR27	chr3:71728439-71804328	1.12366	0
GPR3	chr1:27719151-27722317	0.1273	0
GPRC5D	chr12:13093708-13103318	0.51335	0
GRAMD2	chr15:72452146-72490136	0.0783807	0
GRID2IP	chr7:6536408-6591067	0.0818939	0
GRIN1	chr9:140033608-140064491	0.403682	0
GRIN2B	chr12:13714409-14133022	5.43251	0
GRIN3B	chr19:1000436-1021141	0.198403	0
GSTM2P1	chr6:111367621-111368757	0.524182	0
GUCY2C	chr12:14765567-14849519	3.67364	0
H2AFB1,H2AFB2	chrX:154689079-154689596	0.200301	0
H2AFB2	chrX:154689079-154689596	0.450025	0
HAS1	chr19:52216364-52227221	0.0322162	0
HBD	chr11:5254058-5255858	0.108041	0
HBG1	chr11:5269501-5271087	3.60446	0
HEPHL1	chr11:93754377-93847374	8.57597	0
HERC2P4	chr16:32162608-32163874	0.0637217	0
HERC2P7	chr15:23390721-23393943	0.0389388	0
HES2	chr1:6475293-6479979	0.0149046	0
HES4	chr1:934341-935552	1.35463	0
HES7	chr17:8023907-8027410	0.0830394	0
HHLA2	chr3:108021331-108097126	0.197301	0
HIST1H1T	chr6:26107639-26108364	0.355333	0
HMGA2	chr12:66151800-66360071	0.614421	0
HOXA10-HOXA9	chr7:27202056-27219880	0.795114	0
HOXA11	chr7:27220775-27224835	6.48016	0
HOXA13	chr7:27236498-27239725	14.4001	0
HOXA7	chr7:27179982-27196296	1.7758	0
HOXA9	chr7:27202056-27219880	5.05246	0
HOXB-AS3	chr17:46667822-46683774	8.80275	0
HOXB13	chr17:46802126-46806111	1.19695	0
HOXB5	chr17:46667822-46683774	3.94337	0
HOXB8	chr17:46689707-46692301	4.80117	0
HOXB9	chr17:46698518-46703835	4.99868	0
HOXD13	chr2:176957531-176960666	0.285533	0
HPCA	chr1:33352097-33366953	0.101309	0
HPDL	chr1:45792544-45794346	1.10217	0
HS6ST2	chrX:131760037-132095423	2.15077	0
HSD17B1	chr17:40703983-40707232	0.0598274	0
HSF2BP	chr21:44949071-45079374	0.286521	0
HSPB9	chr17:40274755-40275371	0.301461	0
HSPE1-MOB4	chr2:198351307-198418423	0.306998	0
HTR1B	chr6:78171947-78173120	0.251956	0
HTR1D	chr1:23518387-23521222	0.529335	0
HTR1F	chr3:88031725-88042919	0.0203494	0
HTR6	chr1:19991779-20006055	0.0681863	0
IBSP	chr4:88720701-88733601	0.30687	0
IDAS	chr5:54515424-54523143	0.0638521	0
IFIT1B	chr10:91137812-91144962	0.0343261	0
IFNE	chr9:21454266-21559697	0.239581	0
IGF2BP1	chr17:47074773-47133507	0.014094	0
IGFBPL1	chr9:38408990-38424444	2.26828	0
IGFL3	chr19:46623327-46627931	0.27036	0
IGLON5	chr19:51815101-51834102	0.0208998	0
IL17C	chr16:88705000-88706882	0.218149	0
IL17D	chr13:21277481-21297237	0.0366426	0
IL23R	chr1:67632168-67725650	0.0232006	0
IL24	chr1:207070787-207095378	0.0858048	0
IL29	chr19:39786964-39789312	0.094195	0
INA	chr10:105036919-105050108	0.0199916	0
INSL4	chr9:5231418-5233967	1.51108	0
ISX	chr22:35462129-35483380	6.68027	0
JPH4	chr14:23980968-24048009	0.0445109	0
KCNE1L	chrX:108866928-108868393	0.096523	0
KCNIP3	chr2:95963071-96051825	0.048124	0
KCNIP4	chr4:20730238-21950374	0.0982174	0
KCNK9	chr8:140624803-140715299	0.22182	0
KCNMB4	chr12:70760061-70828072	0.0133675	0
KCNS2	chr8:99439249-99443023	0.0204321	0
KCNV1	chr8:110979232-110986959	0.444343	0
KIAA1239	chr4:37246689-37451087	0.0166019	0
KIAA1751	chr1:1884751-1935276	0.0536483	0
KIR2DL1	chr19:55281264-55295778	0.0436165	0
KISS1	chr1:204159468-204165619	0.121061	0
KISS1R	chr19:917341-921015	1.41176	0
KLHDC8A	chr1:205305647-205326039	0.105562	0
KLHL35	chr11:75133437-75141674	0.245028	0
KLHL38	chr8:124657914-124665190	0.18627	0
KLK1	chr19:51322403-51327043	2.65691	0
KLK11	chr19:51525486-51531290	8.37798	0
KLK6	chr19:51461886-51472929	8.09918	0
KLK8	chr19:51499263-51504958	0.806053	0
KREMEN2	chr16:3014216-3018384	0.171039	0
KRT13	chr17:39657232-39661865	0.522754	0
KRT15	chr17:39669996-39675270	0.482514	0
KRT16	chr17:39766030-39769079	1.52601	0
KRT16P3	chr17:20404826-20407811	0.0693235	0
KRT18P55	chr17:26603011-26634408	0.41714	0
KRT2	chr12:53038341-53045959	0.082269	0
KRT33B	chr17:39519745-39526047	0.0434906	0
KRT34	chr17:39533920-39538636	0.241593	0
KRT37	chr17:39576808-39580822	0.160526	0
KRT6A	chr12:52880957-52887181	7.9864	0
KRT75	chr12:52817853-52828110	0.0947245	0
KRT79	chr12:53215230-53228077	0.0325819	0
KRT84	chr12:52771595-52779417	0.0973772	0
KRTAP1-5	chr17:39182278-39183454	0.0627923	0
KRTAP5-8	chr11:71249070-71250253	0.311688	0
KTN1-AS1	chr14:56042874-56046810	0.325578	0
LAMB4	chr7:107663995-107770801	0.10683	0
LANCL3	chrX:37430821-37536750	1.02369	0
LCN15	chr9:139654085-139658965	2.0979	0
LDHAL6A	chr11:18477373-18501147	0.0339769	0
LDLRAD1	chr1:54474505-54483803	0.105951	0
LEFTY2	chr1:226124297-226129083	0.870484	0
LEMD1	chr1:205342379-205391214	0.125602	0
LGALS7B	chr19:39279849-39282394	0.441626	0
LGALS9B	chr17:20353175-20370848	1.81955	0
LHFPL1	chrX:111873878-111923375	0.0778274	0
LILRP2	chr19:55219600-55224887	0.0237719	0
LINC00087	chrX:134229014-134232733	0.0232543	0
LINC00152	chr2:87754973-87821030	0.215299	0
LINC00256A	chr9:115875175-115882126	0.0215802	0
LINC00336	chr6:33551475-33561115	0.0637508	0
LINC00471	chr2:232373136-232379050	0.395833	0
LIPT2	chr11:74202922-74204755	0.648205	0
LOC100127888	chr20:61273796-61303647	0.049941	0
LOC100128023	chr3:193675160-193721448	0.0648879	0
LOC100128573	chr19:7537722-7538247	0.390232	0
LOC100129480	chr3:12581279-12586963	2.01401	0
LOC100129636	chr6_ssto_hap7:344879-385401	0.071255	0
LOC100129845	chr7:100183955-100205798	0.0259585	0
LOC100130275	chr6:10396915-10419797	0.720252	0
LOC100130357	chr6:12717036-13295818	0.057708	0
LOC100130855	chr15:63796709-63894620	0.0400249	0
LOC100130950	chr17:5095378-5138931	0.0797321	0
LOC100131257	chr7:7115400-7136417	0.00289758	0
LOC100134259	chr2:47055002-47086145	0.0606441	0
LOC100268168	chr5:172381785-172386371	0.160754	0
LOC100287177	chr19:46112657-46148775	0.170293	0
LOC100287225	chr18:48918411-49088839	0.0202809	0
LOC100288181	chr8:143781528-143808391	0.011023	0
LOC100288637	chr15:30938317-31065209	0.011283	0
LOC100288748	chr8:95649512-95651695	0.0306437	0
LOC100288846	chr14:39734475-39820397	0.0527377	0
LOC100289092	chr16:28889808-28936532	1.35269	0
LOC100294145	chr6_ssto_hap7:4292680-4302272	0.0178528	0
LOC100499227	chr11:119252487-119369944	0.384771	0
LOC100505761	chr10:104209573-104216050	0.0876139	0
LOC100505854	chr7:77313167-77409120	0.0342093	0
LOC100506710	chr9:37079892-37090398	0.0144924	0
LOC100507003	chr19:49929687-49932075	0.0449501	0
LOC100507547	chr6_ssto_hap7:3468303-3493616	0.0716765	0
LOC100507588	chr19:7981031-7983980	0.0579615	0
LOC100859930	chr5:180256953-180262726	0.0415995	0
LOC143666	chr11:573807-575885	0.0323719	0
LOC158376	chr9:35909479-35911617	0.317254	0
LOC255411	chr12:49121217-49159569	0.168879	0
LOC284023	chr17:7816639-7819265	0.182732	0
LOC285033	chr2:96850602-96908362	0.563475	0
LOC338651	chr11:1490684-1785501	0.32359	0
LOC338739	chr11:33183202-33213142	0.0326879	0
LOC388152	chr15:84860599-84898920	0.0191958	0
LOC388553	chr19:46242887-46262748	0.126374	0
LOC389458	chr7:5085451-5112854	0.332192	0
LOC389791	chr9:130890807-130892913	0.0956768	0
LOC400643	chr18:6925472-6929868	0.0392687	0
LOC401093	chr3:151980404-152183569	0.00936785	0
LOC439990	chr10:81967465-81979413	0.0309904	0
LOC440356	chr16:29875003-29879374	0.57013	0
LOC440461	chr17:66194800-66196443	0.0422409	0
LOC494127	chr9:89698800-89700140	0.0536293	0
LOC494141	chr11:18230684-18235111	0.159777	0
LOC643802	chr16:53403273-53405041	0.106878	0
LOC644172	chr17_ctg5_hap1:1188438-1190693	0.118073	0
LOC645431	chr14:65877309-66210839	0.199922	0
LOC646627	chr1:248902716-248903151	5.49982	0
LOC646999	chr7:39649085-39651687	0.0252621	0
LOC648809	chr15:84748938-84795353	0.0633866	0
LOC648987	chr5:43014830-43018913	0.0310055	0
LOC654342	chr2:91824708-91847975	0.309987	0
LOC728739	chr12:108296926-108297548	0.148502	0
LOC728819	chr2:43864438-43995126	0.189562	0
LOC728875	chr1:144300511-144341755	0.217553	0
LOC729176	chr6:146920135-147136597	0.155351	0
LOC729264	chr16:32264649-32267243	0.100214	0
LOC729862	chr5:28926976-28927420	0.264212	0
LOC84931	chr2:121221910-121223925	0.0335056	0
LOC84989	chr10:64926987-65226322	0.323503	0
LPAR3	chr1:85279085-85358896	2.68345	0
LPPR4	chr1:99729847-99775138	0.150496	0
LRRC14B	chr5:191625-195468	0.0888402	0
LRRC26	chr9:140033608-140064491	0.123147	0
LRRC73	chr6:43474706-43478424	0.158206	0
LRRIQ4	chr3:169539709-169555560	0.337372	0
LUZP2	chr11:24518515-25104186	0.0121592	0
LY6H	chr8:144239330-144242053	0.170034	0
LY6K	chr8:143781528-143808391	0.0403464	0
MAGEA11	chrX:148769902-148798928	0.180686	0
MATN1	chr1:31184123-31199593	0.016678	0
MC3R	chr20:54823787-54824871	0.0694487	0
MCM3AP-AS1	chr21:47649157-47705236	0.0574604	0
MIOX	chr22:50925212-50928750	0.394947	0
MMP13	chr11:102813720-102826463	0.144487	0
MNX1	chr7:156797546-156803347	0.472261	0
MPP4	chr2:202509596-202563417	0.0537696	0
MPPED2	chr11:30406039-30607930	0.165441	0
MS4A2	chr11:59856136-59865940	0.0526875	0
MSI1	chr12:120779132-120806958	0.0661394	0
MSLN	chr16:810764-818865	43.877	0
MSMB	chr10:51549552-51562518	0.346919	0
MSX1	chr4:4861391-4865660	0.24517	0
MSX2	chr5:174151574-174157902	0.574923	0
MT3	chr16:56623266-56625000	4.44783	0
MTNR1A	chr4:187454808-187476537	13.426	0
MUC17	chr7:100663363-100702140	11.872	0
MUC2	chr11:1074874-1104417	26.2973	0
MUC4	chr3:195473637-195538844	10.2027	0
MYH16	chr7:98870923-98895594	0.0881658	0
MYOC	chr1:171604556-171621773	0.065912	0
MYT1	chr20:62795826-62873606	0.0339953	0
NANOS1	chr10:120789227-120793854	0.0273289	0
NANOS3	chr19:13988062-13991571	0.293121	0
NBPF7	chr1:120377387-120387779	0.0360724	0
NCAN	chr19:19322781-19363061	0.00973722	0
NDNF	chr4:121956781-121993673	0.476753	0
NEK5	chr13:52638899-52703214	0.872579	0
NETO1	chr18:70409548-70534810	0.0563062	0
NKAIN1	chr1:31652591-31712734	0.155922	0
NKAIN4	chr20:61872135-61892967	0.248265	0
NKAPP1	chrX:119370308-119379122	0.0273484	0
NKPD1	chr19:45653007-45663408	0.0134811	0
NLGN4Y	chrY:16634487-16955848	0.0247869	0
NMU	chr4:56461397-56502465	1.10524	0
NOV	chr8:120428551-120436678	0.404364	0
NOX1	chrX:100098312-100129334	11.9361	0
NOX5	chr15:69116302-69564544	0.0481385	0
NOXO1	chr16:2028917-2031440	2.30993	0
NPB	chr17:79860071-79869340	0.300709	0
NPPB	chr1:11917520-11918992	0.375243	0
NPTX1	chr17:78440632-78450404	0.2078	0
NTF4	chr19:49564396-49567124	0.0769891	0
NUDT9P1	chr10:92911760-92912837	0.21004	0
NXPH4	chr12:57610577-57620232	0.303664	0
OIP5-AS1	chr15:41576200-41591795	0.0359219	0
OMP	chr11:76777991-76837198	0.436835	0
OPRD1	chr1:29138653-29190208	0.154756	0
OR10H1	chr19:15917816-15918936	0.733509	0
OR10H2	chr19:15838833-15839862	0.148295	0
OR10H5	chr19:15904858-15905806	0.0823541	0
OR1F1	chr16:3254246-3255185	0.0833795	0
OR2B6	chr6:27925018-27925960	0.249105	0
OR2L8	chr1:248100492-248264224	0.0833795	0
OR2T33	chr1:248436153-248437116	0.2421	0
OR2T8	chr1:248084319-248085258	0.0833795	0
OR2W3	chr1:248058888-248059833	1.32309	0
OR4C11	chr11:55370829-55371874	0.0727164	0
OR51E2	chr11:4701400-4719076	0.164238	0
OR52B2	chr11:6190584-6191556	0.159478	0
OR7D2	chr19:9296269-9299493	0.0200382	0
OR7E24	chr19:9361719-9362739	0.0749779	0
OR7E37P	chr13:42016699-42017902	0.244297	0
OR9A2	chr7:142723286-142724219	0.168155	0
OSR2	chr8:99956630-99964326	1.98505	0
OTX1	chr2:63277191-63284966	0.616451	0
OVOL1	chr11:65554504-65564690	3.88802	0
OXCT2	chr1:40204516-40254533	0.224915	0
OXGR1	chr13:97637972-97646604	1.25272	0
PADI1	chr1:17531620-17572501	1.49399	0
PADI3	chr1:17575592-17610727	0.283933	0
PAK3	chrX:110187512-110464173	0.0908784	0
PAK6	chr15:40453209-40569688	2.34429	0
PAX9	chr14:37126772-37147011	0.0417127	0
PCDH10	chr4:134070469-134112732	0.0117036	0
PCNA-AS1	chr20:5095598-5107268	0.357001	0
PCSK1	chr5:95726039-95768985	0.117721	0
PCSK1N	chrX:48689505-48693960	0.238902	0
PDX1	chr13:28494167-28500451	1.73896	0
PF4V1	chr4:74719012-74720198	0.114834	0
PFN4	chr2:24338243-24346151	0.323542	0
PGLYRP4	chr1:153302596-153321022	0.111831	0
PGPEP1L	chr15:99511458-99551024	1.17449	0
PHGR1	chr15:40643233-40648634	128.146	0
PI3	chr20:43803539-43805185	213.343	0
PIP	chr7:142829173-142836834	0.502441	0
PITX1	chr5:134363423-134369964	26.6471	0
PITX2	chr4:111538579-111563279	0.713465	0
PIWIL1	chr12:130822432-130856877	0.256887	0
PIWIL3	chr22:25115000-25170687	0.0369141	0
PKP3	chr11:394216-404908	17.5038	0
PLA2G10	chr16:14766404-14788526	1.62091	0
PLA2G4D	chr15:42359880-42386752	0.0357925	0
PLA2G4E	chr15:42273779-42342901	0.0264185	0
PLA2G4F	chr15:42433331-42448839	0.386375	0
PLAC1	chrX:133699872-133792513	0.794915	0
PLD5	chr1:242251688-242687998	0.0228281	0
PNCK	chrX:152935187-152939816	0.046726	0
PNMT	chr17:37824506-37826728	0.256241	0
PNPLA1	chr6:36210944-36276372	0.0280807	0
POM121L10P	chr22:25028881-25055114	0.0129189	0
POM121L2	chr6:27276841-27280011	0.040809	0
POM121L4P	chr22:21043842-21046009	0.0308951	0
POM121L8P	chr22:21636713-21652015	0.00804071	0
POPDC3	chr6:105585561-105627858	0.890454	0
POTEF	chr2:130831107-130886795	0.0146261	0
POU5F1P3	chr12:8276227-8291203	0.0694487	0
PPAPDC3	chr9:134165080-134184649	0.096237	0
PPP1R14C	chr6:150464187-150571528	3.9882	0
PPP1R14D	chr15:41107642-41120907	1.31756	0
PPP1R1B	chr17:37783176-37792878	59.3404	0
PRAC	chr17:46799081-46799882	95.1571	0
PRAME	chr22:22890122-22901696	0.505461	0
PRDM13	chr6:100054649-100063454	0.0201723	0
PRKCDBP	chr11:6340175-6341740	0.513976	0
PRKG2	chr4:82009836-82126215	0.0193685	0
PRM1	chr16:11374692-11375192	0.934815	0
PROK2	chr3:71820805-71834357	0.0903622	0
PRR15	chr7:29603426-29606911	1.03074	0
PRR19	chr19:42801184-42814973	0.963351	0
PRRT1	chr6_ssto_hap7:3463864-3467445	0.0717582	0
PRRX2	chr9:132427919-132484951	0.220602	0
PRSS2	chr7:142478756-142482399	0.313203	0
PRSS27	chr16:2762422-2770552	0.338644	0
PRSS41	chr16:2848485-2855133	0.162707	0
PSCA	chr8:143751725-143764145	3.43616	0
PSPN	chr19:6375304-6375860	0.472718	0
PTCHD2	chr1:11539294-11597640	0.0361787	0
PTGER3	chr1:71318035-71546972	0.114215	0
PTPN5	chr11:18749474-18813389	0.0426908	0
PTPRN	chr2:220154344-220174295	0.107245	0
PTPRR	chr12:71031852-71314584	28.874	0
RAB3B	chr1:52373627-52456436	0.0429565	0
RAET1E	chr6:150139893-150244214	0.488254	0
RAET1G	chr6:150139893-150244214	0.405934	0
RAET1L	chr6:150341265-150346668	0.72014	0
RASL10A	chr22:29708921-29711748	0.141608	0
RASL12	chr15:65337707-65360388	0.127594	0
RASSF10	chr11:13030969-13033653	1.95382	0
RCOR2	chr11:63678692-63684316	2.01928	0
REEP2	chr5:137774775-137782658	0.160054	0
REG4	chr1:120336640-120354203	0.10697	0
REN	chr1:204123943-204135465	0.627399	0
RETN	chr19:7733971-7735340	0.238129	0
RFPL2	chr22:32586421-32600718	0.0487493	0
RFPL3-AS1	chr22:32750871-32767063	0.134104	0
RGS17	chr6:153332031-153452389	0.578674	0
RGS9BP	chr19:33166312-33169206	0.0675225	0
RHCG	chr15:90014637-90039799	0.0350243	0
RNASE3	chr14:21359561-21360507	0.241154	0
RNASE7	chr14:21510384-21512392	0.0470191	0
RNF183	chr9:116059372-116061320	0.181932	0
RNF186	chr1:20140521-20141771	6.12127	0
RNF223	chr1:1007125-1009687	0.199606	0
RNF39	chr6_ssto_hap7:1365371-1374068	0.756033	0
ROCK1P1	chr18:109064-122222	0.32233	0
ROPN1B	chr3:125688027-125702296	0.153782	0
RPSAP52	chr12:66151800-66360071	0.0650279	0
RSPH10B	chr7:5965776-6010314	0.271133	0
RTL1	chr14:101346991-101351184	0.0303114	0
RXFP4	chr1:155911479-155912625	0.0648181	0
S100A2	chr1:153533584-153538306	0.242425	0
S100A3	chr1:153519808-153521734	0.230987	0
S100P	chr4:6695565-6698897	41.6277	0
SAMD13	chr1:84764048-84816481	0.847817	0
SAPCD2	chr9:139956578-139965028	0.466597	0
SBF1P1	chr8:56015016-56438710	0.0102003	0
SCEL	chr13:78109808-78219398	0.340423	0
SCNN1G	chr16:23194039-23228200	0.0367192	0
SCT	chr11:626312-627173	0.202313	0
SCUBE3	chr6:35182189-35218609	0.196852	0
SCXA	chr8:145321516-145323045	0.154596	0
SCXB	chr8:145486055-145515120	0.154596	0
SDR16C5	chr8:57212569-57233241	0.277765	0
SEMG1	chr20:43835637-43838414	0.458227	0
SEMG2	chr20:43850009-43853099	0.170659	0
SEPT14	chr7:55861236-55930482	0.0337766	0
SERINC4	chr15:44038589-44094769	0.0473143	0
SERP2	chr13:44947977-44971850	1.06138	0
SERPINB2	chr18:61554938-61571124	0.0356224	0
SERPINB3	chr18:61322430-61329197	0.154458	0
SERPINB4	chr18:61304492-61311502	0.0401048	0
SERPINB5	chr18:61144143-61172318	11.6212	0
SERTAD4	chr1:210404803-210416440	0.10091	0
SFTPA2	chr10:81315607-81320163	0.0910975	0
SGCG	chr13:23755059-23899304	0.0837773	0
SGK110	chr19:56052022-56056909	0.0572458	0
SHC4	chr15:49115933-49255641	0.027776	0
SHISA2	chr13:26618734-26625198	0.360794	0
SHISA3	chr4:42399855-42404504	0.24042	0
SHISA6	chr17:11144739-11467380	0.092283	0
SHOX2	chr3:157813799-157823952	0.0207745	0
SI	chr3:164696685-164796283	2.205	0
SIGLEC15	chr18:43405544-43422521	0.140291	0
SIM2	chr21:38071990-38122510	17.3037	0
SIX1	chr14:61111416-61116155	0.219538	0
SIX3	chr2:45169036-45173216	1.33249	0
SLC10A4	chr4:48485359-48491541	0.0633821	0
SLC10A6	chr4:87744620-87770416	0.32811	0
SLC12A1	chr15:48498497-48596275	0.0134151	0
SLC22A31	chr16:89262168-89266529	0.183324	0
SLC25A41	chr19:6426047-6433790	0.0451522	0
SLC25A48	chr5:135170364-135224326	0.0613229	0
SLC25A5-AS1	chrX:118599995-118605359	0.0209871	0
SLC27A6	chr5:128301209-128369335	0.0753417	0
SLC30A3	chr2:27477439-27485960	0.0642263	0
SLC35D3	chr6:137243401-137246776	14.464	0
SLC35F1	chr6:118228688-118638839	0.0130013	0
SLC35G6	chr17:7362684-7387568	0.0615734	0
SLC36A2	chr5:150694538-150727151	0.0188064	0
SLC5A2	chr16:31494438-31519706	0.0586058	0
SLC6A14	chrX:115567746-115592625	0.0831747	0
SLC7A4	chr22:21383006-21386847	0.316183	0
SLC9A2	chr2:103236165-103327809	7.32372	0
SMC1B	chr22:45739944-45809500	0.0746706	0
SMPX	chrX:21724089-21776278	0.25153	0
SNHG6	chr8:67782983-67837777	0.235439	0
SNHG8	chr4:119199916-119200978	0.23916	0
SNX32	chr11:65601409-65621172	0.121446	0
SOHLH2	chr13:36742344-36871992	0.146591	0
SOX1	chr13:112721912-112726020	0.0154867	0
SOX30	chr5:157052686-157079428	0.0943263	0
SP6	chr17:45922279-45933240	0.353762	0
SP8	chr7:20821893-20826508	0.0705519	0
SPC24	chr19:11257830-11266484	4.1295	0
SPDEF	chr6:34505578-34524110	0.03652	0
SPDYA	chr2:29033699-29093175	0.243065	0
SPINK2	chr4:57676033-57687893	0.160781	0
SPRED3	chr19:38880938-38886871	0.18898	0
SPRN	chr10:135207620-135238121	0.0407676	0
SPRNP1	chr10:135367403-135383462	0.0277897	0
SPRR1B	chr1:153003678-153005376	0.299216	0
SPRR2A	chr1:153028595-153029988	0.653902	0
SPRR2D	chr1:153012200-153013594	3.75193	0
SPRR2E	chr1:153065610-153067001	0.782983	0
SPRR3	chr1:152974222-152976332	0.878767	0
SRMS	chr20:62172162-62178857	0.556415	0
SRPK3	chrX:153046455-153051187	2.36065	0
SSTR3	chr22:37602244-37608353	0.0316079	0
SSTR5	chr16:1114081-1131454	0.0987342	0
ST7-AS1	chr7:116592500-116870075	0.0721016	0
STOML3	chr13:39540061-39564996	0.0354917	0
STX19	chr3:93698982-93774522	0.0641285	0
SULT1C3	chr2:108863650-108881807	0.431214	0
SULT2B1	chr19:49055428-49102684	1.59277	0
SYCE2	chr19:13001973-13030086	0.168155	0
SYCE3	chr22:50989540-51001328	0.799604	0
SYCP2L	chr6:10887063-10974541	0.062075	0
SYCP3	chr12:102091416-102133250	0.201329	0
SYT3	chr19:51125233-51143092	0.0266221	0
TAC3	chr12:57403780-57410344	0.42454	0
TARM1	chr19:54573200-54584634	0.0885228	0
TBC1D3C	chr17:34581084-34592032	0.0317411	0
TBX4	chr17:59533806-59561664	0.0534833	0
TBX6	chr16:30097114-30103205	0.190029	0
TCN1	chr11:59620280-59634041	0.936965	0
TCP11	chr6:35085848-35109187	0.49263	0
TDRD1	chr10:115939028-115992063	0.0140368	0
TDRD12	chr19:33210678-33281714	0.215125	0
TDRD5	chr1:179560747-179660407	0.435248	0
TEKT2	chr1:36549675-36553876	0.046619	0
TEX29	chr13:111973014-111996594	0.122289	0
TFAP2A	chr6:10396915-10419797	1.58172	0
TFF1	chr21:43782390-43786644	12.4498	0
TFF2	chr21:43766466-43771208	0.122788	0
TGM3	chr20:2276612-2321725	0.195938	0
TGM5	chr15:43524792-43559055	0.0472562	0
TGM6	chr20:2361553-2413399	0.310378	0
TH	chr11:2185158-2193035	0.715338	0
THEGL	chr4:57396774-57469489	0.144669	0
TINAG	chr6:54173202-54254950	0.0379579	0
TKTL1	chrX:153524026-153558713	0.0254978	0
TM4SF20	chr2:228226873-228244022	0.0290067	0
TMC1	chr9:75136716-75451267	0.0403851	0
TMEM125	chr1:43735664-43739673	2.49556	0
TMEM145	chr19:42817476-42829214	0.694172	0
TMEM151A	chr11:66059372-66064135	0.0260482	0
TMEM155	chr4:122680084-122687963	0.0287028	0
TMEM211	chr22:25331207-25335314	1.24305	0
TMEM31	chrX:102962271-102983552	0.350511	0
TMEM61	chr1:55446464-55457966	0.889509	0
TMIE	chr3:46742822-46752413	0.293141	0
TMSB15B	chrX:103139054-103401708	0.401935	0
TNNI3	chr19:55663135-55669100	20.3523	0
TOMM20L	chr14:58862643-59015549	0.459079	0
TPRXL	chr3:13978806-14107481	0.324382	0
TPSD1	chr16:1306272-1308494	0.0943425	0
TRAM1L1	chr4:118004709-118006736	0.199702	0
TRIM29	chr11:119981993-120008863	6.79518	0
TRIM40	chr6_ssto_hap7:1434969-1446965	0.0708723	0
TRIM54	chr2:27505296-27531130	0.070166	0
TRPM5	chr11:2425745-2444275	0.0162377	0
TRY6	chr7:142478756-142482399	4.78243e-07	0
TTLL9	chr20:30458504-30530858	0.0866685	0
TUBA4B	chr2:220110191-220136910	1.5018	0
TUBAL3	chr10:5435060-5446793	0.0762039	0
TYRP1	chr9:12693385-12710266	0.0453197	0
UBQLN3	chr11:5528529-5531153	0.0283118	0
ULBP1	chr6:150285142-150294846	0.0411995	0
USP26	chrX:132159506-132162300	0.0701419	0
VAX1	chr10:118888031-118897812	0.137618	0
VCX	chrX:7810302-7812184	0.561891	0
VCX3A	chrX:6451658-6453159	0.232154	0
VCX3B	chrX:8432870-8434551	0.691435	0
VGF	chr7:100805789-100808852	0.0773756	0
VSIG8	chr1:159796478-159832447	0.112879	0
VSTM5	chr11:93553734-93583668	0.311589	0
VWA2	chr10:115999017-116049751	12.2096	0
VWA3B	chr2:98703594-98929410	0.0665128	0
VWA5B1	chr1:20617411-20681387	0.0283043	0
VWA5B2	chr3:183948316-183967313	0.0316899	0
VWC2	chr7:49813256-49952138	0.107959	0
WBP11P1	chr18:30091625-30094597	0.043741	0
WFDC12	chr20:43752066-43753106	0.108041	0
WISP3	chr6:112375277-112390887	0.176767	0
WNT6	chr2:219724545-219738954	0.0812366	0
WNT7A	chr3:13860081-13921618	0.402387	0
WSCD2	chr12:108523510-108644313	0.0136397	0
ZCCHC5	chrX:77911565-77914825	0.0495686	0
ZEB2-AS1	chr2:145141941-145278466	1.63233e-158	0
ZIC2	chr13:100634025-100639019	0.0655401	0
ZNF114	chr19:48774653-48790863	0.0302895	0
ZNF474	chr5:121465214-121489266	0.0692438	0
ZNF488	chr10:48355088-48373866	0.0735056	0
ZNF556	chr19:2867332-2878501	0.0851382	0
ZNF560	chr19:9577030-9609279	0.0466166	0
ZNF670-ZNF695	chr1:247108848-247242115	0.267846	0
ZNF860	chr3:31702316-32033228	0.181429	0
ZSCAN12P1	chr6:28058928-28063493	0.0172459	0
ABCC6P2	chr16:14916288-14918559	0	1.92178
ABCG4	chr11:119019749-119033374	0	0.0921727
ACCN1	chr17:31340105-32483825	0	0.404844
ACCN4	chr2:220378891-220403494	0	0.0238077
ACTN3	chr11:66314390-66330797	0	0.616246
ADAD2	chr16:84224722-84230772	0	0.0339902
ADAM29	chr4:175839508-175899331	0	0.0214143
ADAM30	chr1:120436155-120439147	0	0.0450968
ADAMTS18	chr16:77316024-77469011	0	0.0659023
ADARB2	chr10:1223252-1779670	0	0.022863
ADCY2	chr5:7396342-7830194	0	0.0296224
ADCY8	chr8:131792546-132052835	0	0.273852
ADIPOQ	chr3:186560462-186576252	0	0.114761
AFP	chr4:74301932-74321492	0	1.31023
AGBL1	chr15:86685241-87572283	0	0.0572978
AGBL3	chr7:134671258-134820530	0	0.16982
AGBL4	chr1:48998526-50489626	0	0.112905
AGXT2	chr5:34998205-35048240	0	19.0673
AJAP1	chr1:4715104-4843851	0	0.236405
AKR1B10	chr7:134212343-134226166	0	1.86087
ALLC	chr2:3705785-3750260	0	0.102026
AMHR2	chr12:53817638-53825318	0	0.456259
AMPD1	chr1:115215719-115238239	0	0.862277
AMY2A	chr1:104159998-104168400	0	0.0442317
ANKK1	chr11:113258512-113271140	0	0.134512
ANKRD1	chr10:92671856-92681032	0	0.534276
ANKRD20A2,ANKRD20A3	chr9:43089971-43133544	0	0.379888
ANKRD20A3	chr9:67926760-67970293	0	8.65232e-06
ANKRD20A8P	chr2:95421070-95522820	0	0.0543601
ANKRD34B	chr5:79852573-79866304	0	0.0673131
ANKRD36BP2	chr2:89065418-89106109	0	5.33613
ANKS1B	chr12:99039077-100378432	0	0.530661
ANO3	chr11:26353677-26684836	0	0.0546977
ANP32A-IT1	chr15:69070874-69113261	0	0.0204211
ANXA13	chr8:124693033-124749647	0	3.13854
ANXA8,ANXA8L1	chr10:48255224-48271368	0	0.000141027
ANXA8L1	chr10:48255224-48271368	0	0.288081
APOBEC2	chr6:41020939-41032630	0	0.0441692
APOL5	chr22:36113918-36125529	0	0.153917
AQP4	chr18:24432007-24765302	0	0.408168
AQP8	chr16:25228284-25240253	0	0.172129
ARID3C	chr9:34621454-34628011	0	1.59258
ARL9	chr4:57371374-57390058	0	0.404717
ARMC12	chr6:35704858-35716685	0	0.460322
ARMC3	chr10:23216953-23326514	0	0.0241501
ARMC4	chr10:28101096-28287977	0	0.186495
ARPP21	chr3:35683848-35835988	0	0.186222
ASAH2B	chr10:52499707-52514569	0	0.453013
ASB11	chrX:15299830-15333746	0	0.0496671
ASB12	chrX:63444071-63450511	0	0.407237
ASB4	chr7:95115212-95169543	0	0.279087
ASCL1	chr12:103351451-103354294	0	0.220822
ASIP	chr20:32848170-32857148	0	0.683166
ASMT	chrY:1660485-1711974	0	0.153838
ASPDH	chr19:51014856-51017947	0	1.13563
ASTN1	chr1:176830202-177134024	0	0.0682308
ATP13A4	chr3:193119865-193272696	0	0.370125
ATP1A2	chr1:160085519-160113374	0	0.465648
ATP1A4	chr1:160121351-160156767	0	1.29919
ATP6V1G3	chr1:198492351-198510075	0	0.150987
AZGP1P1	chr7:99578384-99581860	0	2.208
B3GALT2	chr1:193091087-193223942	0	0.0375677
BCL2L10	chr15:52401821-52404972	0	0.280407
BEND4	chr4:42112869-42154895	0	0.202907
BEX1	chrX:102317580-102319168	0	0.194192
BFSP2	chr3:133118789-133194056	0	0.13326
BLID	chr11:121959810-122073770	0	0.970961
BLK	chr8:11351520-11422108	0	0.342802
BMP10	chr2:69092612-69098649	0	0.595214
BMP3	chr4:81952118-81978685	0	0.0340204
BMP5	chr6:55620237-55740375	0	1.2817
BMP6	chr6:7727010-8102828	0	0.888302
BNIPL	chr1:151009028-151020076	0	0.0644124
BTN1A1	chr6:26501494-26510652	0	0.0237558
BTNL3	chr5:180415844-180433727	0	0.0281493
BTNL9	chr5:180467224-180488523	0	0.381171
C10orf114	chr10:21783420-21786213	0	0.953552
C10orf62	chr10:99344101-99372555	0	0.671808
C10orf71	chr10:50507186-50535537	0	0.19748
C11orf91	chr11:33719653-33722286	0	0.27386
C11orf92	chr11:111164113-111179353	0	0.0236895
C11orf95	chr11:63527363-63536113	0	0.0699688
C12orf40	chr12:40019971-40115720	0	0.121454
C12orf42	chr12:103695732-103889749	0	0.0565419
C12orf69	chr12:14956505-14976791	0	0.298472
C15orf2	chr15:24920540-24928593	0	0.039919
C15orf26	chr15:81426643-81441516	0	0.737428
C15orf53	chr15:38988798-38992239	0	0.0342719
C16orf96	chr16:4606490-4650318	0	0.52645
C17orf108	chr17:26205339-26220409	0	0.39615
C17orf109	chr17:73584138-73663269	0	0.0454147
C17orf66	chr17:34181959-34195895	0	0.535801
C19orf18	chr19:58469804-58485902	0	0.0897157
C19orf71	chr19:3538262-3557571	0	0.690058
C1QTNF9	chr13:24883715-24896669	0	0.311169
C1orf129	chr1:170904611-171033906	0	0.0306749
C1orf168	chr1:57184476-57285369	0	5.86528
C1orf173	chr1:75033794-75139422	0	0.225302
C1orf186	chr1:206238871-206288647	0	0.216116
C1orf98	chr1:200311671-200342920	0	0.0521614
C20orf152	chr20:34556528-34618622	0	0.766178
C20orf197	chr20:58630979-58648008	0	0.398082
C20orf202	chr20:1184097-1188918	0	0.0451251
C21orf37	chr21:18811207-18821503	0	0.501183
C21orf62	chr21:34144410-34186053	0	0.016686
C21orf67	chr21:46353198-46359828	0	0.0387276
C22orf26	chr22:46446338-46454402	0	0.0386558
C22orf45	chr22:24823529-24890783	0	1.62359
C2orf16	chr2:27799388-27805589	0	0.899132
C2orf40	chr2:106682112-106694609	0	0.443449
C2orf61	chr2:47314129-47382517	0	0.929138
C2orf62	chr2:219221578-219232817	0	0.622574
C2orf65	chr2:74785009-74875164	0	0.403536
C2orf73	chr2:54558070-54588714	0	0.0367267
C2orf78	chr2:74011315-74044274	0	0.110629
C2orf84	chr2:24397971-24414567	0	0.120587
C2orf88	chr2:191002485-191068210	0	0.568015
C3orf35	chr3:37440967-37476988	0	0.403742
C3orf36	chr3:133646989-133648656	0	0.172654
C3orf74	chr3:52096109-52099128	0	0.0669932
C4orf44	chr4:3250766-3258342	0	0.30152
C5orf27	chr5:95187935-95195836	0	0.663027
C8orf22	chr8:49966894-49988642	0	0.0595536
C8orf46	chr8:67405490-67430759	0	0.134848
C8orf84	chr8:73976777-74005507	0	0.0174722
C9orf11	chr9:27284653-27297137	0	0.171082
C9orf139	chr9:139901685-139931234	0	0.121728
CA14	chr1:150230217-150237480	0	0.328533
CA5A	chr16:87921624-87970112	0	9.89317
CACNA1E	chr1:181452685-181775921	0	0.0383285
CACNA1G	chr17:48633567-48704832	0	0.0168755
CACNA1S	chr1:201008639-201081694	0	0.231286
CACNA2D3	chr3:54156692-55108584	0	0.379971
CACNB4	chr2:152689285-152955593	0	0.0247725
CACNG1	chr17:65040651-65052911	0	0.11371
CADM2	chr3:85008132-86123579	0	0.00713872
CADM3	chr1:159141376-159172932	0	0.411884
CALCR	chr7:93053798-93204042	0	0.387252
CALML6	chr1:1846265-1848733	0	0.070823
CALY	chr10:135138927-135150475	0	0.0817436
CAMP	chr3:48264836-48266981	0	0.830494
CAPZA3	chr12:18891044-18892122	0	0.945315
CARD17	chr11:104896236-104972158	0	1.76283
CASP12	chr11:104756444-104769397	0	0.382781
CASQ1	chr1:160160284-160171676	0	0.575134
CASQ2	chr1:116242625-116311426	0	0.100803
CASR	chr3:121902529-122005344	0	0.266341
CCDC153	chr11:119060962-119066584	0	0.911119
CCDC154	chr16:1484388-1494490	0	0.158507
CCDC158	chr4:77234191-77328458	0	1.11959
CCDC38	chr12:96260825-96336428	0	0.180143
CCDC78	chr16:771157-776473	0	0.0897968
CCL17	chr16:57438678-57449974	0	1.25973
CCL27	chr9:34661892-34662689	0	1.64268
CCR10	chr17:40831419-40833845	0	0.0609545
CCR3	chr3:46283871-46308197	0	0.0417142
CCR6	chr6:167525294-167552629	0	0.146044
CD160	chr1:145695797-145715565	0	0.186556
CD19	chr16:28943259-28950668	0	0.82793
CD1A	chr1:158223926-158228058	0	0.0333226
CD1B	chr1:158297739-158301321	0	0.159273
CD1C	chr1:158259562-158264564	0	0.65868
CD1E	chr1:158323485-158327343	0	0.14086
CD207	chr2:71057342-71062953	0	0.0378146
CD300LG	chr17:41924515-41940997	0	0.404966
CDH16	chr16:66942024-66952887	0	0.143285
CDH19	chr18:64171320-64271216	0	0.611372
CDH8	chr16:61685914-62070739	0	0.0396398
CERKL	chr2:182321618-182521834	0	0.0235719
CES1P1	chr16:55794510-55808826	0	0.339092
CES5A	chr16:55880065-55989943	0	0.767438
CG030	chr13:33006929-33112936	0	0.0133886
CH25H	chr10:90965693-90967071	0	0.161744
CHI3L2	chr1:111770280-111786062	0	0.149861
CHRDL1	chrX:109917083-110039286	0	0.453384
CHRNA1	chr2:175612322-175629200	0	0.709531
CHRNA2	chr8:27317277-27336813	0	0.0162512
CHST9	chr18:24432007-24765302	0	8.13295
CIB3	chr19:16272178-16284286	0	0.141125
CIDEA	chr18:12254317-12277594	0	0.150325
CIDECP	chr3:10059236-10067820	0	0.106884
CLCN1	chr7:143013218-143049097	0	0.065269
CLDN19	chr1:43198763-43205925	0	0.165786
CLDN9	chr16:3062456-3064506	0	0.034141
CLEC12B	chr12:10163230-10171399	0	0.530998
CLEC17A	chr19:14693895-14721956	0	0.306928
CLEC18C	chr16:70207927-70220798	0	0.214198
CLEC19A	chr16:19297104-19322269	0	0.329778
CLEC1A	chr12:10223079-10251605	0	0.400671
CLEC1B	chr12:10145661-10151899	0	9.72928
CLEC4C	chr12:7882010-7902069	0	0.74181
CLEC4F	chr2:71035776-71047732	0	0.721173
CLEC4M	chr19:7828034-7834491	0	6.61159
CLEC9A	chr12:10183275-10218565	0	0.0859711
CNDP1	chr18:72201691-72252261	0	11.5617
CNGA4	chr11:6260321-6265707	0	0.221662
CNNM1	chr10:101088855-101154087	0	0.0108957
CNR2	chr1:24200459-24239817	0	0.04017
CNTFR	chr9:34551429-34590138	0	0.658328
CNTN1	chr12:41086243-41466213	0	0.0356863
CNTN2	chr1:205012339-205047171	0	0.0587588
CNTN6	chr3:1134628-1445278	0	0.0566578
CNTNAP2	chr7:145813452-148118088	0	0.16812
COL19A1	chr6:70576447-70922157	0	0.485308
COL25A1	chr4:109731876-110223799	0	0.0274779
COL28A1	chr7:7398243-7575460	0	0.0569155
COL4A6	chrX:107398836-107682704	0	0.0295288
COL9A1	chr6:70925742-71012786	0	0.0883457
COX6A2	chr16:31439051-31439749	0	0.562239
CPA5	chr7:129984629-130008571	0	0.15162
CPB1	chr3:148545587-148577972	0	0.151068
CPNE9	chr3:9745509-9771592	0	0.0341596
CPO	chr2:207804277-207834198	0	0.18932
CPS1-IT1	chr2:211342405-211543831	0	0.02997
CRIP3	chr6:43265997-43276530	0	0.338933
CRLF2	chrY:1264886-1281530	0	0.792898
CRYAA	chr21:44589140-44592913	0	4.67631
CSDC2	chr22:41957013-41972670	0	0.0270537
CSMD3	chr8:113235158-114449242	0	0.0554943
CSRP3	chr11:19203577-19223589	0	0.352657
CTAGE7P	chr10:131862161-131909081	0	0.0958236
CTNND2	chr5:10971951-11904110	0	0.731252
CTRL	chr16:67927174-67965778	0	0.973106
CTSG	chr14:25042723-25045466	0	1.06287
CXCR5	chr11:118754474-118781613	0	0.187949
CXXC11	chr2:242811885-242815482	0	0.118756
CXorf31	chrX:46746853-46759139	0	0.206933
CXorf69	chrX:134124967-134126503	0	0.0949056
CYP11A1	chr15:74630102-74660081	0	3.10288
CYP1A1	chr15:75011882-75017877	0	0.6281
CYP2A13	chr19:41594355-41602100	0	0.405607
CYP3A43	chr7:99425635-99464173	0	6.23088
CYP46A1	chr14:100150754-100193638	0	0.437387
CYP4F24P	chr19:15870143-15890798	0	0.0833231
CYTL1	chr4:5016313-5021197	0	0.719705
DAB1	chr1:57463578-58716211	0	0.609064
DCC	chr18:49866541-51062273	0	0.0438225
DCDC1	chr11:31284170-31391357	0	0.0820793
DCDC5	chr11:30885149-31014233	0	1.23974
DCST1	chr1:155006281-155042029	0	0.0624218
DCT	chr13:95091840-95131936	0	0.180418
DDX43	chr6:74104284-74127289	0	0.0504831
DHH	chr12:49483205-49488602	0	0.109346
DIRAS2	chr9:93372113-93405108	0	0.144757
DKFZp779M0652	chr11:45792982-45793909	0	2.32083
DLG2	chr11:83166055-85338314	0	0.363764
DLGAP2	chr8:1449568-1656642	0	0.126665
DNAH8	chr6:38683116-38998574	0	0.255924
DNAI1	chr9:34458810-34520982	0	0.108638
DNM1P46	chr15:100330360-100347132	0	0.190439
DNMBP-AS1	chr10:101635333-101769676	0	0.0771251
DNMT3L	chr21:45666222-45682099	0	0.126182
DPEP3	chr16:68009565-68014452	0	0.0411885
DPP10	chr2:115199898-116602326	0	0.0271093
DPPA4	chr3:109044987-109056419	0	0.0240665
DRD1	chr5:174867674-174871163	0	0.059477
DSG1	chr18:28898051-28937393	0	8.88985
DUSP27	chr1:167064086-167098402	0	0.0491752
DYDC2	chr10:82116557-82127829	0	0.077026
DYNLRB2	chr16:80574853-80584541	0	2.01556
ECRP	chr14:21387499-21388335	0	0.484595
EDA2R	chrX:65815481-65859140	0	0.0584751
EEF1DP3	chr13:32420919-32533721	0	0.175093
EFCAB5	chr17:27952964-28435470	0	0.0532021
EFHC2	chrX:44007127-44202923	0	0.0206163
EGFEM1P	chr3:167967309-168548374	0	0.0517803
ELF5	chr11:34500341-34535347	0	0.0595359
ELFN2	chr22:37763999-37823505	0	0.00768183
ELK2AP	chr14:106135913-106139144	0	0.217863
EMBP1	chr1:121260909-121313686	0	0.935226
ENDOU	chr12:48103517-48119355	0	0.0609523
ENHO	chr9:34521039-34523037	0	2.25421
EPHA6	chr3:96533424-97467786	0	0.1085
EPHA7	chr6:93949739-94129300	0	0.0486866
ERBB4	chr2:212240441-213403352	0	0.0321827
ERC2	chr3:55542335-56502391	0	0.095193
ERVFRD-1	chr6:11094265-11138969	0	0.0202689
ESRRB	chr14:76837689-76968180	0	0.022371
ESRRG	chr1:216676587-217311097	0	0.0767458
EYS	chr6:64429875-66417118	0	0.0361895
FADS6	chr17:72873472-72889705	0	0.102311
FAM106A	chr17:18427879-18430160	0	0.576053
FAM110B	chr8:58907112-59062277	0	0.557685
FAM151A	chr1:55013806-55100417	0	1.24169
FAM163A	chr1:179712297-179785333	0	0.0929752
FAM163B	chr9:136443536-136445368	0	0.136993
FAM169B	chr15:98980390-99057611	0	0.0406168
FAM180A	chr7:135414345-135433594	0	0.513634
FAM183B	chr7:38724945-38726689	0	0.087535
FAM194A	chr3:150377674-150421742	0	0.0340852
FAM209A	chr20:55043646-55101208	0	0.815476
FAM209B	chr20:55108301-55111576	0	0.919427
FAM22F	chr9:97080477-97090926	0	0.160175
FAM48B1	chrX:24380877-24383541	0	0.102287
FAM5B	chr1:177140632-177251558	0	0.0374552
FAM65C	chr20:49202646-49253426	0	0.461859
FAM71D	chr14:67656109-67695267	0	0.318294
FAM86FP	chr12:8383644-8395542	0	0.389901
FAM9B	chrX:8993036-9001116	0	0.074007
FBN3	chr19:8130286-8212385	0	0.028599
FBXL21	chr5:135266005-135277367	0	0.119057
FBXW12	chr3:48413708-48436190	0	0.100385
FCRL1	chr1:157764193-157789940	0	0.326118
FCRL4	chr1:157543538-157567870	0	0.115798
FCRLA	chr1:161676761-161684142	0	0.0365985
FDCSP	chr4:71091787-71100968	0	1.6212
FGF12	chr3:191857181-192445388	0	0.024104
FGF14	chr13:102373204-103054124	0	0.62498
FGF16	chrX:76709646-76712013	0	4.16418
FITM1	chr14:24600674-24602058	0	0.159323
FLJ22447	chr14:62037257-62121431	0	0.16315
FLJ22763	chr3:108855560-108868951	0	0.255288
FLJ30403	chr19:52095035-52097633	0	0.253044
FLJ31306	chr14:58711522-58764855	0	0.055739
FLJ33360	chr5:6310553-6337405	0	0.198925
FLJ38109	chr5:153570294-153825382	0	0.0193534
FLJ39739	chr1:147906021-147931980	0	0.0737943
FLJ40194	chr17:47325604-47336027	0	0.620267
FLJ41200	chr9:13406378-13431328	0	0.118573
FLJ42280	chr7:96110937-96132835	0	0.228929
FLJ42875	chr1:2976180-2984289	0	0.466526
FLJ45079	chr17:75875082-75880169	0	0.209156
FNDC5	chr1:33327868-33338082	0	1.69849
FNDC7	chr1:109255555-109285367	0	0.0660268
FOLR3	chr11:71846770-71850934	0	0.498638
FOXD4L1	chr2:114256660-114258727	0	0.0338271
FOXN4	chr12:109715782-109747025	0	0.139709
FREM1	chr9:14734663-14910993	0	0.221866
FREM2	chr13:39261172-39461267	0	0.168705
FSD2	chr15:83428023-83474806	0	0.0274936
FSHR	chr2:49189295-49381666	0	0.0734141
GABRA5	chr15:27111865-27194357	0	0.270237
GABRB3	chr15:26788693-27018935	0	0.258463
GABRG3	chr15:27216428-27778373	0	0.490282
GALNTL6	chr4:172734574-173961558	0	0.0475477
GALR3	chr22:38219388-38221502	0	0.199801
GATA5	chr20:61038552-61051026	0	0.26314
GCFC1-AS1	chr21:34100424-34144169	0	0.0375677
GCK	chr7:44183869-44229022	0	0.141127
GDF2	chr10:48413091-48416853	0	2.43921
GDF7	chr2:20866423-20871250	0	1.12695
GDNF	chr5:37812778-37839782	0	0.236582
GDPD4	chr11:76927602-76998463	0	0.351242
GFI1B	chr9:135854097-135867084	0	0.0435799
GHRL	chr3:10327433-10335133	0	0.434827
GLOD5	chrX:48620153-48632064	0	0.12047
GLRA3	chr4:175563197-175750465	0	0.0185237
GLTPD2	chr17:4692253-4693884	0	4.8586
GLYATL3	chr6:49467670-49495777	0	0.130851
GMNC	chr3:190570525-190580465	0	1.26717
GNRHR2	chr1:145507556-145516076	0	0.0207162
GOLGA6B	chr15:72947037-72959738	0	11.4956
GOLGA6C	chr15:75550898-75565796	0	0.666607
GOLGA6D	chr15:75575181-75588148	0	0.0387187
GOLGA8IP	chr15:23255241-23262743	0	3.16262
GP9	chr3:128779644-128781253	0	1.07473
GPR1	chr2:207040041-207082771	0	0.20889
GPR112	chrX:135383121-135499047	0	0.0450812
GPR113	chr2:26531040-26618759	0	0.124188
GPR123	chr10:134901408-134945179	0	0.0153877
GPR156	chr3:119884327-119963142	0	0.01576
GPR179	chr17:36481492-36499693	0	0.0483533
GPR25	chr1:200842165-200843251	0	0.936605
GPR37	chr7:124386113-124405681	0	0.75333
GPR55	chr2:231772042-231789941	0	0.017327
GPR88	chr1:101003727-101007583	0	0.0577919
GRAPL	chr17:19030781-19062148	0	0.333957
GRB14	chr2:165349322-165478360	0	14.4762
GREM2	chr1:240652872-240775462	0	0.173534
GRK7	chr3:141497042-141535892	0	0.286526
GRM5	chr11:88237743-88796816	0	0.221142
GSTA5	chr6:52696540-52710893	0	0.199774
GUCA1B	chr6:42151021-42162694	0	1.00588
GUCA2B	chr1:42619091-42621495	0	0.329877
GUCY2E	chr11:76391209-76432833	0	0.0969373
GUSBP3	chr5:68935289-69006272	0	0.0999874
H2BFXP	chrX:103139054-103401708	0	0.51169
HCAR1	chr12:123212152-123215129	0	0.0680129
HCG4	chr6_ssto_hap7:1096479-1103140	0	1.19952
HCN4	chr15:73612199-73661605	0	0.0892337
HCP5	chr6_ssto_hap7:2761726-2764356	0	0.538976
HIGD1B	chr17:42925278-42976993	0	0.766118
HIPK4	chr19:40885177-40896094	0	0.0279981
HLA-DPB2	chr6_ssto_hap7:4560770-4577055	0	1.17172
HMGCLL1	chr6:55299170-55444012	0	0.0555169
HMSD	chr18:61616587-61627645	0	0.1536
HORMAD2	chr22:30476452-30573062	0	0.634032
HOXC8	chr12:54402889-54406545	0	0.0604321
HOXD4	chr2:177016112-177017949	0	0.11603
HRASLS	chr3:192958917-192988644	0	0.370473
HRC	chr19:49654455-49658681	0	0.231016
HRH3	chr20:60790016-60795323	0	0.0508111
HRH4	chr18:22040592-22059921	0	0.0392596
HSD3B1	chr1:120049825-120057681	0	0.171119
HSD3BP4	chr1:120106502-120115199	0	0.00737743
HSF5	chr17:56497528-56565759	0	0.144757
HTA	chr16:73126247-73127672	0	0.0727165
HTR7	chr10:92500575-92617671	0	0.165148
HTR7P1	chr12:13153375-13157764	0	0.0149967
HYAL4	chr7:123485222-123517531	0	0.0571734
IAPP	chr12:21417533-21548371	0	0.0355779
ICAM4	chr19:10397642-10399260	0	0.238921
IGFN1	chr1:201159952-201198080	0	0.496458
IGLL1	chr22:23915312-23922495	0	0.331406
IGLL3P	chr22:25714223-25716193	0	1.77846
IGSF1	chrX:130407482-130423403	0	0.014401
IGSF21	chr1:18434239-18704977	0	0.289899
IGSF23	chr19:45116939-45140081	0	3.89317
IHH	chr2:219919141-219925238	0	0.506038
IL1RAPL2	chrX:103810995-105011822	0	0.0678163
IL2	chr4:123372625-123377650	0	0.107805
IL21	chr4:123533782-123542212	0	1.41009
IL26	chr12:68595128-68619571	0	0.30174
INSL3	chr19:17927321-17932320	0	1.43185
INSM1	chr20:20348764-20351592	0	0.0239651
IP6K3	chr6:33689442-33714762	0	0.101043
IQUB	chr7:123092235-123174718	0	0.215986
ITGB1BP3	chr19:3933100-3942414	0	0.206621
ITLN2	chr1:160914815-160924589	0	0.0671005
IYD	chr6:150690027-150725765	0	2.67157
IZUMO1	chr19:49244144-49250166	0	0.267471
JSRP1	chr19:2252249-2256422	0	0.809548
KANSL1-AS1	chr17_ctg5_hap1:563497-760700	0	2.67246
KBTBD11	chr8:1922043-1955109	0	0.0288749
KCNA2	chr1:111136201-111174096	0	0.246251
KCNA5	chr12:5153084-5155949	0	0.259932
KCNA6	chr12:4918341-4960278	0	0.152037
KCNA7	chr19:49570674-49576198	0	0.0150581
KCNB1	chr20:47988504-48099181	0	0.0530389
KCNH6	chr17:61600694-61626338	0	0.178775
KCNH7	chr2:163227916-163695257	0	0.093267
KCNIP1	chr5:169780880-170163636	0	0.729499
KCNIP2	chr10:103578824-103603677	0	0.215266
KCNJ13	chr2:233562014-233725289	0	0.0396333
KCNJ16	chr17:68071425-68131746	0	0.641538
KCNJ3	chr2:155555092-155713014	0	0.210682
KCNJ6	chr21:38996785-39288696	0	0.0276028
KCNK12	chr2:47747914-47797470	0	0.0518587
KCNN1	chr19:18062110-18109930	0	0.0256451
KCNQ5	chr6:73331570-73908573	0	0.0414648
KCNT1	chr9:138594030-138684993	0	0.206214
KIAA0125	chr14:106383837-106398502	0	0.0732397
KIAA0664L3	chr16:31711933-31718745	0	0.0802884
KIAA1045	chr9:34958191-34982541	0	0.0333375
KIAA1210	chrX:118212597-118284542	0	0.0164483
KIF1A	chr2:241653180-241759725	0	0.107824
KIF25	chr6:168418552-168445769	0	0.145223
KIF6	chr6:39302875-39693181	0	0.0666497
KIR3DL2	chr19:55361897-55378670	0	0.464432
KIRREL2	chr19:36347809-36358048	0	0.0499169
KLF17	chr1:44584521-44600809	0	0.064484
KLHL31	chr6:53512698-53530506	0	0.237755
KLHL33	chr14:20896969-20903801	0	0.304171
KLHL34	chrX:21673608-21676448	0	0.0477108
KLRF1	chr12:9980076-9997603	0	0.366799
KLRF2	chr12:10034087-10048432	0	0.121878
KRT222	chr17:38811871-38821416	0	2.8448
KRTAP10-3	chr21:45917774-46131495	0	0.721429
KRTAP5-6	chr11:1490684-1785501	0	0.546695
KRTAP5-7	chr11:71238312-71239210	0	0.551746
KY	chr3:134318764-134369864	0	0.0342064
LBX2	chr2:74724643-74734821	0	0.101365
LCN10	chr9:139632618-139637411	0	0.0347671
LDB3	chr10:88428205-88495824	0	1.33703
LDLRAD2	chr1:22138757-22263750	0	0.0329736
LEKR1	chr3:156544095-156763918	0	0.0726421
LGALS12	chr11:63014620-63330855	0	0.126073
LGALS2	chr22:37966252-37976024	0	5.04005
LGI1	chr10:95517565-95557916	0	1.54331
LHX6	chr9:124964855-124991091	0	0.0609458
LHX9	chr1:197881634-197899273	0	0.0336257
LINC00115	chr1:761585-762902	0	1.08123
LINC00176	chr20:62665696-62671315	0	0.0872712
LINC00261	chr20:22541191-22559280	0	0.0133287
LINC00266-1	chr20:62921737-62934707	0	0.123808
LINC00477	chr12:24719897-24737102	0	0.0419197
LINC00478	chr21:17442841-17982094	0	0.0817644
LINC00574	chr6:170188885-170202969	0	1.03892
LOC100009676	chr3:101368282-101398057	0	0.048752
LOC100128071	chr1:32826870-32827844	0	0.259964
LOC100128164	chr3:169661771-169684522	0	0.0215215
LOC100128398	chr19:58488440-58518574	0	0.0745032
LOC100128822	chr7:152161208-152162630	0	0.0519449
LOC100129138	chr1:104615644-104619693	0	0.37864
LOC100129387	chr15:50569388-50650503	0	0.0319545
LOC100129722	chr9:140144670-140147949	0	0.0421741
LOC100129726	chr2:43454349-43455994	0	0.0876576
LOC100129794	chr14:37147125-37642998	0	0.0807027
LOC100129917	chr4:773936-775636	0	0.0422025
LOC100130231	chr8:126934766-126963441	0	0.142623
LOC100130705	chr7:128506463-128512101	0	0.0348957
LOC100130890	chr6:99968869-99981059	0	0.183096
LOC100130894	chr16:70721341-70835061	0	0.124534
LOC100131047	chr6:38683116-38998574	0	0.0327984
LOC100131060	chr1:59250822-59365384	0	0.0805802
LOC100131094	chr19:4675243-4723855	0	0.0219241
LOC100131096	chr17:76000317-76107880	0	0.336968
LOC100131434	chrX:148609131-148621312	0	0.352711
LOC100131564	chr1:93775665-93811368	0	0.016396
LOC100132356	chr5:43065288-43067073	0	0.159655
LOC100132526	chr3:13974552-13978444	0	0.0396011
LOC100134713	chr7:140395135-140406446	0	0.0437369
LOC100134868	chr20:25990434-26002430	0	0.0468136
LOC100286793	chr1:143718512-143744587	0	3.29157e-05
LOC100287216	chr2:109743783-110262207	0	0.0486005
LOC100288069	chr1:700244-714068	0	0.108484
LOC100288974	chr10:81664653-81691557	0	0.104213
LOC100302401	chr1:178060642-178448648	0	0.0295035
LOC100302650	chr2:28004265-28561767	0	0.0868062
LOC100335030	chr12:49760687-49921207	0	0.148826
LOC100499405	chr12:9392598-9395645	0	0.111147
LOC100505676	chr8:67331821-67341212	0	0.0150726
LOC100505746	chr21:46305867-46349595	0	0.0306754
LOC100506012	chr19:46984044-47104457	0	0.427932
LOC100506334	chr21:35303515-35343487	0	0.0532552
LOC100506472	chr22:39795758-39833133	0	0.0747315
LOC100506540	chr11:18621350-18656020	0	0.513058
LOC100506801	chr1:21543739-21672034	0	0.106194
LOC100507034	chr10:3179918-3215033	0	0.0324266
LOC100507055	chr12:133179735-133187037	0	0.0953207
LOC100507178	chr1:41480261-41707815	0	0.177471
LOC100507389	chr3:142645516-142661378	0	0.077744
LOC100507424	chr12:2945981-2986321	0	0.189774
LOC100507433,ZNF540	chr19:38039850-38105079	0	0.0280107
LOC100507567	chr19:8439259-8469317	0	0.0777797
LOC100507582	chr3:4939913-4948186	0	0.729024
LOC100616668	chr13:41363546-41495910	0	0.0150944
LOC100652846	chr12:2162415-2807115	0	0.186522
LOC147646	chr19:51891542-51893828	0	0.0568549
LOC151174	chr2:239133753-239140318	0	0.298706
LOC158434	chr9:98868942-98878693	0	0.102371
LOC200772	chr2:241894035-241906868	0	0.0913542
LOC254100	chr11:65336690-65337884	0	0.320382
LOC255167	chr5:6582286-6588613	0	0.0224528
LOC283050	chr10:80703082-80827205	0	0.0650455
LOC283392	chr12:72647286-73059422	0	0.0425211
LOC283440	chr12:2870365-2880835	0	0.177075
LOC283710	chr15:31514970-31523050	0	0.153649
LOC284009	chr17:2310274-2318730	0	0.174604
LOC285456	chr4:109459345-109541613	0	0.0351902
LOC286437	chrX:103139054-103401708	0	0.0297845
LOC374443	chr12:9800642-9811008	0	0.0261271
LOC388387	chr17:41026690-41050751	0	0.0384656
LOC389634	chr12:8509559-8543348	0	0.423376
LOC390940	chr19:44080951-44086256	0	1.75093
LOC399715	chr10:6319649-6377937	0	0.284216
LOC399815	chr10:124591670-124658230	0	0.0330235
LOC401321	chr7:32797897-32802536	0	0.0141487
LOC439994	chr10:88998423-89103331	0	0.0661078
LOC440297	chr15:83130032-83182930	0	0.0094935
LOC440300	chr15:84860599-84898920	0	0.00830496
LOC550113	chr4:68918915-68995587	0	0.0243475
LOC606724	chr16:30194730-30200575	0	0.177075
LOC619207	chr10:135267431-135281953	0	0.347064
LOC642236	chr9:68427782-68454375	0	0.219939
LOC643037	chr11:94245694-94265289	0	0.16195
LOC643401	chr5:27472398-27496508	0	0.0704243
LOC643733	chr11:104772275-104788902	0	0.157071
LOC644649	chr16:59788044-59789095	0	0.0750728
LOC646498	chr3:49215068-49229291	0	0.129177
LOC648740	chr1:104068577-104122149	0	0.0708735
LOC650226	chr7:56491396-56516068	0	0.0431635
LOC653712	chr3:128580350-128590384	0	0.21175
LOC728392	chr17:5402746-5404319	0	0.245264
LOC728558	chr10:97471535-97849992	0	0.0618705
LOC728989	chr1:146490894-146514599	0	2.55101
LONRF2	chr2:100889752-100939195	0	0.0456798
LPAR4	chrX:78003205-78012578	0	0.0260727
LPPR1	chr9:103791030-104087417	0	1.40041
LRAT	chr4:155665162-155674270	0	0.562563
LRFN2	chr6:40359372-40555126	0	0.0855086
LRFN5	chr14:42076763-42373752	0	0.106802
LRRC18	chr10:49893517-50191001	0	0.312494
LRRC29	chr16:67241041-67260901	0	0.149982
LRRC46	chr17:45908992-45918699	0	0.0734103
LRRC55	chr11:56949220-56959188	0	0.0120547
LRRC7	chr1:70225857-70589171	0	0.332118
LRRIQ1	chr12:85430098-85638883	0	0.0119694
LRRN3	chr7:110303105-111202573	0	0.131875
LRRTM4	chr2:76974849-77749502	0	0.0425362
LURAP1	chr1:46654352-46686928	0	0.536868
LYPD2	chr8:143831627-143833952	0	0.593341
MAB21L2	chr4:151185810-151936649	0	0.196154
MAL	chr2:95691478-95719735	0	0.186655
MAPK4	chr18:48086483-48258196	0	0.456884
MB	chr22:36002810-36019401	0	1.42274
MBOAT4	chr8:29920257-30108213	0	0.0865659
MEOX2	chr7:15650836-15726308	0	0.493873
MEP1B	chr18:29769986-29800366	0	1.64362
METTL24	chr6:110567148-110679475	0	1.13317
MGAT4C	chr12:86373036-87232681	0	0.145794
MGAT5B	chr17:74864797-74946471	0	0.0162773
MGC16703	chr22:21354060-21368576	0	0.0718092
MGC27345	chr7:127937737-127947816	0	0.00634352
MGC2752	chr19:59086765-59095762	0	0.0200288
MIAT	chr22:27053445-27072440	0	0.00639891
MIR155HG	chr21:26934456-26947480	0	0.0995895
MIR497HG	chr17:6915735-6922973	0	0.976983
MIR600HG	chr9:125871772-125877756	0	0.162727
MKRN3	chr15:23810453-23813166	0	0.0752087
MLIP	chr6:53883713-54131078	0	0.234984
MLLT4-AS1	chr6:168224569-168227476	0	0.0298841
MMP21	chr10:127455026-127464390	0	0.331904
MOGAT2	chr11:75428933-75442331	0	12.0778
MORC1	chr3:108677086-108836993	0	0.0176248
MORN3	chr12:122089292-122107560	0	0.598766
MPPED1	chr22:43808019-43902800	0	1.14717
MPZ	chr1:161274524-161279762	0	0.0360079
MRPL42P5	chr15:40824082-40824749	0	0.417721
MS4A1	chr11:60223281-60238225	0	2.76326
MS4A3	chr11:59824100-59838588	0	0.0554399
MS4A6E	chr11:60102354-60108441	0	0.141444
MT1B	chr16:56685810-56687116	0	1.91539
MT1DP	chr16:56677598-56678853	0	0.423443
MTMR7	chr8:17104400-17271040	0	0.0740405
MUSK	chr9:113431050-113563278	0	0.0834489
MUSTN1	chr3:52867130-52931597	0	2.57538
MYBPC2	chr19:50936159-50969583	0	2.81291
MYBPC3	chr11:47352956-47374253	0	0.172015
MYF6	chr12:81101407-81103256	0	0.0558897
MYH1	chr17:10395626-10421859	0	3.22357
MYH13	chr17:10204182-10276322	0	0.0216669
MYH2	chr17:10424464-10453017	0	14.5081
MYL1	chr2:211154867-211179895	0	7.29284
MYL2	chr12:111348623-111358404	0	11.5642
MYL3	chr3:46899356-46904973	0	0.439749
MYLK-AS1	chr3:123304402-123603149	0	0.231574
MYO3A	chr10:26223001-26501465	0	0.191051
MYO3B	chr2:171034654-171511674	0	0.0317168
MYOG	chr1:203052256-203055377	0	0.0409859
MYOM2	chr8:1993157-2093380	0	0.522026
MYOT	chr5:137203544-137223540	0	1.15715
MYOZ1	chr10:75391411-75401515	0	1.13456
MYOZ2	chr4:120056938-120108944	0	0.0525837
MYOZ3	chr5:150040403-150058925	0	0.0766293
NANOG	chr12:7941994-7948655	0	0.166347
NAP1L2	chrX:72432136-72434710	0	0.238936
NAP1L5	chr4:89513646-89629686	0	0.143783
NAT8L	chr4:2061238-2070816	0	0.0774572
NCCRP1	chr19:39687603-39692522	0	0.0356387
NCR3	chr6_ssto_hap7:2884757-2891563	0	1.14211
NEAT1	chr11:65190268-65194003	0	0.248993
NECAB2	chr16:84002236-84036379	0	8.6966
NEGR1	chr1:71868624-72748277	0	0.206556
NEU4	chr2:242750159-242758739	0	3.23717
NFE2	chr12:54685895-54694791	0	0.175
NGF	chr1:115828536-115880857	0	0.602027
NHLRC4	chr16:617031-619495	0	0.0342531
NIM1	chr5:43192326-43280952	0	0.0895666
NKD2	chr5:1009167-1038925	0	0.197927
NLGN1	chr3:173116243-174001116	0	0.093162
NLRP11	chr19:56296762-56393220	0	0.0654469
NLRP14	chr11:7041699-7092757	0	1.37073
NLRP5	chr19:56511091-56573174	0	0.0512011
NMUR1	chr2:232387870-232395182	0	0.0818715
NOS1	chr12:117645946-117799607	0	0.0118531
NOVA1	chr14:26915088-27066960	0	0.155161
NPBWR1	chr8:53852467-53853454	0	1.21978
NPFF	chr12:53900473-53901422	0	0.167142
NPFFR1	chr10:72014712-72043450	0	0.114438
NPY5R	chr4:164265090-164273086	0	0.307914
NPY6R	chr5:137136881-137146439	0	0.0903564
NRIP2	chr12:2934513-2944221	0	0.195541
NRK	chrX:105066535-105202602	0	0.127594
NRN1L	chr16:67918780-67920271	0	0.602563
NRTN	chr19:5823817-5828335	0	0.352916
NTN5	chr19:49141271-49185502	0	0.115967
NTNG1	chr1:107682628-108024475	0	0.299606
NTS	chr12:86268072-86276770	0	0.122506
NUDT10	chrX:51075082-51080377	0	1.19269
NXF5	chrX:101087084-101112549	0	0.0896666
OMD	chr9:95059639-95432547	0	0.13457
OR10J5	chr1:159504867-159505797	0	0.175653
OR13C2	chr9:107366951-107367908	0	0.338474
OR13C3	chr9:107298050-107299094	0	0.832797
OR13C4	chr9:107288533-107289490	0	0.169237
OR13C9	chr9:107379528-107380485	0	0.169237
OR1E1	chr17:3300759-3301704	0	0.430074
OR1E2	chr17:3336163-3337135	0	0.58055
OR1L8	chr9:125329826-125330756	0	0.0878263
OR1N2	chr9:125315448-125316441	0	0.403446
OR1Q1	chr9:125377016-125377961	0	0.344059
OR2AG2	chr11:6789237-6790188	0	0.341244
OR2D2	chr11:6912804-6913731	0	0.440989
OR2K2	chr9:114089762-114090713	0	0.255933
OR3A1	chr17:3194928-3195876	0	0.171323
OR3A2	chr17:3181183-3182268	0	0.144259
OR51B2	chr11:5344527-5345582	0	0.149428
OR52H1	chr11:5565790-5566753	0	0.167875
OR52K1	chr11:4510108-4511138	0	0.0770137
OR52N4	chr11:5775922-5776959	0	0.992624
OR5B12	chr11:58206592-58207646	0	0.149607
OR5B2	chr11:58189737-58190786	0	0.301014
OR5B21	chr11:58274648-58275578	0	0.175653
OR6N1	chr1:158735533-158736472	0	0.0867304
OR6S1	chr14:21108854-21109850	0	0.241135
OXT	chr20:3052265-3053162	0	0.212552
OXTR	chr3:8792094-8811300	0	0.0302034
P2RX3	chr11:57105840-57137549	0	1.31242
P2RX6	chr22:21369441-21382302	0	0.255497
PABPN1L	chr16:88929747-88933068	0	0.057429
PAGE2B	chrX:55101503-55105336	0	1.59039
PAGE5	chrX:55246790-55250541	0	4.85251
PAK7	chr20:9518036-9819687	0	0.0280884
PALM3	chr19:14164178-14169971	0	0.673867
PARK2	chr6:161768589-163745505	0	0.730166
PAX2	chr10:102505467-102589698	0	0.0163501
PAX5	chr9:36838530-37034476	0	0.364513
PCDH20	chr13:61983818-61989655	0	0.0411614
PCDHB19P	chr5:140619688-140624312	0	0.156166
PDE6H	chr12:15125955-15134799	0	0.472774
PENK	chr8:57353512-57359282	0	0.126977
PGA5	chr11:61008643-61018929	0	0.424009
PHOSPHO1	chr17:47300731-47308128	0	0.0639865
PHYHIPL	chr10:60936347-61122661	0	0.260471
PI15	chr8:75736771-75767264	0	0.710607
PIP5KL1	chr9:130683807-130693076	0	0.142046
PLA2G1B	chr12:120759913-120765592	0	1.26093
PLAC8L1	chr5:145463875-145483946	0	0.12332
PLCXD3	chr5:41307047-41510730	0	0.31605
PLGLA	chr2:106998569-107007851	0	26.2963
PM20D1	chr1:205797149-205819276	0	0.159152
PMP2	chr8:82352563-82359719	0	0.0747315
PNLDC1	chr6:160221300-160241735	0	0.146993
PNMA6A,PNMA6C,PNMA6D	chrX:152240726-152243402	0	0.396756
PNMA6C	chrX:152240726-152243402	0	1.86409e-12
PNMA6D	chrX:152240726-152243402	0	1.88898e-05
PNOC	chr8:28174648-28200868	0	0.127891
POM121L1P	chr22:22974027-22987012	0	0.215293
POU2AF1	chr11:111222980-111250157	0	0.578131
POU5F1P4	chr1:155305051-155533735	0	0.0722963
POU6F2	chr7:39017608-39504390	0	2.25394
PP12613	chr4:122680084-122687963	0	0.03118
PPEF2	chr4:76781025-76823681	0	0.0391549
PPP1R27	chr17:79791367-79792926	0	0.21524
PPP1R3E	chr14:23765111-23772057	0	0.058255
PPP4R4	chr14:94640648-94746072	0	0.11996
PRH2	chr12:10998447-11325723	0	0.0761908
PRINS	chr10:23983674-24836772	0	0.126741
PRND	chr20:4702555-4709106	0	0.299286
PRODH	chr22:18900286-18924066	0	2.14984
PRODH2	chr19:36290891-36304201	0	15.6038
PROX2	chr14:75319735-75330537	0	0.051271
PROZ	chr13:113812967-113826698	0	10.2069
PRPS1L1	chr7:18066399-18067486	0	0.0719637
PRR18	chr6:166719167-166721871	0	0.100641
PRR4	chr12:10998447-11325723	0	4.46133e-28
PRRT2	chr16:29823408-29827202	0	0.213017
PRSS42	chr3:46871893-46875585	0	0.0941727
PRSS50	chr3:46753605-46759373	0	0.553948
PTGER1	chr19:14583277-14586174	0	0.25994
PTGFR	chr1:78956727-79006386	0	0.19463
PTH2R	chr2:209271555-209359231	0	0.175487
PTPRQ	chr12:80838125-81073968	0	0.017063
PTPRT	chr20:40701391-41818557	0	0.00502552
PTPRVP	chr1:202137178-202158577	0	0.0161338
PTPRZ1	chr7:121513158-121702090	0	0.0585337
PURG	chr8:30853320-31031277	0	0.0253028
RAB9B	chrX:103077254-103087212	0	0.0698694
RAET1K	chr6:150319154-150326280	0	0.0375648
RALYL	chr8:85095452-85834078	0	0.0709511
RAPSN	chr11:47459307-47470730	0	0.301313
RASGEF1C	chr5:179527794-179636130	0	0.0939144
RASSF9	chr12:86198330-86230318	0	1.2287
RBFOX1	chr16:6069131-7763340	0	0.049482
RBM20	chr10:112404154-112599227	0	0.160506
RBM46	chr4:155702426-155749965	0	0.108638
RBMXL2	chr11:7110164-7112379	0	0.281884
RBPMS2	chr15:65032094-65067770	0	0.457825
RCVRN	chr17:9801026-9808684	0	0.261392
RDH12	chr14:68168602-68201168	0	0.226067
REM2	chr14:23352431-23356889	0	0.0381141
RERGL	chr12:18233802-18243114	0	0.0682722
RFPL1	chr22:29833003-29838444	0	0.489377
RFPL4A	chr19:56270506-56274541	0	3.44377
RGAG1	chrX:109437413-109699562	0	0.0720645
RGS13	chr1:192605267-192629440	0	0.143886
RGSL1	chr1:182419255-182529732	0	0.0706386
RHBDL3	chr17:30593194-30651680	0	0.0844719
RHBG	chr1:156338979-156355013	0	0.27414
RHOXF1	chrX:119243024-119249847	0	0.582168
RIC3	chr11:8060179-8190590	0	0.54556
RIPPLY1	chrX:106143292-106174091	0	0.387634
RNASE13	chr14:21500978-21502944	0	0.0900553
RND2	chr17:41177257-41184058	0	0.190801
RNF112	chr17:19314490-19320589	0	0.0831225
RNF126P1	chr17:55122838-55124156	0	0.11371
RNF133	chr7:121958477-122526813	0	0.357382
RNF175	chr4:154631311-154681387	0	0.324057
RNF212	chr4:1065265-1107352	0	0.614052
ROS1	chr6:117609529-117747018	0	0.0524919
RPS15AP10	chr1:46092975-46152302	0	0.0908888
RSPH6A	chr19:46298967-46318605	0	0.0552056
RTDR1	chr22:23401592-23484241	0	0.120966
RTN4RL1	chr17:1837970-1928178	0	0.021232
RTP3	chr3:46539484-46542439	0	32.6732
RUSC1-AS1	chr1:155278538-155300909	0	0.0574818
RXRG	chr1:165370158-165414592	0	0.173395
S100A1	chr1:153591275-153618782	0	0.997519
SAP25	chr7:100169852-100171270	0	0.506716
SCGB3A1	chr5:180017104-180018487	0	0.755498
SCGN	chr6:25652428-25702008	0	0.247987
SCN11A	chr3:38887259-38992052	0	0.199148
SCN1A	chr2:166845669-167005642	0	0.0559034
SCN2A	chr2:166095911-166248820	0	0.187574
SCN7A	chr2:167260082-167343481	0	0.260331
SCRG1	chr4:174309298-174320617	0	0.54772
SEBOX	chr17:26691289-26692265	0	0.419589
SEC14L3	chr22:30855215-30868034	0	0.201114
SELE	chr1:169691780-169703220	0	0.427609
SEMA3E	chr7:82993221-83278479	0	0.0975707
SERPINA9	chr14:94929057-94942670	0	0.0945455
SERPINE3	chr13:51915167-52027275	0	0.51138
SEZ6L	chr22:26565439-26779563	0	0.0102038
SFRP5	chr10:99526507-99531756	0	0.676166
SGCZ	chr8:13947372-15095792	0	0.159558
SH2D4B	chr10:82297657-82406316	0	0.0191332
SHH	chr7:155595557-155604967	0	1.56588
SIAH3	chr13:46354415-46425846	0	0.0662614
SIGLECP3	chr19:51670584-51676780	0	0.279644
SKOR1	chr15:68117940-68126174	0	0.0245482
SLC12A3	chr16:56899118-56949762	0	0.164523
SLC13A2	chr17:26800663-26824798	0	0.124467
SLC13A4	chr7:135365986-135412933	0	0.0233741
SLC14A2	chr18:42792946-43263060	0	0.0905204
SLC16A11	chr17:6944948-6947242	0	0.670828
SLC16A12	chr10:91190050-91295313	0	0.198846
SLC17A8	chr12:100750856-100815837	0	0.346057
SLC18A2	chr10:119000583-119038941	0	0.119829
SLC22A24	chr11:62847411-62911693	0	0.0664328
SLC22A25	chr11:62931295-62997124	0	15.7456
SLC23A1	chr5:138677518-138719039	0	5.85228
SLC25A34	chr1:16062808-16067884	0	0.109659
SLC26A1	chr4:972862-998317	0	0.883477
SLC26A5	chr7:102987970-103086624	0	0.184424
SLC26A7	chr8:92261515-92410378	0	0.0619964
SLC34A1	chr5:176811431-176825849	0	0.0368557
SLC35G3	chr17:33519538-33521412	0	0.0755378
SLC39A12	chr10:18240767-18332221	0	0.201845
SLC4A10	chr2:162480844-162841786	0	0.0817302
SLC4A9	chr5:139739786-139754722	0	0.0614639
SLC5A7	chr2:108602994-108630443	0	0.0380872
SLC6A13	chr12:329786-372039	0	1.73326
SLC6A19	chr5:1201709-1225230	0	0.277784
SLC6A4	chr17:28523377-28562954	0	0.057985
SLC7A13	chr8:87226287-87242604	0	0.113926
SLC8A3	chr14:70510933-70655787	0	0.0496275
SLC9A7P1	chr12:98847618-98850923	0	0.222886
SLC9B1	chr4:103790134-103940896	0	0.150621
SLCO1A2	chr12:21417533-21548371	0	0.160987
SLCO5A1	chr8:70584567-70747299	0	0.606518
SLFN14	chr17:33875143-33885110	0	0.0234794
SLITRK5	chr13:88324869-88331870	0	0.118356
SMTNL1	chr11:57310113-57317747	0	0.0437063
SMTNL2	chr17:4487275-4511614	0	0.072768
SMYD1	chr2:88367298-88412902	0	0.059417
SNORA58	chr3:131181044-131221860	0	3.48906
SNTG1	chr8:50824596-51705427	0	0.14972
SNTG2	chr2:946553-1371384	0	0.187374
SOAT2	chr12:53497273-53518323	0	0.202306
SPAG5-AS1	chr17:26926150-26972177	0	0.163577
SPATA21	chr1:16725137-16763919	0	0.208835
SPATA4	chr4:177105724-177116822	0	0.12323
SPATA9	chr5:94994019-95018714	0	0.619198
SPDYC	chr11:64937706-64940688	0	0.941727
SPDYE1	chr7:43966034-44058748	0	0.462941
SPHAR	chr1:229406878-229441250	0	0.0691783
SPIB	chr19:50922194-50934309	0	0.0954199
SPIC	chr12:101871334-101880775	0	6.39453
SPNS3	chr17:4337218-4391499	0	0.336065
SPSB4	chr3:140770742-140867453	0	0.0285476
SPTSSB	chr3:161062579-161089871	0	0.179734
SSX6	chrX:47967366-47980068	0	0.29279
ST8SIA3	chr18:55019720-55036161	0	0.0251851
STAP1	chr4:68424445-68472616	0	0.483701
STAR	chr8:38000217-38008600	0	0.101007
STK32A	chr5:146614578-146763768	0	0.0424028
STK33	chr11:8413417-8615503	0	0.47747
SULT1E1	chr4:70706929-70725870	0	5.20539
SYPL2	chr1:110009099-110024764	0	1.07149
SYT1	chr12:79257772-79845788	0	0.0544115
SYT6	chr1:114631913-114696472	0	0.121009
SYT9	chr11:7273180-7490276	0	1.48851
TAAR3	chr6:132929363-132930441	0	0.21815
TAGLN3	chr3:111717585-111732735	0	0.0636792
TAS1R1	chr1:6615337-6639817	0	0.0242719
TAS2R4	chr7:141478288-141479188	0	3.1174
TAS2R41	chr7:143078359-143220540	0	0.0885724
TBX15	chr1:119425665-119532179	0	3.98931
TCAP	chr17:37821598-37822807	0	0.419687
TCEAL2	chrX:101380659-101382684	0	0.354115
TCERG1L	chr10:132890654-133109984	0	0.078218
TDRD10	chr1:154474694-154520623	0	1.16723
TECTB	chr10:114043492-114063070	0	0.486016
TEKT4	chr2:95534429-95613087	0	0.202238
TEKT5	chr16:10721360-10788802	0	0.0899259
TEX15	chr8:30689059-30706533	0	0.0126447
TFPI2	chr7:93515744-93520065	0	0.985368
THAP7-AS1	chr22:21354060-21368576	0	0.8018
THPO	chr3:184089772-184095932	0	4.90309
THSD1P1	chr13:52741846-52768602	0	0.152794
TKTL2	chr4:164392246-164395047	0	0.0242156
TLR10	chr4:38773859-38784611	0	0.402003
TLR9	chr3:52255095-52260179	0	0.119894
TMEFF2	chr2:192814746-193059644	0	0.23587
TMEM100	chr17:53796987-53809482	0	0.366232
TMEM132D	chr12:129556270-130388212	0	0.0562621
TMEM244	chr6:130152388-130182416	0	0.191137
TMEM40	chr3:12775391-12800808	0	0.0838394
TMIGD2	chr19:4292224-4302428	0	0.241407
TMPRSS9	chr19:2389783-2427875	0	0.422347
TNFRSF13B	chr17:16842397-16875402	0	0.219442
TNFRSF17	chr16:12058963-12061925	0	1.53112
TNNC2	chr20:44451854-44455953	0	6.61659
TNNI1	chr1:201372894-201390874	0	0.0105574
TNNT3	chr11:1940798-1959936	0	18.4685
TNXA	chr6_ssto_hap7:3306068-3368931	0	0.219469
TNXB	chr6_ssto_hap7:3306068-3368931	0.728371	11.6558
TPH2	chr12:72332625-72426221	0	0.0292005
TPPP2	chr14:21498344-21500332	0	3.88769
TPTE2	chr13:19997018-20110903	0	0.619653
TPTEP1	chr22:17082800-17129720	0	0.309612
TRDN	chr6:123537483-123958238	0	1.07689
TREX2	chrX:152710177-152711945	0	0.0603081
TRIM55	chr8:67039277-67087718	0	4.88255
TRIM61	chr4:165875597-165898818	0	0.413281
TRPC3	chr4:122800182-122872909	0	0.0200967
TRPC5	chrX:111017541-111326004	0	0.289285
TRPM3	chr9:73149965-73736514	0	0.599739
TSHR	chr14:81421868-81612646	0	3.33616
TSIX	chrX:73012039-73072588	0	0.0254916
TSLP	chr5:110405777-110413722	0	0.57043
TSPAN32	chr11:2323242-2339430	0	1.24218
TSPEAR	chr21:45917774-46131495	0	0.050054
TSPYL6	chr2:54342409-54532435	0	0.0434824
TSSK6	chr19:19625027-19626469	0	0.0510963
TTC24	chr1:156549518-156556562	0	0.770013
TTYH1	chr19:54926604-54947899	0	0.648333
TUG1	chr22:31365633-31375380	0	0.0363362
TXNDC3	chr7:37888198-37940002	0	0.328725
TYRO3P	chr15:76508628-76603810	0	1.54873
UBAP1L	chr15:65385341-65398697	0	0.3221
UBE2Q2P1	chr15:85070426-85123412	0	0.420863
UGT2A1	chr4:70454134-70518967	0	0.000200231
UGT2A2	chr4:70454134-70518967	0	0.478885
UGT2B11	chr4:70066050-70080449	0	8.32241
UGT3A2	chr5:36035118-36067023	0	0.0605722
ULK4P2	chr15:32698800-32727250	0	0.570186
UNC13A	chr19:17712136-17799008	0	0.0715268
UNC80	chr2:210636716-210864024	0	0.0235567
UPP2	chr2:158851690-158992666	0	0.799057
USH2A	chr1:215796235-216596738	0	0.40217
USP44	chr12:95910887-95945263	0	0.0201274
USP50	chr15:50716578-50838902	0	0.053272
UTS2	chr1:7907671-7913551	0	0.177571
VAX2	chr2:71127719-71160575	0	0.0673897
VGLL2	chr6:117586720-117594728	0	0.0419466
VHLL	chr1:156268414-156269428	0	0.0785612
VIP	chr6:153071932-153080902	0	0.137156
VIPR2	chr7:158820865-158937649	0	0.117513
VPREB3	chr22:24094929-24096630	0	0.340653
VSIG2	chr11:124617369-124622109	0	0.554039
VSX1	chr20:25051520-25063015	0	0.274019
WDR93	chr15:90234027-90286869	0	0.171285
WEE2	chr7:141404137-141438030	0	0.0440024
WNT10A	chr2:219745254-219758651	0	0.34797
XIRP2	chr2:167744996-168116261	0	1.17291
YJEFN3	chr19:19639669-19648393	0	0.460951
ZDHHC19	chr3:195924322-195938300	0	0.111779
ZFR2	chr19:3804021-3869027	0	0.192693
ZIC1	chr3:147127180-147134506	0	0.0998234
ZNF321P	chr19:53430387-53466164	0	0.147796
ZNF385D	chr3:21462489-21792816	0	0.196189
ZNF491	chr19:11909390-11919306	0	0.552255
ZNF492	chr19:22817125-22850472	0	0.0465988
ZNF497	chr19:58858171-58874214	0	0.0770493
ZNF541	chr19:48023946-48059113	0	0.0141711
ZNF676	chr19:22361902-22379753	0	0.230299
ZNF705A	chr12:8325149-8332642	0	0.369084
ZNF724P	chr19:23406606-23433172	0	1.25014
ZNF726	chr19:24097683-24116769	0	0.394046
ZNF80	chr3:113953479-113956425	0	0.206357
ZNF804A	chr2:185463092-185804214	0	0.42009
ZNF833P	chr19:11784812-11797384	0	0.0350988
ZNF853	chr7:6655526-6663921	0	0.409555
ZNF883	chr9:115759399-115774472	0	0.0289438
ZNF98	chr19:22573898-22605148	0	0.153152
ZSCAN5B	chr19:56701057-56704421	0	0.0888403
ZYG11A	chr1:53308182-53360247	0	0.401265
ATP6V1G2	chr6_ssto_hap7:2827543-2845430	1.14221e-173	0.0507793
ZHX1-C8ORF76	chr8:124232195-124287781	6.52172e-108	1.44099
LOC100499484	chr9:100000707-100139577	3.16718e-84	0.374219
TMX2-CTNND1	chr11:57479994-57586652	1.33467e-105	2.8053e-24
PCDHA2	chr5:140165875-140391929	1.66511e-82	0.0521019
PCDHA13	chr5:140165875-140391929	5.18375e-80	0.651244
PCDHA3	chr5:140165875-140391929	5.18375e-80	0.138564
PCDHA8	chr5:140165875-140391929	5.18375e-80	0.0561723
C1QTNF3	chr5:33987090-34124633	4.02609e-78	0.24202
BGLAP	chr1:156182778-156213123	1.27212e-139	1.96582e-73
PIR-FIGF	chrX:15363712-15511711	4.23013e-106	2.90552e-43
MEF2B	chr19:19256375-19314238	6.28419e-63	0.313304
MIA	chr19:41281081-41314346	6.17068e-46	3.50654
ZNF816-ZNF321P	chr19:53430387-53466164	1.1988e-82	1.98026e-42
BAGE,BAGE5	chr21:11020841-11098937	4.32304e-25	0.085311
GCOM1	chr15:57884101-58009755	1.47608e-68	2.96184e-46
FXYD6-FXYD2	chr11:117690789-117748201	5.45956e-58	1.69008e-38
AS3MT	chr10:104613966-104661655	1.05071e-13	8.65662
TEN1-CDK3	chr17:73937588-74002080	5.70405e-15	0.313418
UGT1A3	chr2:234526290-234681951	1.07439e-11	2.73506
UGT1A8	chr2:234526290-234681951	4.72557e-12	0.994972
UGT1A7	chr2:234526290-234681951	1.30715e-11	1.65843
CORT	chr1:10490158-10512060	3.46188e-12	0.122044
UGT1A5	chr2:234526290-234681951	1.07439e-11	0.328207
HEATR8	chr1:55107426-55208328	1.00775e-08	2.34633
ZNF559-ZNF177	chr19:9434447-9493293	5.0733e-09	0.392456
LOC254896	chr8:22941867-22974950	8.61687e-09	0.145454
ARL2-SNX15	chr11:64781584-64808044	2.32187e-12	1.84063e-05
CYP3A7-CYP3AP1	chr7:99282301-99332819	5.10281e-06	7.86211
CCL14-CCL15,CCL15	chr17:34310691-34329084	3.85042e-05	3.72549
FAM24B-CUZD1	chr10:124591670-124658230	1.14449e-10	1.03757e-05
ZNF664-FAM101A	chr12:124457761-124800570	3.42612e-43	7.47807e-39
CYP21A2	chr6_ssto_hap7:3306068-3368931	0.793889	24.5016
KLRC4-KLRK1,KLRK1	chr12:10524951-10562745	4.27759e-05	0.177764
FSBP	chr8:95384187-95487343	0.00011301	0.292132
LOC728855	chr1:149576261-149672733	7.85848e-05	0.118568
FKBP1A-SDCBP2	chr20:1290554-1373816	2.30032e-17	3.10903e-14
AGMO	chr7:15239942-15601640	0.0266825	34.5025
GLYAT	chr11:58476229-58499447	0.0665908	83.459
MASP2	chr1:11086579-11107296	0.0269208	27.8552
GNMT	chr6:42928499-42946981	0.0707531	55.5467
UGT3A1	chr5:35953190-36001130	0.0226428	17.3068
PIK3C2G	chr12:18414473-18801352	0.0260475	19.3091
TTR	chr18:29171729-29178986	10.8375	7839.34
ANXA10	chr4:169013687-169108893	0.0489673	31.7544
SPP2	chr2:234959345-234985776	0.300285	192.601
UPB1	chr22:24891250-24922553	0.195386	119.68
OSTalpha	chr3:195943382-195960301	0.0973021	54.1491
CYP4F2	chr19:15988833-16008884	0.0843412	42.0488
AKR1D1	chr7:137761177-137803050	0.0966727	48.0976
HAO1	chr20:7863630-7921093	0.196985	97.5416
APOA2	chr1:161192082-161193418	21.3418	10408.5
UGT2B10	chr4_ctg9_hap1:582545-587974	0.474609	229.565
CCL3L1,CCL3L3	chr17:34623841-34625730	0.00949743	5.64397
F13B	chr1:197008320-197036397	0.210861	90.2379
GSTA1	chr6:52656177-52668664	1.84943	776.127
GAS2	chr11:22688159-22834547	0.0666736	26.9151
SLC22A10	chr11:63014620-63330855	0.0255621	10.2743
APOF	chr12:56754354-56756583	0.204608	81.5071
UGT2B7	chr4:69962192-69978705	0.829665	329.815
ANGPTL3	chr1:62920396-63153969	1.04142	411.437
ACMSD	chr2:135596185-135676176	0.174893	68.9024
IGJ	chr4:71521257-71532348	1.01054	392.788
HRG	chr3:186383797-186396023	3.68049	1349.86
PON3	chr7:94989183-95025687	0.618261	223.48
LECT2	chr5:135282599-135290723	0.350067	121.724
APOC4	chr19:45445494-45452822	0.352274	122.265
UGT1A9	chr2:234526290-234681951	0.0560038	19.0132
GSTA2	chr6:52614884-52628361	1.10301	371.229
CDO1	chr5:115140429-115152405	0.129352	43.4131
TF	chr3:133464976-133497850	9.73767	3128.24
SERPINA4	chr14:95027782-95036243	0.750864	240.943
ARG1	chr6:131894343-131949363	0.527917	167.373
CYP2C8	chr10:96796528-96829254	1.27047	401.962
LOC100507203	chr6:131148544-131158276	0.104918	32.6906
SLC22A1	chr6:160542862-160579750	0.570675	176.322
PON1	chr7:94927668-94953884	1.13805	348.154
BAAT	chr9:104122698-104147287	0.480425	144.139
APOH	chr17:64208146-64225556	6.97661	2063.58
ADH4	chr4:100010007-100222513	1.88044	549.807
RGN	chrX:46937774-46952712	0.215431	62.6281
PLA2G12B	chr10:74694937-74714510	0.0688144	19.8915
SLC22A9	chr11:63014620-63330855	0.0288126	8.28977
TAT	chr16:71600753-71610998	0.948843	270.938
PGLYRP2	chr19:15579456-15590315	0.181012	51.3752
PAH	chr12:103232103-103311381	0.660217	185.995
CYP2A6	chr19:41349442-41356352	1.28498	358.236
CFHR2	chr1:196912933-196928356	3.0141	835.511
SERPINA7	chrX:105277189-105282718	0.436797	116.191
ADH1C	chr4:100257648-100273917	1.58249	415.669
KIAA0408	chr6:127759550-127840500	9.47145e-06	0.00247338
AADAC	chr3:151347319-151546276	0.303558	79.0805
CD302	chr2:160625138-160761267	0.045903	11.8381
LPA	chr6:160952514-161087407	0.163342	41.7349
MBL2	chr10:54525139-54531460	0.0359526	9.18374
SLC25A47	chr14:100789678-100796715	0.0794693	20.2702
ABCG5	chr2:44039610-44065958	0.0955235	24.3052
SLC38A3	chr3:50242691-50258406	0.619732	157.587
BBOX1	chr11:27062508-27149354	0.036094	9.11183
AFM	chr4:74347461-74369718	1.48915	372.674
APOC3	chr11:116700623-116703787	36.1369	9031.3
GLYATL1	chr11:58695101-58825925	0.305038	75.8477
SCHIP1	chr3:158787040-159615155	0.00711437	1.72368
MYBPC1	chr12:101988708-102079658	0.0170088	4.09898
SRD5A2	chr2:31749655-31806040	0.0270416	6.45981
HGD	chr3:120347014-120401418	0.369589	88.0601
F11	chr4:187187117-187422212	0.216532	51.3481
KNG1	chr3:186435097-186462199	3.06483	726.031
SLC17A4	chr6:25754926-25781403	0.0534348	12.6321
UROC1	chr3:126200007-126236616	0.0395341	9.31985
CPB2	chr13:46626982-46679211	1.32221	310.889
SERPIND1	chr22:21061978-21213100	1.98415	465.308
SLC2A2	chr3:170714136-170744768	0.878966	205.108
ACTA1	chr1:229566992-229569843	0.0944803	22.042
HMGCS2	chr1:120290618-120311555	1.13513	263.881
SERPINA11	chr14:94908800-94919122	0.720461	165.914
CFHR1	chr1:196788860-196801319	21.8033	4916.32
PLG	chr6:161123224-161175085	3.99289	894.462
HSD17B13	chr4:88224940-88244056	0.553243	122.734
ALDOB	chr9:104182841-104198062	9.13682	1997.08
SLC17A2	chr6:25912983-25930946	0.111674	24.3579
AHSG	chr3:186330849-186339107	5.59693	1217.17
DMGDH	chr5:78293428-78365449	0.462521	98.5508
BHMT	chr5:78407603-78428113	0.818102	173.528
FMO5	chr1:146655883-146697230	0.61337	129.527
PKLR	chr1:155247373-155271225	0.0857955	18.0718
SLC1A2	chr11:35272751-35441610	0.0158119	3.3067
AKR1C4	chr10:5238797-5260910	1.48231	308.454
ABCG8	chr2:44066102-44105605	0.295347	60.9637
NR1H4	chr12:100867550-100957645	0.257383	53.1042
CYP4A11	chr1:47394845-47407156	0.851496	172.691
WDR72	chr15:53805937-54051859	0.0509854	10.3123
TTC36	chr11:118398209-118401740	0.130215	26.3099
UGT1A1	chr2:234526290-234681951	0.342034	68.9118
MTTP	chr4:100485239-100545154	0.482318	95.3772
SLC28A1	chr15:85427912-85489027	0.166639	32.7636
SERPINC1	chr1:173872941-173886516	6.40699	1249.78
APOB	chr2:21224300-21266945	6.03377	1156.8
CYP3A4	chr7:99354582-99381811	3.97842	762.654
NR1I3	chr1:161195832-161208000	0.138416	26.3787
CPS1	chr2:211342405-211543831	4.53421	852.4
DIO1	chr1:54359860-54376759	0.25045	46.6683
DMRTA1	chr9:22446839-22452472	0.057791	10.7447
G6PC	chr17:41052814-41065386	0.586006	108.929
SLC10A1	chr14:70242551-70264006	0.425992	78.9652
ACSM5	chr16:20420855-20452281	0.684019	126.118
GBA3	chr4:22694547-22821192	0.298169	54.863
FETUB	chr3:186358148-186370797	0.427199	77.9908
AMBP	chr9:116822407-116840752	15.4536	2813.04
APOA1	chr11:116706468-116708338	26.9109	4867.58
HPR	chr16:72097124-72111145	3.64265	656.967
ACSM2A	chr16:20462858-20498991	0.592222	106.807
LEAP2	chr5:132209357-132210582	1.22788	220.041
ADH1A	chr4:100010007-100222513	3.80261	679.381
SULT2A1	chr19:48373722-48389654	0.816849	145.846
RBP4	chr10:95351592-95360993	23.3356	4143.22
IGFALS	chr16:1840413-1844909	0.261622	46.3706
ADH1B	chr4:100227526-100242572	6.62394	1159.74
HGFAC	chr4:3443725-3451213	0.132331	23.094
NDST3	chr4:118955499-119179789	0.0105171	1.83431
GPLD1	chr6:24428404-24489850	0.165805	28.8859
KLKB1	chr4:187148671-187179625	0.623239	107.554
ATP2B2	chr3:10365706-10547268	0.0349933	5.83205
FOLH1B	chr11:89392464-89431886	0.0685742	11.3979
ABCC6P1	chr16:18582569-18609607	0.0480664	7.98706
[truncated: 21,270 more rows]
