# Supplementary material for: Responsiveness to PD-1 Blockade in End-Stage Colon Cancer with Gene Locus 9p24.1 Copy-Number Gain
Source: Oxford University Press journal article supplement (doi:10.1158/2326-6066.cir-18-0777), 2019-02-25
Supplement: 23266066cir180777-sup-211320_2_supp_5317781_pm99yd.xlsx [file 23266066cir180777-sup-211320_2_supp_5317781_pm99yd.xlsx]

## Sheet: Sheet1
Gene ID	Locus	Baseline FPKM	2-week FPKM	Log2 FC
AGXT2	chr5:34998205-35048240	0	19.0673	inf
ANKRD36BP2	chr2:89065418-89106109	0	5.33613	inf
C1orf168	chr1:57184476-57285369	0	5.86528	inf
C2orf16	chr2:27799388-27805589	0	0.899132	inf
CA5A	chr16:87921624-87970112	0	9.89317	inf
CLEC4M	chr19:7828034-7834491	0	6.61159	inf
CNDP1	chr18:72201691-72252261	0	11.5617	inf
DCDC5	chr11:30885149-31014233	0	1.23974	inf
DSG1	chr18:28898051-28937393	0	8.88985	inf
FNDC5	chr1:33327868-33338082	0	1.69849	inf
GOLGA6B	chr15:72947037-72959738	0	11.4956	inf
GOLGA8IP	chr15:23255241-23262743	0	3.16262	inf
GRB14	chr2:165349322-165478360	0	14.4762	inf
IYD	chr6:150690027-150725765	0	2.67157	inf
MOGAT2	chr11:75428933-75442331	0	12.0778	inf
MYBPC2	chr19:50936159-50969583	0	2.81291	inf
MYH1	chr17:10395626-10421859	0	3.22357	inf
MYH2	chr17:10424464-10453017	0	14.5081	inf
MYL2	chr12:111348623-111358404	0	11.5642	inf
NECAB2	chr16:84002236-84036379	0	8.6966	inf
NLRP14	chr11:7041699-7092757	0	1.37073	inf
POU6F2	chr7:39017608-39504390	0	2.25394	inf
PRODH2	chr19:36290891-36304201	0	15.6038	inf
RTP3	chr3:46539484-46542439	0	32.6732	inf
SLC22A25	chr11:62931295-62997124	0	15.7456	inf
SULT1E1	chr4:70706929-70725870	0	5.20539	inf
SYT9	chr11:7273180-7490276	0	1.48851	inf
TBX15	chr1:119425665-119532179	0	3.98931	inf
THPO	chr3:184089772-184095932	0	4.90309	inf
UGT2B11	chr4:70066050-70080449	0	8.32241	inf
XIRP2	chr2:167744996-168116261	0	1.17291	inf
ANXA13	chr8:124693033-124749647	0	3.13854	inf
CLEC1B	chr12:10145661-10151899	0	9.72928	inf
NEU4	chr2:242750159-242758739	0	3.23717	inf
PLGLA	chr2:106998569-107007851	0	26.2963	inf
LDB3	chr10:88428205-88495824	0	1.33703	inf
CYP3A43	chr7:99425635-99464173	0	6.23088	inf
TNNT3	chr11:1940798-1959936	0	18.4685	inf
CHST9	chr18:24432007-24765302	0	8.13295	inf
TRDN	chr6:123537483-123958238	0	1.07689	inf
SLC6A13	chr12:329786-372039	0	1.73326	inf
CYP11A1	chr15:74630102-74660081	0	3.10288	inf
PROZ	chr13:113812967-113826698	0	10.2069	inf
TRIM55	chr8:67039277-67087718	0	4.88255	inf
MYL1	chr2:211154867-211179895	0	7.29284	inf
PRODH	chr22:18900286-18924066	0	2.14984	inf
MS4A1	chr11:60223281-60238225	0	2.76326	inf
MB	chr22:36002810-36019401	0	1.42274	inf
TDRD10	chr1:154474694-154520623	0	1.16723	inf
TSHR	chr14:81421868-81612646	0	3.33616	inf
UPP2	chr2:158851690-158992666	0	0.799057	inf
LPPR1	chr9:103791030-104087417	0	1.40041	inf
RNF212	chr4:1065265-1107352	0	0.614052	inf
CD19	chr16:28943259-28950668	0	0.82793	inf
TPTE2	chr13:19997018-20110903	0	0.619653	inf
CES5A	chr16:55880065-55989943	0	0.767438	inf
CHRNA1	chr2:175612322-175629200	0	0.709531	inf
TTYH1	chr19:54926604-54947899	0	0.648333	inf
LGI1	chr10:95517565-95557916	0	1.54331	inf
GLTPD2	chr17:4692253-4693884	0	4.8586	inf
MYOT	chr5:137203544-137223540	0	1.15715	inf
GOLGA6C	chr15:75550898-75565796	0	0.666607	inf
MEP1B	chr18:29769986-29800366	0	1.64362	inf
PI15	chr8:75736771-75767264	0	0.710607	inf
PAGE5	chrX:55246790-55250541	0	4.85251	inf
GMNC	chr3:190570525-190580465	0	1.26717	inf
KRT222	chr17:38811871-38821416	0	2.8448	inf
EMBP1	chr1:121260909-121313686	0	0.935226	inf
IGSF23	chr19:45116939-45140081	0	3.89317	inf
CRYAA	chr21:44589140-44592913	0	4.67631	inf
FGF14	chr13:102373204-103054124	0	0.62498	inf
GDF2	chr10:48413091-48416853	0	2.43921	inf
AMPD1	chr1:115215719-115238239	0	0.862277	inf
TNNC2	chr20:44451854-44455953	0	6.61659	inf
CCDC158	chr4:77234191-77328458	0	1.11959	inf
CTNND2	chr5:10971951-11904110	0	0.731252	inf
SPIC	chr12:101871334-101880775	0	6.39453	inf
SYPL2	chr1:110009099-110024764	0	1.07149	inf
C20orf152	chr20:34556528-34618622	0	0.766178	inf
AKR1B10	chr7:134212343-134226166	0	1.86087	inf
GPR37	chr7:124386113-124405681	0	0.75333	inf
GUCA1B	chr6:42151021-42162694	0	1.00588	inf
AZGP1P1	chr7:99578384-99581860	0	2.208	inf
NUDT10	chrX:51075082-51080377	0	1.19269	inf
SHH	chr7:155595557-155604967	0	1.56588	inf
TAS2R4	chr7:141478288-141479188	0	3.1174	inf
CNTFR	chr9:34551429-34590138	0	0.658328	inf
ENHO	chr9:34521039-34523037	0	2.25421	inf
RASSF9	chr12:86198330-86230318	0	1.2287	inf
CYP1A1	chr15:75011882-75017877	0	0.6281	inf
MYOZ1	chr10:75391411-75401515	0	1.13456	inf
ACTN3	chr11:66314390-66330797	0	0.616246	inf
ARID3C	chr9:34621454-34628011	0	1.59258	inf
CLEC4F	chr2:71035776-71047732	0	0.721173	inf
P2RX3	chr11:57105840-57137549	0	1.31242	inf
GDF7	chr2:20866423-20871250	0	1.12695	inf
KCNJ16	chr17:68071425-68131746	0	0.641538	inf
TPPP2	chr14:21498344-21500332	0	3.88769	inf
LINC00574	chr6:170188885-170202969	0	1.03892	inf
MPPED1	chr22:43808019-43902800	0	1.14717	inf
LOC728989	chr1:146490894-146514599	0	2.55101	inf
CD1C	chr1:158259562-158264564	0	0.65868	inf
LGALS2	chr22:37966252-37976024	0	5.04005	inf
AFP	chr4:74301932-74321492	0	1.31023	inf
RFPL4A	chr19:56270506-56274541	0	3.44377	inf
BMP5	chr6:55620237-55740375	0	1.2817	inf
C10orf114	chr10:21783420-21786213	0	0.953552	inf
TSPAN32	chr11:2323242-2339430	0	1.24218	inf
ASPDH	chr19:51014856-51017947	0	1.13563	inf
PALM3	chr19:14164178-14169971	0	0.673867	inf
TTC24	chr1:156549518-156556562	0	0.770013	inf
CLEC4C	chr12:7882010-7902069	0	0.74181	inf
LINC00115	chr1:761585-762902	0	1.08123	inf
TNFRSF17	chr16:12058963-12061925	0	1.53112	inf
C5orf27	chr5:95187935-95195836	0	0.663027	inf
SFRP5	chr10:99526507-99531756	0	0.676166	inf
C2orf61	chr2:47314129-47382517	0	0.929138	inf
ABCC6P2	chr16:14916288-14918559	0	1.92178	inf
NPBWR1	chr8:53852467-53853454	0	1.21978	inf
TFPI2	chr7:93515744-93520065	0	0.985368	inf
C15orf26	chr15:81426643-81441516	0	0.737428	inf
DKFZp779M0652	chr11:45792982-45793909	0	2.32083	inf
METTL24	chr6:110567148-110679475	0	1.13317	inf
CAPZA3	chr12:18891044-18892122	0	0.945315	inf
GPR25	chr1:200842165-200843251	0	0.936605	inf
IGLL3P	chr22:25714223-25716193	0	1.77846	inf
OR52N4	chr11:5775922-5776959	0	0.992624	inf
HORMAD2	chr22:30476452-30573062	0	0.634032	inf
SLC16A11	chr17:6944948-6947242	0	0.670828	inf
LOC390940	chr19:44080951-44086256	0	1.75093	inf
IL21	chr4:123533782-123542212	0	1.41009	inf
CTSG	chr14:25042723-25045466	0	1.06287	inf
INSL3	chr19:17927321-17932320	0	1.43185	inf
JSRP1	chr19:2252249-2256422	0	0.809548	inf
C2orf62	chr2:219221578-219232817	0	0.622574	inf
GP9	chr3:128779644-128781253	0	1.07473	inf
HLA-DPB2	chr6_ssto_hap7:4560770-4577055	0	1.17172	inf
OR13C3	chr9:107298050-107299094	0	0.832797	inf
BLID	chr11:121959810-122073770	0	0.970961	inf
SPATA9	chr5:94994019-95018714	0	0.619198	inf
SPDYC	chr11:64937706-64940688	0	0.941727	inf
CYTL1	chr4:5016313-5021197	0	0.719705	inf
DYNLRB2	chr16:80574853-80584541	0	2.01556	inf
FDCSP	chr4:71091787-71100968	0	1.6212	inf
FGF16	chrX:76709646-76712013	0	4.16418	inf
LOC100507582	chr3:4939913-4948186	0	0.729024	inf
CCDC153	chr11:119060962-119066584	0	0.911119	inf
CCL17	chr16:57438678-57449974	0	1.25973	inf
CRLF2	chrY:1264886-1281530	0	0.792898	inf
CAMP	chr3:48264836-48266981	0	0.830494	inf
FAM209B	chr20:55108301-55111576	0	0.919427	inf
PAGE2B	chrX:55101503-55105336	0	1.59039	inf
PLA2G1B	chr12:120759913-120765592	0	1.26093	inf
ZNF724P	chr19:23406606-23433172	0	1.25014	inf
BMP6	chr6:7727010-8102828	0	0.888302	inf
CCL27	chr9:34661892-34662689	0	1.64268	inf
FLJ40194	chr17:47325604-47336027	0	0.620267	inf
MT1B	chr16:56685810-56687116	0	1.91539	inf
ASIP	chr20:32848170-32857148	0	0.683166	inf
TYRO3P	chr15:76508628-76603810	0	1.54873	inf
SCGB3A1	chr5:180017104-180018487	0	0.755498	inf
KRTAP10-3	chr21:45917774-46131495	0	0.721429	inf
MIR497HG	chr17:6915735-6922973	0	0.976983	inf
HIGD1B	chr17:42925278-42976993	0	0.766118	inf
CARD17	chr11:104896236-104972158	0	1.76283	inf
FAM209A	chr20:55043646-55101208	0	0.815476	inf
KANSL1-AS1	chr17_ctg5_hap1:563497-760700	0	2.67246	inf
HCG4	chr6_ssto_hap7:1096479-1103140	0	1.19952	inf
S100A1	chr1:153591275-153618782	0	0.997519	inf
ATP1A4	chr1:160121351-160156767	0	1.29919	inf
SNORA58	chr3:131181044-131221860	0	3.48906	inf
PARK2	chr6:161768589-163745505	0	0.730166	inf
C22orf45	chr22:24823529-24890783	0	1.62359	inf
SLC23A1	chr5:138677518-138719039	0	5.85228	inf
C19orf71	chr19:3538262-3557571	0	0.690058	inf
NCR3	chr6_ssto_hap7:2884757-2891563	0	1.14211	inf
FAM151A	chr1:55013806-55100417	0	1.24169	inf
MUSTN1	chr3:52867130-52931597	0	2.57538	inf
THAP7-AS1	chr22:21354060-21368576	0	0.8018	inf
CTRL	chr16:67927174-67965778	0	0.973106	inf
KCNIP1	chr5:169780880-170163636	0	0.729499	inf
C10orf62	chr10:99344101-99372555	0	0.671808	inf
SLC26A1	chr4:972862-998317	0	0.883477	inf
SEC14L3	chr22:30855215-30868034	0	0.201114	inf
SLC39A12	chr10:18240767-18332221	0	0.201845	inf
TEKT4	chr2:95534429-95613087	0	0.202238	inf
SOAT2	chr12:53497273-53518323	0	0.202306	inf
BEND4	chr4:42112869-42154895	0	0.202907	inf
KCNT1	chr9:138594030-138684993	0	0.206214	inf
ZNF80	chr3:113953479-113956425	0	0.206357	inf
NEGR1	chr1:71868624-72748277	0	0.206556	inf
ITGB1BP3	chr19:3933100-3942414	0	0.206621	inf
CXorf31	chrX:46746853-46759139	0	0.206933	inf
SPATA21	chr1:16725137-16763919	0	0.208835	inf
GPR1	chr2:207040041-207082771	0	0.20889	inf
FLJ45079	chr17:75875082-75880169	0	0.209156	inf
KCNJ3	chr2:155555092-155713014	0	0.210682	inf
LOC653712	chr3:128580350-128590384	0	0.21175	inf
OXT	chr20:3052265-3053162	0	0.212552	inf
PRRT2	chr16:29823408-29827202	0	0.213017	inf
CLEC18C	chr16:70207927-70220798	0	0.214198	inf
PPP1R27	chr17:79791367-79792926	0	0.21524	inf
KCNIP2	chr10:103578824-103603677	0	0.215266	inf
POM121L1P	chr22:22974027-22987012	0	0.215293	inf
IQUB	chr7:123092235-123174718	0	0.215986	inf
C1orf186	chr1:206238871-206288647	0	0.216116	inf
ELK2AP	chr14:106135913-106139144	0	0.217863	inf
TAAR3	chr6:132929363-132930441	0	0.21815	inf
TNFRSF13B	chr17:16842397-16875402	0	0.219442	inf
TNXA	chr6_ssto_hap7:3306068-3368931	0	0.219469	inf
LOC642236	chr9:68427782-68454375	0	0.219939	inf
ASCL1	chr12:103351451-103354294	0	0.220822	inf
GRM5	chr11:88237743-88796816	0	0.221142	inf
CNGA4	chr11:6260321-6265707	0	0.221662	inf
FREM1	chr9:14734663-14910993	0	0.221866	inf
SLC9A7P1	chr12:98847618-98850923	0	0.222886	inf
C1orf173	chr1:75033794-75139422	0	0.225302	inf
RDH12	chr14:68168602-68201168	0	0.226067	inf
FLJ42280	chr7:96110937-96132835	0	0.228929	inf
ZNF676	chr19:22361902-22379753	0	0.230299	inf
HRC	chr19:49654455-49658681	0	0.231016	inf
CACNA1S	chr1:201008639-201081694	0	0.231286	inf
MYLK-AS1	chr3:123304402-123603149	0	0.231574	inf
MLIP	chr6:53883713-54131078	0	0.234984	inf
TMEFF2	chr2:192814746-193059644	0	0.23587	inf
AJAP1	chr1:4715104-4843851	0	0.236405	inf
GDNF	chr5:37812778-37839782	0	0.236582	inf
KLHL31	chr6:53512698-53530506	0	0.237755	inf
ICAM4	chr19:10397642-10399260	0	0.238921	inf
NAP1L2	chrX:72432136-72434710	0	0.238936	inf
OR6S1	chr14:21108854-21109850	0	0.241135	inf
TMIGD2	chr19:4292224-4302428	0	0.241407	inf
LOC728392	chr17:5402746-5404319	0	0.245264	inf
KCNA2	chr1:111136201-111174096	0	0.246251	inf
SCGN	chr6:25652428-25702008	0	0.247987	inf
NEAT1	chr11:65190268-65194003	0	0.248993	inf
FLJ30403	chr19:52095035-52097633	0	0.253044	inf
FLJ22763	chr3:108855560-108868951	0	0.255288	inf
P2RX6	chr22:21369441-21382302	0	0.255497	inf
DNAH8	chr6:38683116-38998574	0	0.255924	inf
OR2K2	chr9:114089762-114090713	0	0.255933	inf
GABRB3	chr15:26788693-27018935	0	0.258463	inf
KCNA5	chr12:5153084-5155949	0	0.259932	inf
PTGER1	chr19:14583277-14586174	0	0.25994	inf
LOC100128071	chr1:32826870-32827844	0	0.259964	inf
SCN7A	chr2:167260082-167343481	0	0.260331	inf
PHYHIPL	chr10:60936347-61122661	0	0.260471	inf
RCVRN	chr17:9801026-9808684	0	0.261392	inf
GATA5	chr20:61038552-61051026	0	0.26314	inf
CASR	chr3:121902529-122005344	0	0.266341	inf
IZUMO1	chr19:49244144-49250166	0	0.267471	inf
GABRA5	chr15:27111865-27194357	0	0.270237	inf
ADCY8	chr8:131792546-132052835	0	0.273852	inf
C11orf91	chr11:33719653-33722286	0	0.27386	inf
VSX1	chr20:25051520-25063015	0	0.274019	inf
RHBG	chr1:156338979-156355013	0	0.27414	inf
SLC6A19	chr5:1201709-1225230	0	0.277784	inf
ASB4	chr7:95115212-95169543	0	0.279087	inf
SIGLECP3	chr19:51670584-51676780	0	0.279644	inf
BCL2L10	chr15:52401821-52404972	0	0.280407	inf
RBMXL2	chr11:7110164-7112379	0	0.281884	inf
LOC399715	chr10:6319649-6377937	0	0.284216	inf
GRK7	chr3:141497042-141535892	0	0.286526	inf
ANXA8L1	chr10:48255224-48271368	0	0.288081	inf
TRPC5	chrX:111017541-111326004	0	0.289285	inf
IGSF21	chr1:18434239-18704977	0	0.289899	inf
SSX6	chrX:47967366-47980068	0	0.29279	inf
C12orf69	chr12:14956505-14976791	0	0.298472	inf
LOC151174	chr2:239133753-239140318	0	0.298706	inf
PRND	chr20:4702555-4709106	0	0.299286	inf
NTNG1	chr1:107682628-108024475	0	0.299606	inf
OR5B2	chr11:58189737-58190786	0	0.301014	inf
RAPSN	chr11:47459307-47470730	0	0.301313	inf
C4orf44	chr4:3250766-3258342	0	0.30152	inf
IL26	chr12:68595128-68619571	0	0.30174	inf
KLHL33	chr14:20896969-20903801	0	0.304171	inf
CLEC17A	chr19:14693895-14721956	0	0.306928	inf
NPY5R	chr4:164265090-164273086	0	0.307914	inf
TPTEP1	chr22:17082800-17129720	0	0.309612	inf
C1QTNF9	chr13:24883715-24896669	0	0.311169	inf
LRRC18	chr10:49893517-50191001	0	0.312494	inf
PLCXD3	chr5:41307047-41510730	0	0.31605	inf
FAM71D	chr14:67656109-67695267	0	0.318294	inf
LOC254100	chr11:65336690-65337884	0	0.320382	inf
UBAP1L	chr15:65385341-65398697	0	0.3221	inf
RNF175	chr4:154631311-154681387	0	0.324057	inf
FCRL1	chr1:157764193-157789940	0	0.326118	inf
CA14	chr1:150230217-150237480	0	0.328533	inf
TXNDC3	chr7:37888198-37940002	0	0.328725	inf
CLEC19A	chr16:19297104-19322269	0	0.329778	inf
GUCA2B	chr1:42619091-42621495	0	0.329877	inf
IGLL1	chr22:23915312-23922495	0	0.331406	inf
MMP21	chr10:127455026-127464390	0	0.331904	inf
LRRC7	chr1:70225857-70589171	0	0.332118	inf
GRAPL	chr17:19030781-19062148	0	0.333957	inf
SPNS3	chr17:4337218-4391499	0	0.336065	inf
LOC100131096	chr17:76000317-76107880	0	0.336968	inf
OR13C2	chr9:107366951-107367908	0	0.338474	inf
CRIP3	chr6:43265997-43276530	0	0.338933	inf
CES1P1	chr16:55794510-55808826	0	0.339092	inf
VPREB3	chr22:24094929-24096630	0	0.340653	inf
OR2AG2	chr11:6789237-6790188	0	0.341244	inf
BLK	chr8:11351520-11422108	0	0.342802	inf
OR1Q1	chr9:125377016-125377961	0	0.344059	inf
SLC17A8	chr12:100750856-100815837	0	0.346057	inf
LOC619207	chr10:135267431-135281953	0	0.347064	inf
WNT10A	chr2:219745254-219758651	0	0.34797	inf
GDPD4	chr11:76927602-76998463	0	0.351242	inf
CSRP3	chr11:19203577-19223589	0	0.352657	inf
LOC100131434	chrX:148609131-148621312	0	0.352711	inf
NRTN	chr19:5823817-5828335	0	0.352916	inf
TCEAL2	chrX:101380659-101382684	0	0.354115	inf
RNF133	chr7:121958477-122526813	0	0.357382	inf
DLG2	chr11:83166055-85338314	0	0.363764	inf
PAX5	chr9:36838530-37034476	0	0.364513	inf
TMEM100	chr17:53796987-53809482	0	0.366232	inf
KLRF1	chr12:9980076-9997603	0	0.366799	inf
ZNF705A	chr12:8325149-8332642	0	0.369084	inf
ATP13A4	chr3:193119865-193272696	0	0.370125	inf
HRASLS	chr3:192958917-192988644	0	0.370473	inf
LOC100129138	chr1:104615644-104619693	0	0.37864	inf
ANKRD20A2,ANKRD20A3	chr9:43089971-43133544	0	0.379888	inf
CACNA2D3	chr3:54156692-55108584	0	0.379971	inf
BTNL9	chr5:180467224-180488523	0	0.381171	inf
CASP12	chr11:104756444-104769397	0	0.382781	inf
CALCR	chr7:93053798-93204042	0	0.387252	inf
RIPPLY1	chrX:106143292-106174091	0	0.387634	inf
FAM86FP	chr12:8383644-8395542	0	0.389901	inf
ZNF726	chr19:24097683-24116769	0	0.394046	inf
C17orf108	chr17:26205339-26220409	0	0.39615	inf
PNMA6A,PNMA6C,PNMA6D	chrX:152240726-152243402	0	0.396756	inf
C20orf197	chr20:58630979-58648008	0	0.398082	inf
CLEC1A	chr12:10223079-10251605	0	0.400671	inf
ZYG11A	chr1:53308182-53360247	0	0.401265	inf
TLR10	chr4:38773859-38784611	0	0.402003	inf
USH2A	chr1:215796235-216596738	0	0.40217	inf
OR1N2	chr9:125315448-125316441	0	0.403446	inf
C2orf65	chr2:74785009-74875164	0	0.403536	inf
C3orf35	chr3:37440967-37476988	0	0.403742	inf
ARL9	chr4:57371374-57390058	0	0.404717	inf
ACCN1	chr17:31340105-32483825	0	0.404844	inf
CD300LG	chr17:41924515-41940997	0	0.404966	inf
CYP2A13	chr19:41594355-41602100	0	0.405607	inf
ASB12	chrX:63444071-63450511	0	0.407237	inf
AQP4	chr18:24432007-24765302	0	0.408168	inf
ZNF853	chr7:6655526-6663921	0	0.409555	inf
CADM3	chr1:159141376-159172932	0	0.411884	inf
TRIM61	chr4:165875597-165898818	0	0.413281	inf
MRPL42P5	chr15:40824082-40824749	0	0.417721	inf
SEBOX	chr17:26691289-26692265	0	0.419589	inf
TCAP	chr17:37821598-37822807	0	0.419687	inf
ZNF804A	chr2:185463092-185804214	0	0.42009	inf
UBE2Q2P1	chr15:85070426-85123412	0	0.420863	inf
TMPRSS9	chr19:2389783-2427875	0	0.422347	inf
LOC389634	chr12:8509559-8543348	0	0.423376	inf
MT1DP	chr16:56677598-56678853	0	0.423443	inf
PGA5	chr11:61008643-61018929	0	0.424009	inf
SELE	chr1:169691780-169703220	0	0.427609	inf
LOC100506012	chr19:46984044-47104457	0	0.427932	inf
OR1E1	chr17:3300759-3301704	0	0.430074	inf
GHRL	chr3:10327433-10335133	0	0.434827	inf
CYP46A1	chr14:100150754-100193638	0	0.437387	inf
MYL3	chr3:46899356-46904973	0	0.439749	inf
OR2D2	chr11:6912804-6913731	0	0.440989	inf
C2orf40	chr2:106682112-106694609	0	0.443449	inf
ASAH2B	chr10:52499707-52514569	0	0.453013	inf
CHRDL1	chrX:109917083-110039286	0	0.453384	inf
AMHR2	chr12:53817638-53825318	0	0.456259	inf
MAPK4	chr18:48086483-48258196	0	0.456884	inf
RBPMS2	chr15:65032094-65067770	0	0.457825	inf
ARMC12	chr6:35704858-35716685	0	0.460322	inf
YJEFN3	chr19:19639669-19648393	0	0.460951	inf
FAM65C	chr20:49202646-49253426	0	0.461859	inf
SPDYE1	chr7:43966034-44058748	0	0.462941	inf
KIR3DL2	chr19:55361897-55378670	0	0.464432	inf
ATP1A2	chr1:160085519-160113374	0	0.465648	inf
FLJ42875	chr1:2976180-2984289	0	0.466526	inf
PDE6H	chr12:15125955-15134799	0	0.472774	inf
STK33	chr11:8413417-8615503	0	0.47747	inf
UGT2A2	chr4:70454134-70518967	0	0.478885	inf
STAP1	chr4:68424445-68472616	0	0.483701	inf
ECRP	chr14:21387499-21388335	0	0.484595	inf
COL19A1	chr6:70576447-70922157	0	0.485308	inf
TECTB	chr10:114043492-114063070	0	0.486016	inf
RFPL1	chr22:29833003-29838444	0	0.489377	inf
GABRG3	chr15:27216428-27778373	0	0.490282	inf
MEOX2	chr7:15650836-15726308	0	0.493873	inf
IGFN1	chr1:201159952-201198080	0	0.496458	inf
FOLR3	chr11:71846770-71850934	0	0.498638	inf
C21orf37	chr21:18811207-18821503	0	0.501183	inf
IHH	chr2:219919141-219925238	0	0.506038	inf
SAP25	chr7:100169852-100171270	0	0.506716	inf
SERPINE3	chr13:51915167-52027275	0	0.51138	inf
H2BFXP	chrX:103139054-103401708	0	0.51169	inf
LOC100506540	chr11:18621350-18656020	0	0.513058	inf
FAM180A	chr7:135414345-135433594	0	0.513634	inf
MYOM2	chr8:1993157-2093380	0	0.522026	inf
C16orf96	chr16:4606490-4650318	0	0.52645	inf
ANKS1B	chr12:99039077-100378432	0	0.530661	inf
CLEC12B	chr12:10163230-10171399	0	0.530998	inf
ANKRD1	chr10:92671856-92681032	0	0.534276	inf
C17orf66	chr17:34181959-34195895	0	0.535801	inf
LURAP1	chr1:46654352-46686928	0	0.536868	inf
HCP5	chr6_ssto_hap7:2761726-2764356	0	0.538976	inf
RIC3	chr11:8060179-8190590	0	0.54556	inf
KRTAP5-6	chr11:1490684-1785501	0	0.546695	inf
SCRG1	chr4:174309298-174320617	0	0.54772	inf
KRTAP5-7	chr11:71238312-71239210	0	0.551746	inf
ZNF491	chr19:11909390-11919306	0	0.552255	inf
PRSS50	chr3:46753605-46759373	0	0.553948	inf
VSIG2	chr11:124617369-124622109	0	0.554039	inf
FAM110B	chr8:58907112-59062277	0	0.557685	inf
COX6A2	chr16:31439051-31439749	0	0.562239	inf
LRAT	chr4:155665162-155674270	0	0.562563	inf
C2orf88	chr2:191002485-191068210	0	0.568015	inf
ULK4P2	chr15:32698800-32727250	0	0.570186	inf
TSLP	chr5:110405777-110413722	0	0.57043	inf
CASQ1	chr1:160160284-160171676	0	0.575134	inf
FAM106A	chr17:18427879-18430160	0	0.576053	inf
POU2AF1	chr11:111222980-111250157	0	0.578131	inf
OR1E2	chr17:3336163-3337135	0	0.58055	inf
RHOXF1	chrX:119243024-119249847	0	0.582168	inf
LYPD2	chr8:143831627-143833952	0	0.593341	inf
BMP10	chr2:69092612-69098649	0	0.595214	inf
MORN3	chr12:122089292-122107560	0	0.598766	inf
TRPM3	chr9:73149965-73736514	0	0.599739	inf
NGF	chr1:115828536-115880857	0	0.602027	inf
NRN1L	chr16:67918780-67920271	0	0.602563	inf
SLCO5A1	chr8:70584567-70747299	0	0.606518	inf
DAB1	chr1:57463578-58716211	0	0.609064	inf
CDH19	chr18:64171320-64271216	0	0.611372	inf
TNXB	chr6_ssto_hap7:3306068-3368931	0.728371	11.6558	inf
ZHX1-C8ORF76	chr8:124232195-124287781	6.52e-108	1.44099	356.59
PCDHA13	chr5:140165875-140391929	5.18e-80	0.651244	262.762
C1QTNF3	chr5:33987090-34124633	4.03e-78	0.24202	255.054
MEF2B	chr19:19256375-19314238	6.28e-63	0.313304	204.955
MIA	chr19:41281081-41314346	6.17e-46	3.50654	151.993
AS3MT	chr10:104613966-104661655	1.05e-13	8.65662	46.2275
TEN1-CDK3	chr17:73937588-74002080	5.7e-15	0.313418	45.6431
UGT1A3	chr2:234526290-234681951	1.07e-11	2.73506	37.8893
UGT1A8	chr2:234526290-234681951	4.73e-12	0.994972	37.6154
UGT1A7	chr2:234526290-234681951	1.31e-11	1.65843	36.8846
UGT1A5	chr2:234526290-234681951	1.07e-11	0.328207	34.8304
HEATR8	chr1:55107426-55208328	1.01e-08	2.34633	27.7947
ZNF559-ZNF177	chr19:9434447-9493293	5.07e-09	0.392456	26.205
CYP3A7-CYP3AP1	chr7:99282301-99332819	5.1e-06	7.86211	20.5552
CCL14-CCL15,CCL15	chr17:34310691-34329084	3.85e-05	3.72549	16.5621
CYP21A2	chr6_ssto_hap7:3306068-3368931	0.793889	24.5016	13.4591
FSBP	chr8:95384187-95487343	0.00011301	0.292132	11.336
AGMO	chr7:15239942-15601640	0.0266825	34.5025	10.3366
GLYAT	chr11:58476229-58499447	0.0665908	83.459	10.2915
MASP2	chr1:11086579-11107296	0.0269208	27.8552	10.015
GNMT	chr6:42928499-42946981	0.0707531	55.5467	9.61669
UGT3A1	chr5:35953190-36001130	0.0226428	17.3068	9.57807
PIK3C2G	chr12:18414473-18801352	0.0260475	19.3091	9.53392
TTR	chr18:29171729-29178986	10.8375	7839.34	9.49856
ANXA10	chr4:169013687-169108893	0.0489673	31.7544	9.34092
SPP2	chr2:234959345-234985776	0.300285	192.601	9.32507
UPB1	chr22:24891250-24922553	0.195386	119.68	9.25865
OSTalpha	chr3:195943382-195960301	0.0973021	54.1491	9.12025
CYP4F2	chr19:15988833-16008884	0.0843412	42.0488	8.96161
AKR1D1	chr7:137761177-137803050	0.0966727	48.0976	8.95864
HAO1	chr20:7863630-7921093	0.196985	97.5416	8.95179
APOA2	chr1:161192082-161193418	21.3418	10408.5	8.92986
UGT2B10	chr4_ctg9_hap1:582545-587974	0.474609	229.565	8.91795
CCL3L1,CCL3L3	chr17:34623841-34625730	0.00949743	5.64397	8.82043
F13B	chr1:197008320-197036397	0.210861	90.2379	8.7413
GSTA1	chr6:52656177-52668664	1.84943	776.127	8.71307
GAS2	chr11:22688159-22834547	0.0666736	26.9151	8.65708
SLC22A10	chr11:63014620-63330855	0.0255621	10.2743	8.65081
APOF	chr12:56754354-56756583	0.204608	81.5071	8.63792
UGT2B7	chr4:69962192-69978705	0.829665	329.815	8.63491
ANGPTL3	chr1:62920396-63153969	1.04142	411.437	8.62597
ACMSD	chr2:135596185-135676176	0.174893	68.9024	8.62193
IGJ	chr4:71521257-71532348	1.01054	392.788	8.60248
HRG	chr3:186383797-186396023	3.68049	1349.86	8.51869
PON3	chr7:94989183-95025687	0.618261	223.48	8.49771
LECT2	chr5:135282599-135290723	0.350067	121.724	8.44176
APOC4	chr19:45445494-45452822	0.352274	122.265	8.4391
UGT1A9	chr2:234526290-234681951	0.0560038	19.0132	8.40726
GSTA2	chr6:52614884-52628361	1.10301	371.229	8.39472
CDO1	chr5:115140429-115152405	0.129352	43.4131	8.39069
TF	chr3:133464976-133497850	9.73767	3128.24	8.32756
SERPINA4	chr14:95027782-95036243	0.750864	240.943	8.32593
ARG1	chr6:131894343-131949363	0.527917	167.373	8.30854
CYP2C8	chr10:96796528-96829254	1.27047	401.962	8.30555
LOC100507203	chr6:131148544-131158276	0.104918	32.6906	8.28346
SLC22A1	chr6:160542862-160579750	0.570675	176.322	8.27133
PON1	chr7:94927668-94953884	1.13805	348.154	8.25702
BAAT	chr9:104122698-104147287	0.480425	144.139	8.22893
APOH	chr17:64208146-64225556	6.97661	2063.58	8.20841
ADH4	chr4:100010007-100222513	1.88044	549.807	8.19171
RGN	chrX:46937774-46952712	0.215431	62.6281	8.18344
PLA2G12B	chr10:74694937-74714510	0.0688144	19.8915	8.17523
SLC22A9	chr11:63014620-63330855	0.0288126	8.28977	8.16849
TAT	chr16:71600753-71610998	0.948843	270.938	8.15758
PGLYRP2	chr19:15579456-15590315	0.181012	51.3752	8.14884
PAH	chr12:103232103-103311381	0.660217	185.995	8.13811
CYP2A6	chr19:41349442-41356352	1.28498	358.236	8.12302
CFHR2	chr1:196912933-196928356	3.0141	835.511	8.11479
SERPINA7	chrX:105277189-105282718	0.436797	116.191	8.05532
ADH1C	chr4:100257648-100273917	1.58249	415.669	8.03709
AADAC	chr3:151347319-151546276	0.303558	79.0805	8.02521
CD302	chr2:160625138-160761267	0.045903	11.8381	8.01064
LPA	chr6:160952514-161087407	0.163342	41.7349	7.99721
MBL2	chr10:54525139-54531460	0.0359526	9.18374	7.99684
SLC25A47	chr14:100789678-100796715	0.0794693	20.2702	7.99474
ABCG5	chr2:44039610-44065958	0.0955235	24.3052	7.99119
SLC38A3	chr3:50242691-50258406	0.619732	157.587	7.99029
BBOX1	chr11:27062508-27149354	0.036094	9.11183	7.97984
AFM	chr4:74347461-74369718	1.48915	372.674	7.96728
APOC3	chr11:116700623-116703787	36.1369	9031.3	7.96532
GLYATL1	chr11:58695101-58825925	0.305038	75.8477	7.95797
SCHIP1	chr3:158787040-159615155	0.00711437	1.72368	7.92054
MYBPC1	chr12:101988708-102079658	0.0170088	4.09898	7.91284
SRD5A2	chr2:31749655-31806040	0.0270416	6.45981	7.90017
HGD	chr3:120347014-120401418	0.369589	88.0601	7.89642
F11	chr4:187187117-187422212	0.216532	51.3481	7.88958
KNG1	chr3:186435097-186462199	3.06483	726.031	7.88808
SLC17A4	chr6:25754926-25781403	0.0534348	12.6321	7.8851
UROC1	chr3:126200007-126236616	0.0395341	9.31985	7.88106
CPB2	chr13:46626982-46679211	1.32221	310.889	7.8773
SERPIND1	chr22:21061978-21213100	1.98415	465.308	7.87352
SLC2A2	chr3:170714136-170744768	0.878966	205.108	7.86636
ACTA1	chr1:229566992-229569843	0.0944803	22.042	7.86603
HMGCS2	chr1:120290618-120311555	1.13513	263.881	7.86088
SERPINA11	chr14:94908800-94919122	0.720461	165.914	7.8473
CFHR1	chr1:196788860-196801319	21.8033	4916.32	7.81689
PLG	chr6:161123224-161175085	3.99289	894.462	7.80744
HSD17B13	chr4:88224940-88244056	0.553243	122.734	7.79341
ALDOB	chr9:104182841-104198062	9.13682	1997.08	7.77198
SLC17A2	chr6:25912983-25930946	0.111674	24.3579	7.76896
AHSG	chr3:186330849-186339107	5.59693	1217.17	7.76468
DMGDH	chr5:78293428-78365449	0.462521	98.5508	7.73521
BHMT	chr5:78407603-78428113	0.818102	173.528	7.72867
FMO5	chr1:146655883-146697230	0.61337	129.527	7.72228
PKLR	chr1:155247373-155271225	0.0857955	18.0718	7.71862
SLC1A2	chr11:35272751-35441610	0.0158119	3.3067	7.70824
AKR1C4	chr10:5238797-5260910	1.48231	308.454	7.70107
ABCG8	chr2:44066102-44105605	0.295347	60.9637	7.68939
NR1H4	chr12:100867550-100957645	0.257383	53.1042	7.68876
CYP4A11	chr1:47394845-47407156	0.851496	172.691	7.66398
WDR72	chr15:53805937-54051859	0.0509854	10.3123	7.66006
TTC36	chr11:118398209-118401740	0.130215	26.3099	7.65856
UGT1A1	chr2:234526290-234681951	0.342034	68.9118	7.65447
MTTP	chr4:100485239-100545154	0.482318	95.3772	7.62752
SLC28A1	chr15:85427912-85489027	0.166639	32.7636	7.61922
SERPINC1	chr1:173872941-173886516	6.40699	1249.78	7.60781
APOB	chr2:21224300-21266945	6.03377	1156.8	7.58286
CYP3A4	chr7:99354582-99381811	3.97842	762.654	7.58269
NR1I3	chr1:161195832-161208000	0.138416	26.3787	7.57422
CPS1	chr2:211342405-211543831	4.53421	852.4	7.55454
DIO1	chr1:54359860-54376759	0.25045	46.6683	7.54177
DMRTA1	chr9:22446839-22452472	0.057791	10.7447	7.53856
G6PC	chr17:41052814-41065386	0.586006	108.929	7.53826
SLC10A1	chr14:70242551-70264006	0.425992	78.9652	7.53425
ACSM5	chr16:20420855-20452281	0.684019	126.118	7.52653
GBA3	chr4:22694547-22821192	0.298169	54.863	7.52356
FETUB	chr3:186358148-186370797	0.427199	77.9908	7.51225
AMBP	chr9:116822407-116840752	15.4536	2813.04	7.50805
APOA1	chr11:116706468-116708338	26.9109	4867.58	7.49887
HPR	chr16:72097124-72111145	3.64265	656.967	7.49469
ACSM2A	chr16:20462858-20498991	0.592222	106.807	7.49466
LEAP2	chr5:132209357-132210582	1.22788	220.041	7.48547
ADH1A	chr4:100010007-100222513	3.80261	679.381	7.48109
SULT2A1	chr19:48373722-48389654	0.816849	145.846	7.48016
RBP4	chr10:95351592-95360993	23.3356	4143.22	7.47208
IGFALS	chr16:1840413-1844909	0.261622	46.3706	7.46958
ADH1B	chr4:100227526-100242572	6.62394	1159.74	7.45189
HGFAC	chr4:3443725-3451213	0.132331	23.094	7.44723
NDST3	chr4:118955499-119179789	0.0105171	1.83431	7.44636
GPLD1	chr6:24428404-24489850	0.165805	28.8859	7.44474
KLKB1	chr4:187148671-187179625	0.623239	107.554	7.43106
ATP2B2	chr3:10365706-10547268	0.0349933	5.83205	7.38078
FOLH1B	chr11:89392464-89431886	0.0685742	11.3979	7.37688
ABCC6P1	chr16:18582569-18609607	0.0480664	7.98706	7.37649
GC	chr4:72607410-72671237	10.9517	1811.84	7.37015
CYP1A2	chr15:75041183-75048941	0.662589	107.897	7.34733
ABCA8	chr17:66863430-66951533	0.0657052	10.6527	7.341
UGT2B4	chr4:70345882-70361626	1.27772	206.752	7.33819
ITIH2	chr10:7745235-7791483	8.35292	1349.78	7.33622
BHMT2	chr5:78365546-78385897	0.495078	79.8712	7.33387
PRAP1	chr10:135160843-135166187	1.07463	173.008	7.33086
DBH	chr9:136501484-136524466	0.0236931	3.81395	7.33067
HPD	chr12:122277432-122326517	7.24145	1154.14	7.31632
CLEC4G	chr19:7793842-7797057	0.0543867	8.59801	7.3046
SLC6A1	chr3:11034419-11080935	0.112714	17.759	7.29973
MAT1A	chr10:82031575-82049434	1.90958	298.477	7.28822
FTCD	chr21:47556175-47575481	1.16127	179.682	7.2736
ACOT12	chr5:80256507-81047072	0.135988	20.8722	7.26196
F7	chr13:113760104-113774995	0.127198	19.3326	7.24782
HPN	chr19:35531409-35597208	0.461011	69.8448	7.24321
ACSM2B	chr16:20548082-20587695	0.770648	116.625	7.24159
KLF15	chr3:126061477-126076236	0.0261046	3.87706	7.21451
ITIH1	chr3:52811601-52826084	3.76302	555.565	7.20592
CFHR5	chr1:196946666-196978803	0.276915	40.6688	7.19833
AMDHD1	chr12:96337070-96362370	0.15697	22.8925	7.18824
FOXP2	chr7:113726364-114333827	0.0291176	4.22168	7.17978
SLC22A7	chr6:43265997-43276530	0.206203	29.8409	7.17708
MZB1	chr5:138723256-138725605	0.0986668	14.169	7.16596
HEPACAM	chr11:124789145-124806308	0.0181059	2.59451	7.16286
AGXT	chr2:241808161-241818536	2.61699	372.042	7.15141
C8B	chr1:57394882-57431688	3.37628	477.572	7.14414
OTC	chrX:38211735-38280703	1.01095	142.638	7.14051
C8A	chr1:57320442-57383894	2.40992	335.812	7.12252
ABCB11	chr2:169779448-169887833	0.436288	60.7396	7.12121
SERPINA6	chr14:94770584-94789688	2.92889	407.262	7.11946
SEPP1	chr5:42756919-42812024	4.77054	660.861	7.11405
C6	chr5:41142335-41261540	1.63577	223.948	7.09705
MASP1	chr3:186933872-187009810	0.255296	34.8217	7.09167
CYP2C9	chr10:96698414-96749148	6.77888	904.755	7.06034
PRG4	chr1:185703682-186446655	2.19949	291.732	7.05133
ASGR1	chr17:7076750-7082883	0.468596	61.5054	7.03622
F9	chrX:138612894-138645617	0.536091	70.2464	7.0338
SHBG	chr17:7494547-7536700	0.420973	54.9172	7.02739
F8A3	chrX:154611748-154613450	0.0021185	0.276029	7.02563
HPX	chr11:6452267-6462254	17.9506	2327.78	7.01878
DAO	chr12:109273856-109294710	0.174719	22.6481	7.01821
THRSP	chr11:77726760-77791265	0.125063	16.1871	7.01604
SERPINA5	chr14:95047730-95059457	0.517637	66.8187	7.01217
ADH6	chr4:100010007-100222513	0.967314	122.77	6.98776
GLDC	chr9:6532463-6645692	0.218081	27.6261	6.98502
RBP5	chr12:7276279-7281466	0.416321	52.4858	6.97809
VTN	chr17:26694298-26697373	8.87043	1116.66	6.97597
CRHBP	chr5:76248679-76265299	0.185811	23.3579	6.97393
C4BPA	chr1:207277606-207318317	2.82498	354.928	6.97314
RDH16	chr12:57345215-57351418	0.679972	85.1517	6.96842
FCN2	chr9:137772657-137779366	0.215036	26.833	6.96329
OIT3	chr10:74653338-74692787	0.0843019	10.4489	6.95357
AOX1	chr2:201450730-201536217	3.33506	408.529	6.93658
UGT1A4	chr2:234526290-234681951	0.617184	75.5955	6.93646
ITIH4	chr3:52847005-52864717	4.01564	491.151	6.93439
CFHR3	chr1:196743929-196763203	3.17475	386.742	6.92858
F2	chr11:46740742-46761056	4.63666	562.74	6.92324
ABCC2	chr10:101542462-101611662	0.660705	79.5195	6.91116
GCGR	chr17:79762009-79771889	0.262786	31.3243	6.89725
ADRA1A	chr8:26605666-26722922	0.160909	19.1794	6.89717
CYP7A1	chr8:59402736-59412720	0.181347	21.5873	6.89529
CPN2	chr3:194060493-194072057	0.257219	30.3398	6.88207
INS-IGF2	chr11:2150341-2182439	0.392094	46.1299	6.87836
CES1	chr16:55836763-55867075	4.83897	560.363	6.85552
APOC2	chr19:45445494-45452822	79.0709	9135.66	6.85222
CFHR4	chr1:196857143-196887843	0.636627	73.3615	6.84843
KLB	chr4:39408472-39453153	0.0514016	5.8913	6.84063
GATM	chr15:45653321-45672321	3.30625	375.237	6.82646
HSD17B6	chr12:57157107-57181574	2.37207	267.038	6.81476
SCN8A	chr12:51985019-52206648	0.016115	1.81274	6.81363
C3P1	chr19:10152031-10184813	0.101958	11.4161	6.80695
SNX29P2	chr16:29313607-29376380	0.264184	29.5102	6.80352
ARRDC5	chr19:4890448-4902879	0.0423895	4.7128	6.79673
ODZ1	chrX:123509755-124097666	0.0333025	3.68662	6.79052
TIMD4	chr5:156346292-156390266	0.112771	12.4533	6.787
CPN1	chr10:101802064-101841642	0.195706	21.3497	6.76939
C1orf151-NBL1	chr1:19923470-19984949	0.00456527	0.497765	6.76862
FGG	chr4:155525285-155533902	24.2823	2646.26	6.7679
A1CF	chr10:52559168-52645435	0.153102	16.5408	6.75539
HAL	chr12:96367141-96390071	0.103104	11.0495	6.74373
FCRL5	chr1:157483166-157522310	0.0233213	2.49342	6.74033
CYP2E1	chr10:135340866-135352620	8.22535	872.809	6.72945
DPYS	chr8:105391651-105479277	1.48557	157.401	6.72728
APOA5	chr11:116660085-116663136	0.498719	52.6139	6.72107
ASGR2	chr17:7004640-7018130	1.04813	110.438	6.71927
AZGP1	chr7:99564349-99573735	3.56277	374.819	6.71705
CYP2B6	chr19:41497203-41524301	0.510084	53.6547	6.71683
CYP8B1	chr3:42913683-42917633	0.32284	33.9068	6.71461
FMO3	chr1:171060017-171086959	2.09588	219.843	6.71277
SLC15A1	chr13:99336054-99404929	0.0414118	4.30041	6.69829
LPAL2	chr6:160887586-160932156	0.0688002	7.08369	6.68595
GHR	chr5:42423876-42721980	1.58821	163.192	6.68302
PLIN4	chr19:4472254-4517716	0.0294639	3.01802	6.67851
H19	chr11:2016405-2019065	14.9537	1527.5	6.67452
HAO2	chr1:119911401-119936751	0.669759	67.5609	6.6564
FGB	chr4:155484131-155493915	25.6855	2569.09	6.64416
PFKFB1	chrX:54959589-55020511	0.198673	19.816	6.64013
ZG16	chr16:29789560-29792969	0.0757727	7.47862	6.62495
SLC38A4	chr12:47158543-47219780	1.09589	107.501	6.6161
A1BG	chr19:58858171-58874214	6.41662	627.022	6.61056
ALDH8A1	chr6:135238527-135271260	0.35847	34.3737	6.58331
SLC27A5	chr19:59009699-59023432	0.785353	74.7249	6.5721
SAA4	chr11:18252901-18270221	2.72035	258.327	6.56926
TDO2	chr4:156824844-156841558	2.10789	199.425	6.56391
RANBP3L	chr5:36249103-36302011	0.0258954	2.38174	6.52318
CCL16	chr17:34303534-34308523	0.188223	17.3104	6.52305
C9	chr5:39284377-39364655	2.45873	225.519	6.51919
APOM	chr6_ssto_hap7:2937601-2956785	3.93951	361.133	6.51837
ABAT	chr16:8768443-8878432	0.891386	81.7008	6.51816
ITIH3	chr3:52828783-52843025	4.57244	419.074	6.5181
CD5L	chr1:157800703-157811634	0.149124	13.6618	6.51749
SLC7A2	chr8:17354596-17428077	0.229616	20.8364	6.50374
PROC	chr2:128175995-128186822	1.11767	101.185	6.50035
CHRM2	chr7:136553398-136849088	0.0277549	2.47998	6.48144
ZNF385B	chr2:180306710-180726232	0.0392669	3.50679	6.48069
PIPOX	chr17:27369917-27384236	1.04302	92.3106	6.46765
RDH5	chr12:56109817-56118526	0.232121	20.5251	6.46637
BCHE	chr3:165490691-165555253	0.297191	26.1528	6.45943
TARP	chr7:38299243-38313248	0.0743306	6.49313	6.44881
LIPC	chr15:58724174-58861073	1.34627	116.558	6.43594
AR	chrX:66763873-66950461	0.109692	9.47196	6.43213
HYAL1	chr3:50337319-50349812	0.288496	24.781	6.42454
SERPINF2	chr17:1646129-1658559	3.85933	329.347	6.41511
ADHFE1	chr8:67344717-67381044	0.179502	15.2541	6.40905
PAPPA2	chr1:176432306-176811970	0.0435615	3.69605	6.40679
HFE2	chr1:145413190-145417545	0.672774	56.6856	6.39672
GPD1	chr12:50497800-50505095	0.203938	17.0374	6.38443
GAMT	chr19:1397024-1401569	0.81485	67.4358	6.37084
ABCA10	chr17:67144147-67323323	0.0295699	2.43538	6.36387
GPM6A	chr4:176554087-176923648	0.0219801	1.80407	6.35891
GYS2	chr12:21689122-21757781	0.454749	36.8342	6.33983
ZBTB16	chr11:113930430-114121397	0.710869	57.47	6.33708
CYP4A22	chr1:47603106-47614526	0.415136	33.5149	6.33508
AKR1C2	chr10:5029967-5060225	0.568103	45.5221	6.32427
APOC1P1	chr19:45430059-45434643	0.430163	34.3499	6.31928
FGA	chr4:155504279-155511897	51.7084	4082.31	6.30284
DNASE1L3	chr3:58178352-58196730	0.841138	65.6388	6.28606
C3	chr19:6677845-6720662	77.2145	5992.67	6.27818
ABCA6	chr17:67074846-67138015	0.462731	35.5011	6.26155
MYH7	chr14:23881946-23904870	0.0518348	3.96064	6.25567
NAT8	chr2:73867849-73869537	0.0703402	5.33934	6.24617
RGS7BP	chr5:63802451-63908121	0.0167429	1.26909	6.24411
ELOVL2	chr6:10980992-11079377	0.0625089	4.70551	6.23415
C5	chr9:123714613-123812554	2.25107	169.055	6.23074
MYLPF	chr16:30386122-30389310	0.137336	10.3004	6.22885
PDE11A	chr2:178487976-178973066	0.0732592	5.46101	6.22001
TMPRSS6	chr22:37461478-37499693	0.648334	48.0115	6.2105
ABCC6	chr16:16243421-16317328	0.667745	49.3455	6.20748
ORM2	chr9:117092068-117095536	44.8298	3288.28	6.19673
FABP1	chr2:88422507-88427650	17.5492	1268.78	6.17589
PLGLB1,PLGLB2	chr2:88047605-88285309	0.0225673	1.62569	6.17068
BCO2	chr11:112046207-112089649	0.304419	21.8781	6.16728
SLC13A5	chr17:6588038-6616740	0.358607	25.4898	6.15137
FCN3	chr1:27695600-27701315	0.538906	38.2547	6.14946
CR1L	chr1:207818457-207897036	0.0743703	5.17668	6.12116
CHRNA4	chr20:61974661-61992748	0.068771	4.78097	6.11936
PKHD1	chr6:51480144-51952423	0.153465	10.6255	6.11348
SLC25A18	chr22:18043182-18073647	0.128865	8.86827	6.10472
PCDP1	chr2:120302024-120414237	0.0219023	1.50118	6.09887
FGL1	chr8:17721899-17753047	8.63798	588.926	6.09125
PLIN1	chr15:90207599-90222648	0.0225075	1.52615	6.08334
CLDN14	chr21:37832919-37948867	0.120556	8.14798	6.07867
CYP2A7	chr19:41381343-41388657	0.0315211	2.0958	6.05504
SERPINA10	chr14:94749649-94759596	1.59293	104.444	6.0349
PDZK1	chr1:145727665-145764206	0.449144	29.4229	6.03362
OGDHL	chr10:50942686-50970425	0.361265	23.6511	6.03271
HP	chr16:72088507-72094955	187.978	12297.1	6.03161
PBLD	chr10:70042416-70102953	1.37267	89.5696	6.02795
NRG1	chr8:31497267-32622558	0.0818267	5.33477	6.02671
UGT1A6	chr2:234526290-234681951	0.152752	9.90145	6.01837
ASPG	chr14:104552022-104579046	0.171631	11.0899	6.0138
PZP	chr12:9301435-9360966	1.56378	100.948	6.01244
SLCO1B1	chr12:21284127-21392730	1.96932	125.049	5.98865
SARDH	chr9:136528683-136605077	0.441717	28.0259	5.98749
AGT	chr1:230838271-230850336	4.66403	295.271	5.98432
COLEC10	chr8:120079423-120119202	0.283754	17.8577	5.97576
APCS	chr1:159557615-159558661	9.61163	599.451	5.96272
TMEM82	chr1:16068916-16074477	0.0462257	2.88215	5.96231
PHEX	chrX:22050920-22266478	0.0227883	1.41995	5.9614
C8orf80	chr8:27879480-27941388	0.197028	12.2408	5.95715
C19orf80	chr19:11309968-11373168	0.183794	11.2822	5.93982
ADAMTSL3	chr15:84322837-84708593	0.101598	6.21397	5.93457
STAB2	chr12:103981068-104160502	0.210587	12.8432	5.93044
ALDH1A1	chr9:75515577-75568233	5.68323	344.113	5.92003
HABP2	chr10:115310589-115423805	1.93603	116.543	5.91162
AGXT2L1	chr4:109663201-109684235	0.270274	16.1878	5.90434
TFR2	chr7:100218038-100239173	1.98661	118.876	5.90301
ODZ2	chr5:166711842-167691162	0.0319615	1.91104	5.90188
CDH26	chr20:58533470-58588168	0.0202468	1.19843	5.88731
FXYD1	chr19:35629731-35633954	1.42095	83.9361	5.88436
CYP2B7P1	chr19:41430169-41456565	0.0894953	5.22791	5.86828
PKHD1L1	chr8:110374705-110543500	0.00873454	0.507721	5.86116
ANG	chr14:21152335-21168758	39.8872	2304.11	5.85214
HLF	chr17:53342320-53402426	0.0895762	5.14971	5.84523
GNAO1	chr16:56225250-56391356	0.0603838	3.4645	5.84234
KCNAB1	chr3:155838336-156256927	0.017221	0.983503	5.83569
GCKR	chr2:27719705-27746550	0.580755	33.1149	5.83341
HOGA1	chr10:99344101-99372555	0.0266	1.50731	5.8244
ADCY10	chr1:167778624-167883453	0.0253771	1.40663	5.79257
CMYA5	chr5:78985658-79096049	0.071323	3.94848	5.79079
PPP1R1A	chr12:54973023-54982443	0.0372541	2.05129	5.78299
CUX2	chr12:111471827-111788358	0.0545624	2.99263	5.77736
NPC1L1	chr7:44552134-44580914	0.266466	14.6103	5.77689
PCK1	chr20:56136136-56141513	5.17553	278.084	5.74767
ACSS3	chr12:81471808-81649582	0.706097	37.9073	5.74647
MAOB	chrX:43625856-43741721	0.633412	33.9976	5.74615
CECR2	chr22:17956627-18033845	0.0889647	4.73355	5.73355
F10	chr13:113777112-113803843	1.82661	97.1833	5.73347
CP	chr3:148847370-148939832	3.74249	198.935	5.73216
INHBC	chr12:57828542-57844609	0.3058	16.2012	5.72737
C7	chr5:40909598-40983042	0.603218	31.4485	5.70417
CTNNA3	chr10:67679724-69455949	0.0203683	1.058	5.69888
SLC30A10	chr1:220046618-220321383	0.274186	14.1661	5.69114
ACADL	chr2:211052715-211090215	0.159039	8.17638	5.68401
C14orf105	chr14:57936594-57960576	0.0525049	2.69933	5.684
MYOM1	chr18:3066804-3220106	0.449575	23.0499	5.68006
PAQR9	chr3:142680073-142682178	0.0319092	1.62415	5.66957
GYG2	chrX:2746862-2800861	0.117269	5.92148	5.65806
ENPP7	chr17:77704881-77716021	0.0370708	1.84862	5.64003
CYP2C19	chr10:96522462-96612671	1.6784	82.7251	5.62317
GFRA1	chr10:117816441-118033126	0.0202825	0.996914	5.61916
ATRNL1	chr10:116853123-117708496	0.0283105	1.38125	5.6085
IGFBP2	chr2:217498126-217529158	1.49082	72.7157	5.60809
BMX	chrX:15518899-15574652	0.0261397	1.24932	5.57876
METTL7A	chr12:51318533-51326300	1.32931	63.1416	5.56984
BAI3	chr6:69345631-70099403	0.0222371	1.05042	5.56186
VNN3	chr6:133043925-133055904	0.160621	7.46859	5.5391
CFH	chr1:196621007-196716634	31.672	1465.27	5.53182
CYP2C18	chr10:96443250-96495947	0.812274	37.5529	5.53082
ST6GALNAC3	chr1:76540388-77096669	0.062598	2.88682	5.52722
CYP2D6	chr22:42522500-42526883	3.38346	154.681	5.51466
ORM1	chr9:117085302-117088759	228.561	10409.9	5.50923
KCND3	chr1:112318453-112531777	0.389344	17.7158	5.50784
APOC1	chr19:45417920-45422606	319.024	14407.2	5.49698
SALL1	chr16:51169885-51185183	0.574967	25.9606	5.4967
PALMD	chr1:100111430-100231349	0.586934	26.3445	5.48816
PPIAL4G	chr1:143767143-143767881	0.577468	25.8512	5.48435
GP1BA	chr17:4835591-4838325	0.0263788	1.17808	5.48092
ESR1	chr6:152011630-152424408	0.177905	7.94047	5.48004
CFP	chrX:47483611-47489704	0.174461	7.74993	5.47321
GPT	chr8:145729464-145732555	1.11891	49.6838	5.47261
SLC17A1	chr6:25783125-25832287	0.074096	3.27159	5.46445
EXOC3L4	chr14:103566480-103576894	0.0765242	3.36452	5.45834
NR0B2	chr1:27237974-27240567	0.228549	10.0372	5.45671
HAMP	chr19:35773409-35776045	24.0803	1053.96	5.45182
PRG2	chr11:57154833-57158130	0.094048	4.10993	5.44957
PAR5	chr15:25230006-25233379	0.0190924	0.832678	5.44669
C5orf4	chr5:154198051-154230213	0.195065	8.48545	5.44297
C8G	chr9:139839697-139841426	0.638413	27.707	5.43962
IGF1	chr12:102789644-102874378	0.428128	18.2811	5.41617
CYP2D7P1	chr22:42536213-42540575	0.494079	21.0904	5.4157
MST1	chr3:49721379-49726196	3.9614	168.697	5.41229
FAM198A	chr3:43020758-43099207	0.0374726	1.59537	5.41191
MCART6	chrX:103139054-103401708	0.0200644	0.854029	5.41158
DSCAM	chr21:41384342-42219039	0.00874413	0.372176	5.41153
IGFBP1	chr7:45927958-45933267	1.26104	53.6339	5.41046
DTX1	chr12:113495661-113535833	0.0392414	1.62996	5.37632
ONECUT1	chr15:53049352-53082209	0.317432	13.0074	5.35674
GOLGA6A	chr15:74362197-74374891	0.101816	4.16575	5.35454
SHANK2	chr11:70313960-70935808	0.1119	4.51832	5.3355
GPR128	chr3:100328432-100414323	0.164911	6.6574	5.3352
UGT2B15,UGT2B17	chr4_ctg9_hap1:224703-249081	6.90725	275.821	5.31948
SEMA6D	chr15:47476402-48066420	0.0295755	1.17811	5.31593
SGK2	chr20:42187634-42214273	0.142313	5.58335	5.29399
ZNF542	chr19:56879467-56891196	0.018862	0.735146	5.28448
PRCD	chr17:74523429-74541458	0.0677939	2.64129	5.28394
ABCB4	chr7:87031360-87105019	1.63337	63.6213	5.28359
ASPA	chr17:3377403-3402700	0.10621	4.11738	5.27673
C4BPB	chr1:207262211-207273337	2.92025	112.878	5.27253
ACTN2	chr1:236849769-236927558	0.0419346	1.61095	5.26363
HSD11B1	chr1:209859524-209908295	5.20942	199.437	5.25866
ETNK2	chr1:204100189-204121307	0.302133	11.5317	5.25428
CD79A	chr19:42381189-42385439	0.324783	12.3356	5.24721
CD28	chr2:204571197-204603636	0.0387199	1.46761	5.24425
MYO16	chr13:109248499-109860355	0.03621	1.3627	5.23393
NTN1	chr17:8924858-9147317	0.0210085	0.785175	5.22397
CPAMD8	chr19:17003761-17137625	0.0104424	0.390274	5.22396
ZNF429	chr19:21688436-21721079	0.0843019	3.123	5.21122
OSGIN1	chr16:83986826-83999937	0.909047	33.6701	5.21097
PNPLA3	chr22:44319618-44343448	0.838126	30.9722	5.20766
SLC6A12	chr12:299242-323371	0.326973	12.0376	5.20223
F5	chr1:169481191-169555769	3.85322	139.34	5.1764
MIA2	chr14:39703124-39722575	0.350272	12.6125	5.17024
XPNPEP2	chrX:128872945-128903525	0.096687	3.47388	5.16708
DDC	chr7:50526133-50633154	0.292613	10.4935	5.16435
NTRK3	chr15:88419987-88814297	0.0221178	0.781864	5.14364
CHST13	chr3:126243130-126262134	0.0384421	1.35793	5.14258
ZNF208	chr19:22148896-22193745	0.00679362	0.239776	5.14136
PPP1R3F	chrX:49126305-49144555	0.0265409	0.934746	5.13829
MLXIPL	chr7:73007523-73038870	0.531489	18.7036	5.13713
ACOX2	chr3:58490862-58522929	1.58394	55.3085	5.12591
SLC19A3	chr2:228549925-228582745	0.118817	4.12421	5.1173
LCAT	chr16:67973786-68002597	2.11878	73.3744	5.11397
SLC39A5	chr12:56623819-56652143	0.482468	16.6836	5.11186
SLC17A3	chr6:25845327-25874471	0.189313	6.54308	5.11113
REREP3	chr15:22546564-22570831	0.102527	3.52117	5.10198
A1BG-AS1	chr19:58858171-58874214	0.0314923	1.07952	5.09924
ANKRD35	chr1:145549208-145568526	0.0191531	0.656327	5.09877
ABCA4	chr1:94458393-94586705	0.00847844	0.290452	5.09836
KCNT2	chr1:196194912-196577499	0.148222	5.05606	5.09218
AFF3	chr2:100163715-100759037	0.068571	2.31641	5.07815
LAX1	chr1:203734283-203745480	0.207059	6.93869	5.06655
AKR1CL1	chr10:5196654-5227150	0.126167	4.22656	5.06608
HAAO	chr2:42994228-43019751	2.31411	77.2068	5.0602
TM6SF2	chr19:19375173-19384074	0.0951515	3.16419	5.05547
LEPR	chr1:65886130-66103176	2.07489	68.0124	5.03469
CCL14	chr17:34310691-34329084	5.82082	190.775	5.03451
MEG3	chr14:101292444-101327360	0.0437639	1.4339	5.03406
LBP	chr20:36974884-37005653	7.95193	259.844	5.0302
UGT2B28	chr4:70146216-70160768	0.0460473	1.48341	5.00966
P2RY14	chr3:150804675-151176497	0.0265298	0.854179	5.00885
KANK4	chr1:62701836-62785083	0.0114567	0.368723	5.00827
C10orf140	chr10:21802408-21814611	0.00944723	0.304034	5.0082
WNK3	chrX:54219255-54384438	0.05501	1.77028	5.00814
ATP2A1	chr16:28889808-28936532	0.18155	5.8252	5.00387
CDHR2	chr5:175969511-176022769	0.401722	12.8824	5.00306
ST8SIA1	chr12:22346324-22487648	0.0190376	0.606035	4.99248
AGTR1	chr3:148415657-148460790	0.3292	10.4736	4.99165
CBS	chr21:44473300-44496472	1.6925	53.5949	4.98486
KCNJ10	chr1:160007256-160040051	0.0592079	1.8564	4.97057
ACSL1	chr4:185676748-185747215	4.51764	141.266	4.96671
CHAD	chr17:48503518-48552200	0.122267	3.81108	4.9621
NR1I2	chr3:119499330-119537332	0.38162	11.7685	4.94665
CREB3L3	chr19:4153628-4173048	0.916351	27.7317	4.91949
CYP39A1	chr6:46517444-46620523	0.644977	19.428	4.91275
TCP10L	chr21:33947150-33957845	0.0242948	0.73171	4.91255
TM4SF4	chr3:149192367-149221181	5.37345	161.064	4.90564
TTN	chr2:179059207-179672150	0.337921	10.0305	4.89157
HPGD	chr4:175411327-175444049	0.621527	18.4395	4.89084
RTN4RL2	chr11:57228338-57244384	0.0575739	1.6757	4.86321
CLDN16	chr3:190105660-190129932	0.019717	0.573288	4.86175
LMOD3	chr3:69156038-69171746	0.0155226	0.451282	4.86159
PHYHD1	chr9:131683173-131704320	0.560929	16.2827	4.85938
TM4SF5	chr17:4675186-4686506	1.34792	39.0443	4.85631
ART4	chr12:14982244-14996413	0.574087	16.5981	4.8536
IGLL5	chr22:23229959-23238013	15.5742	447.383	4.84428
DMD	chrX:31137344-33357726	1.77137	50.8765	4.84406
LYNX1	chr8:143845755-143859640	0.0764096	2.17253	4.82948
CFI	chr4:110661847-110723335	10.3198	293.387	4.82932
ACACB	chr12:109577201-109706030	1.51466	42.605	4.81395
DARC	chr1:159173802-159176290	0.058752	1.64826	4.81016
KRT81	chr12:52679696-52685299	0.0355826	0.998067	4.80989
LOXHD1	chr18:44056934-44236996	0.00908004	0.254509	4.80888
SERPINA1	chr14:94843083-94857029	193.237	5413.71	4.80818
IGF2	chr11:2150341-2182439	0.146145	4.07634	4.8018
FAAH2	chrX:57313109-57515629	0.167808	4.67178	4.79909
NR5A2	chr1:199996769-200146550	0.337074	9.34005	4.79229
TMOD1	chr9:100263461-100436029	0.178144	4.93326	4.79143
SLC7A9	chr19:33321418-33360683	0.245691	6.79309	4.78915
CKM	chr19:45809670-45826233	0.167438	4.61032	4.78317
SMOC1	chr14:70346113-70499083	0.641033	17.6004	4.77906
SOX5	chr12:23685230-24715380	0.323419	8.87114	4.77764
CCL19	chr9:34689566-34691274	0.128824	3.48826	4.75904
AMT	chr3:49454210-49466757	0.530483	14.3062	4.75319
ANKRD55	chr5:55395506-55529186	0.0527808	1.39787	4.72708
PLA2G2D	chr1:20438433-20446008	0.399837	10.5372	4.71993
XIST	chrX:73012039-73072588	23.9762	629.295	4.71406
TMEM27	chrX:15645440-15683154	0.177028	4.64475	4.71355
THNSL2	chr2:88469813-88486156	0.0448153	1.17074	4.70729
EFCAB6	chr22:43924623-44208217	0.0276787	0.718704	4.69855
PCDHA11	chr5:140165875-140391929	0.0391992	1.01773	4.69839
PLCH2	chr1:2407753-2436964	0.0782608	2.03134	4.698
LIFR	chr5:38475064-38595507	0.183123	4.75309	4.69799
PPM1E	chr17:56833231-57184266	0.00953542	0.247478	4.69786
ZNF540	chr19:38039850-38105079	0.103063	2.67364	4.69721
REEP6	chr19:1491164-1497924	3.43857	89.0736	4.69512
ENO3	chr17:4854383-4860426	0.997503	25.8197	4.69401
FGFR3	chr4:1795038-1810599	0.0968243	2.50206	4.6916
EPHX1	chr1:225997796-226070420	29.8513	769.693	4.68842
SEC14L4	chr22:30884897-30901698	0.124729	3.21038	4.68587
PPP1R3C	chr10:93388196-93392858	0.537033	13.7314	4.67632
UNC93A	chr6:167704802-167729502	0.0681428	1.73668	4.67163
FCRL6	chr1:159772172-159786047	0.13961	3.55332	4.66969
AOC4	chr17:41019161-41021234	0.194754	4.92279	4.65975
SLC16A2	chrX:73641084-73753752	1.39228	35.1154	4.65658
AQP9	chr15:58430407-58478110	3.67452	92.6747	4.65655
NFASC	chr1:204797781-204991950	0.168642	4.23889	4.65165
SPATA25	chr20:44515129-44516238	0.119857	2.9951	4.64321
MOGAT1	chr2:223536456-223574649	0.137003	3.41886	4.64123
GRM1	chr6:146348781-146758731	0.00907244	0.226223	4.64011
GALNTL1	chr14:69726680-69821190	0.0616724	1.53705	4.6394
FIGN	chr2:164464117-164592513	0.0558221	1.37651	4.62403
SLC25A42	chr19:19174802-19223704	0.103352	2.53289	4.61515
GLT1D1	chr12:129338080-129469509	0.168434	4.12326	4.61353
CNKSR2	chrX:21392535-21672813	0.029121	0.712314	4.61238
CLEC4D	chr12:8666135-8674960	0.0701709	1.71308	4.60958
OGN	chr9:95059639-95432547	0.0469251	1.14523	4.60913
DLGAP1	chr18:3496029-4455266	0.0178167	0.431137	4.59685
GZMM	chr19:544026-549919	0.164934	3.94583	4.58037
PACRG	chr6:161768589-163745505	0.0468211	1.11942	4.57945
HMGN5	chrX:80369199-80554046	0.220908	5.27778	4.57841
SPTLC3	chr20:12989626-13147411	0.166091	3.96654	4.57784
STOX2	chr4:184826508-184938875	0.0271626	0.64864	4.57772
ALDH1L1	chr3:125822407-125899485	2.69362	63.9266	4.5688
ALPL	chr1:21835857-21904905	0.709124	16.7137	4.55885
CETP	chr16:56995834-57017756	1.64649	38.5947	4.55094
SLC14A1	chr18:43304091-43332485	0.0320968	0.750002	4.54639
SLC47A1	chr17:19437166-19482346	1.04295	24.3578	4.54564
TTPA	chr8:63972047-63998612	0.698556	16.2978	4.54416
RET	chr10:43572516-43625797	0.0558202	1.30149	4.54324
AASS	chr7:121713597-121784344	0.575556	13.2562	4.52557
GPR182	chr12:57388354-57390469	0.0445185	1.01771	4.51478
PVRIG	chr7:99775537-99869855	0.0891029	2.03693	4.51478
CXorf57	chrX:105855159-105922673	0.0354849	0.811104	4.51461
ANKRD20A1,ANKRD20A3	chr9:67926760-67970293	0.0182822	0.417877	4.51457
PKNOX2	chr11:125034558-125303285	0.0171526	0.391831	4.51373
CTAGE1	chr18:19993563-19997878	0.0147046	0.335886	4.51363
IL18RAP	chr2:103035253-103069024	0.0983687	2.22202	4.49753
CFB	chr6_ssto_hap7:3246430-3252571	56.4004	1271.84	4.49507
LDHD	chr16:75145757-75150670	0.357242	8.01143	4.48709
SCN9A	chr2:167051696-167232497	0.277872	6.2147	4.48319
PTGDS	chr9:139871955-139876194	1.01151	22.5268	4.47707
ADCY1	chr7:45614124-45762714	0.0932407	2.06815	4.47123
LOC100133331	chr5:180750506-180755196	0.0145959	0.323672	4.4709
C1orf220	chr1:178511930-178518024	0.0255297	0.556809	4.44694
FCRL2	chr1:157715522-157746922	0.0254006	0.553991	4.44693
KIF19	chr17:72322350-72351959	0.0175881	0.38352	4.44663
SCN3B	chr11:123499894-123525315	0.0110558	0.24107	4.44657
ABCA9	chr17:66970772-67057136	0.326873	7.12623	4.44634
RNLS	chr10:90033620-90343082	0.0613785	1.33746	4.44562
IL18R1	chr2:102979096-103015217	0.109424	2.36717	4.43516
MGMT	chr10:131265453-131565783	0.861962	18.5767	4.42973
SEC14L2	chr22:30792929-30821291	2.12976	45.7093	4.42372
NAT2	chr8:18248754-18258723	0.273749	5.86138	4.42032
CYP3A7	chr7:99282301-99332819	5.08238	108.635	4.41784
CNGA1	chr4:47937993-48014961	0.164358	3.51151	4.41717
TPRG1	chr3:188889762-189041271	0.175165	3.71046	4.40481
LIME1	chr20:62367977-62370460	0.919843	19.4437	4.40177
ALDH4A1	chr1:19197923-19229293	0.951395	19.9765	4.39211
ABCC11	chr16:48200821-48269088	0.070972	1.48081	4.38299
FLJ45513	chr17:47915670-47926199	0.0639877	1.32936	4.3768
FUT7	chr9:139901685-139931234	0.027423	0.569651	4.37662
TUBB1	chr20:57594308-57601709	0.0183764	0.381636	4.37627
SLFN12L	chr17:33801941-33814758	1.12704	23.0555	4.3545
VEPH1	chr3:156977531-157221415	0.0749589	1.52348	4.34513
PYHIN1	chr1:158901336-158946849	0.64222	13.0282	4.34243
C1S	chr12:7167979-7178335	88.2472	1783.59	4.33709
STAG3L1	chr7:74988428-74996914	0.234539	4.69879	4.32439
DENND5B	chr12:31535156-31743952	0.183939	3.68242	4.32335
PYGM	chr11:64513860-64528187	0.249861	4.98856	4.31943
KLRB1	chr12:9747869-9760497	1.03547	20.482	4.30599
CRYBB1	chr22:26995361-27013991	0.0855087	1.69005	4.30485
ITLN1	chr1:160846329-160854960	0.0624022	1.2326	4.30397
FLJ39653	chr4:16228285-16259810	0.0264242	0.521678	4.30323
TAS2R13	chr12:10998447-11325723	0.127258	2.51232	4.3032
FAM176A	chr2:75719443-75796848	0.150772	2.97645	4.30315
C6orf165	chr6:88117689-88174191	0.0301532	0.595089	4.30272
GPER	chr7:1036622-1177893	0.0496503	0.979735	4.30252
SLCO4C1	chr5:101569691-101632253	0.0117814	0.232399	4.30202
CGNL1	chr15:57668702-57842925	3.07042	60.4757	4.29985
METTL7B	chr12:56075329-56106089	2.0576	40.3343	4.29297
ANPEP	chr15:90328125-90358072	5.88001	113.619	4.27224
ARHGEF26	chr3:153742189-153975616	0.455119	8.788	4.27122
CYP4F11	chr19:16023179-16045676	0.5247	10.0798	4.26384
RASGRP2	chr11:64494382-64512928	0.233176	4.47645	4.26286
GCNT2	chr6:10521567-10629601	0.545437	10.4342	4.25776
QPRT	chr16:29690440-29709314	0.585662	11.1884	4.2558
LOC728640	chr10:60272903-60588845	0.0785179	1.49506	4.25104
SCD	chr10:102106771-102124588	10.3402	196.64	4.24922
C7orf58	chr7:120628750-120937498	1.61505	30.6842	4.24785
OXER1	chr2:42989638-42991401	0.740316	14.0472	4.246
F12	chr5:176829138-176836577	4.04033	76.434	4.24167
GJB1	chrX:70430034-70948962	4.68367	88.3736	4.2379
PNPLA7	chr9:140354404-140444986	0.262631	4.94905	4.23604
MTUS2	chr13:29598747-30080084	0.0448262	0.843872	4.23461
INHBE	chr12:57849095-57851791	0.298529	5.60929	4.23187
STON2	chr14:81726993-81893748	0.176774	3.31887	4.23071
GUSBP4	chr6:58246158-58287724	0.761746	14.2722	4.22775
FGF21	chr19:49259343-49261582	0.090111	1.68749	4.22703
GPR141	chr7:37779995-37780913	0.257623	4.82389	4.22687
TAS2R60	chr7:143078359-143220540	0.0813537	1.52313	4.22669
RUNX1-IT1	chr21:36160097-36421595	0.0945545	1.76868	4.22538
TMEM232	chr5:109755197-110062450	0.0202536	0.378579	4.22434
TRPV3	chr17:3416485-3461289	0.0188123	0.351624	4.22429
HRSP12	chr8:99114566-99129418	14.1038	262.598	4.2187
LPHN3	chr4:62362838-62938168	0.0510014	0.942468	4.20784
C11orf52	chr11:111783459-111797595	0.260949	4.81579	4.20593
GPR146	chr7:1036622-1177893	0.117347	2.15391	4.1981
GABRE	chrX:151121595-151143151	0.0615887	1.1299	4.19738
LILRB5	chr19:54754269-54761167	0.382056	6.9952	4.19451
CSTA	chr3:122044010-122060815	0.690668	12.6289	4.19259
TRPM8	chr2:234826042-234928166	0.211878	3.86682	4.18984
CLEC12A	chr12:10103914-10138194	0.497345	8.99958	4.17754
SLC41A2	chr12:105197274-105322472	1.10479	19.9912	4.17752
HSD17B2	chr16:82068857-82132139	2.57348	46.5463	4.17687
KLRK1	chr12:10524951-10562745	0.7463	13.4423	4.17088
C1orf115	chr1:220863627-220872499	0.0656114	1.18103	4.16996
KMO	chr1:241695433-241803701	0.716123	12.8871	4.16957
GATA4	chr8:11561716-11617509	0.18883	3.39221	4.16706
FCRL3	chr1:157647977-157670647	0.193534	3.46131	4.16066
DNAH11	chr7:21582832-21985542	0.0431351	0.770115	4.15814
EHHADH	chr3:184880688-184971886	1.82448	32.4414	4.15227
NCKAP5	chr2:133429371-134326031	0.14076	2.48754	4.14342
KIR3DX1	chr19:55043908-55055195	0.0397871	0.702746	4.14263
FIGF	chrX:15363712-15511711	0.0324416	0.572892	4.14235
CCR7	chr17:38710021-38721736	0.0612563	1.08169	4.14228
CYP4F22	chr19:15619335-15663128	0.201506	3.55775	4.14207
RAB37	chr17:72667255-72743474	0.0989743	1.74745	4.14205
AXDND1	chr1:179334854-179545084	0.0527797	0.931679	4.14178
KIAA1383	chr1:232940637-232946092	0.0805336	1.42137	4.14154
PPARGC1A	chr4:23793643-23891700	0.434617	7.57807	4.12402
PDK4	chr7:95212808-95225925	2.16254	37.6704	4.12263
GCET2	chr3:111839687-111852152	0.0195885	0.340895	4.12125
UNC5CL	chr6:40994639-41006938	0.144892	2.51488	4.11744
TAS2R19	chr12:10998447-11325723	0.264403	4.58441	4.11592
EML5	chr14:89081173-89259096	0.0259985	0.449826	4.11286
ESPN	chr1:6484847-6521004	0.200006	3.45508	4.1106
MCF2L2	chr3:182895830-183145855	0.0661478	1.14005	4.10726
TNFSF14	chr19:6663147-6670599	0.0900302	1.54403	4.10015
SERPINF1	chr17:1665258-1680859	27.0039	463.102	4.10009
HCG27	chr6_ssto_hap7:2500481-2506687	0.0801562	1.37414	4.09957
SLC25A27	chr6:46620651-46645927	0.216471	3.70954	4.09899
B3GAT1	chr11:134248397-134281812	0.0350433	0.600396	4.09871
CCDC141	chr2:179694483-179914786	0.142042	2.42939	4.09621
TMEM110	chr3:52867130-52931597	0.0184372	0.314928	4.09433
ZNF831	chr20:57766074-57834167	0.0590461	1.00794	4.09342
FAM63A	chr1:150969300-150980854	0.327194	5.50896	4.07356
ULK4P3	chr15:32698800-32727250	0.0648181	1.07823	4.05613
TPSAB1	chr16:1290677-1292555	0.123273	2.05044	4.05601
DIRAS3	chr1:68167148-68698284	0.0425992	0.708208	4.05528
KLF8	chrX:56258821-56314322	0.0261765	0.435087	4.05496
KIF12	chr9:116853917-116861337	0.202384	3.36382	4.05493
AMY2B	chr1:104068577-104122149	3.19344	53.0739	4.05482
HDC	chr15:50534145-50558162	0.0248456	0.412861	4.05459
DGKI	chr7:137074384-137531609	0.0132064	0.219383	4.05415
TRPA1	chr8:72753776-72987819	0.0121178	0.201293	4.0541
POLR2J2	chr7:102277194-102312176	0.181208	2.99191	4.04535
SLC15A2	chr3:121613170-121663034	0.0924731	1.52106	4.0399
ZNF850	chr19:37234379-37263716	0.0321243	0.525235	4.03123
KIAA1456	chr8:12803182-12887284	0.0128623	0.209872	4.02828
TDRD6	chr6:46655611-46703430	0.0206391	0.335655	4.02353
IQGAP2	chr5:75699148-76003957	4.7433	76.8746	4.01854
GLYCTK	chr3:52321835-52329272	2.10798	34.1062	4.0161
SIGLEC8	chr19:51954250-51961708	0.198491	3.20647	4.01384
ACAD11	chr3:132276981-132593050	1.43088	23.111	4.0136
TAS2R14	chr12:10998447-11325723	0.163369	2.63386	4.01098
ZNF404	chr19:44376514-44384288	0.0741416	1.1939	4.00926
SERPINA3	chr14:95078713-95090390	90.4609	1455.13	4.00771
TAS2R31	chr12:10998447-11325723	0.374424	5.9965	4.00138
C11orf70	chr11:101918168-101955291	0.0608236	0.970503	3.99603
SPDYE5	chr7:75124298-75133628	0.0737765	1.17486	3.99318
PKD1L3	chr16:71963440-72033877	0.0363168	0.578136	3.9927
APBA1	chr9:72042448-72287275	0.0851853	1.35599	3.9926
GBP7	chr1:89597433-89641723	2.69328	42.7429	3.98825
SCN4B	chr11:118004091-118023630	0.0456476	0.722194	3.98378
FABP4	chr8:82390731-82395473	0.484608	7.66484	3.98337
MST1P2	chr1:16972068-16976915	1.34499	21.2375	3.98095
ADAM20	chr14:70989077-71001732	0.116994	1.84682	3.98054
SELP	chr1:169558087-169599377	0.101988	1.60981	3.98042
KCNA3	chr1:111214309-111217655	0.173314	2.71956	3.97192
ECHDC2	chr1:53361581-53387446	3.46259	54.3318	3.97187
SLC23A3	chr2:220026180-220034817	0.0329906	0.517399	3.97115
LY75-CD302	chr2:160625138-160761267	0.49474	7.75006	3.96947
KLRC4	chr12:10524951-10562745	0.677318	10.6057	3.96886
A2M	chr12:9217772-9268558	62.3795	975.281	3.96667
RGS11	chr16:318309-325914	0.0279775	0.436932	3.96507
GRIA3	chrX:122318095-122624766	0.18206	2.8421	3.96448
ZNF345	chr19:37288451-37407193	0.0885105	1.37922	3.96186
RGS18	chr1:192127591-192154945	0.468711	7.30306	3.96173
LOC100131193	chr9:139690789-139735639	0.0277769	0.432756	3.9616
TBX21	chr17:45810609-45823485	0.102335	1.59426	3.96151
NPY1R	chr4:164245116-164253947	0.0659464	1.02727	3.96137
CCDC73	chr11:32605312-32816187	0.0158658	0.247106	3.96114
NLRC3	chr16:3589035-3627392	0.272951	4.25045	3.9609
P2RY13	chr3:150804675-151176497	0.236096	3.65338	3.95179
JMJD5	chr16:27214806-27233089	1.20284	18.5728	3.94868
MAN1C1	chr1:25943958-26111258	0.78751	12.1409	3.94643
FMO4	chr1:171283485-171311223	1.12842	17.3867	3.94561
ZFHX4	chr8:77523113-77779521	0.276319	4.2431	3.94071
FBXO17	chr19:39432041-39466380	0.092291	1.40625	3.92952
ZNF571	chr19:38039850-38105079	0.0877806	1.33726	3.92923
FLRT2	chr14:85996487-86094270	0.0519373	0.790784	3.92844
SLC38A11	chr2:165754708-165812035	0.0382956	0.581413	3.92431
OSBPL6	chr2:179059207-179672150	0.0866297	1.315	3.92406
SLC6A16	chr19:49792891-49828474	0.110922	1.6818	3.92239
UGT2A3	chr4_ctg9_hap1:506427-529760	0.328415	4.95546	3.91543
CPA3	chr3:148583042-148614872	0.0821221	1.23723	3.9132
ERMN	chr2:158175124-158184146	0.0345222	0.5199	3.91264
MYCN	chr2:16080019-16087129	0.0504608	0.759908	3.91259
ASB9	chrX:15262108-15288589	0.162364	2.44295	3.91132
SLC10A5	chr8:82605890-82607207	0.766497	11.4951	3.9066
TFPI	chr2:188328957-188419219	4.14914	62.1247	3.90428
SORCS2	chr4:7194373-7744564	0.103261	1.54371	3.90203
DGAT2	chr11:75479777-75512581	2.42396	36.1412	3.89821
CYP27A1	chr2:219646471-219680016	10.0121	148.697	3.89255
TNFSF8	chr9:117655622-117692875	0.118285	1.7426	3.88091
NELL2	chr12:44902057-45307711	0.576242	8.47543	3.87854
GRAP2	chr22:40297085-40367384	0.721894	10.5957	3.87555
ZMAT1	chrX:101137259-101187039	0.276224	4.05367	3.87532
CHI3L1	chr1:203148058-203155922	3.04918	44.504	3.86744
CRYGS	chr3:186256231-186262167	0.288906	4.20869	3.8647
C10orf107	chr10:63422718-63526091	0.0581853	0.846762	3.86323
SMA5	chr5:69776869-69881549	0.0781301	1.13644	3.86249
GPR171	chr3:150804675-151176497	0.419917	6.10774	3.86246
TMEM156	chr4:38968440-39034041	0.51362	7.47036	3.8624
C11orf21	chr11:2317506-2323143	0.0614675	0.893975	3.86234
SOCS2	chr12:93959403-93969978	0.211601	3.07711	3.86215
LINC00341	chr14:95873603-95876427	0.0462233	0.672052	3.86188
SLITRK3	chr3:164904507-164914469	0.0601838	0.87484	3.86157
FLJ10038	chr15:50569388-50650503	0.0105263	0.152993	3.8614
ZNF814	chr19:58380746-58400442	0.228497	3.321	3.86137
GFRA2	chr8:21549529-21646346	0.0221935	0.321594	3.85703
SPEG	chr2:220299699-220358354	0.0231063	0.331991	3.84478
MOCS1	chr6:39760158-39902290	1.13007	16.2009	3.8416
ARSE	chrX:2852672-2882494	5.47418	78.2931	3.83817
PC	chr11:66615996-66725847	2.11646	30.2372	3.8366
SULT1C2	chr2:108905094-108926371	0.093467	1.33494	3.83617
CCBP2	chr3:42850963-42908775	0.131797	1.87054	3.82707
ABCD2	chr12:39945021-40013843	0.105846	1.50183	3.82668
MGST1	chr12:16500075-16517344	17.2239	244.264	3.82596
EMR1	chr19:6887559-6940464	0.24251	3.43259	3.82318
BSN	chr3:49591921-49708982	0.0191427	0.270229	3.81932
ANO5	chr11:22214721-22304913	0.0654789	0.922318	3.81616
C1orf127	chr1:11006529-11042094	0.0473676	0.664104	3.80944
PDZRN4	chr12:41582249-41968392	0.0398237	0.558294	3.80933
PNMA3	chrX:152224765-152228827	0.0341015	0.478025	3.80918
FLT3	chr13:28577410-28674729	0.0664913	0.932046	3.80916
EPHX2	chr8:27348518-27402439	9.31328	130.461	3.80818
EMB	chr5:49692030-49737234	0.706854	9.8773	3.80463
ZNF85	chr19:21106058-21133503	0.0450503	0.628972	3.80339
CISH	chr3:50643884-50649262	0.159037	2.21374	3.79905
SULT1B1	chr4:70592685-70626430	0.165452	2.29295	3.79272
GAPT	chr5:57787329-57792185	0.0904142	1.25219	3.79176
PHGDH	chr1:120254418-120286849	4.45625	61.7107	3.79162
ZNF547	chr19:57874878-57890925	0.0706903	0.978854	3.79151
N4BP2L1	chr13:32974859-33002315	0.341301	4.71443	3.78797
ZNF221	chr19:44455396-44471752	0.190919	2.63448	3.78649
SUSD4	chr1:223394160-223537544	0.137003	1.87978	3.77829
LOC727896	chr18:2916991-3011945	0.339788	4.64568	3.77318
MOGAT3	chr7:100839012-100844302	0.455508	6.2068	3.7683
LOC554206	chr16:25043061-25044098	0.0734251	0.992624	3.7569
GPR21	chr9:125703287-125867147	0.216841	2.93136	3.75686
C1orf228	chr1:45140393-45191263	0.164132	2.21697	3.75566
CA3	chr8:86351055-86361267	0.157075	2.12154	3.75559
RAD9B	chr12:110940004-110969891	0.0722312	0.975513	3.75547
EPB42	chr15:43489425-43513323	0.0269747	0.364302	3.75546
SNAP25	chr20:10004459-10288066	0.0655892	0.885731	3.75534
ST3GAL6	chr3:98451571-98513236	1.25175	16.9035	3.75531
ASAH2	chr10:51946999-52008370	0.11497	1.55248	3.75524
NOTUM	chr17:79910382-79919057	0.060246	0.813518	3.75524
C5orf65	chr5:138727634-138730885	0.0198599	0.2681	3.75484
FAM18A	chr16:10837697-10912621	0.0193003	0.260541	3.75482
WHAMMP3	chr15:23187728-23208357	0.017875	0.241292	3.75476
COL21A1	chr6:55921387-56112378	0.0456968	0.616811	3.75466
CNTN3	chr3:74311721-74570343	0.0252139	0.340311	3.75456
VTCN1	chr1:117686208-117753582	0.0248797	0.333364	3.74406
C10orf32-AS3MT	chr10:104613966-104661655	0.818693	10.9422	3.74043
HBG2	chr11:5274420-5276011	1.47857	19.6948	3.73554
C8orf42	chr8:439789-495781	0.0187947	0.250302	3.73527
ADD2	chr2:70889215-70995375	0.0173088	0.229545	3.7292
RNF165	chr18:43914186-44040783	0.0476472	0.630713	3.72652
NCR1	chr19:55417507-55424439	0.321674	4.24712	3.72281
NRAP	chr10:115310589-115423805	0.058095	0.760028	3.70957
ARHGAP15	chr2:143886898-144525921	4.805	62.7881	3.70788
CXCR6	chr3:45959390-46037316	2.84554	37.167	3.70725
SETBP1	chr18:42260137-42648475	1.689	22.0401	3.70589
CHN2	chr7:29234120-29553944	0.860798	11.2312	3.7057
RELN	chr7:103112230-103629963	1.25336	16.2958	3.70063
TIGD7	chr16:3348807-3368576	0.0375075	0.486847	3.69821
LGSN	chr6:63985855-64029882	0.0222494	0.288738	3.69792
DEFB1	chr8:6728096-6735529	5.85569	75.9603	3.69733
ST6GAL1	chr3:186648314-186796341	4.9225	63.5826	3.69117
CD52	chr1:26608772-26647014	6.25819	80.7757	3.6901
ANKRD24	chr19:4183350-4224811	0.11074	1.42908	3.68983
LOC550112	chr4:68566995-68588222	0.145313	1.87159	3.68702
ZNF582	chr19:56894647-56904889	0.0868947	1.11316	3.67924
ADORA2A	chr22:24823529-24890783	0.153895	1.97128	3.67911
SFXN5	chr2:73169164-73298965	0.307208	3.90744	3.66894
SLC22A3	chr6:160769424-160876014	0.245196	3.11256	3.6661
ZNF680	chr7:63980254-64023505	0.212685	2.69457	3.66326
TXLNB	chr6:139561198-139613208	0.0674506	0.854375	3.66297
CMAHP	chr6:25081294-25138620	0.481777	6.10182	3.6628
CHIC1	chrX:72782983-72906937	0.0540325	0.682461	3.65885
NAV2	chr11:19372270-20143147	0.657269	8.28458	3.65587
CD79B	chr17:62006097-62009704	0.345847	4.32828	3.64559
FAM159A	chr1:53099065-53122737	0.125081	1.56303	3.64341
ZAP70	chr2:98330030-98356323	1.31869	16.4746	3.64307
PGAM2	chr7:44102325-44105186	0.188096	2.34853	3.64222
TIFAB	chr5:134784557-134788089	0.0570291	0.711352	3.64079
BCRP3	chr22:25028881-25055114	0.0498584	0.621789	3.64052
APOA4	chr11:116691417-116694011	0.242277	3.02135	3.64046
SULT1C4	chr2:108994420-109004270	0.0416282	0.519036	3.6402
EBLN2	chr3:73046118-73115011	0.0416858	0.519755	3.6402
NOG	chr17:54671059-54672951	0.0359648	0.448354	3.63998
GIPR	chr19:46171501-46185717	0.0666776	0.831178	3.63988
PCDHB17	chr5:140535579-140537990	0.0274605	0.342258	3.63966
SCNN1D	chr1:1215815-1227409	0.0439265	0.54747	3.63962
DLGAP3	chr1:35331036-35370984	0.0178803	0.222797	3.63929
ZNF667	chr19:56950692-56988770	0.0330804	0.412194	3.63928
CLU	chr8:27454433-27472328	51.6351	638.507	3.62828
PDE7B	chr6:136172833-136516709	0.221466	2.73491	3.62634
HHIP	chr4:145564067-145659881	0.234672	2.88665	3.62068
RAB39A	chr11:107799276-107834208	0.230947	2.83931	3.6199
IL12RB2	chr1:67773046-67862583	0.709294	8.70671	3.61767
FOLH1	chr11:49168186-49230222	1.89378	23.2198	3.61602
PKD1L1	chr7:47814249-47988071	0.0340179	0.416692	3.61461
GPX3	chr5:150399998-150408554	2.77003	33.8057	3.60929
CD226	chr18:67530192-67624232	0.597526	7.29171	3.60918
ZNF512B	chr20:62571181-62601218	0.317062	3.8622	3.60659
F8	chrX:154064063-154250998	0.286789	3.48932	3.60488
ZNF549	chr19:58038692-58052244	0.262397	3.18921	3.60337
ZNF626	chr19:20802744-20844402	0.130634	1.58736	3.60303
NLRP1	chr17:5404718-5487832	1.01001	12.2001	3.59446
SHE	chr1:154451953-154474526	0.0909102	1.0906	3.58454
IL11RA	chr9:34652181-34661884	1.41493	16.9127	3.57931
AADAT	chr4:170981372-171011372	1.40123	16.7474	3.57917
HSP90AB4P	chr15:58888509-59042177	0.27778	3.31957	3.57898
ADTRP	chr6:11713887-11779280	0.0759042	0.907019	3.57888
CHRD	chr3:184097860-184107617	0.528884	6.30615	3.57574
ERRFI1	chr1:8071778-8086393	11.2356	132.727	3.56232
FKSG29	chr13:99848627-100058554	0.461421	5.44986	3.56206
IGSF10	chr3:150804675-151176497	0.0577121	0.681472	3.56171
P2RY8	chrY:1531465-1606037	0.0900061	1.05913	3.55671
MTMR8	chrX:63487960-63615333	0.172568	2.02265	3.55101
BEST1	chr11:61717355-61735132	0.416026	4.86831	3.54867
LARGE	chr22:33669061-34316416	0.630095	7.36887	3.5478
KLRG1	chr12:9142220-9163340	0.153377	1.79268	3.54697
SIDT1	chr3:113251217-113348422	0.151125	1.76515	3.54598
C14orf64	chr14:98391946-98444461	0.242668	2.82448	3.54093
CXCR2P1	chr2:218899656-218955304	0.15697	1.82618	3.54027
EID3	chr12:104609558-104744062	0.287726	3.3389	3.53661
FAM190A	chr4:91048683-92523370	0.113725	1.31564	3.53214
PHYH	chr10:13319795-13342130	13.9668	161.353	3.53014
KCNJ8	chr12:21917888-21927747	1.16932	13.5043	3.52967
FOXA3	chr19:46367517-46377055	0.917919	10.595	3.52888
RAPGEF4	chr2:173587917-173917620	0.758738	8.75655	3.52869
NDRG4	chr16:58497548-58547523	0.0408063	0.467469	3.51801
TNNI2	chr11:1860232-1862910	0.747363	8.56101	3.5179
GNAT2	chr1:110145888-110155705	0.0524623	0.599782	3.51509
DNAH1	chr3:52350334-52434513	0.682474	7.80225	3.51504
AMPH	chr7:38423296-38671167	0.0195394	0.223247	3.51419
TAS1R3	chr1:1266725-1269844	0.0257258	0.293904	3.51406
LOC729603	chr6:160390130-160527583	0.0206775	0.236198	3.51386
SOX7	chr8:10581277-10588022	0.0200916	0.229502	3.51384
KIAA1908	chr7:1609708-1629261	0.0219761	0.251024	3.51382
ITGA2B	chr17:42449549-42466873	0.0193312	0.220812	3.51381
CERS4	chr19:8274216-8327304	0.904158	10.2546	3.50355
TNFAIP8L2-SCNM1	chr1:151129104-151148547	0.470174	5.318	3.49961
PSTPIP1	chr15:77287464-77329671	0.956195	10.8126	3.49927
FRRS1	chr1:100111430-100231349	1.83617	20.7478	3.49819
RUNDC3B	chr7:87133178-87461613	0.255746	2.88497	3.49577
DHCR24	chr1:55315299-55352921	10.2185	115.015	3.49258
MS4A14	chr11:60163486-60185228	0.557388	6.26701	3.49102
CD96	chr3:111260925-111371206	1.15523	12.9842	3.49051
BZRAP1	chr17:56378593-56494931	0.115654	1.29967	3.49026
ZNF530	chr19:58111252-58119637	0.109671	1.23003	3.48744
CIDEB	chr14:24774392-24787242	1.54707	17.3364	3.4862
FOXP3	chrX:49091926-49121288	0.204717	2.28543	3.48076
PECR	chr2:216903110-216946539	4.39898	48.9863	3.47713
KCNJ5	chr11:128761312-128787951	0.718898	7.97903	3.47235
GGTA1P	chr9:124217318-124262306	0.573851	6.36274	3.4709
FOLR2	chr11:71927818-71932994	2.56965	28.4512	3.46884
MYO7A	chr11:76839309-76926286	2.34275	25.9314	3.46842
COBLL1	chr2:165541257-165697928	2.62617	28.9815	3.4641
CLEC3B	chr3:45067758-45077563	0.663513	7.2984	3.45938
LY9	chr1:160765927-160798045	0.575961	6.33392	3.45906
ACCS	chr11:44087728-44105569	1.3787	15.1557	3.45848
MEIS2	chr15:37183221-37393500	0.360683	3.96084	3.45701
PMEL	chr12:56347888-56360496	0.950923	10.3913	3.44991
SLAMF1	chr1:160579890-160617081	0.472758	5.15662	3.44725
SLC5A4	chr22:32614462-32651318	0.0668255	0.728895	3.44724
LOC144571	chr12:9217772-9268558	0.0611631	0.667082	3.44713
NLRP6	chr11:278569-285304	0.0489447	0.533734	3.4469
USP32P2	chr17:18414575-18424566	0.0264417	0.288256	3.44646
OPRL1	chr20:62711470-62731996	0.0381917	0.416023	3.44533
CDH23	chr10:73156690-73575704	0.945364	10.2948	3.4449
HS3ST3B1	chr17:14204505-14249492	0.298727	3.24109	3.43958
BTLA	chr3:112182812-112218408	0.100491	1.09019	3.43943
ZNF461	chr19:37128282-37157739	0.182283	1.97702	3.43908
ZNF260	chr19:37001588-37019248	0.399832	4.33452	3.43841
RNASE4	chr14:21152335-21168758	11.618	125.852	3.43729
EVC2	chr4:5564145-5711275	0.273057	2.95447	3.43563
VAV2	chr9:136627015-136857446	1.38745	14.9592	3.43053
ENTPD5	chr14:74433180-74486026	6.25139	67.2628	3.42756
HGF	chr7:81331443-81399452	0.785037	8.43001	3.4247
ENAM	chr4:71494460-71512536	0.0331295	0.35541	3.4233
ABCG2	chr4:89011415-89080011	0.614895	6.59216	3.42234
LOC100507577	chr16:48274602-48420559	0.981771	10.4649	3.41403
CYP7B1	chr8:65508528-65711348	0.857526	9.1365	3.41339
INSIG1	chr7:155089485-155101945	3.55356	37.8319	3.41227
SYT7	chr11:61281187-61348344	0.364128	3.86424	3.40767
ITK	chr5:156607906-156682109	1.16191	12.3052	3.40469
CUZD1	chr10:124591670-124658230	0.0315212	0.333816	3.40466
IL17RB	chr3:53880576-53899827	1.42099	15.0358	3.40343
THSD7B	chr2:137748461-138435287	0.0642461	0.678103	3.39982
CLEC10A	chr17:6977855-6983600	0.447102	4.69858	3.39355
ANGPTL1	chr1:178694299-178889237	0.162904	1.71036	3.3922
ATP6V1G2-DDX39B	chr6_ssto_hap7:2827543-2845430	0.413887	4.31402	3.38172
RPL23AP32	chr2:54683453-54898583	0.298475	3.11018	3.38131
PPIAL4A,PPIAL4C	chr1:149553002-149553787	0.135763	1.41442	3.38105
CPM	chr12:69244955-69357020	0.600847	6.25915	3.3809
C21orf49	chr21:34144410-34186053	0.0618302	0.643399	3.37933
DCXR	chr17:79993756-79995573	90.1846	937.876	3.37844
IL27	chr16:28510682-28518155	0.0728042	0.757088	3.37837
LOC100652768	chr11:117049938-117075508	0.0586381	0.609545	3.37782
PRR22	chr19:5782970-5784776	0.0512577	0.53272	3.37754
PCP4L1	chr1:161228516-161255240	0.0997994	1.03717	3.37748
ESR2	chr14:64693750-64805268	0.0442237	0.459538	3.37729
PKD2L1	chr10:102047902-102090243	0.0424928	0.441548	3.37728
ATP6V1B1	chr2:71162997-71192561	0.0699673	0.726853	3.37691
PTH1R	chr3:46919235-46945289	0.271666	2.82215	3.37689
ZNF662	chr3:42947401-42960825	0.090835	0.943525	3.37674
SHC2	chr19:416582-460996	0.423358	4.39705	3.37658
C16orf54	chr16:29753785-29757340	0.0506517	0.526058	3.37654
KATNAL2	chr18:44526786-44628614	0.0690965	0.717578	3.37645
LOC147804,ZNF761	chr19:53935226-53961515	0.0443852	0.460937	3.37642
C7orf10	chr7:40174574-40900366	1.50258	15.602	3.37621
ZNF793	chr19:37997840-38034239	0.0523736	0.543701	3.3759
XG	chrX:2670092-2734541	0.0451499	0.468673	3.37579
RYR1	chr19:38924339-39078204	0.298135	3.09454	3.37569
ATF7IP2	chr16:10479911-10577495	0.961192	9.91969	3.3674
AOAH	chr7:36552548-36764154	5.86587	60.5232	3.36707
ANK2	chr4:113739238-114304896	0.178388	1.83911	3.36592
CYP4V2	chr4:187112673-187134617	4.32446	44.5641	3.36529
TBX1	chr22:19744225-19771112	0.143819	1.48092	3.36416
RARRES2	chr7:150035406-150038763	24.115	248.303	3.3641
SCML4	chr6:108023363-108145521	0.111618	1.14441	3.35795
TRAT1	chr3:108541630-108573714	0.611335	6.26711	3.35777
SLC37A4	chr11:118895060-118901616	5.12991	52.4728	3.35457
PARP15	chr3:122296448-122355536	1.19285	12.1924	3.35349
FAM20A	chr17:66531256-66597095	2.00216	20.4527	3.35266
LOC100130015	chr16:90089007-90114191	0.0531904	0.54319	3.35222
GAB3	chrX:153903526-153979348	0.306432	3.12711	3.35119
GRM8	chr7:126078651-126892428	0.0901417	0.91737	3.34724
GJA5	chr1:147228331-147245484	0.286994	2.91718	3.34548
SEC31B	chr10:102246402-102279595	0.38391	3.90057	3.34484
HTRA4	chr8:38831667-38846181	1.0184	10.3142	3.34026
WDR17	chr4:176986984-177103979	0.067558	0.683825	3.33943
THEMIS	chr6:128029338-128239776	0.511918	5.16453	3.33465
C1R	chr12:7187514-7245043	55.2187	556.786	3.33389
IL1RAP	chr3:190231839-190374986	3.7738	38.0255	3.33288
SLC2A10	chr20:45338278-45364985	2.03963	20.5078	3.32979
PABPC5	chrX:90689596-90693583	0.0559653	0.561769	3.32737
SGCD	chr5:155753766-156194798	0.353935	3.55092	3.32664
ANKRD44	chr2:197851385-198175521	4.89531	49.0985	3.3262
PCDHGA5	chr5:140710251-140892548	0.109611	1.09684	3.32288
ZNF808	chr19:53030908-53059303	0.817944	8.17011	3.32028
SDC2	chr8:97505881-97624037	2.32322	23.1859	3.31905
TMEM86B	chr19:55738001-55740632	0.196343	1.95834	3.31818
MTSS1	chr8:125563027-125740730	2.83064	28.1607	3.31448
SCN1B	chr19:35521591-35531353	0.851682	8.46931	3.31386
RAB26	chr16:2198650-2204141	0.385299	3.82557	3.31162
TSHZ2	chr20:51588945-52111869	0.274251	2.71929	3.30966
ABCA5	chr17:67144147-67323323	0.469404	4.63908	3.30493
FAM71F2	chr7:128312345-128323379	0.135609	1.33956	3.30424
TRIM74	chr7:75024902-75034888	0.106313	1.04971	3.30361
SCARA3	chr8:27491576-27534286	0.0806386	0.795941	3.30312
CEACAM19	chr19:45174723-45187627	0.0593708	0.585894	3.30281
ADRA1B	chr5:159343739-159400017	0.118304	1.16738	3.3027
TSNAXIP1	chr16:67841009-67861971	0.0540589	0.533397	3.3026
WDR64	chr1:241815579-241965434	0.0290198	0.286241	3.30212
ECM2	chr9:95059639-95432547	1.06484	10.4843	3.29952
IRF4	chr6:391738-411443	0.271237	2.66921	3.29879
SDK1	chr7:3341079-4308631	0.0532886	0.522406	3.29327
LOC100131176	chr7:151078206-151110132	0.211161	2.06683	3.291
CTLA4	chr2:204732510-204738683	1.09656	10.715	3.28857
ALMS1P	chr2:73872045-73912694	0.13142	1.27454	3.27771
ZNF253	chr19:19976713-20004293	0.171157	1.65924	3.27713
PLIN5	chr19:4522543-4535208	0.162541	1.57565	3.27707
FAM13A-AS1	chr4:89630939-89978323	0.0603956	0.585358	3.2768
NRG3	chr10:83635069-84746935	0.052043	0.504368	3.2767
FGFR4	chr5:176513920-176525126	0.819294	7.92604	3.27415
STEAP3	chr2:119981383-120023227	4.81936	46.5777	3.27273
CRADD	chr12:94071150-94244531	2.35664	22.7588	3.27162
C6orf225	chr6:112391859-112423993	0.171865	1.65742	3.26959
DNAJC22	chr12:49741040-49745685	0.673488	6.49162	3.26886
OLFM2	chr19:9964393-10047070	1.50235	14.4657	3.26735
C2orf72	chr2:231902280-231914427	1.45175	13.9766	3.26715
GRAMD1C	chr3:113557680-113666021	0.714111	6.86568	3.26518
ZNF334	chr20:45129706-45142194	0.107683	1.03457	3.26417
MRO	chr18:48321489-48351754	0.090306	0.867262	3.26357
GVINP1	chr11:6734380-6743110	0.89199	8.56138	3.26274
CFL2	chr14:35179587-35184029	6.34901	60.9233	3.26239
MBNL3	chrX:131503342-131623996	0.294564	2.82309	3.26062
TMEM37	chr2:120189445-120196096	1.72105	16.4769	3.25909
GNRH1	chr8:25276773-25282556	0.226909	2.17045	3.25781
FAT3	chr11:92085261-92629635	0.0448099	0.428568	3.25763
FXYD2	chr11:117690789-117748201	1.18505	11.3328	3.25748
FAM65B	chr6:24804512-24911195	0.435884	4.16827	3.25743
LOC388630	chr1:48226199-48462562	0.0530808	0.505124	3.25038
DTHD1	chr4:36283243-36347378	0.38037	3.60863	3.24597
CPVL	chr7:29019582-29186153	9.86084	93.5398	3.2458
SORBS2	chr4:186506597-186877870	2.36213	22.3827	3.24422
AGAP9	chr10:48215723-48237508	0.249877	2.36464	3.24233
SYTL5	chrX:37865834-37988073	0.120274	1.1378	3.24185
NAALADL2	chr3:174577110-175523428	0.282373	2.66517	3.23856
LAMC3	chr9:133884503-133968446	0.717297	6.75523	3.23536
PTCRA	chr6:42883726-42893575	0.110616	1.03633	3.22784
NAT8B	chr2:73927635-73928467	0.0978658	0.916544	3.22733
TAS2R10	chr12:10977944-10978868	0.0851463	0.797152	3.22684
EDA	chrX:68835910-69259321	0.191375	1.79056	3.22594
ACR	chr22:51176651-51183727	0.052235	0.488602	3.22557
ST8SIA6	chr10:17362675-17496254	0.152992	1.43103	3.22552
CLNK	chr4:10491837-10686386	0.0412578	0.385809	3.22515
CCDC65	chr12:49297892-49315359	0.0376968	0.352476	3.22501
TSKS	chr19:50243010-50266515	0.0377677	0.353139	3.22501
SCTR	chr2:120197418-120282028	0.262564	2.45504	3.225
FBXO24	chr7:100183955-100205798	0.067837	0.634265	3.22494
LOC100272216	chr5:68926979-68929028	0.16442	1.53718	3.22483
C7orf13	chr7:156431059-156433348	0.0581534	0.543627	3.22468
DGKB	chr7:14184673-14881075	0.0384404	0.359253	3.22431
MARC2	chr1:220921675-220957596	3.19825	29.8176	3.22081
SLC4A4	chr4:72053002-72437804	0.370815	3.45639	3.2205
GAL3ST4	chr7:99756864-99766373	0.33717	3.12471	3.21218
ZFP57	chr6_ssto_hap7:980721-985482	0.400875	3.71031	3.21032
CCDC17	chr1:46085715-46089731	0.0600423	0.554059	3.20599
ELMO1	chr7:36892510-37488895	2.0156	18.5314	3.20069
DNAJC12	chr10:69556426-69597937	1.21045	11.1135	3.1987
VAMP1	chr12:6561176-6579843	0.268896	2.46343	3.19555
HNMT	chr2:138721807-138773934	5.57696	51.05	3.19436
ITM2A	chrX:78615880-78623049	2.04897	18.729	3.1923
COL18A1	chr21:46825096-46933634	20.0745	183.178	3.18981
SLC40A1	chr2:190425315-190445537	17.9922	163.403	3.183
LOC729737	chr1:134772-140566	3.31287	30.0621	3.18179
MTHFS	chr15:80135888-80217196	2.89713	26.2646	3.18042
PTN	chr7:136912091-137028546	0.317492	2.87499	3.17876
TRERF1	chr6:42192668-42419783	0.204621	1.84379	3.17165
NBR2	chr17:41277599-41297125	0.3145	2.83287	3.17113
C9orf68	chr9:4598315-4666674	0.0512247	0.460973	3.16977
TLR7	chrX:12885201-12908480	0.668867	6.01408	3.16855
DAPK1	chr9:90112755-90323549	3.99225	35.8473	3.16659
ENPP3	chr6:131958441-132068550	0.163513	1.46451	3.16295
ZNF418	chr19:58433251-58446740	0.121311	1.0797	3.15384
PUS10	chr2:61167547-61279125	0.352187	3.13449	3.15382
SLC16A7	chr12:60083125-60175408	0.489447	4.34821	3.1512
ADAMTS10	chr19:8645125-8675588	0.224847	1.99217	3.14732
LOC100132707	chr7:154720226-154794682	0.461333	4.08576	3.14672
ENPP1	chr6:132129155-132216295	1.58482	14.019	3.14499
ZNF772	chr19:57980953-57988938	0.130509	1.15313	3.14333
FAM157A	chr3:197879236-197907728	0.113843	1.00584	3.14329
PCBP1-AS1	chr2:70187223-70314147	0.0555538	0.490456	3.14217
GPR114	chr16:57576600-57611100	0.272119	2.40171	3.14175
STL	chr6:125229391-125284173	0.0235168	0.20753	3.14155
CXCL12	chr10:44865604-44880545	9.76168	86.0598	3.14014
MS4A7	chr11:60145957-60163426	2.84037	24.9971	3.13761
KIAA0748	chr12:55343864-55378456	0.459043	4.03398	3.1355
SLC1A3	chr5:36606456-36688436	2.46953	21.6336	3.13097
SLC9A9	chr3:142984063-143567373	0.812848	7.11925	3.13067
TAS2R20	chr12:10998447-11325723	0.248491	2.17582	3.13029
SUMO4	chr6:149639435-149732747	0.638658	5.58694	3.12894
CROCCP3	chr1:16793930-16819196	0.0584954	0.510132	3.12448
GREB1	chr2:11674241-11782912	0.182292	1.58957	3.12431
SPAG16	chr2:214149115-215275225	0.379641	3.30841	3.12343
CCL18	chr17:34391642-34398841	6.7469	58.7877	3.12322
HIST1H4F	chr6:26240653-26241021	2.75353	23.9315	3.11955
SLC13A3	chr20:45186461-45318276	0.13178	1.14321	3.11689
PXMP2	chr12:133264191-133281577	3.17279	27.501	3.11566
LOC285359	chr3:101431277-101432260	0.707359	6.13077	3.11555
KCNN3	chr1:154669941-154842754	0.042351	0.366659	3.11397
ALDH6A1	chr14:74486058-74551196	23.9386	207.246	3.11393
SLC5A9	chr1:48688356-48714316	0.363702	3.14855	3.11386
SEPT7P2	chr7:45763385-45808617	0.0894747	0.774481	3.11368
KLHDC1	chr14:50159822-50219870	0.511427	4.4262	3.11347
TMTC1	chr12:29653745-29937692	0.0636247	0.55045	3.11295
FABP3	chr1:31838099-31845923	0.889509	7.68368	3.11072
CAMK4	chr5:110559946-110820748	0.386958	3.33914	3.10923
GMFG	chr19:39818998-39826726	8.74965	75.3351	3.10602
DEPDC7	chr11:33037409-33055128	2.19333	18.8566	3.10388
CAND2	chr3:12838170-12876313	0.0748731	0.643533	3.1035
KNDC1	chr10:134973970-135039916	0.101114	0.868389	3.10235
F13A1	chr6:6144310-6320924	1.4048	12.0125	3.09609
ZSCAN12	chr6:28346597-28367544	0.309599	2.64734	3.09607
HHEX	chr10:94449680-94455408	3.51585	30.0344	3.09467
ITGAD	chr16:31404632-31437826	0.652319	5.57098	3.09428
ITGA10	chr1:145524989-145543868	0.1095	0.934741	3.09363
FBP1	chr9:97365420-97402531	15.6587	133.338	3.09005
TECTA	chr11:120973374-121061515	0.14461	1.23103	3.08963
FAM184A	chr6:119280995-119470358	0.201586	1.71216	3.08635
MS4A6A	chr11:59939079-59952139	16.6505	141.36	3.08573
SLCO2B1	chr11:74862031-74917445	4.99257	42.3569	3.08474
IL6R	chr1:154377668-154441926	1.45979	12.3624	3.08213
MATN2	chr8:98881310-99048946	0.733798	6.20697	3.08043
HOMER2	chr15:83517728-83621476	1.03747	8.76575	3.07881
TMC8	chr17:76108998-76139049	1.70654	14.3983	3.07674
COL27A1	chr9:116918230-117072975	1.13427	9.56062	3.07534
UGP2	chr2:64068097-64118696	36.2807	305.497	3.07389
ABCC9	chr12:21950323-22089628	1.44788	12.1828	3.07283
CD48	chr1:160648535-160681641	10.8638	91.3617	3.07206
ZNF606	chr19:58488440-58518574	0.210486	1.76398	3.06704
NFATC1	chr18:77155771-77289323	0.352418	2.94721	3.06399
IFFO1	chr12:6648693-6665249	0.831617	6.95293	3.06363
NFATC2	chr20:50007764-50179168	1.83117	15.2976	3.06247
NCAM1	chr11:112831968-113149158	0.146834	1.22611	3.06183
CCL15	chr17:34310691-34329084	1.60468	13.3626	3.05784
KIAA1683	chr19:18367905-18385319	0.201491	1.67718	3.05725
TAS2R46	chr12:10998447-11325723	0.168861	1.40522	3.05689
RAB3C	chr5:57878938-58147406	0.0760181	0.632461	3.05656
OR56B1	chr11:5757677-5758768	0.137786	1.14614	3.05629
DHRS4L1	chr14:24505709-24520580	0.116709	0.970543	3.05588
OR6A2	chr11:6815755-6817139	0.154826	1.2873	3.05562
C8orf48	chr8:13424351-13425797	0.0490071	0.407439	3.05552
CCR8	chr3:39371196-39375171	0.189704	1.57711	3.05546
TUBB8	chr10:92827-95178	0.0468	0.389067	3.05544
DLK1	chr14:101193201-101201467	0.0438705	0.364684	3.05532
HPGDS	chr4:95219706-95264027	0.0861728	0.716318	3.05529
RPL21P44	chr4:54851665-54853449	0.0384421	0.319513	3.05512
EID2B	chr19:40021629-40023494	0.0365537	0.303802	3.05504
C15orf33	chr15:49447975-49913118	0.0339014	0.281739	3.05494
ZNF812	chr19:9800813-9811493	0.0671606	0.558135	3.05493
USHBP1	chr19:17360848-17375544	0.054946	0.456553	3.05469
TEX22	chr14:105864919-105880196	0.0255947	0.212659	3.05462
LPHN2	chr1:82266081-82458107	3.85356	32.0169	3.05457
C14orf55	chr14:70935595-70950473	0.0427482	0.355142	3.05446
JAZF1	chr7:27870192-28280996	0.181855	1.51076	3.05441
TMEM154	chr4:153547265-153601317	0.0803664	0.667642	3.05441
CES2	chr16:66968346-66978994	8.77474	72.8937	3.05436
MKX	chr10:27961802-28034778	0.0528492	0.439014	3.05431
C1QTNF7	chr4:15341559-15447791	0.0583435	0.484653	3.05431
CILP	chr15:65488336-65503840	0.0992281	0.824205	3.05418
PCDH9	chr13:66876965-67804468	0.0509954	0.423575	3.05418
FAH	chr15:80445232-80478924	15.8985	131.744	3.05077
CELF2	chr10:11047258-11378672	0.937969	7.74392	3.04545
DCDC2	chr6:24171982-24383520	0.20552	1.69243	3.04175
AOC2	chr17:40996608-41002724	0.178172	1.46444	3.03901
FAT4	chr4:126237566-126414087	0.959416	7.85665	3.03369
ACADSB	chr10:124768428-124817806	4.65343	38.1019	3.0335
F2RL2	chr5:75699148-76003957	0.0787352	0.642842	3.02938
NDRG2	chr14:21484921-21493935	8.19639	66.9017	3.02898
CLDN2	chrX:106143292-106174091	0.579345	4.72068	3.0265
PID1	chr2:229888688-230136057	0.578846	4.7099	3.02445
TMEM220	chr17:10616638-10633646	0.964063	7.835	3.02273
C10orf131	chr10:97471535-97849992	0.313961	2.54592	3.01953
NNMT	chr11:114166534-114183238	33.1485	268.66	3.01876
SLA2	chr20:35201875-35274619	0.234597	1.90108	3.01856
ZNF382	chr19:37096220-37119499	0.116048	0.94004	3.018
CST7	chr20:24929865-24940564	1.94191	15.7209	3.01714
KBTBD10	chr2:170366211-170382772	0.241317	1.9494	3.01403
BTD	chr3:15643254-15687325	3.32515	26.8201	3.01182
IGSF9	chr1:159896828-159915386	0.125965	1.01566	3.01132
SLIT3	chr5:168093070-168728133	0.338485	2.7265	3.00989
ZNF816	chr19:53430387-53466164	0.252199	2.02526	3.00547
ZNF254	chr19:24269975-24312654	0.175866	1.41105	3.00421
ZNF684	chr1:40997232-41013841	0.576808	4.62691	3.00389
MT1F	chr16:56691854-56693215	4.8188	38.622	3.00268
CD3G	chr11:118215058-118224497	3.13784	25.1191	3.00094
SYNE1	chr6:152442818-152958534	1.96323	15.6957	2.99907
NUDT7	chr16:77756388-77776157	1.1349	9.05673	2.99642
NPW	chr16:2069520-2070756	0.226058	1.80238	2.99514
RFX2	chr19:5978413-6110664	0.0473153	0.376706	2.99306
FAM78A	chr9:134133464-134151906	0.145825	1.16084	2.99286
KLHDC7A	chr1:18807423-18812480	0.0747041	0.594623	2.99272
CDH2	chr18:25530929-25757445	4.18187	33.2581	2.99149
ZNF600	chr19:53268747-53290034	0.672314	5.34439	2.99082
LRMP	chr12:25205180-25348094	0.457726	3.63695	2.99017
PCDHB5	chr5:140514799-140517704	0.313816	2.49079	2.98861
SCP2	chr1:53392900-53517289	43.5801	345.646	2.98755
P2RY12	chr3:150804675-151176497	0.383309	3.03858	2.98682
AKR7L	chr1:19592475-19600568	1.09175	8.65398	2.98672
GJC2	chr1:228337414-228347527	0.222728	1.76394	2.98545
PDCD1	chr2:242792032-242801058	0.731201	5.74609	2.97424
SMARCA1	chrX:128580477-128657460	2.45352	19.227	2.97021
SLC2A9	chr4:9827847-10041872	2.71816	21.2528	2.96695
IKZF3	chr17:37921198-38020441	1.22181	9.53163	2.96371
GJC3	chr7:99520891-99527243	0.267916	2.08921	2.9631
PROCA1	chr17:27030533-27038872	0.116935	0.911652	2.96278
GPR183	chr13:99848627-100058554	0.614682	4.78964	2.96201
CXCR1	chr2:219027567-219031716	0.0531063	0.413677	2.96155
SSTR2	chr17:71161159-71168062	0.0438683	0.341674	2.96137
RASGEF1A	chr10:43689983-43762367	0.0798606	0.621973	2.9613
KHK	chr2:27309610-27341995	12.7185	98.8465	2.95826
ASB2	chr14:94400498-94443076	0.189819	1.46807	2.95123
ZNF548	chr19:57901217-57913919	0.389404	3.00392	2.94751
GGCX	chr2:85766100-85788657	2.41206	18.5954	2.94661
CLEC7A	chr12:10269375-10282868	0.939168	7.23378	2.94529
IMPG2	chr3:100941389-101039419	0.037041	0.284542	2.94145
MFSD2A	chr1:40420783-40435628	5.85416	44.9153	2.93967
UBASH3A	chr21:43823970-43867790	0.839414	6.439	2.93938
ZNF160	chr19:53569866-53606687	0.481825	3.69325	2.93831
LOC653075	chr15:30427989-30439395	0.351833	2.69198	2.93571
CSAD	chr12:53551446-53584654	1.59512	12.1936	2.93439
ADAMTS13	chr9:136243283-136324508	0.786128	6.00148	2.93248
GPR174	chrX:78426468-78427726	1.85121	14.1315	2.93238
LOC653513	chr1:144614958-144828810	1.10614	8.43966	2.93165
CMTM2	chr16:66613350-66622177	0.213765	1.63009	2.93086
NEDD4	chr15:56119121-56285835	1.30825	9.96693	2.92951
ZNF648	chr1:182023704-182030847	0.0526721	0.401081	2.92878
FST	chr5:52776263-52782304	1.71369	13.0453	2.92835
PRLR	chr5:35048860-35230823	0.869535	6.61643	2.92774
ZBTB20	chr3:114056946-114866127	2.32826	17.6949	2.926
KLHL3	chr5:136953188-137071779	0.146339	1.11091	2.92435
ITGA9	chr3:37493812-37861281	4.32829	32.8458	2.92384
ACAA1	chr3:38080695-38178733	13.4578	101.973	2.92168
COLEC11	chr2:3642421-3692234	7.90539	59.8869	2.92133
MRC1	chr10:18098351-18200091	10.6802	80.6493	2.91673
DDO	chr6:110713382-110736753	0.322988	2.43734	2.91576
IL13RA2	chrX:114238537-114252207	0.208398	1.57029	2.91362
ALAD	chr9:116148591-116163618	2.98632	22.4883	2.91274
AGBL2	chr11:47681142-47736928	0.0713941	0.537469	2.9123
TTC39C	chr18:21572736-21715574	1.51443	11.3901	2.91094
KAT2B	chr3:20081523-20195896	2.19748	16.5003	2.90856
KIAA1324	chr1:109656584-109749403	0.168015	1.25766	2.90408
ONECUT2	chr18:55102916-55158530	0.166729	1.24683	2.90269
LYVE1	chr11:10562782-10715535	0.923664	6.90714	2.90265
PDGFD	chr11:103777913-104035027	0.288589	2.15589	2.90119
NEB	chr2:152341852-152591001	0.996481	7.44375	2.90112
DNAH6	chr2:84743578-85046713	0.273118	2.0392	2.90041
LIN7A	chr12:81191170-81331694	1.01061	7.53929	2.8992
SNRPN	chr15:25068793-25223729	3.98816	29.7397	2.89859
ECHDC3	chr10:11784355-11806065	2.72465	20.2527	2.89397
HECW1	chr7:43152197-43602938	0.0637042	0.472381	2.89049
CPQ	chr8:97657498-98155722	5.48951	40.703	2.89039
NR3C1	chr5:142657495-142815077	8.61855	63.8296	2.88871
ZNF701	chr19:53073525-53090427	0.191802	1.4188	2.88699
SULT1A1	chr16:28616907-28634907	4.01433	29.6446	2.88454
CD3D	chr11:118209788-118213459	20.3055	149.88	2.88387
CSRNP3	chr2:166326156-166545917	0.0315201	0.232481	2.88277
ACBD4	chr17:43209966-43221543	3.8957	28.6774	2.87996
MAGI2	chr7:77646373-79100524	0.0994907	0.732379	2.87996
GZMK	chr5:54320106-54329960	7.27164	53.3858	2.8761
CCR2	chr3:46395234-46402413	0.853364	6.26399	2.87585
CYP3A5	chr7:99245812-99277621	65.6001	480.892	2.87394
L3MBTL4	chr18:5954704-6414910	1.19798	8.78192	2.87393
ZNF256	chr19:58452200-58459077	0.634804	4.64706	2.87194
RORC	chr1:151778546-151804348	1.04731	7.66494	2.87158
TRPV4	chr12:110220891-110271241	1.66018	12.1331	2.86954
SEC16B	chr1:177898241-177939050	1.72529	12.5891	2.86726
SNX20	chr16:50700210-50715264	0.193609	1.41127	2.86578
CSF2	chr5:131409484-131411863	0.211903	1.54386	2.86507
CD200R1L	chr3:112534555-112564797	0.111619	0.812198	2.86324
C8orf45	chr8:67782983-67837777	0.0329722	0.239818	2.86262
CHRDL2	chr11:74407473-74442186	0.0824592	0.599737	2.86258
SNAI3	chr16:88729780-88753594	0.0402655	0.292849	2.86254
KIR3DL1	chr19:55327892-55342233	0.0357726	0.260142	2.86237
PCDHGB8P	chr5:140710251-140892548	0.137226	0.997883	2.86231
ESPNP	chr1:17017712-17046652	0.0335056	0.243641	2.86228
ANKRD29	chr18:21179977-21242849	0.0586058	0.426112	2.86212
CX3CR1	chr3:39304984-39323226	0.0625121	0.454498	2.86206
FAM90A1	chr12:8373855-8380214	0.366895	2.66741	2.862
ZNF416	chr19:58082933-58090243	0.262868	1.91111	2.862
PCDHGC4	chr5:140710251-140892548	0.0753443	0.547754	2.86196
IGIP	chr5:139505520-139508391	0.0681075	0.495111	2.86187
FLRT3	chr20:13976145-16033841	0.133421	0.969774	2.86166
BCL11B	chr14:99635624-99737822	0.0816018	0.593036	2.86145
TM6SF1	chr15:83776323-83806111	2.52786	18.3457	2.85946
PRKCH	chr14:61788514-62017698	2.07022	14.9907	2.85621
RBP1	chr3:139236275-139258671	6.2759	45.4271	2.85566
CD247	chr1:167399876-167487847	1.36058	9.84334	2.85493
ZNF234	chr19:44645709-44664462	0.409734	2.96326	2.85443
SERPING1	chr11:57365026-57382326	418.795	3027.5	2.85381
DDX26B	chrX:134654554-134716460	0.846363	6.11721	2.85353
MARCO	chr2:119699744-119752236	8.22807	59.412	2.85213
KCNMA1	chr10:78629358-79397577	3.90848	28.2131	2.85168
SH2D1A	chrX:123480131-123507010	0.523908	3.78172	2.85166
ZNF551	chr19:58193356-58201169	0.67452	4.84887	2.84572
DTNA	chr18:32073253-32471808	1.32586	9.51901	2.84389
ITGAL	chr16:30483982-30534506	4.69773	33.6666	2.84128
ARHGEF6	chrX:135747711-135863503	1.16897	8.37163	2.84027
SIRPB2	chr20:1455235-1472233	0.20729	1.48299	2.83879
LOC100653515	chr17:76849058-76921472	0.605943	4.3327	2.83801
TBC1D10C	chr11:67171383-67177561	1.07213	7.65131	2.83523
PGM5	chr9:70970108-71145977	0.444048	3.16759	2.8346
CLCN5	chrX:49687224-49863892	0.644461	4.57891	2.82884
RIMKLB	chr12:8850517-8929787	0.536814	3.81198	2.82805
TCF7L1	chr2:85360582-85537511	0.379229	2.68729	2.82501
TRAF3IP3	chr1:209929393-209957890	2.66577	18.8287	2.82031
ZNF563	chr19:12428303-12444534	0.35359	2.49705	2.82008
EBF1	chr5:158122922-158526788	0.178748	1.26193	2.81963
ACAP1	chr17:7239847-7254793	2.28795	16.1423	2.81872
CD69	chr12:9905081-9913497	1.15601	8.15045	2.81773
PPP1R16B	chr20:37434347-37551667	0.786969	5.54708	2.81735
SLC46A3	chr13:29274217-29293150	1.75539	12.3709	2.81709
FNDC4	chr2:27714749-27718126	1.86426	13.1286	2.81604
GZMA	chr5:54398473-54406080	12.5887	88.6319	2.81569
HLA-DOA	chr6_ssto_hap7:4452675-4458104	0.405765	2.85363	2.81408
DZIP1L	chr3:137780826-137834451	0.286961	2.018	2.81399
SLC45A2	chr5:33944720-33984780	0.120474	0.847173	2.81393
MFAP3L	chr4:170907747-170947429	0.343093	2.40949	2.81205
ST8SIA4	chr5:100142638-100238987	1.98727	13.9382	2.81019
ZNF528	chr19:52901120-52921657	0.192262	1.3475	2.80914
FASLG	chr1:172628184-172636012	0.550308	3.84952	2.80637
ZNF736	chr7:63773185-63810017	0.352306	2.46194	2.80489
ZNF285	chr19:44889807-44905777	0.170821	1.19116	2.80181
STAG3	chr7:99775537-99869855	0.211541	1.47474	2.80145
CYP4F3	chr19:15751706-15771570	7.73335	53.8105	2.79872
IL16	chr15:81489218-81616524	1.44563	10.0552	2.79817
AURKAPS1	chr1:220321609-220445843	0.5932	4.12526	2.7979
ATP8B4	chr15:50150434-50411419	0.640151	4.44591	2.79599
C11orf65	chr11:108253726-108338258	0.221354	1.53461	2.79344
ZDHHC11	chr5:795719-851101	0.0756596	0.523855	2.79157
C12orf59	chr12:10331556-10344403	0.0702782	0.486572	2.7915
MACROD2	chr20:13976145-16033841	0.0389198	0.268504	2.78637
ZNF83	chr19:53115617-53193886	0.707641	4.87673	2.78483
FER1L4	chr20:34146506-34195484	0.104197	0.717865	2.78439
CYP21A1P	chr6_ssto_hap7:3306068-3368931	2.72271	18.724	2.78178
ZNF529	chr19:37034516-37096178	0.31791	2.18366	2.78006
HYDIN	chr16:70841288-71264625	0.558664	3.83595	2.77953
HLA-L	chr6_ssto_hap7:1557339-1564729	0.0683998	0.46871	2.77663
FAM46C	chr1:118148603-118171011	1.02938	7.04877	2.77559
CD27	chr12:6548166-6560884	1.63803	11.1801	2.7709
ZNF211	chr19:58144534-58154147	0.934698	6.37959	2.77089
TMEM86A	chr11:18720350-18747777	0.877436	5.98727	2.77053
AKR1C1	chr10:5005453-5020158	21.1987	144.636	2.77038
KLRD1	chr12:10457049-10469850	0.241577	1.64793	2.7701
SIRPG	chr20:1609797-1638425	1.97624	13.4788	2.76987
LRRK2	chr12:40618812-40763086	1.13748	7.7445	2.76733
SEPSECS	chr4:25121626-25162204	0.677231	4.61044	2.76718
GOLT1A	chr1:204167287-204183220	3.70563	25.2003	2.76565
CCBE1	chr18:57098170-57364644	0.199449	1.35623	2.76552
APOE	chr19:45409038-45412650	666.15	4529.67	2.76549
ZNF516	chr18:74069636-74207146	0.222145	1.51008	2.76505
FAM24B	chr10:124591670-124658230	0.140538	0.954567	2.76388
C17orf107	chr17:4736634-4806369	0.357527	2.42423	2.7614
CD200R1	chr3:112641531-112693937	1.48694	10.0678	2.75933
RRN3P2	chr16:29086162-29128038	2.4608	16.6564	2.75888
SLC16A4	chr1:110905472-110933704	1.13678	7.69193	2.7584
GTF2IRD2B	chr7:74508346-74565623	2.12902	14.3975	2.75756
RPS2P32	chr7:23530006-23531031	0.149029	1.00738	2.75694
LST1	chr6_ssto_hap7:2884757-2891563	13.7231	92.7583	2.75687
LOC100507331	chr10:75545381-75561556	0.193822	1.30925	2.75594
CCDC36	chr3:49235860-49295537	0.0486073	0.328138	2.75506
PCDHAC2	chr5:140165875-140391929	0.0988527	0.66732	2.75503
C5orf20	chr5:134779903-134783038	0.0412983	0.27876	2.75487
MYCBPAP	chr17:48585744-48608862	0.0405345	0.273602	2.75486
VWCE	chr11:61025757-61062788	0.10893	0.735219	2.75478
CD2	chr1:117297085-117311851	8.80109	59.3989	2.75468
RGAG4	chrX:71130937-71363424	0.0877352	0.592111	2.75464
ZNF862	chr7:149535508-149564568	0.433037	2.92206	2.75442
GRIN3A	chr9:104331633-104500862	0.0319117	0.215329	2.75438
MAP4K1	chr19:39078280-39108643	2.43896	16.4266	2.75169
ACOT1	chr14:73945188-74025651	6.6058	44.4803	2.75136
EVI2A	chr17:29421944-29704695	1.0451	7.03116	2.75012
MUT	chr6:49398072-49431041	8.35957	56.1217	2.74706
NINL	chr20:25433337-25566153	0.329503	2.21049	2.746
DPT	chr1:168664694-168698442	0.877053	5.88165	2.74549
EMR4P	chr19:6952510-6990857	0.52705	3.53298	2.74487
PPP1R3B	chr8:8993763-9009152	2.95388	19.7879	2.74394
ALDH2	chr12:112204690-112247789	91.5015	612.747	2.74342
TNNT2	chr1:201328141-201346805	0.134188	0.898303	2.74295
BTBD11	chr12:107712196-108053419	0.114527	0.765516	2.74074
RLTPR	chr16:67679029-67694718	0.523138	3.49383	2.73955
ANKRD53	chr2:71205574-71212629	0.0949734	0.634264	2.73949
VNN1	chr6:133001996-133035194	2.17639	14.5077	2.73682
ATP8B2	chr1:154298035-154323780	2.76511	18.4166	2.7356
PDE6B	chr4:619362-664681	0.117449	0.780639	2.73262
ZNF420	chr19:37569381-37620651	0.327938	2.17957	2.73255
ZNF583	chr19:56915382-56936400	0.337308	2.23759	2.72981
BACH2	chr6:90636246-91006627	0.0881028	0.583947	2.72858
PRKCQ	chr10:6469104-6622254	0.886394	5.87044	2.72745
KIF17	chr1:20990506-21044317	0.135372	0.896089	2.72671
GADD45G	chr9:92219926-92221469	0.781035	5.16826	2.72622
ZNF521	chr18:22641887-22932214	0.58309	3.85602	2.72532
TYW1B	chr7:72023728-72298813	1.31124	8.65791	2.72308
ADAMTS17	chr15:100511642-100882183	0.197133	1.29955	2.72077
HIST1H1A	chr6:26017259-26018040	1.60053	10.5506	2.72071
CLEC2B	chr12:10004967-10022458	2.81202	18.5233	2.71966
CCDC13	chr3:42749873-42814745	0.0691758	0.454988	2.71749
KIAA0825	chr5:93486555-93954309	0.326034	2.13764	2.71293
HTR2B	chr2:231921577-232037540	0.597977	3.91307	2.71014
AGAP11	chr10:88728187-88769960	0.615259	4.02515	2.70978
ZNF737	chr19:20720797-20748626	0.0737285	0.482179	2.70927
MATK	chr19:3777966-3801810	0.282252	1.84385	2.70767
KIAA1614	chr1:180882312-180915239	0.107113	0.699071	2.7063
STAT4	chr2:191894301-192016322	1.67234	10.9085	2.70551
POU5F2	chr5:92953430-93447404	0.670394	4.35516	2.69964
IFITM10	chr11:1490684-1785501	0.138046	0.895882	2.69816
PTPRCAP	chr11:67202980-67205153	0.785173	5.08239	2.69442
CTH	chr1:70876900-70905534	4.60531	29.8089	2.69437
RND1	chr12:49250915-49259653	0.374396	2.4205	2.69267
SND1-IT1	chr7:127292201-127732659	0.486713	3.13938	2.68934
ARHGAP22	chr10:49654067-49864310	0.406052	2.61736	2.68838
ERP27	chr12:15066975-15091463	0.228327	1.47104	2.68766
ENOX1	chr13:43787665-44361116	0.123413	0.794671	2.68687
ZNF214	chr11:7020548-7041586	0.122911	0.79143	2.68685
ETFDH	chr4:159593276-159629841	5.08896	32.742	2.6857
DOCK2	chr5:169064250-169510386	9.69541	62.3608	2.68527
PPFIBP2	chr11:7534995-7674996	4.57896	29.4406	2.68472
FGF13	chrX:137713733-138287185	0.174038	1.11785	2.68325
HKDC1	chr10:70980058-71027315	1.14544	7.35251	2.68234
TMEM56	chr1:95558072-95712781	1.06576	6.83503	2.68106
AK7	chr14:96858447-96955112	0.148706	0.952383	2.67908
RNF180	chr5:63461670-63668696	1.56034	9.99129	2.67881
SATB1	chr3:18389132-18480265	1.94729	12.4655	2.6784
FAM124B	chr2:225243414-225266711	0.107009	0.684451	2.67721
LRG1	chr19:4537226-4540036	9.63512	61.6238	2.67711
SLAMF6	chr1:160454819-160493052	1.55104	9.90226	2.67452
TM7SF4	chr8:105352053-105368916	0.243051	1.55102	2.67388
TOX	chr8:59717976-60031767	0.831368	5.29117	2.67003
PGM1	chr1:64058946-64125916	16.0575	101.92	2.66612
SNURF	chr15:25068793-25223729	18.279	115.878	2.66434
ZNF37BP	chr10:43008960-43048280	0.0712784	0.451354	2.66272
ZNF573	chr19:38229202-38270230	0.315913	2.0004	2.66269
DNAJC5B	chr8:66933790-67012755	1.60537	10.1185	2.65602
PTPRC	chr1:198608136-198726545	20.6416	130.065	2.65561
MCC	chr5:112312406-112824527	0.317551	2.00045	2.65526
TNRC6C	chr17:76000317-76107880	0.506391	3.19003	2.65525
ZNF568	chr19:37407230-37488834	0.297559	1.87331	2.65435
C14orf49	chr14:95883830-95942173	0.63053	3.96947	2.65431
SELL	chr1:169659805-169680843	1.28289	8.07159	2.65346
TMEM25	chr11:118401802-118436791	0.534585	3.36033	2.65211
HLA-DMB	chr6_ssto_hap7:4333159-4339601	6.89048	43.2856	2.65121
KYNU	chr2:143635194-143799885	3.19536	20.0653	2.65065
RUNX1T1	chr8:92967194-93115454	0.169047	1.05991	2.64845
TIGIT	chr3:114012832-114029135	0.635166	3.9804	2.64771
DUSP1	chr5:172195092-172198203	2.10035	13.1603	2.6475
MPDZ	chr9:13105702-13250365	2.2784	14.252	2.64507
PTTG2	chr4:37892704-38140796	0.334961	2.09525	2.64506
IL7R	chr5:35856990-35876923	1.85994	11.6335	2.64496
EPAS1	chr2:46524540-46613842	12.0791	75.535	2.64463
ZNF625	chr19:12242167-12267546	0.24453	1.52842	2.64396
DPRXP4	chr17:29297955-29326929	0.134277	0.839178	2.64377
CECR1	chr22:17660191-17690779	3.6707	22.9358	2.64347
CEBPA	chr19:33790839-33793430	5.17735	32.3416	2.64311
USP2	chr11:119225924-119252436	0.111356	0.694982	2.6418
ITGB1BP2	chrX:70430034-70948962	0.118312	0.737925	2.64088
CD7	chr17:80272745-80275480	0.282473	1.76169	2.64077
LTA	chr6_ssto_hap7:2870676-2872899	0.103032	0.642547	2.6407
EME2	chr16:1823228-1826239	0.161607	1.00782	2.64067
HSD17B7P2	chr10:38645307-38667433	0.966498	6.02681	2.64056
BTNL8	chr5:180326076-180377906	0.0434864	0.271138	2.64039
LINC00173	chr12:116971226-116974318	0.0872961	0.544249	2.64028
DPYD	chr1:97543299-98386615	11.6246	72.4646	2.6401
LOC284385	chr19:9732157-9745538	0.0372541	0.232222	2.64003
LOC401052	chr3:10048101-10052779	0.0358578	0.22351	2.63998
FAM113B	chr12:47602202-47630443	0.55121	3.4355	2.63985
ZNF846	chr19:9868150-9879410	0.72319	4.50728	2.63981
ZNF284	chr19:44576296-44591623	0.393369	2.45159	2.63976
TMEM169	chr2:216946588-216967506	0.0381982	0.238042	2.63964
SH3GL1P1	chr17:30348154-30380519	0.1057	0.658689	2.63962
WNT2B	chr1:113010039-113063910	0.167248	1.04222	2.6396
ZCCHC18	chrX:103139054-103401708	0.0638731	0.397981	2.63942
ZNF71	chr19:57106663-57135544	0.0414118	0.258025	2.6394
SNX22	chr15:64443915-64455354	0.0354764	0.221026	2.63928
LPIN2	chr18:2916991-3011945	5.94414	36.9737	2.63696
HLA-DRA	chr6_ssto_hap7:3754282-3759493	319.533	1980.96	2.63216
RCAN2	chr6:46188466-46459804	0.271533	1.68289	2.63174
SDS	chr12:113830250-113841692	1.0857	6.72364	2.63062
UCP3	chr11:73711325-73720282	0.0595878	0.368429	2.6283
CD6	chr11:60739112-60787848	1.54903	9.57608	2.62807
PTGR1	chr9:114287446-114362135	14.4454	89.2128	2.62664
CRYL1	chr13:20977805-21100012	8.53749	52.6468	2.62446
CEP85L	chr6:118781934-119031238	1.64528	10.1065	2.61887
SRGAP3	chr3:9022277-9291311	0.277596	1.70017	2.61462
CYB5A	chr18:71920526-71959251	128.197	784.949	2.61423
MAP3K12	chr12:53845885-53893444	0.475295	2.9068	2.61254
C1RL	chr12:7247145-7274447	1.85635	11.3495	2.61208
SUCNR1	chr3:151591430-151599876	0.63052	3.84347	2.60779
DYNC2H1	chr11:102980159-103350591	0.653648	3.98281	2.6072
FAM13A	chr4:89630939-89978323	1.01491	6.1828	2.6069
NCF1B	chr7:72634673-72649979	1.62288	9.87768	2.60562
ZNF439	chr19:11976843-11980306	0.697275	4.23782	2.60352
TREML1	chr6:41117341-41122070	0.473425	2.87229	2.60099
USP51	chrX:55511048-55515631	0.0863731	0.523129	2.59851
LRCH2	chrX:114345182-114468635	0.0767983	0.465118	2.59845
KLRC3	chr12:10564913-10573194	0.384591	2.32473	2.59567
MILR1	chr17:62461568-62464760	0.726404	4.38972	2.59529
ZEB2	chr2:145141941-145278466	9.78324	59.1171	2.59519
ANKRD6	chr6:90142896-90348474	0.41794	2.52399	2.59434
KEL	chr7:142638200-142659503	0.129291	0.77883	2.59068
IL6ST	chr5:55230924-55290821	6.63375	39.9448	2.59011
PLEKHH2	chr2:43864438-43995126	0.348866	2.09871	2.58876
HLA-DQB2	chr6_ssto_hap7:4155540-4162996	2.0626	12.3829	2.58582
MYO15A	chr17:18012019-18083116	0.0465747	0.27933	2.58435
ARHGAP19	chr10:98757794-99052430	0.049822	0.298548	2.5831
PCDHGA11	chr5:140710251-140892548	0.119786	0.715202	2.57789
GPR132	chr14:105515736-105531754	0.211489	1.26272	2.57788
SHMT1	chr17:18218593-18266856	12.216	72.929	2.57772
KCNH8	chr3:19190016-19577135	0.0497411	0.296943	2.57768
PCDHGA7	chr5:140710251-140892548	0.197086	1.1745	2.57515
S100A8	chr1:153362507-153363664	4.71327	28.0715	2.57431
TMEM175	chr4:926261-952443	1.27837	7.60678	2.57298
PDE1B	chr12:54943176-54973023	0.566452	3.37028	2.57284
DHRS1	chr14:24759803-24769039	8.10709	48.2246	2.57252
LOC100130581	chr17:41447212-41466266	0.0494046	0.293863	2.57243
AHSA2	chr2:61404554-61697849	1.4132	8.40514	2.57231
ZMYND15	chr17:4643318-4649410	0.686513	4.08146	2.57173
PLA2G2A	chr1:20301923-20306932	17.2368	102.396	2.57059
POU2F2	chr19:42590261-42636625	0.284014	1.68688	2.57033
ZNF682	chr19:20115226-20150277	0.143108	0.849268	2.56912
ASMTL-AS1	chrY:1469423-1522655	0.26824	1.58393	2.56192
C11orf75	chr11:93211638-93276546	0.476544	2.80865	2.55919
GABRR2	chr6:89967238-90024967	0.127798	0.752471	2.55778
BTBD16	chr10:124030820-124097676	0.110803	0.652311	2.55756
RASSF4	chr10:45455218-45490172	2.38035	14.0094	2.55715
RRN3P1	chr16:21807950-21830495	3.72139	21.8969	2.55681
RPGRIP1	chr14:21756135-21819460	0.048478	0.285237	2.55676
SCN3A	chr2:165944029-166060577	0.0619061	0.36418	2.5565
CAPN3	chr15:42651697-42704515	3.23429	19.025	2.55638
PALM2	chr9:112403067-112934791	0.0860082	0.505714	2.55577
TAS2R30	chr12:10998447-11325723	1.86359	10.956	2.55556
KLHL5	chr4:39046450-39127853	2.54615	14.9544	2.55418
STBD1	chr4:77135192-77232283	2.14228	12.5753	2.55337
C1orf54	chr1:150245182-150253335	13.5703	79.4856	2.55024
PTPN22	chr1:114356432-114447741	3.2018	18.7531	2.55017
CAT	chr11:34460471-34493607	58.5695	342.448	2.54766
LAT	chr16:28996146-29002104	0.587127	3.43191	2.54726
SENP7	chr3:101043117-101232085	1.62685	9.50855	2.54715
LOC284889	chr22:24235896-24241117	0.244033	1.42584	2.54666
TET1	chr10:70320116-70454239	0.411771	2.40436	2.54574
PSD3	chr8:18384812-18871196	1.42393	8.31213	2.54534
C2orf74	chr2:61372242-61391964	2.15303	12.5644	2.5449
LYZ	chr12:69742133-69748013	125.889	733.695	2.54303
OLFM1	chr9:137967088-138013030	0.204093	1.18947	2.54302
MAMDC4	chr9:139746818-139755251	0.40253	2.34428	2.54198
GPBAR1	chr2:219125737-219128582	0.775454	4.51328	2.54106
CCT6B	chr17:33254877-33288528	0.575526	3.34848	2.54056
SRPX	chrX:38008587-38080177	0.74095	4.31024	2.54032
PPFIA2	chr12:81652044-82153109	0.0377394	0.219469	2.53988
ASXL3	chr18:31158540-31327399	0.0405825	0.235922	2.53938
MCTP1	chr5:94042288-94620279	1.36826	7.95256	2.53908
ACAT1	chr11:107992257-108018891	30.7038	178.369	2.53837
PHLDB2	chr3:111393522-111695364	3.75157	21.7803	2.53746
AMICA1	chr11:118064441-118095809	3.78705	21.9597	2.53571
C16orf45	chr16:15528324-15682116	0.688018	3.97716	2.53122
ELFN1	chr7:1748797-1787590	0.666676	3.85172	2.53044
TG	chr8:133879204-134147143	0.285377	1.64833	2.53007
CHIT1	chr1:203185206-203198860	5.10227	29.4622	2.52966
ACOX1	chr17:73937588-74002080	9.86379	56.8734	2.52754
CR1	chr1:207669472-207815110	4.71358	27.1718	2.52722
GIMAP1	chr7:150413644-150440737	0.0820786	0.473127	2.52715
CASS4	chr20:54987167-55034396	0.396253	2.28214	2.52589
LOC100170939	chr5:69423288-69586004	0.682784	3.92864	2.52453
DHTKD1	chr10:12110933-12165224	10.6024	60.9309	2.52279
TNFRSF25	chr1:6521213-6580069	1.41857	8.15206	2.52273
ENPEP	chr4:111397228-111484493	2.1693	12.4658	2.52268
FCGR1B	chr1:120926127-120935944	4.59637	26.4119	2.52262
BRP44L	chr6:166778407-166796486	3.40307	19.5522	2.52242
ZNF708	chr19:21473962-21512212	0.270573	1.55344	2.52138
PXDC1	chr6:3722835-3752246	1.34083	7.69175	2.52019
CLEC2D	chr12:9822307-9852151	1.36143	7.80252	2.51882
MPV17L	chr16:15489610-15503543	0.175924	1.00778	2.51816
SUZ12P	chr17:29036625-29097068	0.2355	1.34854	2.5176
LIN7B	chr19:49617617-49622397	0.4474	2.56154	2.51737
[truncated: 2,169 more rows]
