# Supplementary material for: Responsiveness to PD-1 Blockade in End-Stage Colon Cancer with Gene Locus 9p24.1 Copy-Number Gain
Source: Oxford University Press journal article supplement (doi:10.1158/2326-6066.cir-18-0777), 2019-02-25
Supplement: 23266066cir180777-sup-211320_2_supp_5317782_pm99yd.xlsx [file 23266066cir180777-sup-211320_2_supp_5317782_pm99yd.xlsx]

## Sheet: Sheet1
Biological function annotation	p-value	Z-score	Molecules
Cell movement of phagocytes	2.43e-06	5.249	ACKR1,ADCY10,ADORA2A,AGER,AGT,AIF1,APOA1,ATRN,C1QBP,C3,C5,C5AR2,CAMP,CCL14,CCL15,CCL16,CCL19,CCL20,CCL22,CCL3L1,CCL5,CCR2,CCR5,CCR7,CD28,CD38,CD40LG,CFH,CFHR1,CMKLR1,CREB3,CSF2,CSF2RA,CTSG,CXCL1,CXCL11,CXCL12,CXCR1,CYTL1,DEFB1,DEK,FASLG,HGF,ICOS,IL16,IL21R,ITGA4,ITGAL,JAML,LPA,MIF,MST1,PF4,PIGR,PIK3CD,PIK3CG,PLA2G1B,PLCB2,PLG,PRKCB,PROC,RARRES2,S100A14,S100A8,SCN9A,SELE,SELL,SELP,SERPINA1,SERPINA…
Leukocyte migration	1.99e-10	5.005	ACKR1,ACKR2,ADCY10,ADD2,ADORA2A,AGER,AGT,AIF1,APOA1,ATRN,C1QBP,C3,C5,C5AR2,CAMP,CCL14,CCL15,CCL16,CCL17,CCL18,CCL19,CCL20,CCL22,CCL27,CCL28,CCL3L1,CCL5,CCR2,CCR4,CCR5,CCR7,CCR8,CD2,CD226,CD28,CD38,CD40LG,CD48,CFH,CFHR1,CMKLR1,CREB3,CSF2,CSF2RA,CTSG,CXCL1,CXCL11,CXCL12,CXCR1,CYTL1,DDR1,DEFB1,DEK,EFNB1,ENPP2,EZR,F2,F2RL1,F7,FASLG,FGF2,FYB1,FYN,GDF15,GDF2,GNAO1,GPR183,HGF,HRAS,HSPD1,ICOS,IL16,IL18,I…
Cell movement of leukocytes	6.24e-11	4.948	ACKR1,ACKR2,ADCY10,ADORA2A,AGER,AGT,AIF1,APOA1,ATRN,C1QBP,C3,C5,C5AR2,CAMP,CCL14,CCL15,CCL16,CCL17,CCL18,CCL19,CCL20,CCL22,CCL27,CCL28,CCL3L1,CCL5,CCR2,CCR4,CCR5,CCR7,CCR8,CD2,CD226,CD28,CD38,CD40LG,CD48,CFH,CFHR1,CMKLR1,CREB3,CSF2,CSF2RA,CTSG,CXCL1,CXCL11,CXCL12,CXCR1,CYTL1,DEFB1,DEK,EFNB1,ENPP2,EZR,F2,F2RL1,F7,FASLG,FYB1,FYN,GDF15,GNAO1,GPR183,HGF,HRAS,HSPD1,ICOS,IL16,IL18,IL21,IL21R,IL6,IL6R,I…
Cell movement of blood cells	3.7e-10	4.879	ACKR1,ACKR2,ADCY10,ADD2,ADORA2A,AGER,AGT,AIF1,APOA1,ATRN,BMP4,C1QBP,C3,C5,C5AR2,CAMP,CCL14,CCL15,CCL16,CCL17,CCL18,CCL19,CCL20,CCL22,CCL27,CCL28,CCL3L1,CCL5,CCR2,CCR4,CCR5,CCR7,CCR8,CD2,CD226,CD28,CD38,CD40LG,CD48,CFH,CFHR1,CMKLR1,CREB3,CSF2,CSF2RA,CTSG,CXCL1,CXCL11,CXCL12,CXCR1,CYTL1,DDR1,DEFB1,DEK,EFNB1,ENPP2,EZR,F2,F2RL1,F7,FASLG,FGF2,FYB1,FYN,GDF15,GDF2,GNAO1,GPR183,HGF,HRAS,HSPD1,ICOS,IL16,I…
Oxidation of lipid	6.26e-07	4.421	ABCD2,ACAA1,ACOX1,ADH1C,ADH4,AKR1C1/AKR1C2,AKR1C4,ALDH1A1,APOA1,BCL2,BDH2,CYP1A1,CYP1A2,CYP2C19,CYP2C8,CYP2C9,CYP2D6,CYP3A4,CYP3A5,EHHADH,HAO1,HAO2,HMGCS2,HPGD,HSD17B2,HSD17B6,LCAT,LEP,P2RX7,PHYH,PPARGC1A,RDH16,RDH5,UCP3
Mobilization of Ca2+	1.49e-05	4.4	ADORA2A,ADRA1A,ADRA1B,BMX,C3,C5,CALCR,CAMP,CASR,CCL17,CCL19,CCL22,CCL27,CCL28,CCL5,CCR2,CCR4,CCR5,CCR7,CCR8,CD19,CD2,CD244,CD247,CD28,CD38,CD3E,CD40LG,CD48,CD79B,CD84,CLEC4C,CMKLR1,CSF2,CX3CR1,CXCL1,CXCL11,CXCL12,CXCR1,CYSLTR2,EDN1,ESR1,F2,F2RL1,FFAR4,GHRL,GNAO1,GPR132,GPR35,GRAP2,GRM1,GRM5,GRM8,IL16,ITK,ITPR3,KLRC4-KLRK1/KLRK1,KLRF1,LAT,LILRB1,NCR3,NGF,NPY1R,P2RX7,POMC,PTPRC,RARRES2,SELL,TAS1R3,…
Cell movement of mononuclear leukocytes	4.3e-10	4.245	ACKR2,ADCY10,ADORA2A,AGER,AGT,AIF1,APOA1,ATRN,C5,CAMP,CCL14,CCL15,CCL16,CCL17,CCL18,CCL19,CCL20,CCL22,CCL27,CCL28,CCL3L1,CCL5,CCR2,CCR4,CCR5,CCR7,CCR8,CD2,CD226,CD28,CD40LG,CD48,CREB3,CSF2,CTSG,CXCL11,CXCL12,CXCR1,CYTL1,DEFB1,DEK,EFNB1,ENPP2,EZR,F2,FYB1,FYN,GNAO1,HGF,HRAS,HSPD1,ICOS,IL16,IL18,IL21,IL7R,ITGA2,ITGA3,ITGA4,ITGA6,ITGAL,JAK3,KCNK5,KCNN4,KNG1,LPA,MIF,MST1,NR3C1,PF4,PIK3CG,PLG,PRKCB,PRO…
Homing of leukocytes	1.24e-06	4.04	ACKR2,ADORA2A,AGER,AIF1,APOA1,C1QBP,C3,C5,C5AR2,CAMP,CCL14,CCL15,CCL16,CCL17,CCL18,CCL19,CCL20,CCL22,CCL27,CCL28,CCL3L1,CCL5,CCR2,CCR4,CCR5,CCR7,CD28,CMKLR1,CREB3,CSF2,CSF2RA,CTSG,CXCL1,CXCL11,CXCL12,CXCR1,CYTL1,DEFB1,DEK,F2RL1,F7,FASLG,FYN,GNAO1,GPR183,IL16,IL21,IL6,IL6R,ITGAL,JAK3,JAML,LPA,MIF,MST1,NR3C1,PF4,PIGR,PIK3CD,PIK3CG,PLA2G1B,PLG,PRAP1,PRKCB,RARRES2,S100A14,S100A8,SELE,SERPINA1,SERPINA…
Chemotaxis	5.57e-07	3.995	ACKR2,ADORA2A,AGER,AGT,AGTR1,AIF1,ANGPT1,ANXA2,APOA1,ARHGEF16,BIN2,BMP4,C1QBP,C3,C5,C5AR2,CAMP,CAV1,CCL14,CCL15,CCL16,CCL17,CCL18,CCL19,CCL20,CCL22,CCL27,CCL28,CCL3L1,CCL5,CCR2,CCR4,CCR5,CCR7,CCR8,CD28,CMKLR1,CREB3,CSF2,CSF2RA,CTSG,CX3CR1,CXCL1,CXCL11,CXCL12,CXCR1,CYTL1,DEFB1,DEK,DOCK2,EPHA2,F10,F2RL1,F7,FASLG,FGF2,FOSL1,FYN,GDNF,GNAO1,GPR132,GPR183,HGF,HMGB2,HRAS,IGF1,IL16,IL21,IL6,IL6R,ITGA2,IT…
Chemotaxis of leukocytes	1.82e-06	3.966	ACKR2,ADORA2A,AGER,AIF1,APOA1,C1QBP,C3,C5,C5AR2,CAMP,CCL14,CCL15,CCL16,CCL17,CCL18,CCL19,CCL20,CCL22,CCL27,CCL28,CCL3L1,CCL5,CCR2,CCR4,CCR5,CCR7,CD28,CMKLR1,CREB3,CSF2,CSF2RA,CTSG,CXCL1,CXCL11,CXCL12,CXCR1,CYTL1,DEFB1,DEK,F2RL1,F7,FASLG,FYN,GNAO1,GPR183,IL16,IL21,IL6,IL6R,ITGAL,JAML,LPA,MIF,MST1,NR3C1,PF4,PIGR,PIK3CD,PIK3CG,PLA2G1B,PLG,PRAP1,PRKCB,RARRES2,S100A14,S100A8,SELE,SERPINA1,SERPINA3,THB…
Binding of blood cells	9.95e-12	3.944	A2M,ADAM9,ADORA2A,AGER,ANGPT2,APCS,APOA4,APOE,APOH,ATRN,C3,C5,C5AR2,CAMP,CCL15,CCL17,CCL19,CCL20,CCL22,CCL28,CCL5,CD2,CD24,CD40LG,CD48,CD55,CD6,CFH,CFHR1,CFP,CR1,CR2,CSF2,CTLA4,CTSG,CXCL11,CXCL12,CXCR1,DMBT1,EFNB1,EZR,F10,F12,F2,F3,F5,F9,FGA,FGF2,FUT7,FYB1,GDF15,GP1BA,HGF,HRAS,ICOS,IL18,IL6,IL6R,IL6ST,IL7R,ITGA2,ITGA2B,ITGA4,ITGA6,ITGAD,ITGAL,JAK3,KCNK5,KLRC4-KLRK1/KLRK1,KNG1,L1CAM,LRP8,LTF,MARCO…
Homing of blood cells	7.07e-07	3.934	ACKR2,ADORA2A,AGER,AIF1,APOA1,BMP4,C1QBP,C3,C5,C5AR2,CAMP,CCL14,CCL15,CCL16,CCL17,CCL18,CCL19,CCL20,CCL22,CCL27,CCL28,CCL3L1,CCL5,CCR2,CCR4,CCR5,CCR7,CD28,CMKLR1,CREB3,CSF2,CSF2RA,CTSG,CXCL1,CXCL11,CXCL12,CXCR1,CYTL1,DEFB1,DEK,F2RL1,F7,FASLG,FYN,GNAO1,GPR183,IL16,IL21,IL6,IL6R,ITGAL,JAK3,JAML,LPA,MIF,MST1,NR3C1,PF4,PIGR,PIK3CD,PIK3CG,PLA2G1B,PLG,PRAP1,PRKCB,RARRES2,S100A14,S100A8,SELE,SERPINA1,SE…
Synthesis of lipid	3.99e-08	3.857	ACAT1,ACSL1,AGER,AGK,AGT,AGTR1,AKR1D1,ALOX15,ANG,ANPEP,APOA1,APOA2,APOA4,APOA5,APOC1,APOC2,APOC3,APOE,ATP8B1,B3GALT1,BAAT,BCL2,BMP2,BMP4,BMP5,BMP6,BRCA1,BSCL2,C3,C5,C5AR2,CACNA1H,CAMP,CASR,CAV1,CCL5,CD40LG,CD9,CDS1,CERS6,CES1,CETP,CLU,CNKSR1,CNTFR,CSF2,CXCL1,CYP11A1,CYP1A1,CYP21A2,CYP24A1,CYP27B1,CYP39A1,CYP3A4,CYP4A11,CYP4F2,CYP7A1,DGAT2,DHCR24,DHRS11,EDN1,ELOVL2,ELOVL7,ENPP2,F2,F2RL1,FADS1,FAM2…
Homing of cells	5.53e-07	3.732	ACKR2,ADORA2A,AGER,AGT,AGTR1,AIF1,ANGPT1,ANXA2,APOA1,ARHGEF16,BIN2,BMP4,C1QBP,C3,C5,C5AR2,CAMP,CAV1,CCL14,CCL15,CCL16,CCL17,CCL18,CCL19,CCL20,CCL22,CCL27,CCL28,CCL3L1,CCL5,CCR2,CCR4,CCR5,CCR7,CCR8,CD28,CMKLR1,CREB3,CSF2,CSF2RA,CTSG,CX3CR1,CXCL1,CXCL11,CXCL12,CXCR1,CYTL1,DEFB1,DEK,DOCK2,EPHA2,F10,F2RL1,F7,FASLG,FGF2,FOSL1,FYN,GDNF,GNAO1,GPR132,GPR183,HGF,HMGB2,HRAS,IGF1,IL16,IL21,IL6,IL6R,ITGA2,IT…
Metabolism of terpenoid	1.1e-16	3.706	ACAA1,ADH4,AKR1B10,AKR1C1/AKR1C2,AKR1C4,AKR1D1,ALDH8A1,ANGPTL3,APOA1,APOA4,APOB,APOE,BCO2,BMP2,BMP4,BMP5,BMP6,CACNA1H,CAV1,CEL,CES1,CETP,CYP11A1,CYP1A1,CYP1A2,CYP21A2,CYP24A1,CYP27B1,CYP2A6 (includes others),CYP2B6,CYP2C19,CYP2C8,CYP2C9,CYP2D6,CYP2E1,CYP3A4,CYP3A5,CYP3A7,CYP46A1,CYP4F2,DHCR24,FGF2,GSTA1,HGF,HSD17B14,IGF1,IGF2,ITGA6,LCAT,LRAT,MSMO1,MVK,NPC1L1,NR0B2,NR1I2,PHYH,PPARGC1A,RARRES2,RBP1…
Adhesion of blood cells	1.74e-10	3.689	A2M,ADAM9,ADORA2A,AGER,ANGPT2,APCS,APOA4,APOE,APOH,ATRN,C3,C5,C5AR2,CAMP,CCL15,CCL17,CCL19,CCL20,CCL22,CCL28,CCL5,CD2,CD40LG,CD48,CD55,CD6,CFH,CFHR1,CFP,CR1,CR2,CSF2,CTSG,CXCL12,CXCR1,DMBT1,EZR,F10,F2,F3,FGA,FYB1,GDF15,GP1BA,HGF,HRAS,ICOS,IL18,IL6,IL6R,IL6ST,IL7R,ITGA2,ITGA2B,ITGA4,ITGA6,ITGAD,ITGAL,JAK3,KCNK5,L1CAM,LRP8,LTF,MARCO,MRC1,NR3C1,ORM1,P2RX7,P2RY12,PF4,PROC,RIPOR2,RLN2,S100A8,SELE,SELL…
Transport of molecule	1.97e-11	3.641	A2M,ABCA12,ABCA4,ABCA5,ABCA8,ABCB11,ABCB4,ABCC11,ABCC2,ABCC6,ABCC9,ABCG2,ABCG5,ABCG8,ACTN2,ADAM9,ADHFE1,ADRA2B,AFM,AGK,AGT,AKR1C1/AKR1C2,AKR1C4,ALYREF,ANG,ANGPT2,ANKRD1,ANO5,APOA1,APOA2,APOA4,APOA5,APOB,APOC1,APOC2,APOC3,APOE,APOH,APOM,AQP4,AQP9,AR,ARL4D,ASIC2,ASIC3,ATP1A1,ATP1A2,ATP1A4,ATP1B1,ATP2A1,ATP2B2,ATP6V1B1,ATP8B1,BEST1,BMP2,BMP4,BMP6,C1QTNF3,C3,C5AR2,CACNA1D,CACNA1H,CACNA1S,CACNB3,CALCR…
Fatty acid metabolism	1.19e-10	3.608	ABCA12,ABCA4,ABCA5,ABCB11,ABCB4,ABCC11,ABCC2,ABCC6,ABCD2,ABCG2,ABCG5,ABCG8,ACAA1,ACACB,ACAT1,ACOT1,ACOT2,ACOX1,ACSL1,AGER,AGT,AKR1C1/AKR1C2,AKR1C4,ALDH5A1,ALOX15,ANGPTL3,APOA1,APOA2,APOA4,APOA5,APOB,APOC1,APOC2,APOC3,APOE,APOH,APOM,ATP8B1,B3GALT1,BAAT,BCL2,BRCA1,C5,CAMP,CAV1,CCL5,CCR2,CD40LG,CD9,CES2,CETP,CLU,CNTFR,CSF2,CXCL1,CYP1A1,CYP1A2,CYP2C8,CYP2C9,CYP3A4,CYP4A11,CYP4F11,CYP4F2,EDN1,ELOVL2,E…
Binding of leukocytes	3.2e-09	3.544	A2M,ADAM9,ADORA2A,AGER,ANGPT2,APOA4,APOE,APOH,ATRN,C5,C5AR2,CAMP,CCL15,CCL17,CCL19,CCL20,CCL22,CCL28,CCL5,CD2,CD40LG,CD48,CD6,CFH,CFHR1,CFP,CSF2,CTLA4,CTSG,CXCL11,CXCL12,CXCR1,EZR,F2,F3,FGA,FGF2,FUT7,FYB1,GDF15,HGF,HRAS,ICOS,IL18,IL6,IL6R,IL6ST,IL7R,ITGA2,ITGA4,ITGA6,ITGAD,ITGAL,JAK3,KCNK5,KLRC4-KLRK1/KLRK1,LTF,MARCO,MRC1,NR3C1,ORM1,P2RX7,PF4,PROC,RIPOR2,RLN2,S100A8,SELE,SELL,SELP,SERPINA1,SERPIN…
Cell death	9.46e-09	3.452	ABCB4,ABCG2,ACER2,ACOX2,ACSM5,ADAMTSL4,ADGRG1,ADGRL2,ADI1,ADORA2A,ADORA2B,ADRA1A,AFAP1L2,AFP,AGAP2,AGER,AGT,AIFM3,AIMP2,AKR1B1,ALDH1A1,ALDH1L1,ALDH2,ALDOA,ALOX15,ANG,ANGPT1,ANGPT2,ANKRD1,ANPEP,ANXA2,APBB1,APOA1,APOB,APOBEC3B,APOC3,APOE,AR,AREG,ARG1,ARHGEF6,AS3MT,ASAH2,ASB2,ASCL1,ATAD3A,ATG3,ATP1A1,ATP1A4,ATP2A1,ATP2B2,AURKA,AURKB,AXIN2,BAAT,BACH2,BAG1,BCHE,BCL10,BCL2,BCL2L10,BCL2L14,BEX2,BIK,BIRC…
Inflammatory response	3.33e-08	3.435	ACKR2,ADORA2A,AFAP1L2,AGER,AGT,AGTR1,AHSG,AIF1,ALOX15,AOAH,APOA1,APOE,C1QBP,C1QTNF3,C3,C5,C5AR2,CAMP,CCL14,CCL15,CCL16,CCL17,CCL18,CCL19,CCL20,CCL22,CCL27,CCL28,CCL3L1,CCL3L3,CCL5,CCR2,CCR4,CCR5,CCR7,CD28,CD40LG,CDO1,CMKLR1,CPB2,CREB3,CRHBP,CSF2,CSF2RA,CTSG,CXCL1,CXCL11,CXCL12,CXCR1,CYP4F11,CYTL1,DEFB1,DEK,F2RL1,F7,FASLG,FYN,GATA3,GC,GHRL,GNAO1,GPER1,GPR183,GPR68,HDAC9,HSPD1,HYAL1,IL16,IL18,IL18R…
Metabolism of hormone	2.77e-06	3.427	AGT,AKR1C1/AKR1C2,AKR1C4,AKR1D1,BMP2,BMP4,BMP6,CORIN,CYP11A1,CYP1A1,CYP2C19,CYP3A4,CYP3A5,CYP3A7,ELOVL7,EPHX1,FGF2,GSTA1,HGF,HSD17B6,IGF1,IGF2,ITGA6,IYD,LEP,PCSK6,PPARGC1A,SLC22A1,SRD5A2,STC1,SULT1B1,TRERF1,UGT2B7
Migration of mononuclear leukocytes	9e-10	3.339	ACKR2,ADCY10,ADORA2A,AGER,AGT,C5,CAMP,CCL14,CCL17,CCL18,CCL19,CCL20,CCL22,CCL27,CCL28,CCL5,CCR4,CCR5,CCR7,CCR8,CD2,CD226,CD28,CD40LG,CD48,CSF2,CTSG,CXCL11,CXCL12,DEFB1,DEK,EFNB1,ENPP2,EZR,F2,FYB1,FYN,HGF,HRAS,HSPD1,ICOS,IL16,IL18,IL21,IL7R,ITGA2,ITGA3,ITGA4,ITGA6,ITGAL,JAK3,KCNK5,KCNN4,MIF,NR3C1,PIK3CG,PLG,PROC,RARRES2,RIPOR2,RLN2,SELE,SELL,SELP,SMPD1,SMPD2,STAB1,THBS1,TNFRSF6B,TNFSF14,VCAM1,ZAP70
Oxidation of hormone	8.74e-07	3.251	AKR1C1/AKR1C2,CYP1A1,CYP1A2,CYP2C19,CYP2C8,CYP2C9,CYP3A4,CYP3A5,HSD17B2,HSD17B6,RDH16,RDH5
Metabolism of phenol derivative	1.02e-08	3.201	CYP1A2,CYP2A6 (includes others),CYP2C19,CYP2C8,CYP2C9,CYP2D6,CYP2E1,CYP3A4,DBH,MAOB,PRKN,SNCAIP,SULT1A1,SULT1C2,UGT2B7
Activation of blood cells	3.83e-09	3.16	ADAM9,ADORA2A,APOE,C3,C5,CAMP,CCL5,CD19,CD1C,CD2,CD200,CD226,CD244,CD247,CD27,CD28,CD3E,CD40LG,CD48,CD7,CD84,CEACAM5,CLEC1B,CLEC2D,CLEC4M,CLEC7A,CPB2,CRYAA/CRYAA2,CSF2,CTLA4,CTSG,EDN1,F2,F2RL1,F5,FASLG,FCRL3,FOXP3,GC,GP1BA,HDAC9,HLA-DPA1,HLA-DPB1,HRG,HSPD1,ICOS,IL6,ITGA3,ITK,KIR3DL1,KLKB1,KLRC4-KLRK1/KLRK1,KLRD1,KLRF1,KNG1,LAT,LAX1,LBP,LGALS3BP,LGALS4,LILRB1,LTA,LY96,MR1,NCR1,NCR3,PF4,PIK3CD,PIK3…
Transport of nitrogenous base	3.84e-07	3.148	ABCC11,ABCC2,ABCG2,AQP9,PDZK1,SLC10A1,SLC17A1,SLC17A3,SLC22A1,SLC22A13,SLC23A1,SLC23A2,SLC28A1,SLC35F3,SLCO1B1,SLCO2B1
Adhesion of immune cells	3.09e-09	3.147	A2M,ADAM9,ADORA2A,AGER,ANGPT2,APOA4,APOE,APOH,ATRN,C5,C5AR2,CAMP,CCL15,CCL17,CCL19,CCL20,CCL22,CCL28,CCL5,CD2,CD40LG,CD48,CD6,CFH,CFHR1,CFP,CSF2,CTSG,CXCL12,CXCR1,EZR,F2,F3,FGA,FYB1,GDF15,HGF,HRAS,ICOS,IL18,IL6,IL6R,IL6ST,IL7R,ITGA2,ITGA4,ITGA6,ITGAD,ITGAL,JAK3,KCNK5,LTF,MARCO,MRC1,NR3C1,ORM1,P2RX7,PF4,PROC,RIPOR2,RLN2,S100A8,SELE,SELL,SELP,SERPINA1,SERPING1,STAB1,THBS1,TLR5,TLR7,VCAM1,ZAP70
Ion homeostasis of cells	5.98e-10	3.085	AGTR1,APOA1,ATP1A1,ATP1A2,ATP1A4,ATP1B1,ATP6V1B1,BCL2,C3,C5,CACNA1D,CAMP,CASR,CAV1,CCL14,CCL15,CCL16,CCL18,CCL19,CCL20,CCL3L1,CCL5,CCR2,CCR4,CCR5,CCR7,CCR8,CD19,CD2,CD226,CD24,CD28,CD38,CD3E,CD52,CD55,CD7,CD8A,CIB2,CLCN5,CLDN16,CR1,CRACR2B,CXCL1,CXCL12,CYP27B1,CYSLTR1,DEFB1,EDN1,EGR1,ENPP1,ETS2,F2,F2RL1,F3,F7,FAM20A,FXYD2,FYN,GC,GDF2,GDNF,GPR132,GPR183,GPR35,HAMP,HFE2,HTR2B,IL18,ITK,KCNJ5,KCNMA1,…
Steroid metabolism	2.45e-15	3.064	ACAA1,AKR1B10,AKR1C1/AKR1C2,AKR1C4,AKR1D1,ANGPTL3,APOA1,APOA4,APOB,APOE,BMP2,BMP4,BMP5,BMP6,CACNA1H,CAV1,CEL,CES1,CETP,CYP11A1,CYP1A1,CYP1A2,CYP21A2,CYP24A1,CYP27B1,CYP2A6 (includes others),CYP2B6,CYP2C19,CYP2C8,CYP2C9,CYP2D6,CYP2E1,CYP3A4,CYP3A5,CYP3A7,CYP46A1,DHCR24,FGF2,GSTA1,HGF,HSD17B14,IGF1,IGF2,ITGA6,LCAT,MSMO1,MVK,NPC1L1,NR0B2,NR1I2,PPARGC1A,SERPINA1,SLCO1B1,SOAT2,ST8SIA1,STC1,SULT1A1,SUL…
Quantity of metal	1.15e-06	3.006	A2M,ACKR2,ADRA1A,AGT,AGTR1,APOC3,ATP2A1,ATP2B2,BCL2,C3,C5,CACNA1D,CALCR,CASR,CCL19,CCL3L3,CCL5,CCR4,CCR5,CCR8,CD2,CD247,CD28,CD8A,CHRM2,CP,CPM,CSF2,CXCL11,CXCL12,CXCR1,CYP2D6,CYSLTR2,EDN1,F2,F2RL1,FGF2,FXYD2,GCGR,GHRL,GNRH1,GPER1,GRM1,HGF,HSP90AA1,IL6,KNG1,L1CAM,LIME1,LTA,LYZ,ORM1,OXT,P2RX7,P2RY1,PLG,POMC,PON1,PRKCB,PRND,PROC,PRSS3,PTH1R,PTPRC,S100A1,S100A8,SELE,SELL,SELP,SHB,SIGMAR1,SMPD1,SPINT2…
Homing of mononuclear leukocytes	1.33e-05	2.988	ACKR2,ADORA2A,AIF1,APOA1,CAMP,CCL14,CCL15,CCL16,CCL17,CCL18,CCL19,CCL20,CCL22,CCL27,CCL28,CCL3L1,CCL5,CCR2,CCR4,CCR5,CCR7,CREB3,CSF2,CTSG,CXCL11,CXCL12,CXCR1,CYTL1,DEFB1,DEK,FYN,GNAO1,IL16,IL21,ITGAL,JAK3,LPA,MIF,MST1,NR3C1,PF4,PIK3CG,PLG,PRKCB,S100A14,SELE,SERPINA3,THBS1,TNFSF14
Flux of Ca2+	3.32e-09	2.974	APOA1,BCL2,C3,C5,CACNA1D,CAMP,CAV1,CCL14,CCL15,CCL16,CCL18,CCL19,CCL20,CCL3L1,CCL5,CCR2,CCR5,CCR8,CD19,CD2,CD226,CD28,CD38,CD3E,CD7,CD8A,CR1,CRACR2B,CXCL1,CXCL12,DEFB1,EGR1,ETS2,F2,F2RL1,F3,F7,GC,GDNF,GPR132,GPR183,IL18,ITK,KCNJ5,LAT,LAX1,LILRB1,MAPK11,MMP1,MS4A1,NR3C1,P2RX3,P2RX7,P2RY1,PDE5A,PLCG2,PTPRC,RIC3,SCGN,SERPINA1,SLA2,TNFRSF8,TRPA1,TRPV1,TRPV4,WT1
Conjugation of eicosanoid	1.76e-07	2.97	LTC4S,UGT1A1,UGT1A3,UGT1A4,UGT1A7 (includes others),UGT2B10,UGT2B11,UGT2B4,UGT2B7
Synthesis of terpenoid	1.55e-06	2.938	AGT,AGTR1,AKR1D1,APOA1,ATP8B1,BAAT,BMP2,BMP4,BMP5,BMP6,CACNA1H,CAV1,CES1,CETP,CYP11A1,CYP1A1,CYP21A2,CYP24A1,CYP27B1,CYP39A1,CYP7A1,DHCR24,DHRS11,ELOVL7,FGF2,FGFR4,GSTA1,HGF,IGF1,IGF2,ITGA6,LCAT,LEP,MVK,NPC1L1,NR1H4,PPARGC1A,RBP1,RDH5,SERPINA1,SLC22A1,SLC27A5,SLCO1B1,SRD5A3,ST8SIA1,STC1,TFCP2L1,TRERF1
Oxidation of amine	1.48e-06	2.935	CYP1A2,CYP2C19,CYP2C8,CYP2C9,CYP2D6,CYP2E1,CYP3A4,FMO3,MAOB
Quantity of metal ion	1.87e-07	2.925	A2M,ACKR2,ADRA1A,AGT,AGTR1,APOC3,ATP2A1,ATP2B2,BCL2,C3,C5,CACNA1D,CALCR,CASR,CCL19,CCL3L3,CCL5,CCR4,CCR5,CCR8,CD2,CD247,CD28,CD8A,CHRM2,CPM,CSF2,CXCL11,CXCL12,CXCR1,CYP2D6,CYSLTR2,EDN1,F2,F2RL1,FGF2,FXYD2,GCGR,GHRL,GNRH1,GPER1,GRM1,HGF,HSP90AA1,IL6,KNG1,L1CAM,LIME1,LTA,LYZ,ORM1,OXT,P2RX7,P2RY1,PLG,POMC,PRKCB,PRND,PROC,PRSS3,PTH1R,PTPRC,S100A1,S100A8,SELE,SELL,SELP,SHB,SIGMAR1,SMPD1,SPINT2,TAS2R4,…
Quantity of Ca2+	3.47e-07	2.925	A2M,ACKR2,ADRA1A,AGT,AGTR1,APOC3,ATP2A1,ATP2B2,BCL2,C3,C5,CACNA1D,CALCR,CASR,CCL19,CCL3L3,CCL5,CCR4,CCR5,CCR8,CD2,CD247,CD28,CD8A,CHRM2,CPM,CSF2,CXCL11,CXCL12,CXCR1,CYSLTR2,EDN1,F2,F2RL1,FGF2,GCGR,GHRL,GNRH1,GPER1,GRM1,HGF,HSP90AA1,IL6,KNG1,L1CAM,LIME1,LTA,LYZ,ORM1,OXT,P2RX7,P2RY1,PLG,POMC,PRKCB,PRND,PROC,PRSS3,PTH1R,PTPRC,S100A1,S100A8,SELE,SELL,SELP,SHB,SIGMAR1,SMPD1,SPINT2,TAS2R4,TPSAB1/TPSB2,…
Interaction of mononuclear leukocytes	1.16e-05	2.906	ANGPT2,ATRN,CCL15,CCL17,CCL19,CCL20,CCL22,CCL28,CCL5,CD2,CD40LG,CD48,CD6,CTLA4,CXCL11,CXCL12,CXCR1,EZR,F2,FGF2,FUT7,FYB1,HGF,HRAS,ICOS,IL6,IL6R,IL6ST,IL7R,ITGA2,ITGA4,ITGAL,JAK3,KCNK5,KLRC4-KLRK1/KLRK1,NR3C1,PROC,RIPOR2,SELE,SELL,SELP,SH2D1A,THBS1,VCAM1,ZAP70
Chemotaxis of mononuclear leukocytes	2.01e-05	2.897	ACKR2,ADORA2A,AIF1,APOA1,CAMP,CCL14,CCL15,CCL16,CCL17,CCL18,CCL19,CCL20,CCL22,CCL27,CCL28,CCL3L1,CCL5,CCR2,CCR4,CCR5,CCR7,CREB3,CSF2,CTSG,CXCL11,CXCL12,CXCR1,CYTL1,DEFB1,DEK,FYN,GNAO1,IL16,IL21,ITGAL,LPA,MIF,MST1,NR3C1,PF4,PIK3CG,PLG,PRKCB,S100A14,SELE,SERPINA3,THBS1,TNFSF14
Necrosis	1.38e-07	2.887	ABCB4,ABCG2,ACER2,ACSM5,ADGRL2,ADI1,ADORA2A,ADORA2B,AFAP1L2,AFP,AGAP2,AGER,AGT,AIFM3,AIMP2,AKR1B1,ALDH1A1,ALDH1L1,ALDH2,ALOX15,ANG,ANGPT2,ANKRD1,ANPEP,ANXA2,APOA1,APOB,APOBEC3B,APOC3,APOE,AR,AREG,ARG1,ARHGEF6,AS3MT,ASAH2,ATG3,ATP1A1,ATP1A4,ATP2A1,ATP2B2,AURKA,AURKB,BACH2,BAG1,BCHE,BCL10,BCL2,BCL2L10,BCL2L14,BEX2,BIK,BIRC5,BLID,BMF,BMP2,BMP4,BMP5,BMP6,BMX,BRCA1,BTC,BUB1,BUB1B,C3,C5,CABLES1,CALCR,C…
Flux of ion	1.15e-09	2.878	APOA1,BCL2,C3,C5,CACNA1D,CAMP,CAV1,CCL14,CCL15,CCL16,CCL18,CCL19,CCL20,CCL3L1,CCL5,CCR2,CCR5,CCR8,CD19,CD2,CD226,CD28,CD38,CD3E,CD7,CD8A,CLCN5,CR1,CRACR2B,CXCL1,CXCL12,DEFB1,EGR1,ETS2,F2,F2RL1,F3,F7,FXYD2,FYN,GC,GDNF,GPR132,GPR183,IL18,ITK,KCNJ5,KCNQ1,LAT,LAX1,LILRB1,MAPK11,MMP1,MS4A1,NR3C1,P2RX3,P2RX7,P2RY1,PDE5A,PLCG2,PTPRC,RIC3,SCGN,SERPINA1,SLA2,SLC9A5,TNFRSF8,TRPA1,TRPV1,TRPV4,WNK4,WT1
Conjugation of 12-hydroxyeicosatetraenoic acid	9.9e-07	2.828	UGT1A1,UGT1A3,UGT1A4,UGT1A7 (includes others),UGT2B10,UGT2B11,UGT2B4,UGT2B7
Modification of retinaldehyde	2.3e-05	2.828	ADH4,ALDH1A1,CYP1A1,CYP1A2,CYP2C19,CYP2C8,CYP2C9,CYP2D6,RDH16
Activation of leukocytes	5.8e-09	2.825	ADAM9,ADORA2A,APOE,C3,C5,CAMP,CCL5,CD19,CD1C,CD2,CD200,CD226,CD244,CD247,CD27,CD28,CD3E,CD40LG,CD48,CD7,CD84,CEACAM5,CLEC2D,CLEC4M,CLEC7A,CPB2,CRYAA/CRYAA2,CSF2,CTLA4,EDN1,F2RL1,F5,FASLG,FCRL3,FOXP3,GC,HDAC9,HLA-DPA1,HLA-DPB1,HSPD1,ICOS,IL6,ITGA3,ITK,KIR3DL1,KLKB1,KLRC4-KLRK1/KLRK1,KLRD1,KLRF1,KNG1,LAT,LAX1,LBP,LGALS3BP,LGALS4,LILRB1,LTA,LY96,MR1,NCR1,NCR3,PF4,PIK3CD,PIK3CG,PIP5K1B,PLA2G2A,PLG,PM…
Synthesis of steroid	1.74e-07	2.818	AGT,AGTR1,AKR1D1,APOA1,ATP8B1,BAAT,BMP2,BMP4,BMP5,BMP6,CACNA1H,CAV1,CES1,CETP,CYP11A1,CYP1A1,CYP21A2,CYP24A1,CYP27B1,CYP39A1,CYP7A1,DHCR24,DHRS11,ELOVL7,FGF2,FGFR4,GSTA1,HGF,IGF1,IGF2,ITGA6,LCAT,LEP,MVK,NPC1L1,NR1H4,PPARGC1A,SERPINA1,SLC22A1,SLC27A5,SLCO1B1,ST8SIA1,STC1,TFCP2L1,TRERF1
Cell movement of lymphocytes	8.95e-09	2.802	ACKR2,ADORA2A,CAMP,CCL14,CCL17,CCL18,CCL19,CCL20,CCL22,CCL27,CCL28,CCL5,CCR2,CCR4,CCR5,CCR7,CCR8,CD2,CD226,CD28,CD48,CTSG,CXCL11,CXCL12,DEFB1,DEK,EFNB1,ENPP2,EZR,F2,FYB1,FYN,GNAO1,HGF,HRAS,HSPD1,ICOS,IL16,IL18,IL21,IL7R,ITGA2,ITGA3,ITGA4,ITGA6,ITGAL,JAK3,KCNK5,KCNN4,MIF,NR3C1,PF4,PIK3CG,PROC,RARRES2,RIPOR2,SELE,SELL,SELP,SMPD1,SMPD2,STAB1,THBS1,TNFRSF6B,TNFSF14,ZAP70
Binding of mononuclear leukocytes	9.4e-06	2.78	ANGPT2,CCL15,CCL17,CCL19,CCL20,CCL22,CCL28,CCL5,CD2,CD40LG,CD48,CD6,CTLA4,CXCL11,CXCL12,CXCR1,EZR,F2,FGF2,FUT7,FYB1,HGF,HRAS,ICOS,IL6,IL6R,IL6ST,IL7R,ITGA2,ITGA4,ITGAL,JAK3,KCNK5,KLRC4-KLRK1/KLRK1,NR3C1,PROC,RIPOR2,SELE,SELL,SELP,SH2D1A,THBS1,VCAM1,ZAP70
Cell movement of lymphatic system cells	7.57e-09	2.756	ACKR2,ADORA2A,CAMP,CCL14,CCL17,CCL18,CCL19,CCL20,CCL22,CCL27,CCL28,CCL5,CCR2,CCR4,CCR5,CCR7,CCR8,CD2,CD226,CD28,CD48,CTSG,CXCL11,CXCL12,DDR1,DEFB1,DEK,EFNB1,ENPP2,EZR,F2,FGF2,FYB1,FYN,GNAO1,HGF,HRAS,HSPD1,ICOS,IL16,IL18,IL21,IL6,IL7R,ITGA2,ITGA3,ITGA4,ITGA6,ITGA9,ITGAL,JAK3,KCNK5,KCNN4,MIF,NR3C1,PF4,PIK3CG,PROC,RARRES2,RIPOR2,SELE,SELL,SELP,SMPD1,SMPD2,STAB1,THBS1,TNFRSF6B,TNFSF14,ZAP70
Cellular homeostasis	9.03e-06	2.74	ACTN2,AGER,AGTR1,AIFM3,ALDOA,ANGPT1,APOA1,ATG2B,ATP1A1,ATP1A2,ATP1A4,ATP1B1,ATP2A1,ATP6V1B1,AURKA,BCL2,BCO2,BIRC5,BMF,BMP4,C19orf12,C3,C5,CA9,CACNA1D,CACNA1H,CAMP,CAPN3,CASR,CAT,CAV1,CCL14,CCL15,CCL16,CCL18,CCL19,CCL20,CCL28,CCL3L1,CCL5,CCND1,CCR2,CCR4,CCR5,CCR7,CCR8,CD19,CD2,CD226,CD24,CD27,CD28,CD38,CD3D,CD3E,CD52,CD55,CD6,CD69,CD7,CD8A,CDKN1A,CHEK1,CHMP4C,CHMP5,CHRNA1,CIB2,CLCN5,CLDN16,CLDN2,C…
Aggregation of cells	3.16e-06	2.729	ACTG1,ADAM15,AGER,APCS,ATRN,CANT1,CCR4,CD2,CD40LG,CD6,CD9,CDH2,CDH3,CDKN1A,CEACAM5,CES1,CFH,CLEC1B,COL14A1,CXCL12,CYP2C19,DMBT1,DSC2,DSG2,F12,F2,FGA,FGB,FGF2,FGG,GP1BA,HGF,HSPB1,IL6,ITGA2,ITGA2B,ITGAL,KNG1,MMP7,MST1R,NCAM1,NRG1,P2RY1,P2RY12,PIK3CG,PLCB3,PLG,PLPP3,PROC,SELL,SELP,SERPINE2,SERPINF1,TCF7L2,THBS1,THPO,TLR7,TMIGD2,VCAM1
Binding of lymphatic system cells	3.39e-06	2.728	CCL17,CCL19,CCL20,CCL22,CCL28,CCL5,CD2,CD48,CD6,CTLA4,CXCL11,CXCL12,EZR,F2,FUT7,FYB1,HGF,HRAS,ICOS,IL6,IL6R,IL6ST,IL7R,ITGA2,ITGA4,ITGAL,JAK3,KCNK5,KLRC4-KLRK1/KLRK1,NR3C1,PROC,RIPOR2,SELE,SELL,SELP,SH2D1A,THBS1,THPO,VCAM1,ZAP70
Esterification of cholesterol	1.73e-05	2.724	AGT,AGTR1,APOA1,APOA2,APOA4,APOC1,APOE,C3,CAV1,LCAT,LIPC,MTTP,SOAT2
Esterification of lipid	2.92e-07	2.706	ACAT1,AGT,AGTR1,APOA1,APOA2,APOA4,APOC1,APOE,C3,CAV1,CEL,GK,LCAT,LIPC,LRAT,MTTP,PCK1,SOAT2
Interaction of lymphocytes	8.77e-07	2.688	ATRN,CCL17,CCL19,CCL20,CCL22,CCL28,CCL5,CD2,CD48,CD6,CTLA4,CXCL11,CXCL12,EZR,F2,FUT7,FYB1,HGF,HRAS,ICOS,IL6,IL6R,IL6ST,IL7R,ITGA2,ITGA4,ITGAL,JAK3,KCNK5,KLRC4-KLRK1/KLRK1,NR3C1,PROC,RIPOR2,SELE,SELL,SELP,SH2D1A,THBS1,VCAM1,ZAP70
Lymphocyte migration	7.37e-10	2.628	ACKR2,ADORA2A,CAMP,CCL14,CCL17,CCL18,CCL19,CCL20,CCL22,CCL27,CCL28,CCL5,CCR4,CCR5,CCR7,CCR8,CD2,CD226,CD28,CD48,CTSG,CXCL11,CXCL12,DEFB1,DEK,EFNB1,ENPP2,EZR,F2,FYB1,FYN,HGF,HRAS,HSPD1,ICOS,IL16,IL18,IL21,IL7R,ITGA2,ITGA3,ITGA4,ITGA6,ITGAL,JAK3,KCNK5,KCNN4,MIF,NR3C1,PIK3CG,PROC,RARRES2,RIPOR2,SELE,SELL,SELP,SMPD1,SMPD2,STAB1,THBS1,TNFRSF6B,TNFSF14,ZAP70
Flux of inorganic cation	1.34e-09	2.611	APOA1,BCL2,C3,C5,CACNA1D,CAMP,CAV1,CCL14,CCL15,CCL16,CCL18,CCL19,CCL20,CCL3L1,CCL5,CCR2,CCR5,CCR8,CD19,CD2,CD226,CD28,CD38,CD3E,CD7,CD8A,CR1,CRACR2B,CXCL1,CXCL12,DEFB1,EGR1,ETS2,F2,F2RL1,F3,F7,GC,GDNF,GPR132,GPR183,IL18,ITK,KCNJ5,KCNQ1,LAT,LAX1,LILRB1,MAPK11,MMP1,MS4A1,NR3C1,P2RX3,P2RX7,P2RY1,PDE5A,PLCG2,PTPRC,RIC3,SCGN,SERPINA1,SLA2,SLC9A5,TNFRSF8,TRPA1,TRPV1,TRPV4,WNK4,WT1
Migration of lymphatic system cells	7.24e-10	2.585	ACKR2,ADORA2A,CAMP,CCL14,CCL17,CCL18,CCL19,CCL20,CCL22,CCL27,CCL28,CCL5,CCR4,CCR5,CCR7,CCR8,CD2,CD226,CD28,CD48,CTSG,CXCL11,CXCL12,DDR1,DEFB1,DEK,EFNB1,ENPP2,EZR,F2,FGF2,FYB1,FYN,HGF,HRAS,HSPD1,ICOS,IL16,IL18,IL21,IL6,IL7R,ITGA2,ITGA3,ITGA4,ITGA6,ITGA9,ITGAL,JAK3,KCNK5,KCNN4,MIF,NR3C1,PIK3CG,PROC,RARRES2,RIPOR2,SELE,SELL,SELP,SMPD1,SMPD2,STAB1,THBS1,TNFRSF6B,TNFSF14,ZAP70
Conjugation of lipid	2.88e-07	2.563	GSTP1,LTC4S,UGT1A1,UGT1A3,UGT1A4,UGT1A7 (includes others),UGT2B10,UGT2B11,UGT2B4,UGT2B7
Binding of lymphocytes	8.1e-07	2.55	CCL17,CCL19,CCL20,CCL22,CCL28,CCL5,CD2,CD48,CD6,CTLA4,CXCL11,CXCL12,EZR,F2,FUT7,FYB1,HGF,HRAS,ICOS,IL6,IL6R,IL6ST,IL7R,ITGA2,ITGA4,ITGAL,JAK3,KCNK5,KLRC4-KLRK1/KLRK1,NR3C1,PROC,RIPOR2,SELE,SELL,SELP,SH2D1A,THBS1,VCAM1,ZAP70
Binding of leukemia cell lines	1.57e-06	2.46	ADAM28,ALOX15,ANXA2,APOH,BCL10,CCL15,CCR5,CD226,CD28,CLEC4G,CPB2,CXCL12,CXCR1,CYBB,CYTIP,F10,F2,FUT7,FYB1,FYB2,GDF15,GMFG,GP1BA,HRAS,IL6,ITGA3,ITGA4,ITGA6,ITGAL,KCNK5,KLRC4-KLRK1/KLRK1,LAT,NCL,PRMT1,PROS1,RASGRP2,RHOH,RLN2,SELE,SELL,SELP,SIGMAR1,THPO,TLR5,TNFRSF6B,TNFSF9,VCAM1,VTN,ZAP70
Demethylation of almotriptan	3.14e-05	2.449	CYP1A1,CYP1A2,CYP2C19,CYP2C8,CYP2D6,CYP3A4
Demethylation of imipramine	3.14e-05	2.449	CYP1A2,CYP2B6,CYP2C18,CYP2C19,CYP2D6,CYP3A4
Oxidation of 2-hydroxyestradiol	3.14e-05	2.449	CYP1A1,CYP1A2,CYP2C8,CYP2C9,CYP3A4,CYP3A5
Adhesion of mononuclear leukocytes	5.87e-06	2.406	ANGPT2,CCL17,CCL19,CCL20,CCL22,CCL28,CD2,CD40LG,CD48,CXCL12,CXCR1,EZR,F2,FYB1,HGF,HRAS,ICOS,IL6,IL6R,IL6ST,IL7R,ITGA2,ITGA4,ITGAL,JAK3,KCNK5,NR3C1,PROC,RIPOR2,SELE,SELL,SELP,THBS1,VCAM1,ZAP70
Hydroxylation of lipid	6.25e-06	2.399	CYP1A2,CYP2B6,CYP2C8,CYP2C9,CYP2E1,CYP3A4,CYP3A5,CYP4A11,CYP4F2,CYP4F3,FA2H,PHYH
Interaction of leukemia cell lines	1.98e-06	2.326	ADAM28,ALOX15,ANXA2,APOH,BCL10,CCL15,CCR5,CD226,CD28,CLEC4G,CPB2,CXCL12,CXCR1,CYBB,CYTIP,F10,F2,FUT7,FYB1,FYB2,GDF15,GMFG,GP1BA,HRAS,IL6,ITGA3,ITGA4,ITGA6,ITGAL,KCNK5,KLRC4-KLRK1/KLRK1,LAT,NCL,PRMT1,PROS1,RASGRP2,RHOH,RLN2,SELE,SELL,SELP,SIGMAR1,TBC1D10C,THPO,TLR5,TNFRSF6B,TNFSF9,VCAM1,VTN,ZAP70
Adhesion of lymphocytes	3.07e-07	2.326	CCL17,CCL19,CCL20,CCL22,CCL28,CD2,CD48,CXCL12,EZR,F2,FYB1,HGF,HRAS,ICOS,IL6,IL6R,IL6ST,IL7R,ITGA2,ITGA4,ITGAL,JAK3,KCNK5,NR3C1,PROC,RIPOR2,SELE,SELL,SELP,THBS1,VCAM1,ZAP70
Activation of cells	9.89e-11	2.32	ADAM9,ADORA2A,AGT,ANGPT1,APOE,AREG,BCL10,BMP2,C3,C5,CAMP,CCL5,CD19,CD1C,CD2,CD200,CD226,CD24,CD244,CD247,CD27,CD28,CD3E,CD40LG,CD48,CD7,CD84,CD8A,CD9,CEACAM5,CLEC12A,CLEC1B,CLEC2D,CLEC4M,CLEC7A,CPB2,CRYAA/CRYAA2,CSF2,CTLA4,CTSG,CXCL12,CXCR1,EDN1,ENPEP,F2,F2RL1,F3,F5,FASLG,FCRL3,FGF2,FOXP3,GC,GP1BA,HDAC9,HGF,HLA-DPA1,HLA-DPB1,HRG,HSPD1,ICOS,IGF1,IGF2,IL27,IL6,ITGA3,ITK,KIR3DL1,KLKB1,KLRC4-KLRK1/KL…
Interaction of T lymphocytes	2.63e-07	2.305	ATRN,CCL17,CCL19,CCL20,CCL22,CCL28,CCL5,CD2,CD48,CD6,CTLA4,CXCL11,CXCL12,EZR,F2,FUT7,FYB1,HGF,HRAS,ICOS,IL7R,ITGA2,ITGA4,ITGAL,JAK3,KLRC4-KLRK1/KLRK1,NR3C1,PROC,RIPOR2,SELE,SELL,SELP,THBS1,VCAM1,ZAP70
Metabolism of acylglycerol	1.02e-05	2.302	ANG,APOA2,APOA5,APOC3,APOE,APOH,BSCL2,C3,C5AR2,CDS1,CETP,CPS1,DGAT2,EPHX1,GK,IGF2,IL6,LIPC,LMF1,PNPLA3,PPARGC1A,SMPD1
Transport of lipid	1.5e-06	2.28	ABCA12,ABCA4,ABCA5,ABCB11,ABCB4,ABCC11,ABCC2,ABCC6,ABCG2,ABCG5,ABCG8,AKR1C1/AKR1C2,AKR1C4,APOA1,APOA2,APOA4,APOA5,APOB,APOC1,APOC2,APOC3,APOE,APOH,APOM,ATP8B1,CAV1,CCR2,CETP,CLU,CYP3A4,F2,IL6,LBP,LCAT,LEP,MFSD2A,MTTP,NPC1L1,PON1,PRELID3A,PRKN,SCD,SLC10A1,SLC6A13,SLCO1B1,SOAT2
Transport of ion	1.24e-07	2.279	ABCC11,ABCC2,ABCC9,ACTN2,ANO5,ASIC2,ATP1A1,ATP1A2,ATP1A4,ATP1B1,ATP2A1,ATP2B2,ATP6V1B1,BEST1,CACNA1D,CACNA1S,CACNB3,CCL5,CCR5,CDH23,CLCN4,CLIC5,CNTFR,F2RL1,FGF13,FHL1,FXYD1,FXYD3,FYN,GPD1L,HEPH,HVCN1,IGF1,KCNA2,KCNA3,KCNA5,KCNAB1,KCNAB3,KCND3,KCNIP2,KCNJ10,KCNJ3,KCNJ5,KCNJ8,KCNK1,KCNK5,KCNMA1,KCNN4,KCNQ4,NDRG2,NNT,P2RX7,PDZK1,PLP2,PRLR,RACGAP1,RAMP3,RHBG,SCN1B,SCN3B,SCN4B,SCN7A,SCN9A,SCNN1B,SCNN1…
Metabolism of terbinafine	5.58e-06	2.214	CYP1A2,CYP2B6,CYP2C19,CYP2C8,CYP2C9,CYP3A4,CYP3A5
Metabolism of imipramine	3.14e-05	2.207	CYP1A2,CYP2B6,CYP2C19,CYP2D6,CYP3A4,UGT1A4
Metabolism of estrogen	8.74e-07	2.2	CYP1A1,CYP1A2,CYP2C19,CYP2C9,CYP3A4,CYP3A5,CYP3A7,SULT1A1,SULT1E1,UGT1A1,UGT2B11,UGT2B4
Conversion of lipid	1.54e-06	2.181	ACOX1,AKR1C1/AKR1C2,AKR1C4,ALOX15,CAT,CETP,CFH,CR2,CYP1A1,CYP1A2,CYP2C19,CYP2C8,CYP2C9,CYP2D6,CYP2E1,CYP3A4,CYP3A7,CYP46A1,FADS1,GSTA2,GSTP1,H6PD,HPGD,HSD11B1,HSD17B6,LIPH,POMC,PON1,PRKN
Adhesion of T lymphocytes	3.69e-06	2.155	CCL17,CCL19,CCL20,CCL22,CD2,CD48,CXCL12,EZR,F2,FYB1,HGF,HRAS,ICOS,IL7R,ITGA2,ITGA4,ITGAL,JAK3,NR3C1,PROC,RIPOR2,SELE,SELL,SELP,THBS1,ZAP70
Binding of T lymphocytes	3.14e-07	2.151	CCL17,CCL19,CCL20,CCL22,CCL28,CCL5,CD2,CD48,CD6,CTLA4,CXCL11,CXCL12,EZR,F2,FUT7,FYB1,HGF,HRAS,ICOS,IL7R,ITGA2,ITGA4,ITGAL,JAK3,KLRC4-KLRK1/KLRK1,NR3C1,PROC,RIPOR2,SELE,SELL,SELP,THBS1,VCAM1,ZAP70
Transport of cation	5.95e-06	2.091	ABCC9,ACTN2,ASIC2,ATP1A1,ATP1A2,ATP1A4,ATP1B1,ATP2A1,ATP2B2,ATP6V1B1,CACNA1D,CACNA1S,CACNB3,CCL5,CCR5,CDH23,CNTFR,F2RL1,FGF13,FHL1,GPD1L,HEPH,HVCN1,IGF1,KCNA2,KCNA3,KCNA5,KCNAB1,KCNAB3,KCND3,KCNIP2,KCNJ10,KCNJ3,KCNJ5,KCNJ8,KCNK1,KCNK5,KCNMA1,KCNN4,KCNQ4,NDRG2,NNT,P2RX7,PDZK1,PRLR,RAMP3,RHBG,SCN1B,SCN3B,SCN4B,SCN7A,SCN9A,SCNN1B,SCNN1D,SLC12A2,SLC17A2,SLC17A4,SLC22A1,SLC22A3,SLC23A1,SLC44A4,SLC4A11…
Apoptosis	5.66e-06	2.035	ABCG2,ACSM5,ADAMTSL4,ADGRL2,ADI1,ADORA2A,ADORA2B,ADRA1A,AFAP1L2,AFP,AGAP2,AGER,AGT,AIFM3,AIMP2,AKR1B1,ALDH1A1,ALDH1L1,ALDH2,ALOX15,ANGPT1,ANGPT2,ANKRD1,ANPEP,APBB1,APOBEC3B,APOE,AR,AREG,ARG1,ARHGEF6,ASAH2,ASB2,ASCL1,ATAD3A,ATP2A1,ATP2B2,AURKA,AURKB,BACH2,BAG1,BCL10,BCL2,BCL2L10,BCL2L14,BEX2,BIK,BIRC5,BLID,BMF,BMP2,BMP4,BMP6,BMX,BRCA1,BTC,BUB1,C19orf12,C1QBP,C5,CABLES1,CALCR,CAMP,CAPN3,CASP12,CASP…
Shape change of leukocytes	2.94e-05	2.032	ATRN,CCL19,CCL5,CCR2,CD28,CSF2,CXCL12,FYB1,ICOS,KCNA3,KCNN4,KNG1,SELL,SMPD1,SMPD2,THBS1,VTN
Stimulation of cells	3.83e-06	2.018	AGT,BCL2,BTNL9,CAMP,CARD11,CAT,CAV1,CCL5,CD2,CD24,CD28,CD320,CD40LG,CHRNA1,CSF2,CTSG,EPHA2,F2,FASLG,HGF,HRAS,ICOS,IL18,IL21,IL6,KLRC4-KLRK1/KLRK1,KNG1,MUC1,NOS2,PDGFD,PLXNA4,PTPRC,SCN9A,SPTB,THBS1,TMIGD2,TNFSF9
Metabolism of pyrimidine base	2.3e-05	1.994	ALDH6A1,CYP2C19,CYP2C9,CYP2D6,CYP3A4,CYP3A5,DPYD,DPYS,GLDC
Secretion of molecule	3.97e-10	1.989	A2M,ABCA12,ABCB11,ABCB4,ADAM9,ADRA2B,AGK,AGT,ANG,ANGPT2,ANKRD1,APOA1,APOA4,APOB,APOC3,APOE,ARL4D,ATP8B1,BMP2,BMP4,BMP6,C1QTNF3,CASP4,CASR,CIDEB,CSF2,CTSG,CYP2E1,EDN1,EZR,F2,FBLN5,FFAR4,FGA,FGB,FGG,FOXP3,FST,GAPDH,GDNF,GHRL,GNRH1,HGF,HSD17B2,ICOS,IGF1,IL26,IL6,KCNJ5,KDM8,LEP,LIF,LILRB1,LIPC,MIF,MTTP,MYOM1,NGF,NLRP12,NRG1,OLFM2,P2RY12,PKM,PLA2G1B,PLAA,POMC,PRKCB,PRKN,RSAD2,SLC16A3,SLC2A1,SNCAIP,STE…
Modification of fluoxetine	3.14e-05	1.982	CYP1A2,CYP2C19,CYP2C8,CYP2C9,CYP2D6,CYP3A4
Activation of mononuclear leukocytes	4.97e-07	1.932	ADAM9,ADORA2A,CCL5,CD19,CD1C,CD2,CD200,CD226,CD244,CD247,CD27,CD28,CD3E,CD40LG,CD7,CEACAM5,CLEC2D,CLEC7A,CSF2,CTLA4,FASLG,FCRL3,FOXP3,HDAC9,HLA-DPA1,HLA-DPB1,HSPD1,ICOS,IL6,ITGA3,ITK,KIR3DL1,KLRC4-KLRK1/KLRK1,KLRD1,KLRF1,LAT,LAX1,LGALS4,LILRB1,LY96,MR1,NCR1,NCR3,PIK3CD,PIK3CG,PIP5K1B,PLA2G2A,PMEL,PRF1,PTPN22,PTPRC,SIRPG,SIT1,SLA2,SOCS2,TIGIT,TNFRSF13B,TNFRSF6B,TNFSF14,TNFSF9,VTCN1,ZAP70
Communication	7.74e-11	1.92	ADAP1,ADCY8,ADGRB1,ADGRB2,ADGRG1,ADORA2A,ADRA1A,ADRA1B,ADRA2B,AGER,AGRN,AGT,AGTR1,AKR1C1/AKR1C2,AMHR2,ANGPT1,ANGPT2,ANGPTL3,APOA1,APOC3,APOE,AR,AREG,ASAH2,ASB2,ASGR2,ASIC3,ASIP,BAG1,BLK,BMP2,BMX,C1QA,C3,C5,CAMK4,CAMP,CAPS,CASR,CCL15,CCL16,CCL17,CCL18,CCL19,CCL20,CCL22,CCL27,CCL5,CCR5,CCR7,CD19,CD2,CD226,CD244,CD28,CD3E,CD3G,CD70,CD79B,CHRNA1,CHRNA4,CLEC1A,CLEC1B,CLEC2D,CLEC7A,CLNK,CMKLR1,CRHBP,CR…
Communication of cells	1.12e-09	1.92	ADAP1,ADCY8,ADGRB1,ADGRB2,ADRA1A,ADRA1B,AGER,AGRN,AGT,AGTR1,AKR1C1/AKR1C2,AMHR2,ANGPT1,ANGPT2,ANGPTL3,APOA1,APOC3,APOE,AR,AREG,ASAH2,ASB2,ASGR2,ASIC3,ASIP,BAG1,BLK,BMX,C3,C5,CAMK4,CAMP,CAPS,CASR,CCL15,CCL16,CCL17,CCL18,CCL19,CCL20,CCL22,CCL5,CCR5,CCR7,CD19,CD2,CD226,CD244,CD28,CD3E,CD3G,CD70,CD79B,CHRNA1,CHRNA4,CLEC1A,CLEC1B,CLEC2D,CLEC7A,CLNK,CMKLR1,CRHBP,CRLF2,CTNND2,CXCL1,CXCL11,CXCL12,CXCR1,C…
Transport of metal ion	1.81e-06	1.893	ABCC9,ACTN2,ATP1A1,ATP1A2,ATP1A4,ATP1B1,ATP2A1,ATP2B2,CACNA1D,CACNA1S,CACNB3,CCL5,CCR5,CDH23,CNTFR,F2RL1,FGF13,FHL1,GPD1L,HEPH,IGF1,KCNA2,KCNA3,KCNA5,KCNAB1,KCNAB3,KCND3,KCNIP2,KCNJ10,KCNJ3,KCNJ5,KCNJ8,KCNK1,KCNK5,KCNMA1,KCNN4,KCNQ4,NDRG2,P2RX7,PRLR,RAMP3,SCN1B,SCN3B,SCN4B,SCN7A,SCN9A,SCNN1B,SCNN1D,SLC17A2,SLC17A4,SLC23A1,SLC4A11,SLC4A4,SLC9B2,STOML2,TRPC5,TRPV4,WNK3
Transport of inorganic cation	4.12e-06	1.893	ABCC9,ACTN2,ASIC2,ATP1A1,ATP1A2,ATP1A4,ATP1B1,ATP2A1,ATP2B2,ATP6V1B1,CACNA1D,CACNA1S,CACNB3,CCL5,CCR5,CDH23,CNTFR,F2RL1,FGF13,FHL1,GPD1L,HEPH,HVCN1,IGF1,KCNA2,KCNA3,KCNA5,KCNAB1,KCNAB3,KCND3,KCNIP2,KCNJ10,KCNJ3,KCNJ5,KCNJ8,KCNK1,KCNK5,KCNMA1,KCNN4,KCNQ4,NDRG2,NNT,P2RX7,PRLR,RAMP3,SCN1B,SCN3B,SCN4B,SCN7A,SCN9A,SCNN1B,SCNN1D,SLC17A2,SLC17A4,SLC23A1,SLC4A11,SLC4A4,SLC9B2,STOML2,TRPC5,TRPV4,WNK3
Hemostasis	3.72e-12	1.871	ADORA2A,APOA4,APOE,APOH,ASIC2,C3,C4BPB,CAV1,CCL22,CD24,CD40LG,CLEC1B,CLEC4M,CTSG,CXCL12,CYP2C9,CYP4F11,CYP4F2,EDN1,EFNB1,F10,F11,F12,F2,F2RL1,F2RL2,F3,F5,F7,F9,FGA,FGB,FGG,GGCX,GP1BA,GPI,HRG,IL6,ITGA2,ITGA2B,KLKB1,KNG1,L1CAM,LRP8,P2RY12,PF4,PLG,PROC,PROS1,SELP,SERPINE2,SPINT2,STAB2,TFPI,THBS1,THPO,TMPRSS6,VAV2
Metabolism of triacylglycerol	3.59e-06	1.843	APOA2,APOA5,APOC3,APOE,APOH,BSCL2,C3,C5AR2,CETP,CPS1,DGAT2,GK,IL6,LIPC,LMF1,PNPLA3,PPARGC1A,SMPD1
Cell movement	2.27e-11	1.823	A2M,ABI3,ACKR1,ACKR2,ACTN4,ADAM15,ADAM9,ADCY10,ADD2,ADI1,ADORA2A,AGAP2,AGER,AGK,AGT,AGTR1,AIF1,AJAP1,ANGPT1,ANGPT2,ANGPTL1,ANGPTL3,ANPEP,ANXA2,ANXA3,APBA1,APOA1,APOE,AR,AREG,ARHGAP11A,ARHGAP19,ARHGAP8/PRR5-ARHGAP8,ARHGEF16,ARHGEF6,ASCL1,ATP1A4,ATRN,AURKA,BAG1,BCL10,BCL11B,BEX4,BIN2,BMP10,BMP2,BMP4,BMP6,BRCA1,BTC,C1QBP,C3,C5,C5AR2,C5orf30,CA9,CACNA1D,CAMP,CARMIL2,CAT,CAV1,CCL14,CCL15,CCL16,CCL17,C…
Activation of lymphocytes	2.14e-07	1.818	ADORA2A,CCL5,CD19,CD1C,CD2,CD200,CD226,CD244,CD247,CD27,CD28,CD3E,CD40LG,CD7,CEACAM5,CLEC2D,CLEC7A,CSF2,CTLA4,FASLG,FCRL3,FOXP3,HDAC9,HLA-DPA1,HLA-DPB1,HSPD1,ICOS,IL6,ITGA3,ITK,KIR3DL1,KLRC4-KLRK1/KLRK1,KLRD1,KLRF1,LAT,LAX1,LILRB1,MR1,NCR1,NCR3,PIK3CD,PIK3CG,PIP5K1B,PLA2G2A,PMEL,PRF1,PTPN22,PTPRC,SIRPG,SIT1,SLA2,SOCS2,TIGIT,TNFRSF13B,TNFRSF6B,TNFSF9,VTCN1,ZAP70
Quantity of steroid	3.63e-06	1.814	ABCB11,ABCB4,ABCG5,ABCG8,AGT,ANGPTL3,APOA1,APOA5,APOE,ATP8B1,CAV1,CETP,CYP3A4,CYP3A5,DHCR24,GHR,GNRH1,HGF,HMGA1,IGF1,KNG1,LEP,LIPC,NPC1L1,POMC,SHBG,SLCO1B1,TCF7L2,UGT1A1,VNN1
Hematopoietic neoplasm	1.14e-10	1.804	ABCA10,ABCA12,ABCA9,ABCB11,ABCB4,ABCC11,ABCC9,ABCG2,ABCG5,ABCG8,ACAD11,ACER2,ACTG1,ACTN2,ADAM9,ADAMTS17,ADAMTSL3,ADCY1,ADD2,ADGRB1,ADORA2A,ADRA1A,ADRA1B,AFAP1L2,AGAP5 (includes others),AGTR1,AHNAK2,AIG1,AKAP2,ALDH1A1,ALDH4A1,ALPK3,ALPL,AMPH,ANGPT1,ANGPT2,ANK2,ANKRD20A4 (includes others),ANKRD53,ANKS1B,ANO5,ANPEP,ANXA2,APBA1,APCDD1,APOB,APOBEC3D,AQP7,ARHGAP9,ARL9,ASAP3,ASMTL-AS1,ASRGL1,ASXL3,ATG4D…
Cell death of blood cells	1.26e-07	1.782	AGER,ANPEP,APOB,AURKB,BCL2,BMP4,C3,C5,CAMK4,CAMP,CASP4,CAV1,CCL19,CCL5,CCR5,CCR7,CCR8,CD19,CD226,CD247,CD27,CD28,CD38,CD40LG,CD48,CD69,CD7,CD70,CD8A,CDK1,CLU,CR2,CSF2,CSF2RA,CTLA4,CXCL1,CXCL12,DEK,ESR1,ETS2,EZR,FASLG,FCRL3,FLT3,GIMAP5,GPR132,HGF,ICOS,IGF1,IL18,IL21,IL6,IL6R,IL7R,IRF4,ITGAL,ITPR3,JAK3,KLF4,KLRC4-KLRK1/KLRK1,LCN2,LEP,LEPR,LGALS2,LGALS4,LILRB1,LTF,MAP4K1,MS4A1,MX1,MYBL2,MYC,MZB1,NFA…
Secretion of steroid	1.11e-05	1.782	ABCB11,AGT,ANGPT2,ATP8B1,BMP4,BMP6,CTSG,FST,GHRL,GNRH1,IL6,KCNJ5,LEP,NGF,POMC,TGFA
Cell movement of lymphoma cell lines	1.03e-05	1.749	ARHGEF6,C5,CCL20,CCL22,CCR7,CXCL12,FGA,GCSAM,GPR132,HGF,IL6,LAMC2,NME1,PARVG,PRKCQ,RAPH1,SELL,TNFRSF8
Cytolysis	9.65e-07	1.739	ALDOA,BAAT,BCL2,C3,C5,C8A,C8B,C8G,C9,CAMP,CD226,CD244,CD48,CD52,CD55,CD8A,CFB,CFH,CFHR1,CFHR2,CFHR3,CFHR5,CFI,CR1,CR2,CSF2,CX3CR1,EPB42,F3,FASLG,FCGR1B,GPI,GPLD1,HLA-F,IL21,IMPDH1,IMPDH2,ISG15,KCNN4,KIR3DL1,KIR3DL2,KLRC4-KLRK1/KLRK1,KLRD1,LBP,LILRB1,LTA,LYZ,MS4A1,MUC1,MYC,NCR1,NR3C1,P2RY12,PF4,PKLR,PRF1,SPTB,SUSD4,TP53I11
T cell migration	1.93e-08	1.739	ACKR2,ADORA2A,CAMP,CCL14,CCL17,CCL18,CCL19,CCL20,CCL22,CCL27,CCL28,CCL5,CCR4,CCR5,CCR7,CCR8,CD28,CTSG,CXCL11,CXCL12,DEFB1,DEK,ENPP2,EZR,FYB1,FYN,HGF,HSPD1,ICOS,IL16,IL21,ITGA3,ITGA6,JAK3,KCNN4,MIF,NR3C1,PIK3CG,RIPOR2,SELP,SMPD1,SMPD2,STAB1,THBS1,TNFRSF6B,TNFSF14,ZAP70
Adhesion of tumor cell lines	1.13e-06	1.731	ACTN4,ADAM15,ADAM28,ADAM9,ALOX15,APOE,APOH,BCL10,C1QBP,CAV1,CCL15,CCND1,CD28,CD55,CD9,CDCP1,CDH2,CDH3,CFH,CPB2,CR2,CTNNA3,CXCL12,CYBB,CYTIP,DDR1,DSG2,E2F1,EFNB1,EPCAM,EPHA2,EPHB6,F10,F2,FBLN5,FGA,FUT7,FYB1,FYB2,GDF15,GMFG,GP1BA,HGF,HMMR,HRAS,HYAL1,ICOS,IGF1,IL18,IL6,ITGA2,ITGA3,ITGA4,ITGA6,ITGA9,ITGAL,KCNK5,KNG1,L1CAM,LAMA3,LAMC2,LAT,LEP,LGALS2,LGALS4,LIF,LTF,MAD2L1,MECOM,MET,MGAT5,MUC1,NEU4,NME1…
Transport of metal	1.23e-06	1.729	ABCC9,ACTN2,ATP1A1,ATP1A2,ATP1A4,ATP1B1,ATP2A1,ATP2B2,CACNA1D,CACNA1S,CACNB3,CCL5,CCR5,CDH23,CLU,CNTFR,CP,F2RL1,FGF13,FHL1,GDF2,GPD1L,HAMP,HEPH,HFE2,IGF1,KCNA2,KCNA3,KCNA5,KCNAB1,KCNAB3,KCND3,KCNIP2,KCNJ10,KCNJ3,KCNJ5,KCNJ8,KCNK1,KCNK5,KCNMA1,KCNN4,KCNQ4,MYC,NDRG2,P2RX7,PON1,PRLR,RAMP3,SCN1B,SCN3B,SCN4B,SCN7A,SCN9A,SCNN1B,SCNN1D,SLC17A2,SLC17A4,SLC23A1,SLC39A6,SLC40A1,SLC4A11,SLC4A4,SLC9B2,STOML2…
Cell movement of T lymphocytes	9.18e-09	1.644	ACKR2,ADORA2A,CAMP,CCL14,CCL17,CCL18,CCL19,CCL20,CCL22,CCL27,CCL28,CCL5,CCR4,CCR5,CCR7,CCR8,CD28,CTSG,CXCL11,CXCL12,DEFB1,DEK,ENPP2,FYB1,FYN,HGF,ICOS,IL16,IL21,ITGA3,ITGA6,JAK3,MIF,NR3C1,PIK3CG,RIPOR2,SELP,SMPD1,SMPD2,STAB1,THBS1,TNFRSF6B,TNFSF14,ZAP70
Cell death of immune cells	1.83e-07	1.551	AGER,ANPEP,APOB,AURKB,BCL2,BMP4,C3,C5,CAMK4,CAMP,CASP4,CAV1,CCL19,CCL5,CCR5,CCR7,CCR8,CD19,CD226,CD247,CD27,CD28,CD38,CD40LG,CD48,CD69,CD70,CD8A,CDK1,CLU,CR2,CSF2,CTLA4,CXCL1,CXCL12,DEK,ESR1,ETS2,EZR,FASLG,FCRL3,FLT3,GIMAP5,GPR132,HGF,ICOS,IGF1,IL18,IL21,IL6,IL6R,IL7R,IRF4,ITGAL,ITPR3,JAK3,KLF4,KLRC4-KLRK1/KLRK1,LCN2,LEP,LEPR,LGALS2,LGALS4,LILRB1,LTF,MAP4K1,MS4A1,MX1,MYBL2,MYC,MZB1,NFATC1,NGF,P2R…
Interaction of tumor cell lines	1.89e-10	1.525	ACTN4,ADAM15,ADAM28,ADAM9,ADGRB1,AGT,ALOX15,ANXA2,APOE,APOH,AR,ASGR2,BCL10,C1QBP,CAV1,CCL15,CCND1,CCR5,CD226,CD28,CD55,CD9,CDCP1,CDH2,CDH3,CDHR3,CEACAM5,CFH,CLDN2,CLEC4G,CPB2,CR1,CR2,CTNNA3,CXCL12,CXCR1,CYBB,CYTIP,DDR1,DSG2,E2F1,EFNB1,EPCAM,EPHA2,EPHB6,ESR1,EZR,F10,F2,F3,F9,FBLN5,FGA,FGF2,FUT7,FYB1,FYB2,FYN,GDF15,GJB1,GMFG,GP1BA,HGF,HMMR,HRAS,HS3ST3B1,HYAL1,ICOS,IGF1,IGF2,IL18,IL6,ITGA2,ITGA3,ITG…
Binding of tumor cell lines	1.37e-10	1.524	ACTN4,ADAM15,ADAM28,ADAM9,ADGRB1,AGT,ALOX15,ANXA2,APOE,APOH,AR,ASGR2,BCL10,C1QBP,CAV1,CCL15,CCND1,CCR5,CD226,CD28,CD55,CD9,CDCP1,CDH2,CDH3,CDHR3,CEACAM5,CFH,CLDN2,CLEC4G,CPB2,CR1,CR2,CTNNA3,CXCL12,CXCR1,CYBB,CYTIP,DDR1,DSG2,E2F1,EFNB1,EPCAM,EPHA2,EPHB6,ESR1,F10,F2,F3,F9,FBLN5,FGA,FGF2,FUT7,FYB1,FYB2,FYN,GDF15,GMFG,GP1BA,HGF,HMMR,HRAS,HS3ST3B1,HYAL1,ICOS,IGF1,IGF2,IL18,IL6,ITGA2,ITGA3,ITGA4,ITGA6,…
Binding of blood platelets	3.07e-05	1.469	APOA4,APOH,C3,CCL22,CD24,CXCL12,EFNB1,F10,F12,F2,F5,F9,GP1BA,ITGA2,ITGA2B,KNG1,L1CAM,LRP8,P2RY12,SELP
Secretion of lipid	7.86e-09	1.463	ABCA12,ABCB11,ABCB4,AGK,AGT,ANGPT2,APOA1,APOA4,APOB,APOC3,APOE,ATP8B1,BMP2,BMP4,BMP6,CIDEB,CSF2,CTSG,F2,FFAR4,FST,GHRL,GNRH1,HGF,HSD17B2,IL6,KCNJ5,LEP,LIPC,MTTP,NGF,PLA2G1B,PLAA,POMC,TGFA
Transport of monovalent inorganic cation	1.41e-07	1.455	ABCC9,ACTN2,ASIC2,ATP1A1,ATP1A2,ATP1A4,ATP1B1,ATP6V1B1,CNTFR,FGF13,FHL1,GPD1L,HVCN1,KCNA2,KCNA3,KCNA5,KCNAB1,KCNAB3,KCND3,KCNIP2,KCNJ10,KCNJ3,KCNJ5,KCNJ8,KCNK1,KCNK5,KCNMA1,KCNN4,KCNQ4,NDRG2,NNT,P2RX7,SCN1B,SCN3B,SCN4B,SCN7A,SCN9A,SCNN1B,SCNN1D,SLC17A2,SLC17A4,SLC23A1,SLC4A11,SLC4A4,SLC9B2,WNK3
Lymphohematopoietic neoplasia	7.6e-11	1.422	ABCA10,ABCA12,ABCA9,ABCB11,ABCB4,ABCC11,ABCC9,ABCG2,ABCG5,ABCG8,ACAD11,ACER2,ACTG1,ACTN2,ADAM15,ADAM9,ADAMTS17,ADAMTSL3,ADCY1,ADD2,ADGRB1,ADORA2A,ADRA1A,ADRA1B,AFAP1L2,AGAP5 (includes others),AGTR1,AHNAK2,AIG1,AKAP2,ALDH1A1,ALDH4A1,ALPK3,ALPL,AMPH,ANGPT1,ANGPT2,ANK2,ANKRD20A4 (includes others),ANKRD53,ANKS1B,ANO5,ANPEP,ANXA2,APBA1,APCDD1,APOB,APOBEC3D,APOE,AQP7,ARHGAP9,ARL9,ASAP3,ASMTL-AS1,ASRGL1…
Coagulation of blood	2.36e-09	1.408	ADORA2A,APOE,APOH,ASIC2,C4BPB,CAV1,CD40LG,CLEC1B,CLEC4M,CTSG,CYP2C9,CYP4F11,CYP4F2,EDN1,F10,F11,F12,F2,F2RL1,F2RL2,F3,F7,F9,GGCX,GP1BA,HRG,IL6,ITGA2,KNG1,PF4,PLG,PROC,PROS1,SELP,SERPINE2,SPINT2,STAB2,TFPI,THBS1,THPO,VAV2
Adhesion of extracellular matrix	1.92e-05	1.387	ACER2,ADAM15,ADAM9,AJAP1,ANGPTL3,CD96,COL13A1,ECM2,EPHA2,FBLN5,FGA,FGB,FGG,ITGA10,ITGA2,ITGA3,ITGA4,ITGAL,ITGB4,L1CAM,LYVE1,PARVG,PPFIA2,THBS1,TIAM1,TMEM8B,VCAM1,VTN
Connective or soft tissue tumor	1.13e-07	1.367	A1CF,ABCA10,ABCA12,ABCA8,ACACB,ACAD11,ADAM9,ADAMTSL3,ADAP1,ADH1A,ADH1B,ADI1,ADRA1A,ADRA1B,ADRA2B,AGER,AGRN,AIG1,ALDH1A1,ALDH1B1,ALDOA,ALPL,AMPD1,ANGPT1,ANGPT2,ANKAR,ANPEP,APOA4,APOB,AR,ARHGAP22,ARL4D,ARSE,ASB4,ATP6V1B1,ATRN,ATRNL1,AURKB,AXIN2,BCL10,BCL2,BDH1,BIRC5,BMP4,BRCA1,BSN,BTNL8,C11orf52,C1orf159,C3orf52,C8G,CACNA1H,CACNA1S,CACNA2D3,CADM3,CALB2,CALCR,CAMP,CCND1,CCNE1,CCNE2,CD24,CD3EAP,CD40L…
Connective tissue tumor	2.08e-06	1.367	A1CF,ABCA10,ABCA12,ACACB,ACAD11,ADAM9,ADAMTSL3,ADAP1,ADH1A,ADI1,AGER,AGRN,ALPL,AMPD1,ANGPT1,ANGPT2,ANKAR,ANPEP,APOA4,APOB,AR,ARHGAP22,ASB4,ATP6V1B1,AURKB,AXIN2,BCL2,BIRC5,BMP4,BRCA1,BSN,BTNL8,C11orf52,C1orf159,C3orf52,C8G,CACNA1H,CACNA1S,CACNA2D3,CADM3,CALCR,CAMP,CCND1,CCNE1,CCNE2,CD3EAP,CD40LG,CD84,CDKN1A,CDKN2B,CEBPA,CECR2,CEL,CHAF1B,CHEK1,CHRD,CKS2,CLDN3,CLDN4,CNN1,COL10A1,COL11A2,COL13A1,COL1…
Malignant connective or soft tissue neoplasm	1.33e-05	1.367	A1CF,ABCA10,ABCA12,ACACB,ACAD11,ADAM9,ADAMTSL3,ADAP1,ADH1A,ADI1,AGER,AGRN,ALPL,AMPD1,ANGPT1,ANGPT2,ANKAR,ANPEP,APOA4,APOB,AR,ARHGAP22,ASB4,ATP6V1B1,AURKB,BCL2,BIRC5,BMP4,BRCA1,BSN,BTNL8,C11orf52,C1orf159,C3orf52,C8G,CACNA1H,CACNA1S,CADM3,CALCR,CAMP,CD3EAP,CD40LG,CD84,CDKN1A,CDKN2B,CEBPA,CECR2,CEL,CHAF1B,CHEK1,CHRD,CKS2,CLDN3,CLDN4,CNN1,COL13A1,COL21A1,CPAMD8,CPN2,CSF2,CSF2RA,CTBP2,CTNNA3,CTNND2,C…
Sarcoma	1.64e-05	1.367	A1CF,ABCA10,ABCA12,ACACB,ACAD11,ADAM9,ADAMTSL3,ADAP1,ADH1A,ADI1,AGER,AGRN,AMPD1,ANKAR,ANPEP,APOA4,APOB,AR,ARHGAP22,ASB4,ATP6V1B1,AURKB,BCL2,BIRC5,BMP4,BRCA1,BSN,BTNL8,C11orf52,C1orf159,C3orf52,C8G,CACNA1H,CACNA1S,CADM3,CALCR,CAMP,CD3EAP,CD40LG,CD84,CDKN1A,CDKN2B,CEBPA,CECR2,CEL,CHAF1B,CHEK1,CHRD,CKS2,CLDN3,CLDN4,CNN1,COL13A1,COL21A1,CPAMD8,CPN2,CSF2,CSF2RA,CTBP2,CTNNA3,CTNND2,CXCL12,CYP3A7,CYP7A1…
Transport of steroid	1.47e-05	1.333	ABCA12,ABCA5,ABCB11,ABCB4,ABCC11,ABCG5,ABCG8,AKR1C1/AKR1C2,AKR1C4,APOA1,APOA2,APOA4,APOB,APOC1,APOC2,APOC3,APOE,APOM,CAV1,CCR2,CETP,CLU,CYP3A4,IL6,LCAT,LEP,NPC1L1,PON1,SCD,SLC10A1,SLCO1B1,SOAT2
Cell proliferation of T lymphocytes	3.2e-09	1.332	A2M,AGER,AIF1,APOA1,APOE,ARG1,BATF,BCL2,BMP4,BTLA,BTNL9,C1QBP,CAMP,CAV1,CCL5,CCR5,CD2,CD24,CD247,CD27,CD28,CD38,CD3E,CD40LG,CD6,CD70,CD84,CD8A,CR1,CSF2,CTLA4,CXCL12,DLL4,DSG1,EBI3,EPHB6,FASLG,FOXP3,HLA-DMB,HLA-DPA1,HLA-DPB1,HLA-DRB1,HSPD1,ICOS,IDO1,IGF1,IGF2,IGFBP2,IL12RB1,IL13RA2,IL18,IL21,IL27,IL6,IL6ST,IL7R,ITGA2B,KCNA3,KCNN4,KLRC4-KLRK1/KLRK1,LEP,LILRB1,MYC,PDCD1,PIK3CG,PLCB2,PPAT,SLC7A1,THBS…
Coagulation	2.04e-09	1.281	ADORA2A,APOE,APOH,ASIC2,C4BPB,CAV1,CD40LG,CLEC1B,CLEC4M,CTSG,CYP2C9,CYP4F11,CYP4F2,EDN1,F10,F11,F12,F2,F2RL1,F2RL2,F3,F5,F7,F9,GGCX,GP1BA,HRG,IL6,ITGA2,KNG1,PF4,PLG,PROC,PROS1,SELP,SERPINE2,SPINT2,STAB2,TFPI,THBS1,THPO,VAV2
Concentration of cholesterol	2.05e-05	1.269	ABCB4,ABCG5,ABCG8,ANGPTL3,APOA1,APOA5,APOE,CAV1,CETP,CYP3A4,CYP3A5,DHCR24,GHR,HGF,HMGA1,LIPC,NPC1L1,SLCO1B1,TCF7L2,VNN1
Stimulation of blood cells	1.57e-05	1.242	CAMP,CARD11,CAT,CAV1,CD2,CD24,CD28,CD320,CD40LG,CHRNA1,CSF2,CTSG,EPHA2,F2,ICOS,IL18,IL21,IL6,KLRC4-KLRK1/KLRK1,MUC1,NOS2,PTPRC,TMIGD2,TNFSF9
Migration of cells	2.44e-11	1.234	A2M,ABI3,ACKR1,ACKR2,ACTN4,ADAM15,ADAM9,ADCY10,ADD2,ADI1,ADORA2A,AGAP2,AGER,AGK,AGT,AGTR1,AIF1,ANGPT1,ANGPT2,ANGPTL1,ANGPTL3,ANPEP,ANXA2,ANXA3,APBA1,APOA1,APOE,AR,AREG,ARHGAP11A,ARHGAP8/PRR5-ARHGAP8,ARHGEF16,ARHGEF6,ASCL1,ATRN,AURKA,BAG1,BCL10,BEX4,BMP10,BMP2,BMP4,BMP6,BRCA1,BTC,C1QBP,C3,C5,C5AR2,C5orf30,CA9,CACNA1D,CAMP,CARMIL2,CAT,CAV1,CCL14,CCL15,CCL16,CCL17,CCL18,CCL19,CCL20,CCL22,CCL27,CCL28…
Metabolism of nucleic acid component or derivative	2.9e-06	1.178	ACACB,ACAT1,ACOT1,ACOT2,ADCY10,ADORA2A,AK7,ALDH6A1,ALDOA,APOA1,APOE,ATP1A2,ATP1B1,BAAT,BHMT2,BMP4,BMP6,CALCR,CASR,CCNB1,CDK1,CHRM2,CMPK2,CTPS2,CXCL12,CYP1A1,CYP1A2,CYP2A6 (includes others),CYP2C19,CYP2C9,CYP2D6,CYP2E1,CYP3A4,CYP3A5,DCTPP1,DPYD,DPYS,ENPP1,ENPP3,EPHA2,F2,GLDC,GLYAT,GMDS,GNMT,GPBAR1,GPER1,GPR183,GPR65,GRM8,GUCY1A1,HSPD1,HTR2B,IGF1,IMPDH1,INSL3,KNG1,LRRK2,MRAP2,MTAP,MYH3,MYH7,OAS3,OX…
Shape change of mononuclear leukocytes	6.07e-07	1.131	ATRN,CCL19,CD28,CXCL12,FYB1,ICOS,KCNA3,KCNN4,KNG1,SMPD1,SMPD2,THBS1,VTN
Apoptosis of lymphoid cells	9.4e-06	1.119	AURKB,BCL2,BMP4,CASP4,CAV1,CCL19,CCL5,CCR5,CCR8,CD247,CD27,CD28,CD40LG,CD70,CR2,CTLA4,CXCL12,ETS2,EZR,FASLG,GIMAP5,GPR132,ICOS,IL18,IL21,IL6,IL6R,IL7R,ITPR3,LGALS2,LGALS4,MAP4K1,NFATC1,NGF,PDCD1,PPP2R2B,PRKCQ,SHH,SMPD1,STOML2,TLR7,TNFRSF17,TNFRSF6B,ZBTB16
Apoptosis of lymphatic system cells	3.08e-06	1.111	AURKB,BCL2,BMP4,CASP4,CAV1,CCL19,CCL5,CCR5,CCR8,CD247,CD27,CD28,CD40LG,CD70,CDKN1A,CR2,CTLA4,CXCL12,ETS2,EZR,FASLG,GIMAP5,GPR132,ICOS,IL18,IL21,IL6,IL6R,IL6ST,IL7R,ITPR3,LGALS2,LGALS4,MAP4K1,NFATC1,NGF,PDCD1,PPP2R2B,PRKCQ,SHH,SMPD1,STOML2,THPO,TLR7,TNFRSF17,TNFRSF6B,ZBTB16
Proliferation of mononuclear leukocytes	6.78e-13	1.105	A2M,AGER,AIF1,ANPEP,APOA1,APOE,ARG1,BATF,BCL2,BMP4,BTLA,BTNL9,C1QBP,CAMP,CAV1,CCL5,CCR5,CD19,CD2,CD24,CD244,CD247,CD27,CD28,CD320,CD38,CD3E,CD40LG,CD48,CD6,CD70,CD84,CD8A,CDKN1A,CHRNA1,CR1,CR2,CSF2,CTLA4,CXCL12,DLL4,DSG1,EBI3,EPHB2,EPHB6,FASLG,FCRL3,FLT3,FOXP3,GPR183,GRM5,HLA-DMB,HLA-DPA1,HLA-DPB1,HLA-DRB1,HMGA1,HSPD1,ICOS,IDO1,IGF1,IGF2,IGFBP2,IL10RA,IL12RB1,IL13RA2,IL18,IL21,IL27,IL6,IL6ST,IL7R…
Proliferation of immune cells	3.55e-13	1.085	A2M,AGER,AIF1,ANPEP,APOA1,APOE,ARG1,BATF,BCL2,BMP4,BTLA,BTNL9,C1QBP,CAMP,CAV1,CCL5,CCR5,CD19,CD2,CD24,CD244,CD247,CD27,CD28,CD320,CD38,CD3E,CD40LG,CD48,CD6,CD70,CD84,CD8A,CDKN1A,CHRNA1,CR1,CR2,CSF2,CTLA4,CXCL12,CYSLTR1,CYSLTR2,DLL4,DSG1,EBI3,EPHB2,EPHB6,FASLG,FCRL3,FLT3,FOXP3,GPR183,GRM5,HLA-DMB,HLA-DPA1,HLA-DPB1,HLA-DRB1,HMGA1,HOXB7,HSPD1,ICOS,IDO1,IGF1,IGF2,IGFBP2,IL10RA,IL12RB1,IL13RA2,IL18,IL…
Adhesion of cell-associated matrix	6.39e-06	1.067	ACER2,ADAM15,ADAM9,AJAP1,ANGPTL3,CD96,COL13A1,ECM2,FBLN5,FGA,FGB,FGG,ITGA10,ITGA2,ITGA3,ITGA4,ITGAL,ITGB4,L1CAM,LYVE1,PARVG,PPFIA2,THBS1,TIAM1,TMEM8B,VCAM1,VTN
Formation of muscle cells	1.95e-05	1.067	ACTA1,ACTN2,BMP10,CAPN3,EDN1,IGF2,KDM1A,KRT19,MYOZ1,MYPN,OBSCN,TCAP,TPM1,TTN,VCAM1
Proliferation of lymphatic system cells	5.41e-15	1.067	A2M,AGER,AIF1,APOA1,APOE,ARG1,AURKB,BATF,BCL2,BIRC5,BMP2,BMP4,BTLA,BTNL9,C1QBP,CAMP,CAV1,CCL20,CCL5,CCNB1,CCR5,CD19,CD2,CD24,CD244,CD247,CD27,CD28,CD320,CD38,CD3E,CD40LG,CD48,CD6,CD70,CD84,CD8A,CDC25A,CDKN1A,CHRNA1,CR1,CR2,CSF2,CTLA4,CXCL12,DLL4,DSG1,EBI3,EDN1,EPHB2,EPHB6,F2,FASLG,FCRL3,FGF2,FGFR3,FLT3,FOXM1,FOXP3,GPR183,GRM5,HGF,HLA-DMB,HLA-DPA1,HLA-DPB1,HLA-DRB1,HMGA1,HSPD1,ICOS,IDO1,IGF1,IGF2,…
Proliferation of blood cells	6.37e-13	1.059	A2M,AGER,AIF1,ANPEP,APOA1,APOE,ARG1,BATF,BCL2,BIRC5,BMP2,BMP4,BTLA,BTNL9,C1QBP,CAMP,CAV1,CCL20,CCL5,CCNA2,CCR5,CD19,CD2,CD24,CD244,CD247,CD27,CD28,CD320,CD38,CD3E,CD40LG,CD48,CD6,CD70,CD84,CD8A,CDKN1A,CHRNA1,CR1,CR2,CSF2,CTLA4,CXCL12,CYSLTR1,CYSLTR2,DLL4,DSG1,EBI3,EPAS1,EPHB2,EPHB6,FASLG,FCRL3,FLT3,FOXP3,GPR183,GRM5,HLA-DMB,HLA-DPA1,HLA-DPB1,HLA-DRB1,HMGA1,HOXB7,HRAS,HSPD1,ICOS,IDO1,IGF1,IGF2,IGF…
Cell movement of embryonic cell lines	2.29e-05	1.04	AGT,AGTR1,APOA1,ARHGAP8/PRR5-ARHGAP8,C3,CAMP,CCL16,CCL17,CCL20,CCL5,CCR2,CCR5,CCR8,CCRL2,CDCP1,COL18A1,CXCL1,CXCL12,CYTL1,EFNB1,EPHA2,EPHB3,F10,FASLG,FGA,FOSL1,FUT7,HGF,IGF2,IKZF1,ITGA2,L1CAM,MST1R,NR4A1,PROM1,RIN1,SELE,SH2D3C,TMEFF2,VEGFD,VTN
Cell death of lymphatic system cells	4.18e-07	1.03	AURKB,BCL2,BMP4,CAMP,CASP4,CAV1,CCL19,CCL5,CCR5,CCR8,CD226,CD247,CD27,CD28,CD40LG,CD70,CDK1,CDKN1A,CR2,CSF2,CTLA4,CXCL12,ETS2,EZR,FASLG,GIMAP5,GPR132,ICOS,IL18,IL21,IL6,IL6R,IL6ST,IL7R,ITGAL,ITPR3,LEP,LGALS2,LGALS4,MAP4K1,MS4A1,NFATC1,NGF,PDCD1,PPP2R2B,PRKCB,PRKCQ,SH2D1A,SHH,SLC29A2,SMPD1,STOML2,THPO,TLR7,TNFRSF17,TNFRSF6B,ZBTB16
Activation of T lymphocytes	9.97e-07	1.014	ADORA2A,CCL5,CD2,CD247,CD27,CD28,CD3E,CD40LG,CD7,CEACAM5,CLEC7A,CTLA4,FOXP3,HLA-DPA1,HLA-DPB1,HSPD1,ICOS,ITGA3,ITK,KIR3DL1,KLRC4-KLRK1/KLRK1,KLRD1,LAT,LAX1,LILRB1,MR1,PIK3CD,PIK3CG,PIP5K1B,PLA2G2A,PMEL,PRF1,PTPN22,PTPRC,SIRPG,SIT1,SLA2,TIGIT,TNFRSF6B,TNFSF9,VTCN1,ZAP70
Hematologic cancer	1.97e-10	1	ABCA10,ABCA12,ABCA9,ABCB11,ABCB4,ABCC11,ABCC9,ABCG2,ABCG5,ABCG8,ACAD11,ACER2,ACTG1,ACTN2,ADAM9,ADAMTS17,ADAMTSL3,ADCY1,ADD2,ADGRB1,ADORA2A,ADRA1A,ADRA1B,AFAP1L2,AGAP5 (includes others),AGTR1,AHNAK2,AIG1,AKAP2,ALDH1A1,ALDH4A1,ALPK3,ALPL,AMPH,ANGPT1,ANGPT2,ANK2,ANKRD20A4 (includes others),ANKRD53,ANKS1B,ANO5,ANPEP,ANXA2,APBA1,APCDD1,APOB,APOBEC3D,AQP7,ARHGAP9,ARL9,ASAP3,ASMTL-AS1,ASRGL1,ASXL3,ATG4D…
Organization of muscle cells	1.18e-06	1	ACTN2,BMP10,DSC2,DSG2,EDN1,KRT19,MYPN,OBSCN,TCAP,TPM1,TTN
Apoptosis of lymphocytes	1.81e-05	0.993	AURKB,BCL2,BMP4,CASP4,CAV1,CCL19,CCL5,CCR5,CCR8,CD247,CD27,CD28,CD70,CR2,CTLA4,CXCL12,ETS2,EZR,FASLG,GIMAP5,GPR132,ICOS,IL18,IL21,IL6,IL6R,IL7R,ITPR3,LGALS2,LGALS4,MAP4K1,NFATC1,NGF,PDCD1,PPP2R2B,PRKCQ,SHH,SMPD1,STOML2,TLR7,TNFRSF17,TNFRSF6B,ZBTB16
Proliferation of lymphocytes	4.99e-13	0.991	A2M,AGER,AIF1,APOA1,APOE,ARG1,BATF,BCL2,BMP4,BTLA,BTNL9,C1QBP,CAMP,CAV1,CCL5,CCR5,CD19,CD2,CD24,CD244,CD247,CD27,CD28,CD320,CD38,CD3E,CD40LG,CD48,CD6,CD70,CD84,CD8A,CDKN1A,CHRNA1,CR1,CR2,CSF2,CTLA4,CXCL12,DLL4,DSG1,EBI3,EPHB2,EPHB6,FASLG,FCRL3,FLT3,FOXP3,GPR183,GRM5,HLA-DMB,HLA-DPA1,HLA-DPB1,HLA-DRB1,HMGA1,HSPD1,ICOS,IDO1,IGF1,IGF2,IGFBP2,IL12RB1,IL13RA2,IL18,IL21,IL27,IL6,IL6ST,IL7R,IMPDH2,ISG15…
Cell death of lymphocytes	3.71e-06	0.969	AURKB,BCL2,BMP4,CAMP,CASP4,CAV1,CCL19,CCL5,CCR5,CCR8,CD226,CD247,CD27,CD28,CD40LG,CD70,CDK1,CR2,CSF2,CTLA4,CXCL12,ETS2,EZR,FASLG,GIMAP5,GPR132,ICOS,IL18,IL21,IL6,IL6R,IL7R,ITGAL,ITPR3,LGALS2,LGALS4,MAP4K1,MS4A1,NFATC1,NGF,PDCD1,PPP2R2B,PRKCB,PRKCQ,SH2D1A,SHH,SMPD1,STOML2,TLR7,TNFRSF17,TNFRSF6B,ZBTB16
Homing of T lymphocytes	3.76e-06	0.958	ACKR2,ADORA2A,CAMP,CCL14,CCL17,CCL18,CCL19,CCL20,CCL22,CCL27,CCL28,CCL5,CCR4,CCR5,CCR7,CXCL11,CXCL12,DEFB1,DEK,FYN,IL16,IL21,JAK3,MIF,NR3C1,PIK3CG,THBS1,TNFSF14
Transport of Na+	3.66e-07	0.943	ATP1A4,CNTFR,FGF13,GPD1L,NDRG2,P2RX7,SCN1B,SCN3B,SCN4B,SCN7A,SCN9A,SCNN1B,SCNN1D,SLC17A2,SLC17A4,SLC23A1,SLC4A11,SLC4A4,SLC9B2,WNK3
Stimulation of leukocytes	1.29e-05	0.919	CAMP,CARD11,CAT,CAV1,CD2,CD24,CD28,CD320,CD40LG,CHRNA1,CSF2,CTSG,EPHA2,ICOS,IL18,IL21,IL6,KLRC4-KLRK1/KLRK1,MUC1,NOS2,PTPRC,TMIGD2,TNFSF9
Formation of muscle	2.23e-05	0.896	ACTA1,ACTN2,ADGRB3,ANKRD1,BMP10,BMP4,CACNA1H,CAPN3,CENPF,CSRP3,EDN1,F2,IGF1,IGF2,ITGB1BP2,KDM1A,KRT19,MEF2B,MYH14,MYH3,MYH7,MYL2,MYL3,MYOZ1,MYPN,NKD1,OBSCN,PKP2,SGCD,SPEG,TCAP,TEAD4,TNNT2,TPM1,TTN,VCAM1
Pelvic cancer	1.75e-24	0.849	A1BG,A1CF,A2M,AASS,ABAT,ABCA10,ABCA12,ABCA4,ABCA5,ABCA6,ABCA8,ABCA9,ABCB4,ABCC11,ABCC2,ABCC6,ABCC9,ABCG2,ABCG5,ABO,ACACB,ACAD11,ACADSB,ACOT12,ACOX1,ACR,ACSL1,ACSM1,ACSM2B,ACSS3,ACTG1,ACTG2,ACTN4,ADAM15,ADAM32,ADAM9,ADAMTS10,ADAMTS13,ADAMTSL3,ADAMTSL4,ADCY1,ADCY10,ADCY8,ADD2,ADGRB3,ADH1A,ADH1B,ADI1,ADORA2A,ADRA1A,ADRA1B,ADRA2B,AFAP1L2,AFF3,AFM,AFP,AGAP2,AGAP5 (includes others),AGER,AGK,AGMO,AGT,AG…
Chemotaxis of T lymphocytes	6.39e-06	0.822	ACKR2,ADORA2A,CAMP,CCL14,CCL17,CCL18,CCL19,CCL20,CCL22,CCL27,CCL28,CCL5,CCR4,CCR5,CCR7,CXCL11,CXCL12,DEFB1,DEK,FYN,IL16,IL21,MIF,NR3C1,PIK3CG,THBS1,TNFSF14
Stimulation of lymphatic system cells	1.18e-05	0.73	CARD11,CAV1,CD2,CD24,CD28,CD320,CD40LG,CHRNA1,CSF2,CTSG,EPHA2,ICOS,IL18,IL21,IL6,KLRC4-KLRK1/KLRK1,MUC1,NOS2,PTPRC,TMIGD2,TNFSF9
Stimulation of mononuclear leukocytes	1.18e-05	0.73	CARD11,CAT,CAV1,CD2,CD24,CD28,CD320,CD40LG,CHRNA1,CTSG,EPHA2,ICOS,IL18,IL21,IL6,KLRC4-KLRK1/KLRK1,MUC1,NOS2,PTPRC,TMIGD2,TNFSF9
Blue round small cell tumor	1.52e-05	0.651	ABCA10,ACACB,ACAD11,ADAM9,ADAMTSL3,ADAP1,AGRN,AMPD1,ANKAR,ASB4,ASCL1,ATP6V1B1,BCL2,BIRC5,C11orf52,C1orf159,C3,C3orf67,C5,C8G,CABLES1,CACNA1H,CACNA1S,CALCR,CCND1,CD48,CD84,CDKN1A,CEL,CHAF1B,CKB,CNKSR2,COCH,COL13A1,COL21A1,CPAMD8,CPN2,CSF2RA,CTBP2,CTLA4,CTNNA3,CTNND2,CYP3A4,CYP3A7,CYP7A1,DDX58,DLEC1,DNAH6,DNHD1,DST,EFNA3,ELOVL2,ENO2,ERICH3,FAM157A/FAM157B,FCGR1B,FERMT1,FGD3,FGFR4,GP1BA,GPBAR1,GPER1…
Adhesion of colorectal cancer cell lines	1.09e-05	0.625	CDH3,CTNNA3,DSG2,EFNB1,EPCAM,ICOS,IL18,ITGA2,ITGA3,ITGA9,LGALS2,LGALS4,MAD2L1,NEU4,NME1,PHLDA1,PKM,SDC2,SELE,ST6GAL1,TFF3,TIAM1,TNFRSF25,VEGFD
Cell death of mononuclear leukocytes	4.18e-07	0.605	AURKB,BCL2,BMP4,CAMP,CASP4,CAV1,CCL19,CCL5,CCR5,CCR8,CD226,CD247,CD27,CD28,CD40LG,CD70,CDK1,CR2,CSF2,CTLA4,CXCL12,ETS2,EZR,FASLG,FLT3,GIMAP5,GPR132,ICOS,IL18,IL21,IL6,IL6R,IL7R,ITGAL,ITPR3,KLF4,LGALS2,LGALS4,MAP4K1,MS4A1,NFATC1,NGF,PDCD1,PF4,PPP2R2B,PRKCB,PRKCQ,PTPRC,S100A8,SH2D1A,SHH,SMPD1,STOML2,TLR7,TNFRSF17,TNFRSF6B,ZAP70,ZBTB16
Apoptosis of blood cells	5.84e-06	0.583	ANPEP,AURKB,BCL2,BMP4,CAMP,CASP4,CAV1,CCL19,CCL5,CCR5,CCR8,CD247,CD27,CD28,CD40LG,CD7,CD70,CR2,CSF2,CSF2RA,CTLA4,CXCL1,CXCL12,ETS2,EZR,FASLG,FLT3,GIMAP5,GPR132,ICOS,IGF1,IL18,IL21,IL6,IL6R,IL7R,ITPR3,KLF4,LCN2,LEP,LEPR,LGALS2,LGALS4,LILRB1,LTF,MAP4K1,NFATC1,NGF,P2RX7,PDCD1,PF4,PIK3CD,PPP2R2B,PRKCQ,PTPRC,S100A8,SHH,SIGLEC8,SMPD1,STOML2,THPO,TLR7,TNFRSF17,TNFRSF6B,TNFRSF8,ZBTB16
Metabolism of cholesterol	1.77e-05	0.555	AKR1D1,ANGPTL3,APOA1,APOA4,APOB,APOE,CAV1,CEL,CES1,CETP,CYP11A1,CYP46A1,DHCR24,LCAT,MVK,NPC1L1,NR0B2,SERPINA1,SLCO1B1,SOAT2,ST8SIA1
Apoptosis of leukocytes	6.7e-06	0.548	ANPEP,AURKB,BCL2,BMP4,CAMP,CASP4,CAV1,CCL19,CCL5,CCR5,CCR8,CD247,CD27,CD28,CD40LG,CD70,CR2,CSF2,CTLA4,CXCL1,CXCL12,ETS2,EZR,FASLG,FLT3,GIMAP5,GPR132,ICOS,IGF1,IL18,IL21,IL6,IL6R,IL7R,ITPR3,KLF4,LCN2,LEP,LEPR,LGALS2,LGALS4,LILRB1,LTF,MAP4K1,NFATC1,NGF,P2RX7,PDCD1,PF4,PIK3CD,PPP2R2B,PRKCQ,PTPRC,S100A8,SHH,SIGLEC8,SMPD1,STOML2,TLR7,TNFRSF17,TNFRSF6B,TNFRSF8,ZBTB16
Complement activation	1.92e-06	0.509	AQP4,C2,C3,C6,C7,C8A,C8B,CFH,CFHR1,CFHR5,CLU,CR1,FCN3,MASP1,MASP2,MBL2,MS4A1
Cell cycle progression of breast cancer cell lines	2.22e-05	0.492	BRCA1,CAV1,CCND1,CDKN1A,CHN2,CLU,CYP3A4,ESR1,FOXM1,HPGD,HRAS,IGF1,IL6,KDM8,KRT19,MELK,MIF,MYC,NRG1,PRKN,SCGB3A1,SFN,WT1,ZBTB10
Stimulation of lymphocytes	2.05e-05	0.475	CARD11,CAV1,CD2,CD24,CD28,CD320,CD40LG,CHRNA1,CTSG,EPHA2,ICOS,IL18,IL21,IL6,KLRC4-KLRK1/KLRK1,MUC1,NOS2,PTPRC,TMIGD2,TNFSF9
Breast or pancreatic cancer	2.45e-15	0.454	A1BG,AASS,ABAT,ABCA10,ABCA12,ABCA4,ABCA8,ABCA9,ABCB11,ABCB4,ABCC11,ABCC9,ABCG2,ABHD17C,ABO,ACACB,ACAD11,ACAP1,ACOT1,ACOXL,ACSM5,ACSS3,ACTG1,ACTN2,ADAM15,ADAM28,ADAM33,ADAM9,ADAMTS10,ADAMTS13,ADAMTS17,ADAMTSL3,ADAP1,ADCY1,ADCY10,ADCY8,ADD2,ADGRB3,ADH4,ADORA2A,ADRA1A,ADRA1B,ADRA2B,AFAP1L2,AFF3,AFM,AGAP2,AGBL2,AGER,AGK,AGT,AGXT2,AHNAK2,AIF1,AIG1,AJAP1,AK7,AKAP2,AKAP6,AKNA,AKR1B1,AKR1C1/AKR1C2,ALDH18…
Breast or ovarian cancer	2.28e-12	0.454	A1BG,AASS,ABAT,ABCA10,ABCA12,ABCA4,ABCA8,ABCA9,ABCC11,ABCC9,ABCG2,ABHD17C,ABO,ACACB,ACAD11,ACOT1,ACTG1,ACTN2,ADAM15,ADAM28,ADAM9,ADAMTS10,ADAMTS13,ADAMTSL3,ADCY10,ADCY8,ADD2,ADGRB3,ADORA2A,ADRA1B,AFAP1L2,AFF3,AFM,AGAP2,AGER,AGK,AGT,AHNAK2,AIF1,AIG1,AK7,AKAP2,AKAP6,AKNA,AKR1B1,AKR1C1/AKR1C2,ALDH18A1,ALDH1A1,ALDH1B1,ALDH1L1,ALDH5A1,ALDOA,ALOX15,ALPL,AMPD1,AMPH,ANG,ANGPT1,ANGPT2,ANGPTL6,ANK2,ANKRD1,…
Apoptosis of mononuclear leukocytes	1.57e-06	0.372	AURKB,BCL2,BMP4,CASP4,CAV1,CCL19,CCL5,CCR5,CCR8,CD247,CD27,CD28,CD40LG,CD70,CR2,CTLA4,CXCL12,ETS2,EZR,FASLG,FLT3,GIMAP5,GPR132,ICOS,IL18,IL21,IL6,IL6R,IL7R,ITPR3,KLF4,LGALS2,LGALS4,MAP4K1,NFATC1,NGF,PDCD1,PF4,PPP2R2B,PRKCQ,PTPRC,S100A8,SHH,SMPD1,STOML2,TLR7,TNFRSF17,TNFRSF6B,ZBTB16
Breast cancer	6.63e-08	0.361	ABAT,ABCA10,ABCA4,ABCA8,ABCA9,ABCC11,ABCC9,ABCG2,ABHD17C,ABO,ACACB,ACOT1,ACTN2,ADAM15,ADAM28,ADAM9,ADAMTS10,ADAMTS13,ADCY10,ADCY8,ADGRB3,ADRA1B,AFAP1L2,AGAP2,AGER,AGT,AHNAK2,AIG1,AKAP6,AKR1C1/AKR1C2,ALDH18A1,ALDH1A1,ALDH1B1,ALDH1L1,ALDOA,ALOX15,ALPL,AMPD1,AMPH,ANG,ANGPT1,ANGPT2,ANGPTL6,ANK2,ANKRD1,ANKRD20A4 (includes others),ANKRD24,ANKRD35,ANKRD6,ANKS1B,ANLN,ANPEP,APBB1,APOA1,APOB,APOBEC3B,APOE,…
Migration of embryonic cell lines	2.53e-05	0.328	AGTR1,ARHGAP8/PRR5-ARHGAP8,C3,CCL16,CCL17,CCL20,CCL5,CCR5,CCR8,CCRL2,CDCP1,COL18A1,CXCL12,EFNB1,EPHA2,EPHB3,F10,FASLG,FGA,FOSL1,HGF,IGF2,IKZF1,ITGA2,L1CAM,NR4A1,PROM1,RIN1,SH2D3C,TMEFF2,VEGFD,VTN
Mitosis	4.91e-07	0.297	ACSM5,ADGRL2,AFAP1L2,ANLN,APOE,AR,AREG,AURKA,AURKB,BIRC5,BMP2,BMP4,BMP6,BRCA1,BUB1,BUB1B,CCNB1,CCNB2,CCNE1,CD28,CDC20,CDC25A,CDC25C,CDC6,CDCA8,CDK1,CDKN1A,CDT1,CENPA,CENPE,CENPF,CENPI,CENPW,CHEK1,CHN2,CIT,CSF2,CYP3A4,DLGAP5,EDN1,F2,FGF2,FOXM1,FYN,GRK4,HAUS6,HGF,HNRNPU,HRAS,IGF1,IGF2,IL6,INCENP,ITGB1BP2,KIF11,KIF15,KIF18B,KIF2C,KIF4A,KIFC1,KNG1,LEP,MAD2L1,MAP3K12,MATK,MKI67,MLXIPL,MYBBP1A,NDC80,NE…
Lymphohematopoietic cancer	1.47e-10	0.277	ABCA10,ABCA12,ABCA9,ABCB11,ABCB4,ABCC11,ABCC9,ABCG2,ABCG5,ABCG8,ACAD11,ACER2,ACTG1,ACTN2,ADAM15,ADAM9,ADAMTS17,ADAMTSL3,ADCY1,ADD2,ADGRB1,ADORA2A,ADRA1A,ADRA1B,AFAP1L2,AGAP5 (includes others),AGTR1,AHNAK2,AIG1,AKAP2,ALDH1A1,ALDH4A1,ALPK3,ALPL,AMPH,ANGPT1,ANGPT2,ANK2,ANKRD20A4 (includes others),ANKRD53,ANKS1B,ANO5,ANPEP,ANXA2,APBA1,APCDD1,APOB,APOBEC3D,APOE,AQP7,ARHGAP9,ARL9,ASAP3,ASMTL-AS1,ASRGL1…
Genital tract cancer	4.84e-24	0.246	A1BG,A1CF,A2M,AASS,ABAT,ABCA10,ABCA12,ABCA4,ABCA5,ABCA6,ABCA8,ABCA9,ABCB4,ABCC11,ABCC2,ABCC6,ABCC9,ABCG2,ABCG5,ABO,ACACB,ACAD11,ACADSB,ACOT12,ACOX1,ACSL1,ACSM1,ACSM2B,ACTG1,ACTG2,ACTN4,ADAM15,ADAM32,ADAM9,ADAMTS10,ADAMTS13,ADAMTSL3,ADAMTSL4,ADCY1,ADCY10,ADCY8,ADD2,ADGRB3,ADH1A,ADH1B,ADI1,ADORA2A,ADORA2B,ADRA1A,ADRA1B,ADRA2B,AFAP1L2,AFF3,AFM,AFP,AGAP2,AGAP5 (includes others),AGER,AGK,AGMO,AGT,AGTR…
Coagulation of plasma	2.3e-05	0.189	APOH,F10,F11,F2,F3,F7,PROC,PROS1,SPINT2
Proliferation of B lymphocytes	5.03e-06	0.171	BCL2,CD19,CD244,CD320,CD38,CD40LG,CD70,CDKN1A,CR2,CTLA4,CXCL12,EPHB2,FCRL3,FLT3,GPR183,HSPD1,IL21,IL6,LTA,MIF,MS4A1,MYC,NFATC2,PIK3CD,PIK3CG,PTPRC,SERPINA1,SLAMF7,TNFRSF13B,TNFSF9
Pelvic tumor	4.82e-24	0.14	A1BG,A1CF,A2M,AASS,ABAT,ABCA10,ABCA12,ABCA4,ABCA5,ABCA6,ABCA8,ABCA9,ABCB4,ABCC11,ABCC2,ABCC6,ABCC9,ABCG2,ABCG5,ABO,ACACB,ACAD11,ACADSB,ACOT12,ACOX1,ACR,ACSL1,ACSM1,ACSM2B,ACSS3,ACTG1,ACTG2,ACTN4,ADAM15,ADAM32,ADAM9,ADAMTS10,ADAMTS13,ADAMTSL3,ADAMTSL4,ADCY1,ADCY10,ADCY8,ADD2,ADGRB3,ADH1A,ADH1B,ADI1,ADORA2A,ADRA1A,ADRA1B,ADRA2B,AFAP1L2,AFF3,AFM,AFP,AGAP2,AGAP5 (includes others),AGER,AGK,AGMO,AGT,AG…
Metabolism of sterol	6.75e-06	0.128	AKR1D1,ANGPTL3,APOA1,APOA4,APOB,APOE,CAV1,CEL,CES1,CETP,CYP11A1,CYP24A1,CYP46A1,DHCR24,LCAT,MVK,NPC1L1,NR0B2,SERPINA1,SLCO1B1,SOAT2,ST8SIA1
Proliferation of neuronal cells	2.53e-05	0.112	A2M,APOE,AR,BCL2,BMP4,DLL4,EFNB1,EPHA2,ESR1,FGF2,FGFR3,FKBP4,GDNF,GFRA2,GNRH1,HGF,IGF1,IL6,ITGA3,JAG1,L1CAM,LIF,NCAM1,NGF,NRG1,NTF3,NTN1,SCN1B,TGFA,THBS1,TIAM1,TRPV1
Proliferation of bone marrow cells	9.5e-06	0.109	AURKB,BIRC5,BMP2,BMP4,CCL20,CCNB1,CDC25A,CDKN1A,CSF2,F2,FGF2,FOXM1,IGF1,IL21,IL6,LEP,PF4,SETBP1,THPO
Binding of colorectal cancer cell lines	1.56e-05	0.073	CDH3,CEACAM5,CTNNA3,DSG2,EFNB1,EPCAM,FGF2,HRAS,ICOS,IL18,ITGA2,ITGA3,ITGA9,ITLN1,LGALS2,LGALS4,MAD2L1,NEU4,NME1,PHLDA1,PKM,S100A10,SDC2,SELE,ST6GAL1,TFF3,TIAM1,TNFRSF25,VEGFD
Liver lesion	1.06e-14	0.011	A1BG,A1CF,A2M,AADAC,AASS,ABCA10,ABCA12,ABCA4,ABCA5,ABCA6,ABCA8,ABCA9,ABCB11,ABCB4,ABCC11,ABCC2,ABCC6,ABCC9,ABCD2,ABCG8,ABI3,ACAA1,ACACB,ACAD11,ACADSB,ACAP1,ACAT1,ACBD4,ACMSD,ACOT1,ACOX1,ACOXL,ACR,ACSL1,ACSM2A,ACSM2B,ACSM5,ACSS3,ACTA1,ACTG1,ACTG2,ACTN2,ACTN4,ADAM15,ADAM20,ADAM28,ADAM32,ADAM33,ADAM9,ADAMTS10,ADAMTS13,ADAMTS17,ADAMTSL3,ADAMTSL4,ADAP1,ADCY1,ADCY10,ADCY8,ADD2,ADGRG1,ADH1A,ADH1B,ADH4,A…
Mammary tumor	4.17e-07	0.004	ABAT,ABCA10,ABCA4,ABCA8,ABCA9,ABCC11,ABCC9,ABCG2,ABHD17C,ABO,ACACB,ACOT1,ACTN2,ADAM15,ADAM28,ADAM9,ADAMTS10,ADAMTS13,ADCY10,ADCY8,ADGRB3,ADRA1B,AFAP1L2,AGAP2,AGER,AGT,AHNAK2,AIG1,AKAP6,AKR1C1/AKR1C2,ALDH18A1,ALDH1A1,ALDH1B1,ALDH1L1,ALDOA,ALOX15,ALPL,ALYREF,AMPD1,AMPH,ANG,ANGPT1,ANGPT2,ANGPTL6,ANK2,ANKRD1,ANKRD20A4 (includes others),ANKRD24,ANKRD35,ANKRD6,ANKS1B,ANLN,ANPEP,APBB1,APOA1,APOB,APOBEC3…
Muscle contraction	4.91e-08	0	ACTA1,ADRA1A,ALDOA,ANK2,ATP1A2,BMP10,CACNA1H,CACNA1S,CHRNA1,CNN1,CSRP3,DES,DMD,DTNA,FXYD1,GAMT,GJA5,GNAO1,HRC,JSRP1,KCNH2,KCNMA1,KCNQ1,KLHL41,MYH14,MYH2,MYH3,MYH7,MYL1,MYL2,MYL3,MYOCD,MYOM2,MYOT,P2RX6,PGAM2,PIK3CG,SCN1B,SCN3B,SCN4B,SLC6A8,SLC8A1,TCAP,TNNC2,TNNI2,TNNT1,TNNT2,TNNT3,TPM1,TRDN,TTN
Lymphoproliferative disorder	8.83e-07	0	ABCA10,ABCC9,ABCG2,ACAD11,ACTG1,ADAM9,ADAMTSL3,ADD2,ADGRB1,ADORA2A,ADRA1A,ADRA1B,AFAP1L2,AGTR1,AIG1,ALDH1A1,AMPH,ANGPT2,ANK2,ANKRD20A4 (includes others),ANO5,ANPEP,ANXA2,APBA1,AQP7,ASMTL-AS1,ASXL3,ATP1A2,ATP1B1,ATP2B2,ATRN,ATRNL1,AURKA,AURKB,B3GAT1,BACH2,BCHE,BCL10,BCL11B,BCL2,BCL2L10,BIRC5,BSCL2,BZW2,C19orf57,C1QTNF7,C1R,C3,C3orf52,C7,C9,CACNA1D,CACNA1S,CACNB2,CACNB3,CARD11,CAV1,CCDC113,CCDC86,C…
Catabolism of lipid	6.34e-06	0	ACAT1,AKR1D1,ALDH5A1,ANGPTL3,APOA2,APOA5,APOC3,CD40LG,CEL,CPS1,CYP1A2,CYP24A1,CYP3A4,CYP46A1,ENPP2,HSD17B14,LIPC,LIPH,NEU4,PLA2G4C,PNPLA3,SMPD1,SMPD2,SULT1E1,UGT2B4
Melanoma	4.36e-38	0	A1CF,A2M,AADAC,ABAT,ABCA10,ABCA12,ABCA4,ABCA5,ABCA6,ABCA8,ABCA9,ABCB11,ABCB4,ABCC11,ABCC2,ABCC6,ABCC9,ABCD2,ABCG2,ABCG8,ABI3,ABO,ACAA1,ACACB,ACADL,ACADSB,ACAP1,ACCS,ACMSD,ACOT1,ACOT12,ACOT2,ACOX2,ACOXL,ACR,ACSM1,ACSM2A,ACSM2B,ACSM5,ACSS3,ACTG1,ACTN2,ADAM20,ADAM28,ADAM32,ADAM33,ADAM9,ADAMTS10,ADAMTS13,ADAMTS17,ADAMTSL2,ADAMTSL3,ADAMTSL4,ADAP1,ADCY1,ADCY10,ADCY8,ADD2,ADH1A,ADH1B,ADH4,ADH6,ADHFE1,AD…
Urogenital cancer	9.59e-23	-0.115	A1BG,A1CF,A2M,AASS,ABAT,ABCA10,ABCA12,ABCA4,ABCA5,ABCA6,ABCA8,ABCA9,ABCB4,ABCC11,ABCC2,ABCC6,ABCC9,ABCG2,ABCG5,ABHD11,ABO,ACACB,ACAD11,ACADSB,ACAT1,ACOT1,ACOT12,ACOX1,ACR,ACSL1,ACSM1,ACSM2B,ACSS3,ACTG1,ACTG2,ACTN4,ADAM15,ADAM28,ADAM32,ADAM9,ADAMTS10,ADAMTS13,ADAMTSL3,ADAMTSL4,ADCY1,ADCY10,ADCY8,ADD2,ADGRB3,ADH1A,ADH1B,ADI1,ADORA2A,ADORA2B,ADRA1A,ADRA1B,ADRA2B,AFAP1L2,AFF3,AFM,AFP,AGAP2,AGAP5 (inc…
Malignant neoplasm of male genital organ	5.79e-16	-0.132	A1CF,A2M,ABCA12,ABCA4,ABCB4,ABCC11,ABCC9,ABCG2,ABO,ACACB,ACOX1,ACSM1,ADAM15,ADAM32,ADAM9,ADAMTS13,ADCY1,ADCY10,ADCY8,ADD2,ADORA2B,ADRA1A,ADRA1B,ADRA2B,AFAP1L2,AFM,AFP,AGAP2,AGAP5 (includes others),AGER,AGT,AGTR1,AK7,AKAP2,AKAP6,AKNA,AKR1B1,ALDH18A1,ALDH1L1,ALDH2,ALDH4A1,ALDH5A1,ALDOB,ALOX15,ALPK2,ALPK3,ALPL,AMPD1,AMT,AMY2B,ANGPTL1,ANK2,ANKAR,ANKRD1,ANKRD13B,ANKRD20A4 (includes others),ANKRD35,ANK…
Lymphoid cancer	1.49e-06	-0.152	ABCA10,ABCC9,ABCG2,ACAD11,ACTG1,ADAM15,ADAM9,ADAMTSL3,ADD2,ADGRB1,ADORA2A,ADRA1A,ADRA1B,AFAP1L2,AGTR1,AIG1,ALDH1A1,AMPH,ANGPT2,ANK2,ANKRD20A4 (includes others),ANO5,ANPEP,ANXA2,APBA1,APOE,ASMTL-AS1,ASXL3,ATP1A2,ATP1B1,ATP2B2,ATRN,ATRNL1,AURKA,AURKB,B3GAT1,BACH2,BCHE,BCL10,BCL11B,BCL2,BCL2L10,BIRC5,BSCL2,BZW2,C19orf57,C1QTNF7,C1R,C3,C3orf52,C7,C9,CACNA1D,CACNA1S,CACNB2,CACNB3,CARD11,CAV1,CCDC113,C…
Lymphoid Cancer and Tumors	1.99e-06	-0.152	ABCA10,ABCC9,ABCG2,ACAD11,ACTG1,ADAM15,ADAM9,ADAMTSL3,ADD2,ADGRB1,ADORA2A,ADRA1A,ADRA1B,AFAP1L2,AGTR1,AIG1,ALDH1A1,AMPH,ANGPT2,ANK2,ANKRD20A4 (includes others),ANO5,ANPEP,ANXA2,APBA1,APOE,ASMTL-AS1,ASXL3,ATP1A2,ATP1B1,ATP2B2,ATRN,ATRNL1,AURKA,AURKB,B3GAT1,BACH2,BCHE,BCL10,BCL11B,BCL2,BCL2L10,BIRC5,BSCL2,BZW2,C19orf57,C1QTNF7,C1R,C3,C3orf52,C7,C9,CACNA1D,CACNA1S,CACNB2,CACNB3,CARD11,CAV1,CCDC113,C…
Neoplasia of cells	1.07e-12	-0.16	A1BG,ABCA12,ABCA4,ABCA6,ABCB11,ABCB4,ABCC9,ABI3,ABO,ACAD11,ACADL,ACOT1,ACOT2,ACOX1,ACOXL,ACSM5,ACSS3,ACTN2,ACTN4,ADAM28,ADAM32,ADAM9,ADAMTS10,ADAMTS13,ADAMTS17,ADAMTSL3,ADCY1,ADCY10,ADCY8,ADGRB3,ADH1B,ADORA2A,AFF3,AGAP2,AGAP5 (includes others),AGT,AGTR1,AGXT,AHNAK2,AKAP2,AKAP6,AKNA,ALAD,ALDH1L1,ALDH5A1,ALDOB,ALPK2,AMPD1,AMPH,ANG,ANGPT1,ANGPT2,ANGPTL6,ANKRD20A4 (includes others),ANKRD35,ANKRD53,AN…
Depletion of Ca2+	3.14e-05	-0.186	ATP2A1,BCL2,F2,H6PD,P2RY12,SLC37A4
Cancer	9.83e-25	-0.215	A1BG,A1CF,A2M,AADAC,AADAT,AASS,ABAT,ABCA10,ABCA12,ABCA4,ABCA5,ABCA6,ABCA8,ABCA9,ABCB11,ABCB4,ABCC11,ABCC2,ABCC6,ABCC9,ABCD2,ABCG2,ABCG5,ABCG8,ABHD11,ABHD17C,ABI3,ABO,ACAA1,ACACB,ACAD11,ACADL,ACADSB,ACAP1,ACAT1,ACCS,ACER2,ACMSD,ACOT1,ACOT12,ACOT2,ACOX1,ACOX2,ACOXL,ACR,ACSL1,ACSM1,ACSM2A,ACSM2B,ACSM5,ACSS3,ACTA1,ACTG1,ACTG2,ACTN2,ACTN4,ADAM15,ADAM20,ADAM28,ADAM32,ADAM33,ADAM9,ADAMTS10,ADAMTS13,ADAM…
Prostate Cancer and Tumors	1.36e-15	-0.225	A1CF,A2M,ABCA12,ABCA4,ABCB4,ABCC11,ABCC9,ABCG2,ABO,ACACB,ACOX1,ACSM1,ADAM15,ADAM32,ADAM9,ADAMTS13,ADCY1,ADCY10,ADCY8,ADD2,ADRA1A,ADRA1B,ADRA2B,AFAP1L2,AFM,AFP,AGAP2,AGAP5 (includes others),AGER,AGT,AGTR1,AK7,AKAP2,AKAP6,AKNA,AKR1B1,ALDH18A1,ALDH1L1,ALDH2,ALDH4A1,ALDH5A1,ALDOB,ALOX15,ALPK2,ALPK3,ALPL,AMPD1,AMT,AMY2B,ANGPTL1,ANK2,ANKAR,ANKRD1,ANKRD13B,ANKRD20A4 (includes others),ANKRD35,ANKS1B,ANLN…
Signal transduction	4.41e-09	-0.243	ADAP1,ADCY8,ADGRB1,ADGRB2,ADRA1A,ADRA1B,AGER,AGRN,AGT,AGTR1,AKR1C1/AKR1C2,AMHR2,ANGPT1,ANGPT2,ANGPTL3,APOA1,APOC3,APOE,AR,AREG,ASAH2,ASB2,ASGR2,ASIC3,ASIP,BAG1,BLK,BMX,C3,C5,CAMK4,CAPS,CASR,CCL15,CCL17,CCL18,CCL20,CCL22,CCL5,CCR5,CCR7,CD19,CD2,CD226,CD244,CD28,CD3E,CD3G,CD70,CD79B,CHRNA1,CHRNA4,CLEC1A,CLEC1B,CLEC2D,CLNK,CMKLR1,CRHBP,CTNND2,CXCL1,CXCL11,CXCL12,CXCR1,CYTL1,DAPK1,DEFB1,DEK,DLL4,DTNA…
Inflammation of absolute anatomical region	7.76e-06	-0.269	ABCB11,ABCB4,ABCC2,ACOT1,ADORA2A,ADORA2B,ADRA1A,ADRA1B,ADRA2B,AGER,AGTR1,AMY2B,ANGPTL6,APOA1,APOA2,APOB,APOE,ASB2,ATP1B1,C19orf57,C3,C5,CA12,CA14,CA3,CA5A,CA9,CAMP,CASR,CCL17,CCL18,CCL5,CCR5,CCR7,CD40LG,CD48,CD55,CHRM2,CHRNA1,CHRNA4,CKB,CKM,CKMT1A/CKMT1B,COCH,CRLF2,CSF2RA,CTLA4,CXCL1,CYP11A1,CYP1A1,CYP2C9,CYP2E1,CYP3A4,CYP3A43,CYP3A5,CYP3A7,DDR1,DDX58,DPEP1,EDN1,EPHA2,F10,F2,F3,F5,F8,FCGR1B,FCN2,…
Tumorigenesis of genital organ	1.99e-23	-0.297	A1BG,A1CF,A2M,AASS,ABAT,ABCA10,ABCA12,ABCA4,ABCA5,ABCA6,ABCA8,ABCA9,ABCB4,ABCC11,ABCC2,ABCC6,ABCC9,ABCG2,ABCG5,ABO,ACACB,ACAD11,ACADSB,ACOT12,ACOX1,ACSL1,ACSM1,ACSM2B,ACTG1,ACTG2,ACTN4,ADAM15,ADAM32,ADAM9,ADAMTS10,ADAMTS13,ADAMTSL3,ADAMTSL4,ADCY1,ADCY10,ADCY8,ADD2,ADGRB3,ADH1A,ADH1B,ADI1,ADORA2A,ADORA2B,ADRA1A,ADRA1B,ADRA2B,AFAP1L2,AFF3,AFM,AFP,AGAP2,AGAP5 (includes others),AGER,AGK,AGMO,AGT,AGTR…
Inflammation of body cavity	6.39e-06	-0.3	ABCB11,ABCB4,ABCC2,ACOT1,ADORA2A,ADORA2B,ADRA1A,ADRA1B,ADRA2B,AGER,AGTR1,AMY2B,ANGPTL6,APOA1,APOA2,APOB,APOE,ASB2,ATP1B1,C19orf57,C3,C5,CAMP,CASR,CCL17,CCL18,CCL5,CCR5,CCR7,CD40LG,CD48,CD55,CHRM2,CHRNA1,CHRNA4,CKB,CKM,CKMT1A/CKMT1B,COCH,CRLF2,CSF2RA,CTLA4,CXCL1,CYP11A1,CYP1A1,CYP2C9,CYP2E1,CYP3A4,CYP3A43,CYP3A5,CYP3A7,DDR1,DDX58,DPEP1,EDN1,EPHA2,F10,F2,F3,F5,F8,FCGR1B,FCN2,FGFR3,FLT3,FRMD4B,FRRS1…
Tumorigenesis of malignant tumor	1.06e-21	-0.34	A1CF,A2M,AASS,ABAT,ABCA10,ABCA12,ABCA4,ABCA5,ABCA6,ABCA8,ABCA9,ABCB4,ABCC11,ABCC2,ABCC6,ABCC9,ABCG5,ABHD11,ABI3,ACACB,ACAD11,ACADSB,ACAT1,ACMSD,ACOT1,ACOT12,ACOX1,ACSL1,ACSM1,ACSM2B,ACTA1,ACTG1,ACTN2,ACTN4,ADAM28,ADAM32,ADAM9,ADAMTS10,ADAMTS13,ADAMTSL3,ADAMTSL4,ADAT3,ADCY1,ADCY10,ADCY8,ADD2,ADGRB3,ADH1A,ADH1C,ADHFE1,ADI1,ADORA2A,ADORA2B,ADRA1A,ADRA1B,AFAP1L2,AFF3,AFM,AGAP2,AGAP5 (includes others)…
Glucose metabolism disorder	1.61e-18	-0.343	ABCG5,ACAA1,ACADL,ACOX1,ACOX2,ACSL1,ADCY1,ADORA2B,ADRA1A,ADRA1B,ADRA2B,AGER,AGT,AGTR1,AHSG,AIF1,AKR1B1,ALDH1A1,ALDH2,ALPL,AMBP,AMY2B,ANK2,ANKRD44,APOA1,APOB,APOC1,APOC3,APOE,APOM,AR,ASB2,BACH2,BCL2,BLK,BMP2,BSCL2,C3,C3orf67,C5,CA12,CA14,CA3,CA5A,CA9,CACNA1D,CACNA1S,CACNA2D3,CACNB2,CACNB3,CALCR,CAPN3,CAT,CAV1,CCL16,CCL5,CCND1,CCR2,CCR5,CD24,CD38,CD40LG,CD52,CDKN1A,CDKN2B,CDS1,CEL,CETP,CFB,CHI3L1,C…
Non-melanoma solid tumor	7.1e-24	-0.371	A1BG,A1CF,A2M,AADAC,AADAT,AASS,ABAT,ABCA10,ABCA12,ABCA4,ABCA5,ABCA6,ABCA8,ABCA9,ABCB11,ABCB4,ABCC11,ABCC2,ABCC6,ABCC9,ABCD2,ABCG2,ABCG5,ABCG8,ABHD11,ABHD17C,ABI3,ABO,ACAA1,ACACB,ACAD11,ACADL,ACADSB,ACAP1,ACAT1,ACCS,ACKR1,ACMSD,ACOT1,ACOT12,ACOT2,ACOX1,ACOXL,ACR,ACSL1,ACSM1,ACSM2A,ACSM2B,ACSM5,ACSS3,ACTA1,ACTG1,ACTG2,ACTN2,ACTN4,ADAM15,ADAM20,ADAM28,ADAM32,ADAM33,ADAM9,ADAMTS10,ADAMTS13,ADAMTS17,A…
Malignant solid tumor	2.88e-23	-0.377	A1BG,A1CF,A2M,AADAC,AADAT,AASS,ABAT,ABCA10,ABCA12,ABCA4,ABCA5,ABCA6,ABCA8,ABCA9,ABCB11,ABCB4,ABCC11,ABCC2,ABCC6,ABCC9,ABCD2,ABCG2,ABCG5,ABCG8,ABHD11,ABHD17C,ABI3,ABO,ACAA1,ACACB,ACAD11,ACADL,ACADSB,ACAP1,ACAT1,ACCS,ACMSD,ACOT1,ACOT12,ACOT2,ACOX1,ACOX2,ACOXL,ACR,ACSL1,ACSM1,ACSM2A,ACSM2B,ACSM5,ACSS3,ACTA1,ACTG1,ACTG2,ACTN2,ACTN4,ADAM15,ADAM20,ADAM28,ADAM32,ADAM33,ADAM9,ADAMTS10,ADAMTS13,ADAMTS17,A…
Abdominal neoplasm	3.21e-19	-0.406	A1BG,A1CF,A2M,AADAC,AADAT,AASS,ABAT,ABCA10,ABCA12,ABCA4,ABCA5,ABCA6,ABCA8,ABCA9,ABCB11,ABCB4,ABCC11,ABCC2,ABCC6,ABCC9,ABCD2,ABCG2,ABCG5,ABCG8,ABHD11,ABI3,ABO,ACAA1,ACACB,ACAD11,ACADSB,ACAP1,ACAT1,ACBD4,ACCS,ACMSD,ACOT1,ACOT12,ACOX1,ACOX2,ACOXL,ACR,ACSL1,ACSM1,ACSM2A,ACSM2B,ACSM5,ACSS3,ACTA1,ACTG1,ACTG2,ACTN2,ACTN4,ADAM15,ADAM20,ADAM28,ADAM32,ADAM33,ADAM9,ADAMTS10,ADAMTS13,ADAMTS17,ADAMTSL2,ADAMTS…
Abdominal cancer	3.09e-25	-0.412	A1BG,A1CF,A2M,AADAC,AADAT,AASS,ABAT,ABCA10,ABCA12,ABCA4,ABCA5,ABCA6,ABCA8,ABCA9,ABCB11,ABCB4,ABCC11,ABCC2,ABCC6,ABCC9,ABCD2,ABCG2,ABCG5,ABCG8,ABHD11,ABI3,ABO,ACAA1,ACACB,ACAD11,ACADSB,ACAP1,ACAT1,ACCS,ACMSD,ACOT1,ACOT12,ACOX1,ACOX2,ACOXL,ACR,ACSL1,ACSM1,ACSM2A,ACSM2B,ACSM5,ACSS3,ACTA1,ACTG1,ACTG2,ACTN2,ACTN4,ADAM15,ADAM20,ADAM28,ADAM32,ADAM33,ADAM9,ADAMTS10,ADAMTS13,ADAMTS17,ADAMTSL2,ADAMTSL3,ADA…
Nonhematologic malignant neoplasm	1.42e-22	-0.417	A1BG,A1CF,A2M,AADAC,AADAT,AASS,ABAT,ABCA10,ABCA12,ABCA4,ABCA5,ABCA6,ABCA8,ABCA9,ABCB11,ABCB4,ABCC11,ABCC2,ABCC6,ABCC9,ABCD2,ABCG2,ABCG5,ABCG8,ABHD11,ABHD17C,ABI3,ABO,ACAA1,ACACB,ACAD11,ACADL,ACADSB,ACAP1,ACAT1,ACCS,ACMSD,ACOT1,ACOT12,ACOT2,ACOX1,ACOX2,ACOXL,ACR,ACSL1,ACSM1,ACSM2A,ACSM2B,ACSM5,ACSS3,ACTA1,ACTG1,ACTG2,ACTN2,ACTN4,ADAM15,ADAM20,ADAM28,ADAM32,ADAM33,ADAM9,ADAMTS10,ADAMTS13,ADAMTS17,A…
Segregation of chromosomes	7.1e-07	-0.484	AURKB,BEX4,BRCA1,BUB1,CCNA2,CCNB1,CCNB2,CDC6,CDT1,CENPE,CENPF,CENPW,ECT2,ESPL1,GPSM2,HJURP,INCENP,KIF11,KIF2C,KNSTRN,LMNA,MKI67,MLXIPL,NCAPD2,NCAPG,NCAPH,NDC80,NEK2,NINL,NUF2,PLK1,PTTG1,RCC1,SGO1,SKA1,SKA3,SPAG5,SPC25,SRPK1,TOP2A,ZWINT
Breast or colorectal cancer	3.52e-18	-0.487	AASS,ABAT,ABCA10,ABCA12,ABCA4,ABCA5,ABCA6,ABCA8,ABCA9,ABCC11,ABCC6,ABCC9,ABCG2,ABCG5,ABHD17C,ABI3,ABO,ACACB,ACAT1,ACMSD,ACOT1,ACOT12,ACOX1,ACOX2,ACTA1,ACTG1,ACTN2,ADAM15,ADAM28,ADAM32,ADAM9,ADAMTS10,ADAMTS13,ADAMTSL4,ADCY10,ADCY8,ADD2,ADGRB3,ADORA2A,ADRA1A,ADRA1B,ADTRP,AFAP1L2,AFF3,AFM,AGAP2,AGAP5 (includes others),AGBL2,AGER,AGMO,AGRN,AGT,AHNAK2,AHSA2P,AHSG,AIG1,AJAP1,AKAP2,AKAP6,AKR1B1,AKR1B10,…
Digestive organ tumor	1.55e-15	-0.508	A1BG,A1CF,A2M,AADAC,AADAT,AASS,ABCA10,ABCA12,ABCA4,ABCA5,ABCA6,ABCA8,ABCA9,ABCB11,ABCB4,ABCC11,ABCC2,ABCC6,ABCC9,ABCD2,ABCG2,ABCG5,ABCG8,ABHD11,ABI3,ABO,ACAA1,ACACB,ACAD11,ACADSB,ACAP1,ACAT1,ACBD4,ACCS,ACMSD,ACOT1,ACOT12,ACOX1,ACOX2,ACOXL,ACR,ACSL1,ACSM2A,ACSM2B,ACSM5,ACSS3,ACTA1,ACTG1,ACTG2,ACTN2,ACTN4,ADAM15,ADAM20,ADAM28,ADAM32,ADAM33,ADAM9,ADAMTS10,ADAMTS13,ADAMTS17,ADAMTSL2,ADAMTSL3,ADAMTSL4…
Inflammation of organ	2.75e-07	-0.527	ABCB11,ABCB4,ABCC2,ACOT1,ACTN4,ADCY10,ADORA2A,ADORA2B,ADRA1A,ADRA1B,ADRA2B,AGER,AGT,AGTR1,AKR1D1,AMY2B,ANGPTL6,ANXA2P2,APOA1,APOA2,APOB,APOE,AR,ASB2,ATP1A1,ATP1B1,BCL11B,BCL2,C19orf57,C3,C5,CA12,CA14,CA3,CA5A,CA9,CAMP,CASR,CAT,CCL17,CCL18,CCL20,CCL22,CCL27,CCL5,CCNA2,CCR2,CCR4,CCR5,CCR7,CD2,CD40LG,CD48,CD55,CD7,CDC25A,CFH,CFHR5,CHRM2,CHRNA1,CHRNA4,CKB,CKM,CKMT1A/CKMT1B,CLU,COCH,CPNE7,CPVL,CRLF2,C…
Solid tumor	2.06e-20	-0.532	A1BG,A1CF,A2M,AADAC,AADAT,AASS,ABAT,ABCA10,ABCA12,ABCA4,ABCA5,ABCA6,ABCA8,ABCA9,ABCB11,ABCB4,ABCC11,ABCC2,ABCC6,ABCC9,ABCD2,ABCG2,ABCG5,ABCG8,ABHD11,ABHD17C,ABI3,ABO,ACAA1,ACACB,ACAD11,ACADL,ACADSB,ACAP1,ACAT1,ACBD4,ACCS,ACKR1,ACMSD,ACOT1,ACOT12,ACOT2,ACOX1,ACOX2,ACOXL,ACR,ACSL1,ACSM1,ACSM2A,ACSM2B,ACSM5,ACSS3,ACTA1,ACTG1,ACTG2,ACTN2,ACTN4,ADAM15,ADAM20,ADAM28,ADAM32,ADAM33,ADAM9,ADAMTS10,ADAMTS1…
Male genital neoplasm	4.45e-16	-0.648	A1CF,A2M,ABCA12,ABCA4,ABCB4,ABCC11,ABCC9,ABCG2,ABO,ACACB,ACOX1,ACSM1,ADAM15,ADAM32,ADAM9,ADAMTS13,ADCY1,ADCY10,ADCY8,ADD2,ADORA2B,ADRA1A,ADRA1B,ADRA2B,AFAP1L2,AFM,AFP,AGAP2,AGAP5 (includes others),AGER,AGT,AGTR1,AK7,AKAP2,AKAP6,AKNA,AKR1B1,ALDH18A1,ALDH1L1,ALDH2,ALDH4A1,ALDH5A1,ALDOB,ALOX15,ALPK2,ALPK3,ALPL,ALYREF,AMPD1,AMT,AMY2B,ANGPTL1,ANK2,ANKAR,ANKRD1,ANKRD13B,ANKRD20A4 (includes others),ANKR…
Genital tumor	1.67e-23	-0.663	A1BG,A1CF,A2M,AASS,ABAT,ABCA10,ABCA12,ABCA4,ABCA5,ABCA6,ABCA8,ABCA9,ABCB4,ABCC11,ABCC2,ABCC6,ABCC9,ABCG2,ABCG5,ABO,ACACB,ACAD11,ACADSB,ACOT12,ACOX1,ACSL1,ACSM1,ACSM2B,ACTG1,ACTG2,ACTN4,ADAM15,ADAM32,ADAM9,ADAMTS10,ADAMTS13,ADAMTSL3,ADAMTSL4,ADCY1,ADCY10,ADCY8,ADD2,ADGRB3,ADH1A,ADH1B,ADI1,ADORA2A,ADORA2B,ADRA1A,ADRA1B,ADRA2B,AFAP1L2,AFF3,AFM,AFP,AGAP2,AGAP5 (includes others),AGER,AGK,AGMO,AGT,AGTR…
Chronic inflammatory disorder	6.34e-17	-0.676	A1BG,ABCC2,ACOT1,ACOX2,ACSL1,ACTA1,ACTN4,ADAM15,ADAM9,ADCY8,ADORA2A,ADORA2B,ADRA1A,ADRA1B,ADRA2B,AGER,AGT,AGTR1,AHSG,AIF1,AKR1D1,ALAS2,ALDOA,ALOX15,ALPK2,ALPL,AMPD1,AMT,AMY2B,ANG,APOA1,APOA2,APOE,APOM,AQP9,AREG,ARG1,ATP1B1,BCL2,BHMT,BIRC5,BMP4,BMP5,BSN,BTC,C19orf57,C1orf106,C1QA,C2,C3,C3orf52,C5,C5orf30,C9orf152,CA12,CA14,CA3,CA5A,CA9,CACNA1D,CACNA1H,CACNA1S,CACNB2,CAMP,CASR,CCDC65,CCDC7,CCL14,CC…
Proliferation of epithelial cells	2.05e-05	-0.743	ADORA2A,AREG,ASIP,BMP4,BMP5,BMP6,BRCA1,C5,CASR,CCND1,CCNE1,CDH3,CDKN1A,CDKN2B,CLU,CXCL12,E2F1,EPPK1,FERMT1,FGF2,FHL2,HGF,HPN,HRAS,HYAL1,IGF1,IL26,IL6,KLF9,LAMA3,LMNA,LMNB1,MARVELD3,MCC,MET,MKI67,MMP12,MST1,MST1R,MYC,NME1,PBLD,PDE5A,POMC,PRKCH,PROC,PTN,SFRP2,TERC,TGFA,TMC8,TP63,ZNF304
Bleeding	1.16e-06	-0.76	ADAMTS13,ADORA2A,ADORA2B,ADRA1A,ADRA1B,ADRA2B,ALDH1A1,AMY2B,AR,BCL2,C3,C5,CACNA1D,CACNA1S,CACNB2,CACNB3,CD52,CHRNA1,CHRNA4,CYP2C19,CYP2C9,ESR1,F10,F2,F3,F5,F7,F8,F9,FASLG,FCGR1B,FGA,FGB,FGG,GABRA5,GABRB3,GABRE,GABRG3,GRIN2D,GRIN3A,GUCY1A1,KLKB1,MS4A1,MYL1,NR3C1,OXT,P2RY12,PDE3A,PDE4B,PLA2G2A,PLG,PROS1,PTGER1,RARG,SCN1B,SCN9A,SERPINA1,SERPINC1,TF,TNNT2
Tumor in nervous system	5.06e-11	-0.827	ABAT,ABCA8,ABCG2,ABCG8,ACTN4,ADAMTS13,ADCY8,ADGRB1,ADGRB3,ADRA1A,ADRA1B,ADRA2B,AGAP2,AGAP5 (includes others),AK7,AKAP2,AKR1C1/AKR1C2,ALAD,ALDH1A1,ALDH2,ALDH5A1,ALPK2,ANGPT1,ANGPT2,ANK2,ANKRD20A4 (includes others),ANLN,ANO2,AOAH,AOX1,AQP7,ARHGAP15,ASB2,ASPA,ASPHD1,ASXL3,ATF7IP2,ATP1B1,AXDND1,AXIN2,BAG1,BCL11A,BCL2,BIRC5,BLK,BMF,BRCA1,C19orf57,C3orf52,C6,CA12,CA9,CACNA1D,CACNA1S,CALB2,CAND2,CAPN3,C…
Glioma	2.77e-10	-0.827	ABAT,ABCA8,ABCG2,ABCG8,ACTN4,ADAMTS13,ADCY8,ADGRB1,ADGRB3,AGAP2,AGAP5 (includes others),AK7,AKAP2,AKR1C1/AKR1C2,ALAD,ALDH1A1,ALDH2,ALDH5A1,ALPK2,ANGPT2,ANK2,ANKRD20A4 (includes others),ANLN,ANO2,AOAH,AOX1,AQP7,ARHGAP15,ASB2,ASPA,ASPHD1,ASXL3,ATF7IP2,ATP1B1,AXDND1,AXIN2,BAG1,BCL11A,BCL2,BIRC5,BMF,BRCA1,C19orf57,C3orf52,C6,CA12,CA9,CACNA1S,CAND2,CAPN3,CAT,CAV1,CBWD3/CBWD6,CCND1,CCR2,CCR5,CD200,CD20…
Tumorigenesis of neuroepithelial tumor	3.07e-10	-0.827	ABAT,ABCA8,ABCG2,ABCG8,ACTN4,ADAMTS13,ADCY8,ADGRB1,ADGRB3,AGAP2,AGAP5 (includes others),AK7,AKAP2,AKR1C1/AKR1C2,ALAD,ALDH1A1,ALDH2,ALDH5A1,ALPK2,ANGPT2,ANK2,ANKRD20A4 (includes others),ANLN,ANO2,AOAH,AOX1,AQP7,ARHGAP15,ASB2,ASPA,ASPHD1,ASXL3,ATF7IP2,ATP1B1,AXDND1,AXIN2,BAG1,BCL11A,BCL2,BIRC5,BMF,BRCA1,C19orf57,C3orf52,C6,CA12,CA9,CACNA1S,CAND2,CAPN3,CAT,CAV1,CBWD3/CBWD6,CCND1,CCR2,CCR5,CD200,CD20…
Central nervous system tumor	3.41e-10	-0.827	ABAT,ABCA8,ABCG2,ABCG8,ACTN4,ADAMTS13,ADCY8,ADGRB1,ADGRB3,ADRA2B,AGAP2,AGAP5 (includes others),AK7,AKAP2,AKR1C1/AKR1C2,ALAD,ALDH1A1,ALDH2,ALDH5A1,ALPK2,ANGPT1,ANGPT2,ANK2,ANKRD20A4 (includes others),ANLN,ANO2,AOAH,AOX1,AQP7,ARHGAP15,ASB2,ASPA,ASPHD1,ASXL3,ATF7IP2,ATP1B1,AXDND1,AXIN2,BAG1,BCL11A,BCL2,BIRC5,BLK,BMF,BRCA1,C19orf57,C3orf52,C6,CA12,CA9,CACNA1D,CACNA1S,CALB2,CAND2,CAPN3,CAT,CAV1,CBWD3/…
Central nervous system solid tumor	3.68e-10	-0.827	ABAT,ABCA8,ABCG2,ABCG8,ACTN4,ADAMTS13,ADCY8,ADGRB1,ADGRB3,ADRA2B,AGAP2,AGAP5 (includes others),AK7,AKAP2,AKR1C1/AKR1C2,ALAD,ALDH1A1,ALDH2,ALDH5A1,ALPK2,ANGPT1,ANGPT2,ANK2,ANKRD20A4 (includes others),ANLN,ANO2,AOAH,AOX1,AQP7,ARHGAP15,ASB2,ASPA,ASPHD1,ASXL3,ATF7IP2,ATP1B1,AXDND1,AXIN2,BAG1,BCL11A,BCL2,BIRC5,BLK,BMF,BRCA1,C19orf57,C3orf52,C6,CA12,CA9,CACNA1D,CACNA1S,CALB2,CAND2,CAPN3,CAT,CAV1,CBWD3/…
Thoracic cancer	1.23e-11	-0.849	ABCA12,ABCC2,ACOT1,ACOT2,ACOX1,ACTN2,ADAM15,ADAM28,ADAM9,ADCY10,ADGRB3,ADH1C,ADORA2A,ADORA2B,ADRA1B,AFM,AGK,AGRN,AHNAK2,AIMP2,AKR1B10,ALDH1B1,ALDH1L1,ALDOA,ALPK2,ANGPT1,ANK2,ANKS1B,ANO2,ANXA2,ANXA3,APOB,APOBEC3B,APOC1,AR,AREG,ARHGEF6,ARID3C,ASXL3,ATP1A1,ATP1A2,ATP1B1,ATP2B2,ATP8B2,ATRNL1,AURKA,AURKB,AXIN2,B3GAT1,BACE2,BCHE,BCL10,BCL11A,BCL2,BIRC5,BLK,BMP2,BMX,BRCA1,BSN,BUB1B,C11orf52,C1orf159,C2o…
Lung cancer	2.25e-11	-0.849	ABCA12,ABCC2,ACOT1,ACOT2,ACOX1,ACTN2,ADAM15,ADAM28,ADAM9,ADCY10,ADGRB3,ADH1C,ADORA2A,ADORA2B,ADRA1B,AFM,AGK,AGRN,AHNAK2,AIMP2,AKR1B10,ALDH1B1,ALDH1L1,ALDOA,ALPK2,ANGPT1,ANK2,ANKS1B,ANO2,ANXA2,ANXA3,APOB,APOBEC3B,APOC1,AR,AREG,ARHGEF6,ARID3C,ASXL3,ATP1A1,ATP1A2,ATP1B1,ATP2B2,ATP8B2,ATRNL1,AURKA,AURKB,AXIN2,B3GAT1,BACE2,BCHE,BCL10,BCL11A,BCL2,BIRC5,BLK,BMP2,BMX,BRCA1,BSN,BUB1B,C11orf52,C1orf159,C2o…
Lung carcinoma	4.51e-10	-0.849	ABCA12,ABCC2,ACOT1,ACOT2,ACOX1,ACTN2,ADAM9,ADCY10,ADGRB3,ADH1C,ADORA2A,ADORA2B,ADRA1B,AFM,AGK,AGRN,AHNAK2,AKR1B10,ALDH1B1,ALDH1L1,ALDOA,ALPK2,ANGPT1,ANK2,ANKS1B,ANO2,ANXA2,ANXA3,APOB,APOBEC3B,APOC1,AR,AREG,ARHGEF6,ARID3C,ASXL3,ATP1A1,ATP1A2,ATP1B1,ATP2B2,ATP8B2,ATRNL1,AURKA,AURKB,AXIN2,B3GAT1,BACE2,BCHE,BCL11A,BCL2,BIRC5,BLK,BMX,BRCA1,BSN,C11orf52,C1orf159,C2orf16,C3orf52,C3orf67,C7,C8B,C9,CA9,CA…
Digestive system cancer	3.66e-20	-0.853	A1BG,A1CF,A2M,AADAC,AADAT,AASS,ABCA10,ABCA12,ABCA4,ABCA5,ABCA6,ABCA8,ABCA9,ABCB11,ABCB4,ABCC11,ABCC2,ABCC6,ABCC9,ABCD2,ABCG2,ABCG5,ABCG8,ABHD11,ABI3,ABO,ACAA1,ACACB,ACADSB,ACAP1,ACAT1,ACCS,ACMSD,ACOT1,ACOT12,ACOX1,ACOX2,ACOXL,ACSL1,ACSM2A,ACSM5,ACSS3,ACTA1,ACTG1,ACTG2,ACTN2,ADAM15,ADAM20,ADAM28,ADAM32,ADAM33,ADAM9,ADAMTS10,ADAMTS13,ADAMTS17,ADAMTSL2,ADAMTSL3,ADAMTSL4,ADAP1,ADAT3,ADCY1,ADCY10,ADCY…
Cell movement of tumor cell lines	6.72e-08	-0.923	A2M,ACTN4,ADAM15,ADAM9,AGAP2,AGER,AGK,AGT,AIF1,AJAP1,ANGPT2,ANPEP,ANXA2,AR,AREG,ARHGAP11A,ARHGAP8/PRR5-ARHGAP8,ARHGEF16,ARHGEF6,ASCL1,AURKA,BAG1,BCL10,BMP2,BMP6,BRCA1,C1QBP,C3,C5,CA9,CACNA1D,CAMP,CAT,CAV1,CCL14,CCL15,CCL16,CCL17,CCL18,CCL19,CCL20,CCL22,CCL5,CCND1,CCR2,CCR4,CCR5,CCR7,CCR8,CD24,CD28,CD9,CDCP1,CDH2,CDH3,CDK14,CDKN1A,CDKN3,CHN2,CLCN4,CLDN3,CLDN4,CLDN7,CLEC1B,CLU,COL18A1,CREB3,CREB3L1…
Interaction of protein	3.95e-09	-0.926	AASS,ACACB,ACTN2,ALDH5A1,ANXA2,BAG1,BCL2,BEST1,CAT,CAV1,CCL5,CD247,CD28,CD38,CD79A,CD8A,CRYZ,CSF2,CTH,CYP3A4,DCXR,EGR1,ESR1,FBP1,FGA,FGB,FGF2,GNMT,GPX3,HIST1H3A,HIST1H3B,HIST1H3C,HIST1H3D,HIST1H3H,HIST1H3I,HIST1H3J,HIST1H4F,HIST1H4L,HIST2H4A,HIST2H4B,HMGA1,HMGCL,IGF1,IGF2,IL6,LYST,MAT1A,MST1,NRG1,RCC1,S100A10,SELP,SHMT1,TDO2,TF,TGFA,TK1,TP63,TRPA1
Metabolism of amino acids	1.79e-07	-1	AADAT,ACAT1,AGXT,AGXT2,ALDH18A1,ALDH5A1,ALDH6A1,AMT,ARG1,ASPA,BAAT,BCAT2,CBS/CBSL,CDO1,CPS1,CTH,DAO,DPEP1,GAMT,GATM,GLDC,GLYAT,GLYATL1,HDC,HMGCL,IDO1,MAT1A,MTHFS,MUT,MYC,NAGS,NOS2,PAH,PKM,PYCR1,SDS,SHMT1,SLC3A1,SLC7A2,SLC7A5,TAT,UROC1
Heart rate	2.59e-05	-1.103	ALDH2,ANK2,ATP1A2,BMP10,CACNA1H,CELF2,CSRP3,CYP2D6,DES,DMD,FXYD1,GJA5,HRC,KCNH2,KCNIP2,KCNQ1,MYH7,MYL3,PIK3CG,SCN1B,SCN3B,SCN4B,SLC8A1,TCAP,TNNT2,TPM1,TRDN,TTN
Colorectal neoplasia	1.55e-17	-1.134	AASS,ABCA10,ABCA12,ABCA4,ABCA5,ABCA6,ABCA8,ABCA9,ABCC11,ABCC6,ABCG2,ABCG5,ABI3,ACACB,ACAT1,ACMSD,ACOT12,ACOX1,ACOX2,ACTA1,ACTG1,ACTN2,ADAM28,ADAM32,ADAMTS10,ADAMTS13,ADAMTSL4,ADCY10,ADCY8,ADD2,ADORA2A,ADRA1A,ADRA1B,ADTRP,AFAP1L2,AFF3,AFM,AGAP5 (includes others),AGBL2,AGMO,AGRN,AHNAK2,AHSA2P,AHSG,AJAP1,AKAP2,AKAP6,AKR1B1,AKR1B10,AKR1C1/AKR1C2,ALAS2,ALDH1A1,ALDH1B1,ALDH1L1,ALDH2,ALDH6A1,ALDH8A1,ALD…
Gastrointestinal neoplasia	8.79e-16	-1.134	A1BG,A2M,AADAT,AASS,ABCA10,ABCA12,ABCA4,ABCA5,ABCA6,ABCA8,ABCA9,ABCB11,ABCB4,ABCC11,ABCC2,ABCC6,ABCC9,ABCD2,ABCG2,ABCG5,ABHD11,ABI3,ACAA1,ACACB,ACAD11,ACADSB,ACAP1,ACAT1,ACCS,ACMSD,ACOT12,ACOX1,ACOX2,ACSM2A,ACSS3,ACTA1,ACTG1,ACTG2,ACTN2,ADAM15,ADAM20,ADAM28,ADAM32,ADAM33,ADAM9,ADAMTS10,ADAMTS13,ADAMTS17,ADAMTSL2,ADAMTSL3,ADAMTSL4,ADAP1,ADAT3,ADCY1,ADCY10,ADCY8,ADD2,ADH6,ADHFE1,ADORA2A,ADORA2B,ADR…
Colorectal cancer	4.66e-15	-1.134	AASS,ABCA10,ABCA12,ABCA4,ABCA5,ABCA6,ABCA8,ABCA9,ABCC11,ABCC6,ABCG5,ABI3,ACACB,ACAT1,ACMSD,ACOT12,ACOX1,ACOX2,ACTA1,ACTG1,ACTN2,ADAM28,ADAM32,ADAMTS10,ADAMTS13,ADAMTSL4,ADCY10,ADCY8,ADD2,ADORA2A,ADRA1A,ADRA1B,ADTRP,AFAP1L2,AFF3,AFM,AGAP5 (includes others),AGBL2,AGMO,AGRN,AHNAK2,AHSA2P,AHSG,AJAP1,AKAP2,AKAP6,AKR1B1,AKR1B10,AKR1C1/AKR1C2,ALAS2,ALDH1A1,ALDH1B1,ALDH1L1,ALDH2,ALDH6A1,ALDH8A1,ALDOA,ALO…
Gastrointestinal tract cancer	4.99e-15	-1.134	A1BG,A2M,AADAT,AASS,ABCA10,ABCA12,ABCA4,ABCA5,ABCA6,ABCA8,ABCA9,ABCB11,ABCB4,ABCC11,ABCC2,ABCC6,ABCC9,ABCD2,ABCG5,ABHD11,ABI3,ACAA1,ACACB,ACADSB,ACAP1,ACAT1,ACCS,ACMSD,ACOT12,ACOX1,ACOX2,ACSM2A,ACSS3,ACTA1,ACTG1,ACTG2,ACTN2,ADAM15,ADAM20,ADAM28,ADAM32,ADAM33,ADAM9,ADAMTS10,ADAMTS13,ADAMTS17,ADAMTSL2,ADAMTSL3,ADAMTSL4,ADAP1,ADAT3,ADCY1,ADCY10,ADCY8,ADD2,ADH6,ADHFE1,ADORA2A,ADORA2B,ADRA1A,ADRA1B,AD…
Large intestine neoplasm	5.26e-14	-1.134	A1BG,A2M,AADAT,AASS,ABCA10,ABCA12,ABCA4,ABCA5,ABCA6,ABCA8,ABCA9,ABCB11,ABCB4,ABCC11,ABCC2,ABCC6,ABCC9,ABCD2,ABCG2,ABCG5,ABHD11,ABI3,ACAA1,ACACB,ACADSB,ACAP1,ACAT1,ACCS,ACMSD,ACOT12,ACOX1,ACOX2,ACSM2A,ACTA1,ACTG1,ACTG2,ACTN2,ADAM20,ADAM28,ADAM32,ADAM33,ADAM9,ADAMTS10,ADAMTS13,ADAMTS17,ADAMTSL2,ADAMTSL3,ADAMTSL4,ADAP1,ADCY1,ADCY10,ADCY8,ADD2,ADH6,ADHFE1,ADORA2A,ADORA2B,ADRA1A,ADRA1B,ADTRP,AFAP1L2,A…
Intestinal tumor	5.31e-14	-1.134	A1BG,A2M,AADAT,AASS,ABCA10,ABCA12,ABCA4,ABCA5,ABCA6,ABCA8,ABCA9,ABCB11,ABCB4,ABCC11,ABCC2,ABCC6,ABCC9,ABCD2,ABCG2,ABCG5,ABHD11,ABI3,ACAA1,ACACB,ACADSB,ACAP1,ACAT1,ACCS,ACMSD,ACOT12,ACOX1,ACOX2,ACSM2A,ACTA1,ACTG1,ACTG2,ACTN2,ADAM20,ADAM28,ADAM32,ADAM33,ADAM9,ADAMTS10,ADAMTS13,ADAMTS17,ADAMTSL2,ADAMTSL3,ADAMTSL4,ADAP1,ADCY1,ADCY10,ADCY8,ADD2,ADH6,ADHFE1,ADORA2A,ADORA2B,ADRA1A,ADRA1B,ADTRP,AFAP1L2,A…
Intestinal cancer	4.43e-13	-1.134	A1BG,A2M,AADAT,AASS,ABCA10,ABCA12,ABCA4,ABCA5,ABCA6,ABCA8,ABCA9,ABCB11,ABCB4,ABCC11,ABCC2,ABCC6,ABCC9,ABCD2,ABCG5,ABHD11,ABI3,ACAA1,ACACB,ACADSB,ACAP1,ACAT1,ACCS,ACMSD,ACOT12,ACOX1,ACOX2,ACSM2A,ACTA1,ACTG1,ACTG2,ACTN2,ADAM20,ADAM28,ADAM32,ADAM33,ADAM9,ADAMTS10,ADAMTS13,ADAMTS17,ADAMTSL2,ADAMTSL3,ADAMTSL4,ADAP1,ADCY1,ADCY10,ADCY8,ADD2,ADH6,ADHFE1,ADORA2A,ADORA2B,ADRA1A,ADRA1B,ADTRP,AFAP1L2,AFF3,AF…
Malignant neoplasm of large intestine	5.06e-13	-1.134	A1BG,A2M,AADAT,AASS,ABCA10,ABCA12,ABCA4,ABCA5,ABCA6,ABCA8,ABCA9,ABCB11,ABCB4,ABCC11,ABCC2,ABCC6,ABCC9,ABCD2,ABCG5,ABHD11,ABI3,ACAA1,ACACB,ACADSB,ACAP1,ACAT1,ACCS,ACMSD,ACOT12,ACOX1,ACOX2,ACSM2A,ACTA1,ACTG1,ACTG2,ACTN2,ADAM20,ADAM28,ADAM32,ADAM33,ADAM9,ADAMTS10,ADAMTS13,ADAMTS17,ADAMTSL2,ADAMTSL3,ADAMTSL4,ADAP1,ADCY1,ADCY10,ADCY8,ADD2,ADH6,ADHFE1,ADORA2A,ADORA2B,ADRA1A,ADRA1B,ADTRP,AFAP1L2,AFF3,AF…
Advanced stage tumor	1.45e-05	-1.141	ABAT,ABCA8,ADAM15,ADRA1A,ADRA1B,AFP,AKR1C1/AKR1C2,ALDH5A1,ALPL,AMY2B,ANGPT2,ANPEP,ANXA8/ANXA8L1,APOE,AR,ARG1,ATP8B1,AURKB,AXIN2,BCL10,BCL2,BEX4,BLK,BMP6,BRCA1,C1R,C2orf88,C3,C5,CA9,CALB2,CAV1,CCL19,CCND1,CCR2,CCR7,CD24,CD48,CD52,CD9,CDC25A,CDH2,CDKN3,CEACAM5,CEMIP,CFH,CFHR1,CHRM2,CHRNA4,CLDN2,CLDN3,CLDN4,CLU,CMTM4,COL18A1,CRYZ,CSF2RA,CSRP3,CST7,CTLA4,CXCL12,CYP3A4,CYP3A5,CYP3A7,DDR1,DDX58,DHTKD1,…
Advanced malignant tumor	1.56e-05	-1.141	ABAT,ABCA8,ADAM15,ADRA1A,ADRA1B,AFP,AKR1C1/AKR1C2,ALDH5A1,ALPL,AMY2B,ANGPT2,ANPEP,ANXA8/ANXA8L1,APOE,AR,ARG1,ATP8B1,AURKB,AXIN2,BCL10,BCL2,BEX4,BLK,BRCA1,C1R,C2orf88,C3,C5,CA9,CALB2,CAV1,CCL19,CCND1,CCR2,CCR7,CD24,CD48,CD52,CD9,CDC25A,CDH2,CDKN3,CEACAM5,CEMIP,CFH,CFHR1,CHRM2,CHRNA4,CLDN2,CLDN3,CLDN4,CLU,CMTM4,COL18A1,CRYZ,CSF2RA,CSRP3,CST7,CTLA4,CXCL12,CYP3A4,CYP3A5,CYP3A7,DDR1,DDX58,DHTKD1,DIRAS…
Genitourinary tumor	2.45e-22	-1.154	A1BG,A1CF,A2M,AASS,ABAT,ABCA10,ABCA12,ABCA4,ABCA5,ABCA6,ABCA8,ABCA9,ABCB4,ABCC11,ABCC2,ABCC6,ABCC9,ABCG2,ABCG5,ABHD11,ABO,ACACB,ACAD11,ACADSB,ACAT1,ACOT1,ACOT12,ACOX1,ACR,ACSL1,ACSM1,ACSM2B,ACSS3,ACTG1,ACTG2,ACTN4,ADAM15,ADAM28,ADAM32,ADAM9,ADAMTS10,ADAMTS13,ADAMTSL3,ADAMTSL4,ADCY1,ADCY10,ADCY8,ADD2,ADGRB3,ADH1A,ADH1B,ADI1,ADORA2A,ADORA2B,ADRA1A,ADRA1B,ADRA2B,AFAP1L2,AFF3,AFM,AFP,AGAP2,AGAP5 (inc…
Respiratory system tumor	2.03e-12	-1.172	A1BG,ABCA12,ABCB4,ABCC2,ABCC9,ACOT1,ACOT2,ACOX1,ACTN2,ACTN4,ADAM15,ADAM28,ADAM9,ADAMTS13,ADAMTSL3,ADCY1,ADCY10,ADGRB3,ADH1C,ADORA2A,ADORA2B,ADRA1B,AFM,AGER,AGK,AGRN,AGT,AHNAK2,AIMP2,AKAP6,AKR1B1,AKR1B10,ALDH1B1,ALDH1L1,ALDOA,ALDOB,ALOX15,ALPK2,ALYREF,AMPH,ANGPT1,ANK2,ANKRD53,ANKS1B,ANO2,ANO5,ANXA2,ANXA3,APOB,APOBEC3B,APOC1,AQP7,AR,AREG,ARFGEF3,ARHGAP15,ARHGAP28,ARHGAP6,ARHGEF6,ARID3C,ASB12,ASCL1,…
Thoracic neoplasm	4.24e-12	-1.172	ABCA12,ABCC2,ACOT1,ACOT2,ACOX1,ACTN2,ACTN4,ADAM15,ADAM28,ADAM9,ADCY10,ADGRB3,ADH1C,ADORA2A,ADORA2B,ADRA1B,AFM,AGER,AGK,AGRN,AHNAK2,AIMP2,AKR1B1,AKR1B10,ALDH1B1,ALDH1L1,ALDOA,ALOX15,ALPK2,ALYREF,ANGPT1,ANK2,ANKS1B,ANO2,ANXA2,ANXA3,APOB,APOBEC3B,APOC1,AR,AREG,ARHGEF6,ARID3C,ASXL3,ATP1A1,ATP1A2,ATP1B1,ATP2B2,ATP8B2,ATRNL1,AURKA,AURKB,AXIN2,B3GAT1,BACE2,BCHE,BCL10,BCL11A,BCL2,BIRC5,BLK,BMP2,BMX,BRCA1…
Lung tumor	6.72e-12	-1.172	ABCA12,ABCC2,ACOT1,ACOT2,ACOX1,ACTN2,ACTN4,ADAM15,ADAM28,ADAM9,ADCY10,ADGRB3,ADH1C,ADORA2A,ADORA2B,ADRA1B,AFM,AGER,AGK,AGRN,AHNAK2,AIMP2,AKR1B1,AKR1B10,ALDH1B1,ALDH1L1,ALDOA,ALOX15,ALPK2,ALYREF,ANGPT1,ANK2,ANKS1B,ANO2,ANXA2,ANXA3,APOB,APOBEC3B,APOC1,AR,AREG,ARHGEF6,ARID3C,ASXL3,ATP1A1,ATP1A2,ATP1B1,ATP2B2,ATP8B2,ATRNL1,AURKA,AURKB,AXIN2,B3GAT1,BACE2,BCHE,BCL10,BCL11A,BCL2,BIRC5,BLK,BMP2,BMX,BRCA1…
Growth of epithelial tissue	8.13e-06	-1.23	ADAM15,ADORA2A,AGER,ANG,ANGPT1,ANGPT2,ANGPTL1,APOE,APOH,AREG,ASIP,BMP2,BMP4,BMP5,BMP6,BRCA1,C3,C5,CAMP,CASR,CCND1,CCNE1,CDH2,CDH3,CDKN1A,CDKN2B,CLU,COL18A1,CXCL1,CXCL12,CYBB,DKK1,DLL4,E2F1,EDN1,EPPK1,F12,F2,F2RL1,F3,FABP4,FERMT1,FGF2,FGFR3,FHL2,GDF2,GHRL,HGF,HMGB2,HPN,HRAS,HTR2B,HYAL1,IGF1,IL26,IL6,KLF9,KNG1,LAMA3,LCN2,LEP,LMNA,LMNB1,LOXL2,MARVELD3,MCC,MET,MKI67,MMP12,MST1,MST1R,MYC,NME1,NR4A1,PB…
Rheumatic Disease	7.01e-13	-1.29	A1BG,ABCC2,ABCG2,ACOX2,ACSL1,ACTA1,ADAM15,ADAM9,ADAMTS10,ADAMTS13,ADAMTS17,ADCY8,ADORA2A,ADRA1A,ADRA1B,ADRA2B,AGER,AHSG,AIF1,AKR1D1,ALAS2,ALDOA,ALOX15,ALPK2,ALPL,AMPD1,ANG,APOA1,APOE,APOH,APOM,AQP9,AR,AREG,ARG1,ATP1B1,BHMT,BIRC5,BLK,BMP2,BMP4,BMP5,BTC,C19orf57,C1QA,C1QB,C1R,C1S,C2,C3,C3orf67,C5,C5orf30,C9orf152,CACNA1D,CACNA1H,CACNA1S,CACNA2D3,CACNB2,CAMP,CCDC7,CCL14,CCL15,CCL16,CCL17,CCL18,CCL19…
Cancer of cells	2.54e-12	-1.353	A1BG,ABCA12,ABCA4,ABCA6,ABCB11,ABCB4,ABCC9,ABI3,ABO,ACAD11,ACADL,ACOT1,ACOT2,ACOX1,ACOXL,ACSM5,ACSS3,ACTN2,ACTN4,ADAM28,ADAM32,ADAM9,ADAMTS10,ADAMTS13,ADAMTS17,ADAMTSL3,ADCY1,ADCY10,ADCY8,ADGRB3,ADH1B,ADORA2A,AFF3,AGAP2,AGAP5 (includes others),AGT,AGTR1,AGXT,AHNAK2,AKAP2,AKAP6,AKNA,ALAD,ALDH1L1,ALDH5A1,ALDOB,ALPK2,AMPD1,AMPH,ANGPT1,ANGPT2,ANGPTL6,ANKRD20A4 (includes others),ANKRD35,ANKRD53,ANKS1B…
Neuromuscular disease	5.94e-08	-1.387	A2M,ABCG2,ACAT1,ACTN2,ACTN3,ADH1C,ADORA2A,ADORA2B,ADRA1A,ADRA1B,ADRA2B,AFM,AGRN,AGT,AIG1,AIMP2,ALDH2,ALDH6A1,ANXA2,APBB1,APOA4,APOE,AQP4,AREG,ASCL1,ATP1B1,ATP2A1,ATP2B2,BBOX1,BCHE,BCL11B,BCL2,BTC,C2orf40,C3,C5,C7,C9,CA12,CA3,CACNA1D,CACNA2D3,CAPN3,CASQ1,CCL5,CCR4,CD38,CD48,CD52,CDS1,CHAF1B,CHI3L1,CHRM2,CHRNA1,CHRNA4,CLU,COCH,COL13A1,COLGALT2,CP,CPNE5,CREB3L1,CTLA4,CTNNA3,CXCL1,CXCL12,CYP2D6,CYSLT…
Inflammatory demyelinating disease	6.21e-06	-1.387	ABCG2,ADORA2B,ADRA1A,ADRA1B,ADRA2B,AGT,AQP4,AREG,ASCL1,BCHE,BCL2,BTC,C3,C5,CCR4,CD52,CHRM2,CHRNA4,CREB3L1,CTNNA3,CXCL1,CXCL12,CYP2D6,CYSLTR1,CYSLTR2,EGR1,ESR1,ESR2,F2RL1,FCGR1B,FGF2,FGFR3,GABRA5,GABRB3,GABRE,GABRG3,GABRR2,GRIN2D,GRIN3A,HLA-DMA,HLA-DMB,HLA-DQA2,HLA-DQB1,HLA-DQB2,HLA-DRA,HLA-DRB1,HLA-F,IL7R,IMPDH1,IMPDH2,ISG15,ITGA4,KCNA2,KCNA3,KCNA5,KCND3,KCNH2,KCNMA1,KCNQ1,MIF,MS4A1,MUT,MX1,NOS2,…
Multiple Sclerosis	7.61e-06	-1.387	ABCG2,ADORA2B,ADRA1A,ADRA1B,ADRA2B,AGT,AREG,ASCL1,BCHE,BCL2,BTC,C3,C5,CCR4,CD52,CHRM2,CHRNA4,CREB3L1,CTNNA3,CXCL1,CXCL12,CYP2D6,CYSLTR1,CYSLTR2,EGR1,ESR1,ESR2,F2RL1,FCGR1B,FGF2,FGFR3,GABRA5,GABRB3,GABRE,GABRG3,GABRR2,GRIN2D,GRIN3A,HLA-DMA,HLA-DMB,HLA-DQA2,HLA-DQB1,HLA-DQB2,HLA-DRA,HLA-DRB1,HLA-F,IL7R,IMPDH1,IMPDH2,ISG15,ITGA4,KCNA2,KCNA3,KCNA5,KCND3,KCNH2,KCNMA1,KCNQ1,MIF,MS4A1,MUT,MX1,NOS2,NR3C1…
Systemic autoimmune syndrome	3.72e-14	-1.572	A1BG,ACOX2,ACSL1,ACTA1,ADA2,ADAM15,ADAM9,ADCY8,ADORA2A,ADRA2B,AGER,AGT,AGTR1,AHSG,AIF1,AKR1D1,ALAS2,ALDH2,ALDOA,ALOX15,ALPK2,ALPL,AMPD1,ANG,APOA1,APOE,APOM,AQP9,AR,AREG,ARG1,ATP1B1,BACH2,BHMT,BIRC5,BLK,BMP4,BMP5,BTC,C19orf57,C1QA,C1R,C1S,C2,C3,C3orf67,C5,C5orf30,C9orf152,CACNA1D,CACNA1H,CACNA1S,CACNB2,CALCR,CAMP,CAT,CCDC7,CCL14,CCL15,CCL16,CCL17,CCL18,CCL19,CCL20,CCL22,CCL3L1,CCL5,CCNB1,CCR2,CCR4…
Carcinoma	2.06e-23	-1.622	A1BG,A1CF,A2M,AADAC,AADAT,AASS,ABAT,ABCA10,ABCA12,ABCA4,ABCA5,ABCA6,ABCA8,ABCA9,ABCB11,ABCB4,ABCC11,ABCC2,ABCC6,ABCC9,ABCD2,ABCG2,ABCG5,ABCG8,ABHD11,ABHD17C,ABI3,ABO,ACAA1,ACACB,ACAD11,ACADL,ACADSB,ACAP1,ACAT1,ACCS,ACMSD,ACOT1,ACOT12,ACOT2,ACOX1,ACOXL,ACR,ACSL1,ACSM1,ACSM2A,ACSM2B,ACSM5,ACSS3,ACTA1,ACTG1,ACTG2,ACTN2,ACTN4,ADAM15,ADAM20,ADAM28,ADAM32,ADAM33,ADAM9,ADAMTS10,ADAMTS13,ADAMTS17,ADAMTSL…
Progressive neurological disorder	3.46e-06	-1.664	ABAT,ABCA8,ABCG2,ACTG1,ACTN3,ADH1C,ADORA2A,ADORA2B,ADRA1A,ADRA1B,ADRA2B,AGT,AIMP2,ALDH5A1,ANG,ANXA2,APBB1,APOE,AQP4,AR,AREG,ARSG,ASCL1,BBOX1,BCHE,BCL2,BSCL2,BTC,C3,C5,CACNA1D,CAPN3,CCR4,CD52,CDKN1A,CEBPA,CELF2,CHRM2,CHRNA1,CHRNA4,COCH,COLGALT2,CREB3L1,CTNNA3,CXCL1,CXCL12,CYP2D6,CYSLTR1,CYSLTR2,DAB1,DDC,DLG2,DNAJC6,E2F1,EGR1,ENO2,ENO3,ESR1,ESR2,ETS2,EZR,F2RL1,FABP3,FCGR1B,FGF2,FGFR3,FGFR4,FHDC1,FL…
Progressive motor neuron disease	4.03e-06	-1.664	ABAT,ABCA8,ABCG2,ACTN3,ADH1C,ADORA2A,ADORA2B,ADRA1A,ADRA1B,ADRA2B,AGT,AIMP2,ALDH5A1,ANG,ANXA2,APBB1,APOE,AQP4,AREG,ARSG,ASCL1,BBOX1,BCHE,BCL2,BTC,C3,C5,CACNA1D,CAPN3,CCR4,CD52,CDKN1A,CEBPA,CELF2,CHRM2,CHRNA1,CHRNA4,COLGALT2,CREB3L1,CTNNA3,CXCL1,CXCL12,CYP2D6,CYSLTR1,CYSLTR2,DAB1,DDC,DLG2,DNAJC6,E2F1,EGR1,ENO2,ENO3,ESR1,ESR2,ETS2,EZR,F2RL1,FABP3,FCGR1B,FGF2,FGFR3,FHDC1,GABRA5,GABRB3,GABRE,GABRG3,G…
Progressive motor neuropathy	7.89e-06	-1.664	ABAT,ABCA8,ABCG2,ACTN3,ADH1C,ADORA2A,ADORA2B,ADRA1A,ADRA1B,ADRA2B,AGT,AIMP2,ALDH5A1,ANG,ANXA2,APBB1,APOE,AQP4,AREG,ARSG,ASCL1,BBOX1,BCHE,BCL2,BTC,C3,C5,CACNA1D,CAPN3,CCR4,CD52,CDKN1A,CEBPA,CELF2,CHRM2,CHRNA1,CHRNA4,COLGALT2,CREB3L1,CTNNA3,CXCL1,CXCL12,CYP2D6,CYSLTR1,CYSLTR2,DAB1,DDC,DLG2,DNAJC6,E2F1,EGR1,ENO2,ENO3,ESR1,ESR2,ETS2,EZR,F2RL1,FABP3,FCGR1B,FGF2,FGFR3,FHDC1,GABRA5,GABRB3,GABRE,GABRG3,G…
Tumorigenesis of tissue	6.52e-26	-1.682	A1BG,A1CF,A2M,AADAC,AADAT,AASS,ABAT,ABCA10,ABCA12,ABCA4,ABCA5,ABCA6,ABCA8,ABCA9,ABCB11,ABCB4,ABCC11,ABCC2,ABCC6,ABCC9,ABCD2,ABCG2,ABCG5,ABCG8,ABHD11,ABHD17C,ABI3,ABO,ACAA1,ACACB,ACAD11,ACADL,ACADSB,ACAP1,ACAT1,ACCS,ACER2,ACMSD,ACOT1,ACOT12,ACOT2,ACOX1,ACOXL,ACR,ACSL1,ACSM1,ACSM2A,ACSM2B,ACSM5,ACSS3,ACTA1,ACTG1,ACTG2,ACTN2,ACTN4,ADAM15,ADAM20,ADAM28,ADAM32,ADAM33,ADAM9,ADAMTS10,ADAMTS13,ADAMTS17,A…
Neoplasia of epithelial tissue	1.35e-24	-1.682	A1BG,A1CF,A2M,AADAC,AADAT,AASS,ABAT,ABCA10,ABCA12,ABCA4,ABCA5,ABCA6,ABCA8,ABCA9,ABCB11,ABCB4,ABCC11,ABCC2,ABCC6,ABCC9,ABCD2,ABCG2,ABCG5,ABCG8,ABHD11,ABHD17C,ABI3,ABO,ACAA1,ACACB,ACAD11,ACADL,ACADSB,ACAP1,ACAT1,ACCS,ACMSD,ACOT1,ACOT12,ACOT2,ACOX1,ACOXL,ACR,ACSL1,ACSM1,ACSM2A,ACSM2B,ACSM5,ACSS3,ACTA1,ACTG1,ACTG2,ACTN2,ACTN4,ADAM15,ADAM20,ADAM28,ADAM32,ADAM33,ADAM9,ADAMTS10,ADAMTS13,ADAMTS17,ADAMTSL…
Blood clot	2.91e-14	-1.795	ABO,ADAMTS13,ANGPT1,ANGPT2,APOH,AR,BAAT,C3,C5,CFB,CFH,CFHR1,CFHR3,CFI,CPB2,CX3CR1,CYP2C19,ESR1,F10,F11,F12,F13B,F2,F3,F5,FGA,FGB,FGG,GABRA5,GGCX,GP1BA,HABP2,HRG,IL6,ITGA2B,KLKB1,KNG1,LRP8,MMP7,MS4A1,NNMT,NR3C1,P2RY1,P2RY12,PDE11A,PDE3A,PDE4B,PDE5A,PDE7B,PF4,PLG,PON1,PROC,PROS1,PTGER1,QPRT,RRM2,SELP,SERPINA10,SERPINA5,SERPINC1,SERPINF2,SLC7A11,STMN2,TFPI,THBS1,TMPRSS6
Migration of tumor cell lines	1.06e-06	-1.84	A2M,ACTN4,ADAM15,ADAM9,AGAP2,AGER,AGK,AGT,AIF1,ANGPT2,ANPEP,ANXA2,AR,AREG,ARHGAP11A,ARHGAP8/PRR5-ARHGAP8,ARHGEF16,ARHGEF6,ASCL1,AURKA,BAG1,BCL10,BMP2,BMP6,BRCA1,C1QBP,C5,CA9,CACNA1D,CAMP,CAT,CAV1,CCL17,CCL19,CCL20,CCL22,CCL5,CCND1,CCR2,CCR4,CCR5,CCR7,CD24,CD9,CDCP1,CDH2,CDH3,CDKN1A,CDKN3,CHN2,CLCN4,CLDN4,CLDN7,CLU,COL18A1,CREB3,CREB3L1,CSF2,CTBP2,CXCL11,CXCL12,DCDC2,DDX58,DTX1,E2F5,EBI3,ECT2,EDN1…
Thrombus	1.96e-11	-1.937	ABO,ADAMTS13,ANGPT1,ANGPT2,APOH,AR,BAAT,C3,C5,CFB,CFH,CFHR1,CFHR3,CFI,CX3CR1,CYP2C19,ESR1,F10,F13B,F2,F3,F5,FGA,FGB,FGG,GABRA5,GGCX,HABP2,HRG,IL6,ITGA2B,KNG1,LRP8,MMP7,MS4A1,NNMT,NR3C1,P2RY1,P2RY12,PDE11A,PDE3A,PDE4B,PDE5A,PDE7B,PLG,PON1,PROC,PROS1,PTGER1,QPRT,RRM2,SELP,SERPINA10,SERPINA5,SERPINC1,SLC7A11,STMN2,TFPI,THBS1
Skin tumor	1.67e-48	NaN	A1CF,A2M,AADAC,AADAT,ABAT,ABCA10,ABCA12,ABCA4,ABCA5,ABCA6,ABCA8,ABCA9,ABCB11,ABCB4,ABCC11,ABCC2,ABCC6,ABCC9,ABCD2,ABCG2,ABCG8,ABI3,ABO,ACAA1,ACACB,ACADL,ACADSB,ACAP1,ACCS,ACMSD,ACOT1,ACOT12,ACOX2,ACOXL,ACSM1,ACSM2A,ACSM2B,ACSM5,ACSS3,ACTG1,ACTN2,ADAM20,ADAM28,ADAM32,ADAM33,ADAM9,ADAMTS10,ADAMTS13,ADAMTS17,ADAMTSL2,ADAMTSL3,ADAMTSL4,ADAP1,ADCY1,ADCY10,ADCY8,ADD2,ADH1A,ADH1B,ADH4,ADH6,ADHFE1,ADORA2…
Skin cancer	1.78e-48	NaN	A1CF,A2M,AADAC,AADAT,ABAT,ABCA10,ABCA12,ABCA4,ABCA5,ABCA6,ABCA8,ABCA9,ABCB11,ABCB4,ABCC11,ABCC2,ABCC6,ABCC9,ABCD2,ABCG2,ABCG8,ABI3,ABO,ACAA1,ACACB,ACADL,ACADSB,ACAP1,ACCS,ACMSD,ACOT1,ACOT12,ACOX2,ACOXL,ACSM1,ACSM2A,ACSM2B,ACSM5,ACSS3,ACTG1,ACTN2,ADAM20,ADAM28,ADAM32,ADAM33,ADAM9,ADAMTS10,ADAMTS13,ADAMTS17,ADAMTSL2,ADAMTSL3,ADAMTSL4,ADAP1,ADCY1,ADCY10,ADCY8,ADD2,ADH1A,ADH1B,ADH4,ADH6,ADHFE1,ADORA2…
Cutaneous melanoma	2.54e-45	NaN	A1CF,A2M,AADAC,ABAT,ABCA10,ABCA12,ABCA4,ABCA5,ABCA6,ABCA8,ABCA9,ABCB11,ABCB4,ABCC11,ABCC2,ABCC6,ABCC9,ABCD2,ABCG2,ABCG8,ABI3,ABO,ACAA1,ACACB,ACADL,ACADSB,ACAP1,ACCS,ACMSD,ACOT1,ACOT12,ACOX2,ACOXL,ACSM1,ACSM2A,ACSM2B,ACSM5,ACSS3,ACTG1,ACTN2,ADAM20,ADAM28,ADAM32,ADAM33,ADAM9,ADAMTS10,ADAMTS13,ADAMTS17,ADAMTSL2,ADAMTSL3,ADAMTSL4,ADAP1,ADCY1,ADCY10,ADCY8,ADD2,ADH1A,ADH1B,ADH4,ADH6,ADHFE1,ADORA2A,ADRA…
Uterine serous papillary cancer	4.57e-33	NaN	ABCA8,ACTG2,ADH1A,ADH1B,ALDH1A1,ANXA2,ANXA3,AURKA,BCL2,BIK,BUB1,BUB1B,C7,CACNB2,CBS/CBSL,CCL15,CCNA2,CCNB1,CCNB2,CCNE1,CDC20,CDC6,CENPA,CFB,CHRDL1,CIT,CLDN3,CLDN4,CLDN5,CLDN7,CLEC3B,CNN1,COL14A1,CPA3,CXCL12,DES,DKK1,DPT,DST,ECM2,ENPEP,ENPP1,ENPP2,EPHB2,ESPL1,ETV4,EXO1,F13A1,F2RL1,FBLN5,FEN1,FGL2,FLRT2,FOXD1,FOXM1,FXYD1,GALNT3,GPM6A,GPRASP1,GPRC5A,GRB7,GUCY1A1,GZMA,GZMK,HEPH,HLF,HMGA1,HMMR,HSD17B6…
Female genital tract serous carcinoma	2.15e-29	NaN	ABCA8,ACTG2,ADH1A,ADH1B,ALDH1A1,ANXA2,ANXA3,ANXA8/ANXA8L1,APOE,AR,ATP8B1,AURKA,AXIN2,BCL10,BCL2,BIK,BRCA1,BUB1,BUB1B,C2orf88,C7,CACNB2,CALB2,CBS/CBSL,CCL15,CCNA2,CCNB1,CCNB2,CCNE1,CD24,CDC20,CDC6,CDKN1A,CENPA,CFB,CFH,CHRDL1,CIT,CLDN3,CLDN4,CLDN5,CLDN7,CLEC3B,CLU,CMTM4,CNN1,COL14A1,CP,CPA3,CXCL12,DES,DHTKD1,DIRAS3,DKK1,DPT,DST,DTNA,ECM2,ELF3,ENPEP,ENPP1,ENPP2,EPCAM,EPHB2,EPHB6,EPPK1,ESPL1,ESR2,ETV…
Serous adenocarcinoma	1.51e-24	NaN	ABCA8,ABCC11,ACTG2,ADAMTSL3,ADH1A,ADH1B,ADORA2A,AKAP2,ALDH1A1,ANGPT1,ANKRD24,ANXA2,ANXA3,ANXA8/ANXA8L1,APCDD1,APOE,AR,ASB2,ATG2B,ATP1B1,ATP8B1,ATP8B2,AURKA,AXIN2,BCL10,BCL2,BIK,BRCA1,BSN,BUB1,BUB1B,C2orf88,C3orf52,C7,C8B,CACNB2,CALB2,CBS/CBSL,CCL15,CCNA2,CCNB1,CCNB2,CCNE1,CD24,CDC20,CDC6,CDKN1A,CENPA,CFB,CFH,CHEK1,CHRDL1,CIT,CLDN3,CLDN4,CLDN5,CLDN7,CLEC17A,CLEC3B,CLU,CMTM4,CNN1,COCH,COL14A1,CORIN…
Tumorigenesis of epithelial neoplasm	1.59e-24	NaN	A1CF,A2M,AASS,ABCA10,ABCA12,ABCA4,ABCA5,ABCA6,ABCA8,ABCA9,ABCB4,ABCC11,ABCC2,ABCC6,ABCC9,ABCG2,ABCG5,ABHD11,ABI3,ACACB,ACAD11,ACADSB,ACAT1,ACMSD,ACOT1,ACOT12,ACOX1,ACSL1,ACSM1,ACSM2B,ACTA1,ACTG1,ACTN2,ACTN4,ADAM28,ADAM32,ADAM9,ADAMTS10,ADAMTS13,ADAMTSL3,ADAMTSL4,ADAT3,ADCY1,ADCY10,ADCY8,ADD2,ADGRB3,ADH1A,ADH1C,ADHFE1,ADI1,ADORA2A,ADORA2B,ADRA1A,ADRA1B,ADTRP,AFAP1L2,AFF3,AFM,AGAP2,AGAP5 (includes …
Serous neoplasm	4.63e-24	NaN	ABCA8,ABCC11,ABCC9,ACTG2,ADAMTSL3,ADH1A,ADH1B,ADORA2A,AKAP2,ALDH1A1,ANGPT1,ANKRD24,ANXA2,ANXA3,ANXA8/ANXA8L1,APCDD1,APOE,AR,ASB2,ATG2B,ATP1B1,ATP8B1,ATP8B2,AURKA,AXIN2,BCL10,BCL2,BIK,BRCA1,BSN,BUB1,BUB1B,C2orf88,C3orf52,C7,C8B,CACNB2,CALB2,CBS/CBSL,CCL15,CCNA2,CCNB1,CCNB2,CCNE1,CD24,CDC20,CDC6,CDKN1A,CENPA,CFB,CFH,CHEK1,CHRDL1,CIT,CLDN3,CLDN4,CLDN5,CLDN7,CLEC17A,CLEC3B,CLU,CMTM4,CNN1,COCH,COL14A1…
Abdominal adenocarcinoma	6.82e-22	NaN	A1BG,A2M,AASS,ABCA10,ABCA12,ABCA4,ABCA5,ABCA6,ABCA8,ABCA9,ABCB11,ABCB4,ABCC11,ABCC2,ABCC6,ABCC9,ABCG2,ABCG5,ABHD11,ABI3,ABO,ACACB,ACAD11,ACADSB,ACAP1,ACAT1,ACMSD,ACOT1,ACOT12,ACOX1,ACOXL,ACSL1,ACSM1,ACSM2B,ACSM5,ACSS3,ACTA1,ACTG1,ACTG2,ACTN2,ACTN4,ADAM28,ADAM32,ADAM33,ADAM9,ADAMTS10,ADAMTS13,ADAMTS17,ADAMTSL3,ADAMTSL4,ADAP1,ADAT3,ADCY1,ADCY10,ADCY8,ADD2,ADH1A,ADH1B,ADH1C,ADH4,ADHFE1,ADORA2A,ADORA…
Female genital tract cancer	1.03e-21	NaN	A1BG,A1CF,AASS,ABAT,ABCA10,ABCA12,ABCA4,ABCA5,ABCA6,ABCA8,ABCA9,ABCB4,ABCC11,ABCC2,ABCC6,ABCC9,ABCG2,ABCG5,ACACB,ACAD11,ACADSB,ACOT12,ACOX1,ACSL1,ACSM1,ACSM2B,ACTG1,ACTG2,ACTN4,ADAM9,ADAMTS10,ADAMTSL3,ADAMTSL4,ADCY1,ADCY10,ADD2,ADGRB3,ADH1A,ADH1B,ADI1,ADORA2A,ADRA1A,AFAP1L2,AFF3,AFM,AGAP2,AGAP5 (includes others),AGK,AGMO,AGT,AGXT2,AHNAK2,AIF1,AJAP1,AK7,AKAP2,AKAP6,AKNA,AKR1B1,AKR1C1/AKR1C2,ALDH1A…
Female genital neoplasm	2.47e-21	NaN	A1BG,A1CF,AASS,ABAT,ABCA10,ABCA12,ABCA4,ABCA5,ABCA6,ABCA8,ABCA9,ABCB4,ABCC11,ABCC2,ABCC6,ABCC9,ABCG2,ABCG5,ACACB,ACAD11,ACADSB,ACOT12,ACOX1,ACSL1,ACSM1,ACSM2B,ACTG1,ACTG2,ACTN4,ADAM9,ADAMTS10,ADAMTSL3,ADAMTSL4,ADCY1,ADCY10,ADD2,ADGRB3,ADH1A,ADH1B,ADI1,ADORA2A,ADRA1A,ADRA1B,ADRA2B,AFAP1L2,AFF3,AFM,AGAP2,AGAP5 (includes others),AGK,AGMO,AGT,AGXT2,AHNAK2,AIF1,AIG1,AJAP1,AK7,AKAP2,AKAP6,AKNA,AKR1B1,A…
Tumorigenesis of carcinoma	2.85e-21	NaN	A1CF,A2M,AASS,ABCA10,ABCA12,ABCA4,ABCA5,ABCA6,ABCA8,ABCA9,ABCB4,ABCC11,ABCC2,ABCC6,ABCC9,ABCG5,ABHD11,ABI3,ACACB,ACAD11,ACADSB,ACAT1,ACMSD,ACOT1,ACOT12,ACOX1,ACSL1,ACSM1,ACSM2B,ACTA1,ACTG1,ACTN2,ACTN4,ADAM28,ADAM32,ADAM9,ADAMTS10,ADAMTS13,ADAMTSL3,ADAMTSL4,ADAT3,ADCY1,ADCY10,ADCY8,ADD2,ADGRB3,ADH1A,ADH1C,ADHFE1,ADI1,ADORA2A,ADORA2B,ADRA1A,ADRA1B,AFAP1L2,AFF3,AFM,AGAP2,AGAP5 (includes others),AGBL…
Tumorigenesis of reproductive tract	3.42e-21	NaN	A1BG,A1CF,AASS,ABAT,ABCA10,ABCA12,ABCA4,ABCA5,ABCA6,ABCA8,ABCA9,ABCB4,ABCC11,ABCC2,ABCC6,ABCC9,ABCG2,ABCG5,ACACB,ACAD11,ACADSB,ACOT12,ACOX1,ACSL1,ACSM1,ACSM2B,ACTG1,ACTG2,ACTN4,ADAM9,ADAMTS10,ADAMTSL3,ADAMTSL4,ADCY1,ADCY10,ADD2,ADGRB3,ADH1A,ADH1B,ADI1,ADORA2A,ADRA1A,ADRA1B,ADRA2B,AFAP1L2,AFF3,AFM,AGAP2,AGAP5 (includes others),AGK,AGMO,AGT,AGXT2,AHNAK2,AIF1,AIG1,AJAP1,AK7,AKAP2,AKAP6,AKNA,AKR1B1,A…
Abdominal carcinoma	2.11e-20	NaN	A1BG,A1CF,A2M,AASS,ABCA10,ABCA12,ABCA4,ABCA5,ABCA6,ABCA8,ABCA9,ABCB11,ABCB4,ABCC11,ABCC2,ABCC6,ABCC9,ABCG2,ABCG5,ABHD11,ABI3,ABO,ACACB,ACAD11,ACADSB,ACAP1,ACAT1,ACMSD,ACOT1,ACOT12,ACOX1,ACOXL,ACSL1,ACSM1,ACSM2B,ACSM5,ACSS3,ACTA1,ACTG1,ACTG2,ACTN2,ACTN4,ADAM28,ADAM32,ADAM33,ADAM9,ADAMTS10,ADAMTS13,ADAMTS17,ADAMTSL3,ADAMTSL4,ADAP1,ADAT3,ADCY1,ADCY10,ADCY8,ADD2,ADH1A,ADH1B,ADH1C,ADH4,ADHFE1,ADI1,ADO…
Adenocarcinoma	2.12e-20	NaN	A1BG,A1CF,A2M,AADAT,AASS,ABAT,ABCA10,ABCA12,ABCA4,ABCA5,ABCA6,ABCA8,ABCA9,ABCB11,ABCB4,ABCC11,ABCC2,ABCC6,ABCC9,ABCD2,ABCG2,ABCG5,ABHD11,ABI3,ABO,ACAA1,ACACB,ACAD11,ACADSB,ACAP1,ACAT1,ACCS,ACMSD,ACOT1,ACOT12,ACOX1,ACOXL,ACSL1,ACSM1,ACSM2A,ACSM2B,ACSM5,ACSS3,ACTA1,ACTG1,ACTG2,ACTN2,ACTN4,ADAM20,ADAM28,ADAM32,ADAM33,ADAM9,ADAMTS10,ADAMTS13,ADAMTS17,ADAMTSL2,ADAMTSL3,ADAMTSL4,ADAP1,ADAT3,ADCY1,ADCY1…
Benign lesion	2.59e-19	NaN	ABCA8,ABCG2,ACKR1,ADGRB3,ADH1B,ADRA1A,ADRA1B,ADRA2B,ADTRP,AGER,AGRN,AIG1,ALDH1A1,ALDH1B1,ALDOA,ANGPT1,ANGPT2,ANGPTL1,ANXA3,ANXA8/ANXA8L1,APCS,APOA1,APOE,AR,ARL4D,ARSE,ASAP3,ASB2,ATP1A1,ATP8B1,ATRN,ATRNL1,AURKB,AXIN2,BACE2,BCL10,BCL2,BDH1,BMP4,BMP5,BRCA1,BYSL,C1orf115,C2orf88,C3orf67,C5orf30,C9orf16,CA12,CACNA1D,CACNB2,CALB2,CARD11,CCL15,CCNB1,CCND1,CCNE1,CCNE2,CCR5,CD24,CD48,CDH2,CDH23,CDH3,CDK1,…
Female genital tract adenocarcinoma	5.89e-19	NaN	AASS,ABCA10,ABCA12,ABCA4,ABCA5,ABCA6,ABCA8,ABCA9,ABCB4,ABCC11,ABCC2,ABCC6,ABCC9,ABCG5,ACACB,ACAD11,ACADSB,ACOT12,ACOX1,ACSL1,ACSM1,ACSM2B,ACTG1,ACTG2,ACTN4,ADAM9,ADAMTS10,ADAMTSL3,ADAMTSL4,ADCY1,ADCY10,ADD2,ADH1A,ADH1B,ADORA2A,ADRA1A,AFAP1L2,AFF3,AGAP2,AGAP5 (includes others),AGK,AGMO,AGT,AGXT2,AHNAK2,AIF1,AJAP1,AK7,AKAP2,AKAP6,AKNA,AKR1B1,AKR1C1/AKR1C2,ALDH1A1,ALDH1B1,ALDH1L1,ALDH4A1,ALDH8A1,ALD…
Benign neoplasia	1.23e-18	NaN	ABCA8,ABCG2,ACKR1,ADGRB3,ADH1B,ADRA1A,ADRA1B,ADRA2B,ADTRP,AGER,AGRN,AIG1,ALDH1A1,ALDH1B1,ALDOA,ANGPT1,ANGPT2,ANGPTL1,ANXA3,ANXA8/ANXA8L1,APCS,APOA1,APOE,AR,ARL4D,ARSE,ASAP3,ASB2,ATP1A1,ATP8B1,ATRN,ATRNL1,AURKB,AXIN2,BACE2,BCL10,BCL2,BDH1,BMP4,BMP5,BRCA1,BYSL,C1orf115,C2orf88,C3orf67,C5orf30,C9orf16,CA12,CACNA1D,CACNB2,CALB2,CARD11,CCL15,CCNB1,CCND1,CCNE1,CCNE2,CCR5,CD24,CD48,CDH2,CDH23,CDH3,CDK1,…
Uterine tumor	1.33e-17	NaN	A1CF,AASS,ABAT,ABCA10,ABCA12,ABCA4,ABCA5,ABCA6,ABCA8,ABCA9,ABCB4,ABCC11,ABCC2,ABCC6,ABCC9,ABCG2,ABCG5,ACACB,ACADSB,ACOT12,ACOX1,ACSL1,ACSM1,ACSM2B,ACTG2,ACTN4,ADAM9,ADAMTSL4,ADCY1,ADCY10,ADH1A,ADH1B,ADI1,ADRA1A,ADRA1B,ADRA2B,AFAP1L2,AGAP5 (includes others),AGK,AGMO,AGT,AGXT2,AHNAK2,AIG1,AJAP1,AK7,AKAP6,AKR1B1,AKR1C1/AKR1C2,ALDH1A1,ALDH1B1,ALDH1L1,ALDH4A1,ALDH5A1,ALDH8A1,ALDOA,ALDOB,ALPK2,ALPK3,AL…
Endometrial cancer	1.8e-17	NaN	A1CF,AASS,ABCA10,ABCA12,ABCA4,ABCA5,ABCA6,ABCA8,ABCA9,ABCB4,ABCC11,ABCC2,ABCC6,ABCC9,ABCG2,ABCG5,ACACB,ACADSB,ACOT12,ACOX1,ACSL1,ACSM1,ACSM2B,ACTG2,ACTN4,ADAM9,ADAMTSL4,ADCY1,ADCY10,ADH1A,ADH1B,ADI1,ADRA1A,AFAP1L2,AGAP5 (includes others),AGK,AGMO,AGT,AGXT2,AHNAK2,AJAP1,AK7,AKAP6,AKR1C1/AKR1C2,ALDH1A1,ALDH1B1,ALDH1L1,ALDH4A1,ALDH8A1,ALDOB,ALPK2,ALPK3,AMPD1,AMPH,ANGPT2,ANGPTL3,ANK2,ANKDD1A,ANKRD18A…
Abnormality of endometrium	4.62e-17	NaN	A1CF,AASS,ABCA10,ABCA12,ABCA4,ABCA5,ABCA6,ABCA8,ABCA9,ABCB4,ABCC11,ABCC2,ABCC6,ABCC9,ABCG2,ABCG5,ACACB,ACADSB,ACOT12,ACOX1,ACSL1,ACSM1,ACSM2B,ACTG2,ACTN4,ADAM9,ADAMTSL4,ADAP1,ADCY1,ADCY10,ADH1A,ADH1B,ADI1,ADRA1A,AFAP1L2,AGAP5 (includes others),AGK,AGMO,AGT,AGXT2,AHNAK2,AJAP1,AK7,AKAP6,AKR1C1/AKR1C2,ALDH1A1,ALDH1B1,ALDH1L1,ALDH4A1,ALDH8A1,ALDOB,ALPK2,ALPK3,AMPD1,AMPH,ANGPT2,ANGPTL3,ANK2,ANKDD1A,AN…
Abnormal growth in endometrium	5.4e-17	NaN	A1CF,AASS,ABCA10,ABCA12,ABCA4,ABCA5,ABCA6,ABCA8,ABCA9,ABCB4,ABCC11,ABCC2,ABCC6,ABCC9,ABCG2,ABCG5,ACACB,ACADSB,ACOT12,ACOX1,ACSL1,ACSM1,ACSM2B,ACTG2,ACTN4,ADAM9,ADAMTSL4,ADAP1,ADCY1,ADCY10,ADH1A,ADH1B,ADI1,ADRA1A,AFAP1L2,AGAP5 (includes others),AGK,AGMO,AGT,AGXT2,AHNAK2,AJAP1,AK7,AKAP6,AKR1C1/AKR1C2,ALDH1A1,ALDH1B1,ALDH1L1,ALDH4A1,ALDH8A1,ALDOB,ALPK2,ALPK3,AMPD1,AMPH,ANGPT2,ANGPTL3,ANK2,ANKDD1A,AN…
Uterine cancer	8.33e-17	NaN	A1CF,AASS,ABAT,ABCA10,ABCA12,ABCA4,ABCA5,ABCA6,ABCA8,ABCA9,ABCB4,ABCC11,ABCC2,ABCC6,ABCC9,ABCG2,ABCG5,ACACB,ACADSB,ACOT12,ACOX1,ACSL1,ACSM1,ACSM2B,ACTG2,ACTN4,ADAM9,ADAMTSL4,ADCY1,ADCY10,ADH1A,ADH1B,ADI1,ADRA1A,AFAP1L2,AGAP5 (includes others),AGK,AGMO,AGT,AGXT2,AHNAK2,AJAP1,AK7,AKAP6,AKR1C1/AKR1C2,ALDH1A1,ALDH1B1,ALDH1L1,ALDH4A1,ALDH5A1,ALDH8A1,ALDOB,ALPK2,ALPK3,AMPD1,AMPH,ANGPT2,ANGPTL3,ANK2,ANK…
Progressive intrahepatic cholestasis	1.91e-16	NaN	ABCB11,ABCB4,ABCC2,ABCG2,ACSL1,ADH1C,ADH4,ADH6,AKR1D1,ATP8B1,BAAT,CYP27A1,CYP7A1,GK,GPX2,GSTA2,HPX,LBP,LIPC,LPA,MGST1,MTTP,MUT,NR0B2,NR1H4,PAH,RDH16,SCD,SCP2,SLC10A1,SLC12A2,SLC17A1,SLC22A1,SLCO1B1,SULT1A1,SULT1A2,UGP2,UGT2B10,UGT2B15,UGT2B7
Adenoma	2.54e-16	NaN	ABCA8,ABCG2,ADTRP,ANXA3,ANXA8/ANXA8L1,APCS,APOA1,APOE,AR,ASAP3,ASB2,ATP1A1,ATP8B1,AXIN2,BACE2,BCL10,BCL2,BRCA1,BYSL,C1orf115,C2orf88,C3orf67,C5orf30,C9orf16,CA12,CACNA1D,CALB2,CCNB1,CCND1,CD24,CD48,CDH2,CDH23,CDH3,CDK1,CDKN1A,CDKN2B,CEMIP,CES2,CFH,CFHR3,CLDN2,CLDN3,CLDN7,CLEC3B,CLMN,CLU,CMTM4,CNNM4,CP,CYP21A2,DAPK1,DGAT2,DHRS11,DHTKD1,DIRAS3,DKC1,DNASE1L3,DPT,DTNA,ELF3,ENPEP,EPCAM,EPHB3,EPHB6,EPP…
Hepatocellular carcinoma	2.71e-16	NaN	ABCA8,ABCB11,ACOT1,ACTG1,ADAM32,ADAM9,ADGRG1,ADRA1A,AFP,AGXT2,AKR1B10,AKR1C1/AKR1C2,AKR1D1,ALDH2,ALDH8A1,AMPH,ANGPTL6,ANLN,APOB,APOF,AQP7,AREG,ARG1,ARHGAP22,ARL2,ASF1B,ASRGL1,ATP1A1,ATP1B1,AURKA,AXIN2,BCO2,BUB1,C3,C7,C8A,C9,CASR,CCDC113,CCDC122,CCL19,CCL20,CCNA2,CCNB1,CCND1,CD24,CD247,CD5L,CDHR2,CDK14,CDKN1A,CDKN3,CEACAM5,CENPF,CENPH,CES2,CETP,CFHR3,CFHR4,CFP,CKS2,CLDN2,CLEC1B,CLEC4G,CLEC4M,CNDP1…
Progressive familial intrahepatic cholestasis type 1	3.01e-16	NaN	ABCB11,ABCC2,ABCG2,ACSL1,ADH1C,ADH4,ADH6,AKR1D1,ATP8B1,BAAT,CYP27A1,CYP7A1,GK,GPX2,GSTA2,HPX,LBP,LIPC,LPA,MGST1,MTTP,MUT,NR0B2,NR1H4,PAH,RDH16,SCD,SCP2,SLC10A1,SLC12A2,SLC17A1,SLC22A1,SLCO1B1,SULT1A1,SULT1A2,UGP2,UGT2B10,UGT2B15,UGT2B7
Tumorigenesis of digestive organ tumor	4.29e-16	NaN	A2M,AASS,ABCA10,ABCA12,ABCA4,ABCA5,ABCA6,ABCA8,ABCA9,ABCC11,ABCC6,ABCC9,ABCG5,ABI3,ACACB,ACAT1,ACMSD,ACOT12,ACOX1,ACTA1,ACTG1,ACTN2,ADAM28,ADAM32,ADAM9,ADAMTS10,ADAMTS13,ADAMTSL4,ADAT3,ADCY10,ADCY8,ADD2,ADHFE1,ADORA2A,ADRA1A,ADRA1B,AFAP1L2,AFF3,AFM,AGAP5 (includes others),AGBL2,AGMO,AGRN,AGXT,AHNAK2,AHSA2P,AHSG,AJAP1,AKAP2,AKAP6,AKR1B1,AKR1B10,AKR1C1/AKR1C2,ALAS2,ALDH1A1,ALDH1B1,ALDH1L1,ALDH2,ALD…
Diabetes mellitus	1.23e-15	NaN	ACAA1,ACSL1,ADCY1,ADORA2B,ADRA1A,ADRA1B,ADRA2B,AGER,AGT,AGTR1,AHSG,AIF1,AKR1B1,ALDH1A1,ALDH2,ALPL,AMBP,AMY2B,ANK2,ANKRD44,APOA1,APOB,APOC1,APOC3,APOE,APOM,AR,ASB2,BACH2,BCL2,BLK,BMP2,BSCL2,C3,C3orf67,C5,CA12,CA14,CA3,CA5A,CA9,CACNA1D,CACNA1S,CACNA2D3,CACNB2,CALCR,CAPN3,CAV1,CCL16,CCND1,CCR2,CCR5,CD24,CD38,CD40LG,CD52,CDKN1A,CDS1,CEL,CETP,CFB,CHI3L1,CHRM2,CLEC2B,CLEC2D,CLEC3B,CLIC5,CLU,CMAHP,COL10…
Hepatobiliary system cancer	1.38e-15	NaN	A1BG,A1CF,AADAC,AASS,ABCA10,ABCA12,ABCA4,ABCA5,ABCA8,ABCA9,ABCB11,ABCB4,ABCC11,ABCC2,ABCC6,ABCC9,ABCD2,ABCG8,ABI3,ACAA1,ACACB,ACADSB,ACOT1,ACOX1,ACSL1,ACTG1,ACTG2,ADAM15,ADAM28,ADAM32,ADAM33,ADAM9,ADAMTS10,ADAMTS13,ADAMTS17,ADAMTSL3,ADAMTSL4,ADCY1,ADCY10,ADCY8,ADGRG1,ADH1A,ADH1B,ADH1C,ADH4,ADRA1A,ADRA2B,ADTRP,AFF3,AFP,AGER,AGK,AGRN,AGT,AGXT2,AHNAK2,AHSG,AIFM3,AIG1,AJAP1,AKAP6,AKNA,AKR1B10,AKR1C1/…
Prostate cancer	1.73e-15	NaN	A1CF,A2M,ABCA12,ABCA4,ABCB4,ABCC11,ABCC9,ABCG2,ABO,ACACB,ACOX1,ACSM1,ADAM15,ADAM32,ADAM9,ADAMTS13,ADCY1,ADCY10,ADCY8,ADD2,ADRA1A,ADRA1B,ADRA2B,AFAP1L2,AFM,AFP,AGAP2,AGAP5 (includes others),AGER,AGT,AGTR1,AK7,AKAP2,AKAP6,AKNA,AKR1B1,ALDH18A1,ALDH1L1,ALDH2,ALDH4A1,ALDH5A1,ALDOB,ALOX15,ALPK2,ALPK3,ALPL,AMPD1,AMT,AMY2B,ANGPTL1,ANK2,ANKAR,ANKRD1,ANKRD13B,ANKRD20A4 (includes others),ANKRD35,ANKS1B,ANLN…
Tumorigenesis of benign tumor	1.86e-15	NaN	ABCA8,ABCG2,ADTRP,ANXA3,ANXA8/ANXA8L1,APCS,APOA1,APOE,AR,ASAP3,ASB2,ATP1A1,ATP8B1,AXIN2,BACE2,BCL10,BCL2,BRCA1,BYSL,C1orf115,C2orf88,C3orf67,C5orf30,C9orf16,CA12,CACNA1D,CALB2,CARD11,CCNB1,CCND1,CD24,CD48,CDH2,CDH23,CDH3,CDK1,CDKN1A,CDKN2B,CEMIP,CES2,CFH,CFHR3,CLDN2,CLDN3,CLDN7,CLEC3B,CLMN,CLU,CMTM4,CNNM4,CP,CRLF2,CYP21A2,CYP2C19,CYP2D6,DAPK1,DGAT2,DHRS11,DHTKD1,DIRAS3,DKC1,DMD,DNASE1L3,DPT,DTNA,…
Liver cancer	2.02e-15	NaN	A1BG,A1CF,AADAC,AASS,ABCA10,ABCA12,ABCA4,ABCA5,ABCA8,ABCA9,ABCB11,ABCB4,ABCC11,ABCC2,ABCC6,ABCC9,ABCD2,ABCG8,ABI3,ACAA1,ACACB,ACADSB,ACOT1,ACOX1,ACSL1,ACTG1,ACTG2,ADAM15,ADAM28,ADAM32,ADAM33,ADAM9,ADAMTS10,ADAMTS13,ADAMTS17,ADAMTSL3,ADAMTSL4,ADCY1,ADCY10,ADCY8,ADGRG1,ADH1A,ADH1B,ADH4,ADRA1A,ADRA2B,ADTRP,AFF3,AFP,AGER,AGK,AGRN,AGT,AGXT2,AHNAK2,AHSG,AIFM3,AIG1,AJAP1,AKAP6,AKNA,AKR1B10,AKR1C1/AKR1C2…
Colon tumor	6.93e-15	NaN	ABCA10,ABCA12,ABCA4,ABCA5,ABCA6,ABCA8,ABCA9,ABCC11,ABCC6,ABCG5,ABI3,ACACB,ACAT1,ACMSD,ACOT12,ACOX1,ACTA1,ACTG1,ACTN2,ADAM28,ADAM32,ADAMTS10,ADAMTS13,ADAMTSL4,ADCY10,ADCY8,ADD2,ADORA2A,ADRA1A,ADRA1B,AFAP1L2,AFF3,AFM,AGAP5 (includes others),AGBL2,AGMO,AGRN,AHNAK2,AHSA2P,AHSG,AJAP1,AKAP2,AKAP6,AKR1B1,AKR1B10,ALAS2,ALDH1B1,ALDH1L1,ALDH2,ALDH6A1,ALDH8A1,ALDOA,ALOX15,ALPK2,ALPK3,ALPL,ALYREF,AMPD1,ANGPT…
Gastrointestinal adenocarcinoma	1.51e-14	NaN	A2M,AASS,ABCA10,ABCA12,ABCA4,ABCA5,ABCA6,ABCA8,ABCA9,ABCC11,ABCC6,ABCC9,ABCG5,ABI3,ACACB,ACAT1,ACMSD,ACOT12,ACSS3,ACTA1,ACTG1,ACTN2,ADAM28,ADAM32,ADAMTS10,ADAMTS13,ADAMTSL4,ADAT3,ADCY10,ADCY8,ADD2,ADHFE1,ADORA2A,ADRA1A,ADRA1B,AFAP1L2,AFF3,AFM,AGAP5 (includes others),AGBL2,AGMO,AGRN,AGTR1,AGXT,AHNAK2,AHSA2P,AHSG,AJAP1,AKAP2,AKAP6,AKR1B1,AKR1B10,AKR1C1/AKR1C2,ALAS2,ALDH1A1,ALDH1B1,ALDH1L1,ALDH2,ALD…
Colon cancer	2.41e-14	NaN	ABCA10,ABCA12,ABCA4,ABCA5,ABCA6,ABCA8,ABCA9,ABCC11,ABCC6,ABCG5,ABI3,ACACB,ACAT1,ACMSD,ACOT12,ACOX1,ACTA1,ACTG1,ACTN2,ADAM28,ADAM32,ADAMTS10,ADAMTS13,ADAMTSL4,ADCY10,ADCY8,ADD2,ADORA2A,ADRA1A,ADRA1B,AFAP1L2,AFF3,AFM,AGAP5 (includes others),AGBL2,AGMO,AGRN,AHNAK2,AHSA2P,AHSG,AJAP1,AKAP2,AKAP6,AKR1B1,AKR1B10,ALAS2,ALDH1B1,ALDH1L1,ALDH2,ALDH6A1,ALDH8A1,ALDOA,ALOX15,ALPK2,ALPK3,ALPL,AMPD1,ANGPT1,ANGPT…
Genitourinary carcinoma	3.24e-14	NaN	A1CF,A2M,AASS,ABCA10,ABCA12,ABCA4,ABCA5,ABCA6,ABCA8,ABCA9,ABCB4,ABCC11,ABCC2,ABCC6,ABCC9,ABCG2,ABCG5,ABHD11,ABO,ACACB,ACAD11,ACADSB,ACAT1,ACOT1,ACOT12,ACOX1,ACR,ACSL1,ACSM1,ACSM2B,ACSS3,ACTG1,ACTN4,ADAM28,ADAM32,ADAM9,ADAMTS10,ADAMTS13,ADAMTSL3,ADAMTSL4,ADCY1,ADCY10,ADCY8,ADD2,ADH1A,ADI1,ADORA2A,ADORA2B,ADRA1A,ADRA1B,ADRA2B,AFAP1L2,AFF3,AFM,AFP,AGAP2,AGAP5 (includes others),AGER,AGK,AGMO,AGT,AGXT…
Cholestasis	6.42e-14	NaN	ABCB11,ABCB4,ABCC2,ABCG2,ACSL1,ADH1C,ADH4,ADH6,AKR1D1,APOA1,ATP8B1,BAAT,CYP27A1,CYP7A1,CYP7B1,GK,GPX2,GSTA2,HGF,HPX,IL6,LBP,LIPC,LPA,MGST1,MTTP,MUT,NR0B2,NR1H4,PAH,RDH16,SCD,SCP2,SLC10A1,SLC12A2,SLC17A1,SLC22A1,SLCO1B1,SULT1A1,SULT1A2,UGP2,UGT2B10,UGT2B15,UGT2B7
Liver tumor	9.29e-14	NaN	A1BG,A1CF,A2M,AADAC,AASS,ABCA10,ABCA12,ABCA4,ABCA5,ABCA6,ABCA8,ABCA9,ABCB11,ABCB4,ABCC11,ABCC2,ABCC6,ABCC9,ABCD2,ABCG8,ABI3,ACAA1,ACACB,ACAD11,ACADSB,ACAP1,ACAT1,ACBD4,ACMSD,ACOT1,ACOX1,ACOXL,ACR,ACSL1,ACSM2A,ACSM2B,ACSM5,ACSS3,ACTA1,ACTG1,ACTG2,ACTN2,ACTN4,ADAM15,ADAM20,ADAM28,ADAM32,ADAM33,ADAM9,ADAMTS10,ADAMTS13,ADAMTS17,ADAMTSL3,ADAMTSL4,ADAP1,ADCY1,ADCY10,ADCY8,ADD2,ADGRG1,ADH1A,ADH1B,ADH4,A…
Gastrointestinal carcinoma	9.51e-14	NaN	A1BG,A2M,AADAT,AASS,ABCA10,ABCA12,ABCA4,ABCA5,ABCA6,ABCA8,ABCA9,ABCB11,ABCB4,ABCC11,ABCC2,ABCC6,ABCC9,ABCD2,ABCG5,ABHD11,ABI3,ACAA1,ACACB,ACADSB,ACAP1,ACAT1,ACCS,ACMSD,ACOT12,ACOX1,ACSM2A,ACSS3,ACTA1,ACTG1,ACTG2,ACTN2,ADAM20,ADAM28,ADAM32,ADAM33,ADAM9,ADAMTS10,ADAMTS13,ADAMTS17,ADAMTSL2,ADAMTSL3,ADAMTSL4,ADAP1,ADAT3,ADCY1,ADCY10,ADCY8,ADD2,ADH6,ADHFE1,ADORA2A,ADORA2B,ADRA1A,ADRA1B,AFAP1L2,AFF3,AF…
Cancer of secretory structure	9.77e-14	NaN	A1CF,A2M,ABCA12,ABCA4,ABCA5,ABCA9,ABCB11,ABCB4,ABCC11,ABCC9,ABCG2,ABO,ACACB,ACAP1,ACOT1,ACOX1,ACOXL,ACSM1,ACSM5,ACSS3,ACTN2,ADAM15,ADAM32,ADAM33,ADAM9,ADAMTS10,ADAMTS13,ADAMTS17,ADAMTSL3,ADAP1,ADCY1,ADCY10,ADCY8,ADD2,ADH4,ADRA1A,ADRA1B,ADRA2B,AFAP1L2,AFF3,AFM,AFP,AGAP2,AGAP5 (includes others),AGBL2,AGER,AGT,AGTR1,AGXT2,AHNAK2,AIFM3,AJAP1,AK7,AKAP2,AKAP6,AKNA,AKR1B1,ALDH18A1,ALDH1L1,ALDH2,ALDH4A1,…
Autosomal dominant disease	1.13e-13	NaN	A2M,ABCA4,ABCA5,ABCC11,ABCC6,ABCC9,ACTA1,ACTG1,ACTG2,ACTN2,ACTN4,ADCY10,ADGRL3,ADH1B,ADRA1A,ADRA1B,ADRA2B,AFP,AGT,AGTR1,ALDH18A1,ALDH2,ANGPT1,ANGPT2,ANK2,ANKRD1,ANLN,ANO5,APOA1,APOA2,APOA5,APOB,APOE,AR,ASCL1,ATP1A2,ATP8B1,AURKA,AXIN2,BCL11A,BCL11B,BEST1,BEX2,BLK,BMP2,BMP4,BRCA1,BSCL2,BUB1B,C1R,C1S,C3,CACNA1D,CACNA1S,CACNB2,CALCR,CARD11,CASQ1,CASR,CAV1,CBS/CBSL,CCND1,CD2,CEBPA,CEL,CELF2,CFB,CFHR1,…
Skin squamous cell carcinoma	6.37e-13	NaN	ABCA4,ABCB11,ABCC9,ACSM5,ACSS3,ADAM28,ADAM32,ADAMTS10,ADAMTSL3,ADCY10,AFF3,AGTR1,AKAP2,AKAP6,ALAD,ALDH5A1,ANGPT1,ANKS1B,ANPEP,AOAH,APOB,ART4,ATP8B4,B3GALT5,B4GALNT3,BACH2,BEND3,BSN,BTLA,C3,C6,CACNA1D,CACNA1S,CARD11,CAV1,CBLN3,CCSER1,CD300LG,CD40LG,CD84,CDH19,CDH2,CDH23,CDHR2,CFHR4,CHRNA1,CILP,CIT,CLEC4D,CLEC4F,CMKLR1,CMPK2,COBLL1,COL11A2,COL19A1,COL21A1,CPN2,CPNE7,CR1,CR2,CREB3L1,CTLA4,CTNND2,CUB…
Inflammation of joint	8e-13	NaN	A1BG,ABCC2,ABCG2,ACOX2,ACSL1,ACTA1,ADAM15,ADAM9,ADAMTS10,ADAMTS13,ADAMTS17,ADCY8,ADORA2A,ADRA1A,ADRA1B,ADRA2B,AGER,AHSG,AIF1,AKR1D1,ALAS2,ALDOA,ALOX15,ALPK2,ALPL,AMPD1,ANG,APOA1,APOE,APOM,AQP9,AR,AREG,ARG1,ATP1B1,BHMT,BIRC5,BLK,BMP2,BMP4,BMP5,BTC,C19orf57,C1QA,C2,C3,C5,C5orf30,C9orf152,CACNA1D,CACNA1H,CACNA1S,CACNA2D3,CACNB2,CCDC7,CCL14,CCL15,CCL16,CCL17,CCL18,CCL19,CCL20,CCL22,CCL3L1,CCL5,CCNB1,…
Non-traumatic arthropathy	9.26e-13	NaN	A1BG,ABCC2,ABCG2,ACOX2,ACSL1,ACTA1,ADAM15,ADAM9,ADAMTS10,ADAMTS13,ADAMTS17,ADCY8,ADORA2A,ADRA1A,ADRA1B,ADRA2B,AGER,AHSG,AIF1,AKR1D1,ALAS2,ALDOA,ALOX15,ALPK2,ALPL,AMPD1,ANG,APOA1,APOE,APOM,AQP9,AR,AREG,ARG1,ATP1B1,BHMT,BIRC5,BMP2,BMP4,BMP5,BTC,C19orf57,C1QA,C2,C3,C5,C5orf30,C9orf152,CACNA1D,CACNA1H,CACNA1S,CACNA2D3,CACNB2,CCDC7,CCL14,CCL15,CCL16,CCL17,CCL18,CCL19,CCL20,CCL22,CCL3L1,CCL5,CCNB1,CCR2…
Non-melanoma skin cancer	1.43e-12	NaN	ABCA4,ABCB11,ABCC9,ACSM5,ACSS3,ADAM28,ADAM32,ADAMTS10,ADAMTSL3,ADCY10,AFF3,AGTR1,AKAP2,AKAP6,ALAD,ALDH5A1,ANGPT1,ANKS1B,ANPEP,AOAH,APOB,ART4,ATP8B4,B3GALT5,B4GALNT3,BACH2,BEND3,BSN,BTLA,C3,C6,CACNA1D,CACNA1S,CARD11,CAV1,CBLN3,CCSER1,CD300LG,CD40LG,CD84,CDH19,CDH2,CDH23,CDHR2,CFHR4,CHRNA1,CILP,CIT,CLEC4D,CLEC4F,CMKLR1,CMPK2,COBLL1,COL11A2,COL19A1,COL21A1,CPN2,CPNE7,CR1,CR2,CREB3L1,CTLA4,CTNND2,CUB…
Colorectal adenoma	2.46e-12	NaN	ABCG2,ADTRP,ANXA3,ASAP3,AXIN2,BACE2,BYSL,C1orf115,C2orf88,C5orf30,C9orf16,CA12,CCNB1,CCND1,CDH3,CDK1,CDKN2B,CEMIP,CES2,CFH,CFHR3,CLDN2,CLMN,CLU,CNNM4,DGAT2,DHRS11,DNASE1L3,DPT,EPHB3,ESR2,FOXQ1,GALNT6,GTF2IRD1,GUCA2B,HMGA1,HSD11B2,IL6R,ITGA6,ITM2C,JCHAIN,KCND3,LEPR,MMP7,MRPL17,MYBL2,NEBL,NFE2L3,NLE1,NR5A2,ODC1,PBLD,PCK1,PDK4,PHLDA1,PKIB,PLA2G2A,PPM1H,PRKCB,PRMT5,RDH5,RNF43,SELENOP,SINHCAF,SKA3,SLC…
Prostatic carcinoma	2.56e-12	NaN	A1CF,A2M,ABCA12,ABCA4,ABCB4,ABCC11,ABCC9,ABCG2,ABO,ACACB,ACOX1,ACSM1,ADAM32,ADAM9,ADAMTS13,ADCY1,ADCY10,ADCY8,ADD2,ADRA1A,ADRA1B,ADRA2B,AFAP1L2,AFM,AFP,AGAP2,AGAP5 (includes others),AGT,AK7,AKAP2,AKAP6,AKNA,AKR1B1,ALDH18A1,ALDH1L1,ALDH2,ALDH4A1,ALDOB,ALOX15,ALPK2,ALPK3,AMPD1,AMT,AMY2B,ANGPTL1,ANK2,ANKAR,ANKRD1,ANKRD13B,ANKRD20A4 (includes others),ANKRD35,ANKS1B,ANLN,ANXA10,ANXA2,AOAH,AOX1,APBA1,A…
Intestinal carcinoma	2.57e-12	NaN	A1BG,A2M,AADAT,AASS,ABCA10,ABCA12,ABCA4,ABCA5,ABCA6,ABCA8,ABCA9,ABCB11,ABCB4,ABCC11,ABCC2,ABCC6,ABCC9,ABCD2,ABCG5,ABHD11,ABI3,ACAA1,ACACB,ACADSB,ACAP1,ACAT1,ACCS,ACMSD,ACOT12,ACOX1,ACSM2A,ACTA1,ACTG1,ACTG2,ACTN2,ADAM20,ADAM28,ADAM32,ADAM33,ADAM9,ADAMTS10,ADAMTS13,ADAMTS17,ADAMTSL2,ADAMTSL3,ADAMTSL4,ADAP1,ADCY1,ADCY10,ADCY8,ADD2,ADH6,ADHFE1,ADORA2A,ADORA2B,ADRA1A,ADRA1B,AFAP1L2,AFF3,AFM,AFP,AGAP2,…
Ovarian cancer	3.22e-12	NaN	A1BG,AASS,ABAT,ABCA10,ABCA12,ABCA4,ABCA8,ABCC11,ACAD11,ACTG1,ADAMTS10,ADAMTSL3,ADCY10,ADD2,ADGRB3,ADORA2A,AFF3,AFM,AGAP2,AGK,AIF1,AK7,AKAP2,AKAP6,AKNA,AKR1B1,AKR1C1/AKR1C2,ALDH1A1,ALDH1L1,ALDH5A1,ANG,ANGPT1,ANGPT2,ANKRD24,ANKRD55,ANLN,ANPEP,ANXA10,ANXA8/ANXA8L1,APCDD1,APOA1,APOB,APOE,APOH,AR,ARHGAP39,ARHGEF26,ASB4,ATAD3A,ATF7IP2,ATG2B,ATP6V1B1,ATP8B1,ATP8B2,ATP8B4,ATRN,AURKB,AXIN2,AZGP1,BCL10,BCL…
Gonadal tumor	3.5e-12	NaN	A1BG,AASS,ABAT,ABCA10,ABCA12,ABCA4,ABCA8,ABCC11,ABCG2,ACAD11,ACTG1,ADAMTS10,ADAMTSL3,ADCY10,ADD2,ADGRB3,ADORA2A,ADORA2B,AFF3,AFM,AFP,AGAP2,AGK,AIF1,AK7,AKAP2,AKAP6,AKNA,AKR1B1,AKR1C1/AKR1C2,ALDH1A1,ALDH1L1,ALDH5A1,ALYREF,ANG,ANGPT1,ANGPT2,ANKRD24,ANKRD55,ANLN,ANPEP,ANXA10,ANXA8/ANXA8L1,APCDD1,APOA1,APOB,APOE,APOH,AR,ARHGAP39,ARHGEF26,ASB4,ATAD3A,ATF7IP2,ATG2B,ATP6V1B1,ATP8B1,ATP8B2,ATP8B4,ATRN,AU…
Ovarian Cancer and Tumors	5.17e-12	NaN	A1BG,AASS,ABAT,ABCA10,ABCA12,ABCA4,ABCA8,ABCC11,ABCG2,ACAD11,ACTG1,ADAMTS10,ADAMTSL3,ADCY10,ADD2,ADGRB3,ADORA2A,AFF3,AFM,AGAP2,AGK,AIF1,AK7,AKAP2,AKAP6,AKNA,AKR1B1,AKR1C1/AKR1C2,ALDH1A1,ALDH1L1,ALDH5A1,ALYREF,ANG,ANGPT1,ANGPT2,ANKRD24,ANKRD55,ANLN,ANPEP,ANXA10,ANXA8/ANXA8L1,APCDD1,APOA1,APOB,APOE,APOH,AR,ARHGAP39,ARHGEF26,ASB4,ATAD3A,ATF7IP2,ATG2B,ATP6V1B1,ATP8B1,ATP8B2,ATP8B4,ATRN,AURKB,AXIN2,AZ…
Large intestine carcinoma	6.03e-12	NaN	A1BG,A2M,AADAT,AASS,ABCA10,ABCA12,ABCA4,ABCA5,ABCA6,ABCA8,ABCA9,ABCB11,ABCB4,ABCC11,ABCC2,ABCC6,ABCC9,ABCD2,ABCG5,ABHD11,ABI3,ACAA1,ACACB,ACADSB,ACAP1,ACAT1,ACCS,ACMSD,ACOT12,ACOX1,ACSM2A,ACTA1,ACTG1,ACTG2,ACTN2,ADAM20,ADAM28,ADAM32,ADAM33,ADAM9,ADAMTS10,ADAMTS13,ADAMTS17,ADAMTSL2,ADAMTSL3,ADAMTSL4,ADAP1,ADCY1,ADCY10,ADCY8,ADD2,ADH6,ADHFE1,ADORA2A,ADORA2B,ADRA1A,ADRA1B,AFAP1L2,AFF3,AFM,AFP,AGAP2,…
Liver carcinoma	8.85e-12	NaN	A1CF,AADAC,AASS,ABCA10,ABCA12,ABCA4,ABCA5,ABCA8,ABCA9,ABCB11,ABCB4,ABCC11,ABCC2,ABCC6,ABCC9,ABCD2,ABCG8,ABI3,ACAA1,ACACB,ACADSB,ACOT1,ACOX1,ACSL1,ACTG1,ACTG2,ADAM15,ADAM28,ADAM32,ADAM33,ADAM9,ADAMTS10,ADAMTS13,ADAMTS17,ADAMTSL3,ADAMTSL4,ADCY1,ADCY10,ADCY8,ADGRG1,ADH1A,ADH1B,ADRA1A,ADTRP,AFF3,AFP,AGER,AGK,AGRN,AGT,AGXT2,AHNAK2,AIFM3,AIG1,AJAP1,AKAP6,AKNA,AKR1B10,AKR1C1/AKR1C2,AKR1D1,ALAD,ALDH2,ALD…
Colorectal carcinoma	1.03e-11	NaN	AASS,ABCA10,ABCA12,ABCA4,ABCA5,ABCA6,ABCA8,ABCA9,ABCC11,ABCC6,ABCG5,ABI3,ACACB,ACAT1,ACMSD,ACOT12,ACOX1,ACTA1,ACTG1,ACTN2,ADAM28,ADAM32,ADAMTS10,ADAMTS13,ADAMTSL4,ADCY10,ADCY8,ADD2,ADORA2A,ADRA1A,ADRA1B,AFAP1L2,AFF3,AFM,AGAP5 (includes others),AGBL2,AGMO,AGRN,AHNAK2,AHSA2P,AHSG,AJAP1,AKAP2,AKAP6,AKR1B1,AKR1B10,AKR1C1/AKR1C2,ALAS2,ALDH1A1,ALDH1B1,ALDH1L1,ALDH2,ALDH6A1,ALDH8A1,ALDOA,ALOX15,ALPK2,AL…
Cerebrovascular dysfunction	1.95e-11	NaN	ABCG2,ADA2,ADCY8,ADRA1A,ADRA1B,ADRA2B,AGER,AGTR1,ANGPT1,ANGPT2,APOA1,APOB,APOH,AR,ATP1A1,ATP1A2,ATP1A4,BCHE,CA12,CA14,CA3,CA5A,CA9,CACNA1D,CACNA1S,CACNB2,CACNB3,CCR5,CHRM2,CHRNA1,CHRNA4,CYP2C19,CYP2D6,DDC,DLG2,EDN1,ETS2,F10,F13A1,F2,F5,FABP3,GABRA5,GABRB3,GABRE,GABRG3,GABRR2,GRIN2D,GRIN3A,HDAC9,HTR2B,IL6,ITGA2B,KCNA5,KCNH2,KCNQ1,KLF4,LCN2,LPA,LY96,MUT,NNMT,NOS2,NPC1L1,NPL,NR3C1,NTRK2,P2RY1,P2RY12…
Discomfort	2.02e-11	NaN	ABAT,ADORA2A,ADORA2B,ADRA1A,ADRA1B,ADRA2B,AGTR1,AKR1B1,ALDH5A1,AMY2B,AR,ARHGAP9,ATP1A2,BCL2,CA12,CA14,CA3,CA5A,CA9,CACNA1D,CACNA1H,CACNA1S,CACNA2D3,CACNB2,CACNB3,CALCR,CCL5,CD247,CHRM2,CHRNA1,CHRNA4,CLU,CX3CR1,CXCL12,CYP1A2,CYP2B6,CYP2C8,CYP2D6,CYSLTR1,CYSLTR2,ESR1,ESR2,F10,F2,F2RL1,FHL1,FLT3,GABRA5,GABRB3,GABRE,GABRG3,GABRR2,GRIN2D,GRIN3A,GUCY1A1,HIST1H2AE,HIST1H2AG,HSP90AA1,HSP90AB1,HTR2B,HYAL1…
Tumorigenesis of genital tumor	2.19e-11	NaN	A1CF,AASS,ABCA10,ABCA12,ABCA4,ABCA5,ABCA6,ABCA8,ABCA9,ABCB4,ABCC11,ABCC2,ABCC6,ABCC9,ABCG5,ACACB,ACAD11,ACADSB,ACOT12,ACOX1,ACSL1,ACSM1,ACSM2B,ACTG1,ACTN4,ADAM9,ADAMTS10,ADAMTSL3,ADAMTSL4,ADCY1,ADCY10,ADD2,ADI1,ADORA2A,ADRA1A,AFAP1L2,AFF3,AGAP2,AGAP5 (includes others),AGK,AGMO,AGT,AGXT2,AHNAK2,AIF1,AJAP1,AK7,AKAP2,AKAP6,AKNA,AKR1B1,AKR1C1/AKR1C2,ALDH1B1,ALDH1L1,ALDH4A1,ALDH8A1,ALDOB,ALPK2,ALPK3,A…
Skin carcinoma	7.36e-11	NaN	AADAT,ABCA12,ABCA4,ABCB11,ABCC9,ACSM5,ACSS3,ADAM28,ADAM32,ADAMTS10,ADAMTSL3,ADAMTSL4,ADCY10,ADD2,AFF3,AGTR1,AGXT2,AKAP2,AKAP6,AKR1C1/AKR1C2,ALAD,ALDH5A1,ANGPT1,ANK2,ANKS1B,ANO5,ANPEP,AOAH,APOA4,APOB,AQP7,ARHGAP15,ART4,ASGR2,ASPHD1,ATP1A2,ATP8B4,B3GALT5,B4GALNT3,BACH2,BCL11B,BEND3,BEST1,BRCA1,BSN,BTLA,BTNL8,C3,C3P1,C4orf46,C6,C7,C9,CACNA1D,CACNA1H,CACNA1S,CAMP,CARD11,CAV1,CBLN3,CCL27,CCR7,CCSER1,C…
Upper gastrointestinal tract cancer	7.37e-11	NaN	A1BG,A2M,ABCA10,ABCA12,ABCA4,ABCA8,ABCB4,ABCC9,ACMSD,ACOT12,ACSS3,ACTN2,ADAM15,ADAM28,ADAM9,ADAMTS10,ADAMTS13,ADAMTSL3,ADAMTSL4,ADAT3,ADCY8,ADHFE1,ADRA1A,ADRA2B,AGAP2,AGRN,AGT,AGTR1,AGXT,AHNAK2,AHSG,AJAP1,AKAP2,AKAP6,ALDH2,AMHR2,AMPH,AMT,AMY2B,ANGPT1,ANGPT2,ANKRD44,ANKRD6,ANLN,AOX1,APBA1,APBB1,APOB,APOE,AQP7,AR,AREG,ARFGEF3,ARHGAP28,ARID4A,ASAP3,ASCL1,ASIC3,ASXL3,ATF7IP2,ATP2B2,ATP6V1B1,ATRNL1,AU…
Intestinal adenocarcinoma	8.75e-11	NaN	A1BG,A2M,AADAT,AASS,ABCA10,ABCA12,ABCA4,ABCA5,ABCA6,ABCA8,ABCA9,ABCB11,ABCB4,ABCC11,ABCC2,ABCC6,ABCC9,ABCD2,ABCG5,ABHD11,ABI3,ACAA1,ACACB,ACADSB,ACAP1,ACAT1,ACCS,ACMSD,ACOT12,ACOX1,ACSM2A,ACTA1,ACTG1,ACTG2,ACTN2,ADAM20,ADAM28,ADAM32,ADAM33,ADAM9,ADAMTS10,ADAMTS13,ADAMTS17,ADAMTSL2,ADAMTSL3,ADAMTSL4,ADAP1,ADCY1,ADCY10,ADCY8,ADD2,ADH6,ADHFE1,ADORA2A,ADORA2B,ADRA1A,ADRA1B,AFAP1L2,AFF3,AFM,AFP,AGAP2,…
Large intestine adenocarcinoma	1.08e-10	NaN	A1BG,A2M,AADAT,AASS,ABCA10,ABCA12,ABCA4,ABCA5,ABCA6,ABCA8,ABCA9,ABCB11,ABCB4,ABCC11,ABCC2,ABCC6,ABCC9,ABCD2,ABCG5,ABHD11,ABI3,ACAA1,ACACB,ACADSB,ACAP1,ACAT1,ACCS,ACMSD,ACOT12,ACOX1,ACSM2A,ACTA1,ACTG1,ACTG2,ACTN2,ADAM20,ADAM28,ADAM32,ADAM33,ADAM9,ADAMTS10,ADAMTS13,ADAMTS17,ADAMTSL2,ADAMTSL3,ADAMTSL4,ADAP1,ADCY1,ADCY10,ADCY8,ADD2,ADH6,ADHFE1,ADORA2A,ADORA2B,ADRA1A,ADRA1B,AFAP1L2,AFF3,AFM,AFP,AGAP2,…
Diabetic complication	1.1e-10	NaN	ADORA2B,ADRA1A,ADRA1B,ADRA2B,AGT,AGTR1,AIF1,AKR1B1,AMBP,APOE,AR,BMP2,CA12,CA14,CA3,CA5A,CA9,CACNA1D,CACNA1S,CACNA2D3,CACNB2,CAPN3,CCL16,CCND1,CD24,CDS1,CHI3L1,CHRM2,CLEC3B,CLU,COL10A1,COL11A2,COL13A1,COL14A1,COL18A1,COL19A1,COL21A1,COL27A1,COL8A1,CR1,CRHBP,CYP2D6,CYP4F2,DPEP1,ELMO1,ENPEP,F10,F3,FABP1,FBP1,FXYD2,GMDS,GPLD1,GRIN2D,GRIN3A,HGF,HPGD,HPN,HYAL1,IGFBP2,IL6,IMPDH1,IMPDH2,INSL3,KCNA5,KCNH2…
Familial cardiovascular disease	1.6e-10	NaN	ABCC6,ABCC9,ACTA1,ACTN2,ADA2,ADAMTS13,ADRA1A,ADRA1B,ADRA2B,AGK,AGT,ALPK3,ANK2,ANKRD1,APOA1,APOA2,APOA5,APOB,APOC2,APOC3,APOE,C3,CACNA1D,CACNA1S,CACNB2,CAV1,CBS/CBSL,CCBE1,CCND1,CD96,CETP,CFAP53,CFB,CFH,CFI,CHRM2,COL11A2,CORIN,CSF2RA,CSRP3,CTNNA3,DDX58,DES,DMD,DSC2,DSG2,DTNA,EDN1,ENPP1,EPHX1,EPHX2,F12,F2,F5,FAT4,FBN2,FHL1,FHL2,FLNC,FRMD4B,FZD4,GATA4,GATA5,GDF2,GHR,GJA5,GP1BA,GPD1,GPD1L,GUCY1A1,HAB…
Immunodeficiency	2.11e-10	NaN	ACOT1,ADRA1A,ADRA1B,ADRA2B,BCL10,BCL11B,C19orf57,C1QA,C1QB,C1S,C2,C3,C5,C6,C7,C8A,C8B,C9,CARD11,CD19,CD247,CD3D,CD3E,CD3G,CD40LG,CD79A,CD79B,CDCA7,CFB,CFH,CFHR5,CFI,CFP,COCH,CPN1,CR2,CTLA4,CYBB,DOCK2,DSG1,ESR1,ESR2,F2,FASLG,FCGR1B,FCN3,FGA,FGB,FGG,FLT3,FOXP3,GHR,GIPR,HELLS,HTR2B,ICOS,IFI27,IGLL1/IGLL5,IKZF1,IL12RB1,IL21,IL21R,IL7R,IMPDH1,IMPDH2,INSL3,ISG15,JAK3,KCNN3,LTF,MASP2,MLPH,MS4A1,MX1,MYO5…
Non-small cell lung cancer	2.65e-10	NaN	ABCA12,ABCC2,ACOT1,ACOT2,ACOX1,ACTN2,ADAM9,ADCY10,ADGRB3,ADH1C,ADORA2A,ADORA2B,ADRA1B,AFM,AGK,AGRN,AHNAK2,AKR1B10,ALDH1B1,ALDH1L1,ALDOA,ALPK2,ANGPT1,ANK2,ANKS1B,ANO2,ANXA2,ANXA3,APOB,APOBEC3B,APOC1,AR,AREG,ARHGEF6,ARID3C,ASXL3,ATP1A1,ATP1A2,ATP1B1,ATP2B2,ATP8B2,ATRNL1,AURKA,AURKB,AXIN2,B3GAT1,BACE2,BCHE,BCL11A,BCL2,BIRC5,BLK,BMX,BRCA1,BSN,C11orf52,C1orf159,C2orf16,C3orf52,C3orf67,C7,C8B,C9,CA9,CA…
Squamous-cell carcinoma	3.47e-10	NaN	A1BG,ABCA12,ABCA4,ABCA6,ABCB11,ABCB4,ABCC9,ABI3,ABO,ACAD11,ACADL,ACOT1,ACOT2,ACOX1,ACOXL,ACSM5,ACSS3,ACTN2,ACTN4,ADAM28,ADAM32,ADAM9,ADAMTS10,ADAMTS13,ADAMTS17,ADAMTSL3,ADCY1,ADCY10,ADCY8,ADGRB3,ADH1B,AFF3,AGAP2,AGAP5 (includes others),AGT,AGTR1,AGXT,AHNAK2,AKAP2,AKAP6,AKNA,ALAD,ALDH1L1,ALDH5A1,ALDOB,ALPK2,AMPD1,AMPH,ANGPT1,ANGPTL6,ANKRD20A4 (includes others),ANKRD35,ANKRD53,ANKS1B,ANKS6,ANLN,ANO…
Prostatic adenocarcinoma	3.95e-10	NaN	A1CF,A2M,ABCA12,ABCA4,ABCB4,ABCC11,ABCC9,ABCG2,ABO,ACACB,ACOX1,ACSM1,ADAM32,ADAM9,ADAMTS13,ADCY1,ADCY10,ADCY8,ADD2,ADRA1A,ADRA1B,ADRA2B,AFAP1L2,AFM,AFP,AGAP2,AGAP5 (includes others),AGT,AK7,AKAP2,AKAP6,AKNA,AKR1B1,ALDH18A1,ALDH1L1,ALDH2,ALDH4A1,ALDOB,ALOX15,ALPK2,ALPK3,AMPD1,AMT,AMY2B,ANGPTL1,ANK2,ANKAR,ANKRD1,ANKRD13B,ANKRD20A4 (includes others),ANKRD35,ANKS1B,ANLN,ANXA10,AOAH,AOX1,APBA1,APBB1,A…
Leukemia	5.17e-10	NaN	ABCA10,ABCA9,ABCB11,ABCB4,ABCC11,ABCG2,ABCG5,ABCG8,ACAD11,ACER2,ACTG1,ACTN2,ADCY1,ADD2,ADGRB1,ADORA2A,ADRA1A,ADRA1B,AGAP5 (includes others),AHNAK2,AIG1,AKAP2,ALDH1A1,ALDH4A1,ALPK3,ANGPT1,ANK2,ANKRD20A4 (includes others),ANKRD53,ANKS1B,ANO5,ANPEP,APCDD1,APOB,APOBEC3D,AQP7,ARHGAP9,ARL9,ASAP3,ASRGL1,ASXL3,ATG4D,ATP1A4,ATP1B1,ATP8B1,ATRNL1,AURKA,AURKB,AXIN2,B3GALT1,B3GAT1,BAAT,BACH2,BAG1,BCHE,BCL10,B…
Colorectal adenocarcinoma	5.64e-10	NaN	AASS,ABCA10,ABCA12,ABCA4,ABCA5,ABCA6,ABCA8,ABCA9,ABCC11,ABCC6,ABCG5,ABI3,ACACB,ACAT1,ACMSD,ACOT12,ACTA1,ACTG1,ACTN2,ADAM28,ADAM32,ADAMTS10,ADAMTS13,ADAMTSL4,ADCY10,ADCY8,ADD2,ADORA2A,ADRA1A,ADRA1B,AFAP1L2,AFF3,AFM,AGAP5 (includes others),AGBL2,AGMO,AGRN,AHNAK2,AHSA2P,AHSG,AJAP1,AKAP2,AKAP6,AKR1B1,AKR1B10,AKR1C1/AKR1C2,ALAS2,ALDH1A1,ALDH1B1,ALDH1L1,ALDH2,ALDH6A1,ALDH8A1,ALDOA,ALOX15,ALPK2,ALPK3,AL…
Stroke	6.61e-10	NaN	ADCY8,ADRA1A,ADRA1B,ADRA2B,AGTR1,APOB,APOH,AR,CA12,CA14,CA3,CA5A,CA9,CACNA1D,CACNA1S,CACNB2,CCR5,CHRM2,CHRNA1,CHRNA4,CYP2C19,CYP2D6,DDC,DLG2,EDN1,ETS2,F10,F13A1,F2,F5,FABP3,GABRA5,GABRB3,GABRE,GABRG3,GABRR2,GRIN2D,GRIN3A,HDAC9,HTR2B,ITGA2B,KCNA5,KCNH2,KCNQ1,LCN2,LY96,MUT,NNMT,NPC1L1,NPL,NR3C1,NTRK2,P2RY1,P2RY12,PDE11A,PDE3A,PDE4B,PDE5A,PDE7B,PLG,PRKCB,PRKCH,PUM3,QPRT,SCN1B,SCN9A,SERPINC1,SIGMAR1,…
Uterine corpus cancer	6.88e-10	NaN	AASS,ABCA10,ABCA12,ABCA4,ABCA5,ABCA6,ABCA8,ABCA9,ABCB4,ABCC11,ABCC2,ABCC6,ABCC9,ABCG5,ACACB,ACADSB,ACOT12,ACOX1,ACSL1,ACSM1,ACSM2B,ACTN4,ADAM9,ADAMTSL4,ADCY1,ADCY10,ADRA1A,AFAP1L2,AGAP5 (includes others),AGK,AGMO,AGT,AGXT2,AHNAK2,AJAP1,AK7,AKAP6,AKR1C1/AKR1C2,ALDH1B1,ALDH1L1,ALDH4A1,ALDH8A1,ALDOB,ALPK2,ALPK3,AMPD1,AMPH,ANGPT2,ANGPTL3,ANK2,ANKDD1A,ANKRD18A,ANKRD44,ANKS1B,ANO2,ANO5,AOC2,APOB,AQP9,A…
Overweight disorder	7.03e-10	NaN	ABAT,ADORA2A,ADRA1A,ADRA1B,ADRA2B,AGT,AGTR1,ALDH5A1,AMY2B,ANG,ANGPT1,ANGPT2,APOC3,AQP7,AR,ASAH2,C3orf67,CA12,CA14,CA3,CA5A,CA9,CACNA1D,CACNA1H,CACNA1S,CACNB2,CACNB3,CCL5,CCR5,CDCA8,CENPA,CHRM2,CHRNA1,CHRNA4,CXCL11,CYP2E1,ENPP1,EPHX2,ESR1,ESR2,F10,F2,F2RL1,FFAR4,FOXM1,GABRA5,GABRB3,GABRE,GABRG3,GABRR2,GHR,GHRL,GIPR,GPER1,GPT,GRIN2D,GRIN3A,HHEX,HSD11B1,HTR2B,IL1RAP,IL6,IL6R,IL6ST,KIF20A,LBP,LEP,LEP…
Endometrial adenocarcinoma	8.23e-10	NaN	AASS,ABCA10,ABCA12,ABCA4,ABCA5,ABCA6,ABCA8,ABCA9,ABCB4,ABCC11,ABCC2,ABCC6,ABCC9,ABCG5,ACACB,ACADSB,ACOT12,ACOX1,ACSL1,ACSM1,ACSM2B,ACTN4,ADAM9,ADAMTSL4,ADCY1,ADCY10,ADRA1A,AFAP1L2,AGAP5 (includes others),AGK,AGMO,AGT,AGXT2,AHNAK2,AJAP1,AK7,AKAP6,AKR1C1/AKR1C2,ALDH1B1,ALDH1L1,ALDH4A1,ALDH8A1,ALDOB,ALPK2,ALPK3,AMPD1,AMPH,ANGPT2,ANGPTL3,ANK2,ANKDD1A,ANKRD18A,ANKRD44,ANKS1B,ANO2,ANO5,AOC2,APOB,AQP9,A…
Colon carcinoma	8.38e-10	NaN	ABCA10,ABCA12,ABCA4,ABCA5,ABCA6,ABCA8,ABCA9,ABCC11,ABCC6,ABCG5,ABI3,ACACB,ACAT1,ACMSD,ACOT12,ACOX1,ACTA1,ACTG1,ACTN2,ADAM28,ADAM32,ADAMTS10,ADAMTS13,ADAMTSL4,ADCY10,ADCY8,ADD2,ADORA2A,ADRA1A,ADRA1B,AFAP1L2,AFF3,AFM,AGAP5 (includes others),AGBL2,AGMO,AGRN,AHNAK2,AHSA2P,AHSG,AJAP1,AKAP2,AKAP6,AKR1B1,AKR1B10,ALAS2,ALDH1B1,ALDH1L1,ALDH2,ALDH6A1,ALDH8A1,ALDOA,ALOX15,ALPK2,ALPK3,ALPL,AMPD1,ANGPT1,ANGPT…
Liquid tumor	1.05e-09	NaN	ABCA10,ABCA12,ABCA9,ABCB11,ABCB4,ABCC11,ABCG2,ABCG5,ABCG8,ACAD11,ACER2,ACTG1,ACTN2,ADAMTS17,ADCY1,ADD2,ADGRB1,ADORA2A,ADRA1A,ADRA1B,AGAP5 (includes others),AHNAK2,AIG1,AKAP2,ALDH1A1,ALDH4A1,ALPK3,ANGPT1,ANK2,ANKRD20A4 (includes others),ANKRD53,ANKS1B,ANO5,ANPEP,APCDD1,APOB,APOBEC3D,AQP7,ARHGAP9,ARL9,ASAP3,ASRGL1,ASXL3,ATG4D,ATP1A4,ATP1B1,ATP8B1,ATRNL1,AURKA,AURKB,AXIN2,B3GALT1,B3GAT1,B4GALNT3,BAA…
Obesity	1.29e-09	NaN	ABAT,ADORA2A,ADRA1A,ADRA1B,ADRA2B,AGT,AGTR1,ALDH5A1,AMY2B,ANG,ANGPT1,ANGPT2,APOC3,AQP7,AR,ASAH2,C3orf67,CA12,CA14,CA3,CA5A,CA9,CACNA1D,CACNA1H,CACNA1S,CACNB2,CACNB3,CCL5,CCR5,CDCA8,CENPA,CHRM2,CHRNA1,CHRNA4,CXCL11,CYP2E1,ENPP1,EPHX2,ESR1,ESR2,F10,F2,F2RL1,FFAR4,FOXM1,GABRA5,GABRB3,GABRE,GABRG3,GABRR2,GHR,GHRL,GIPR,GPER1,GPT,GRIN2D,GRIN3A,HHEX,HSD11B1,HTR2B,IL1RAP,IL6,IL6R,IL6ST,KIF20A,LBP,LEP,LEP…
Endometrial carcinoma	1.38e-09	NaN	A1CF,AASS,ABCA10,ABCA12,ABCA4,ABCA5,ABCA6,ABCA8,ABCA9,ABCB4,ABCC11,ABCC2,ABCC6,ABCC9,ABCG5,ACACB,ACADSB,ACOT12,ACOX1,ACSL1,ACSM1,ACSM2B,ACTN4,ADAM9,ADAMTSL4,ADCY1,ADCY10,ADI1,ADRA1A,AFAP1L2,AGAP5 (includes others),AGK,AGMO,AGT,AGXT2,AHNAK2,AJAP1,AK7,AKAP6,AKR1C1/AKR1C2,ALDH1B1,ALDH1L1,ALDH4A1,ALDH8A1,ALDOB,ALPK2,ALPK3,AMPD1,AMPH,ANGPT2,ANGPTL3,ANK2,ANKDD1A,ANKRD18A,ANKRD44,ANKS1B,ANO2,ANO5,AOC2,A…
Gastroesophageal cancer	1.73e-09	NaN	A2M,ABCA10,ABCA12,ABCA4,ABCA8,ABCC9,ACMSD,ACOT12,ACSS3,ACTN2,ADAM15,ADAM28,ADAM9,ADAMTS10,ADAMTSL4,ADAT3,ADCY8,ADHFE1,ADRA1A,ADRA2B,AGAP2,AGRN,AGTR1,AGXT,AHNAK2,AJAP1,AKAP2,AKAP6,ALDH2,AMHR2,AMPH,AMT,AMY2B,ANGPT1,ANGPT2,ANKRD44,ANKRD6,ANLN,AOX1,APBA1,APBB1,APOB,APOE,AQP7,AR,AREG,ARHGAP28,ARID4A,ASCL1,ASIC3,ASXL3,ATP2B2,ATP6V1B1,AXIN2,AZGP1,BACE2,BATF,BCHE,BCL10,BCL2,BEX2,BIRC5,BLK,BMP10,BRCA1,BSN…
Uterine endometrioid carcinoma	2.27e-09	NaN	AASS,ABCA10,ABCA12,ABCA4,ABCA5,ABCA6,ABCA8,ABCA9,ABCB4,ABCC11,ABCC2,ABCC6,ABCC9,ABCG5,ACACB,ACADSB,ACOT12,ACOX1,ACSL1,ACSM1,ACSM2B,ACTN4,ADAM9,ADAMTSL4,ADCY1,ADCY10,ADRA1A,AFAP1L2,AGAP5 (includes others),AGK,AGMO,AGT,AGXT2,AHNAK2,AJAP1,AK7,AKAP6,AKR1C1/AKR1C2,ALDH1B1,ALDH1L1,ALDH4A1,ALDH8A1,ALDOB,ALPK2,ALPK3,AMPD1,AMPH,ANGPT2,ANGPTL3,ANK2,ANKDD1A,ANKRD18A,ANKRD44,ANKS1B,ANO2,ANO5,AOC2,APOB,AQP9,A…
Rheumatoid arthritis	2.43e-09	NaN	A1BG,ACOX2,ACSL1,ACTA1,ADAM15,ADAM9,ADCY8,ADORA2A,ADRA2B,AGER,AHSG,AIF1,AKR1D1,ALAS2,ALDOA,ALOX15,ALPK2,ALPL,AMPD1,ANG,APOA1,APOE,APOM,AQP9,AREG,ARG1,ATP1B1,BHMT,BIRC5,BMP4,BMP5,BTC,C19orf57,C1QA,C2,C3,C5,C5orf30,C9orf152,CACNA1D,CACNA1H,CACNA1S,CACNB2,CCDC7,CCL14,CCL15,CCL16,CCL17,CCL18,CCL19,CCL20,CCL22,CCL3L1,CCL5,CCNB1,CCR2,CCR4,CCR5,CCR7,CCRL2,CD24,CD244,CD247,CD28,CD3D,CD6,CD69,CD70,CD79A,C…
Inborn error of amino acid metabolism	2.49e-09	NaN	AASS,ABAT,ACAT1,ADRA1A,ADRA1B,ADRA2B,ALDH4A1,ALDH5A1,ALDH6A1,AMT,ARG1,ASPA,BTD,CA5A,CBS/CBSL,CD320,CPS1,CTH,CUBN,DBH,DDC,DNAJC12,DTNA,ETFDH,FAH,FMO3,FTCD,GAMT,GATM,GLDC,HGD,HMGCL,HPD,KYNU,LOC102724788/PRODH,MLPH,MUT,MYO5A,NAT2,OTC,PAH,PKHD1,SARDH,SLC3A1,SLC6A19,SLC6A20,SLC6A8,SLC7A9,SUGCT,TAT,UROC1
Hyperlipoproteinemia	2.72e-09	NaN	ABCG5,ABCG8,AGTR1,APOA1,APOA2,APOA5,APOB,APOC2,APOC3,APOE,AR,CACNA1D,CACNA1S,CACNB2,CD40LG,CETP,CKM,EPHX2,ESR1,F2,F7,FRMD4B,GABRA5,GHR,IL6,IMPDH1,IMPDH2,ITIH4,LBP,LIPC,LMF1,LPA,MTTP,NNMT,NPC1L1,NR3C1,QPRT,SELP,STAP1,TNNT2
Gastroesophageal adenocarcinoma	3.31e-09	NaN	A2M,ABCA10,ABCA12,ABCA8,ABCC9,ACMSD,ACOT12,ACSS3,ACTN2,ADAM28,ADAMTS10,ADAMTSL4,ADAT3,ADCY8,ADHFE1,ADRA1A,AGRN,AGTR1,AGXT,AHNAK2,AJAP1,AKAP2,AKAP6,AMHR2,AMPH,AMT,AMY2B,ANGPT2,ANKRD44,ANKRD6,ANLN,AOX1,APBA1,APBB1,APOB,AR,AREG,ARHGAP28,ARID4A,ASCL1,ASXL3,ATP2B2,ATP6V1B1,AXIN2,AZGP1,BACE2,BATF,BCHE,BCL2,BEX2,BLK,BMP10,BSN,BTBD11,C11orf54,C11orf70,C1orf116,C1QL1,C1QTNF3,C3,C6,C8B,CACNA1D,CACNA1H,CARD…
Primary cardiomyopathy	3.32e-09	NaN	ABCC9,ACTA1,ACTN2,AGK,ALPK3,ANK2,ANKRD1,APOA1,ATP1B1,C19orf57,C3orf52,C3orf67,CACNB2,CHRM2,CSRP3,CTNNA3,DES,DMD,DSC2,DSG2,DTNA,FHL1,FHL2,FLNC,FOXP3,FRMD4B,GIPR,GJA5,GPD1L,GPER1,IL6,KCNA5,KCNH2,KCNJ8,KCNQ1,LDB3,LMNA,MYBPC2,MYH7,MYL2,MYL3,MYOM1,MYPN,NEBL,NTRK2,PFKM,PKP2,PTGDS,RORC,SCN1B,SCN3B,SCN4B,SGCD,SNCAIP,SYNE1,TCAP,TNNT2,TPM1,TTN,TTR,TVP23A,VDAC1,VDAC2,ZC3HAV1L,ZNF214,ZNF280B
Endometrioid carcinoma	3.4e-09	NaN	AASS,ABCA10,ABCA12,ABCA4,ABCA5,ABCA6,ABCA8,ABCA9,ABCB4,ABCC11,ABCC2,ABCC6,ABCC9,ABCG5,ACACB,ACAD11,ACADSB,ACOT12,ACOX1,ACSL1,ACSM1,ACSM2B,ACTG1,ACTN4,ADAM9,ADAMTS10,ADAMTSL4,ADCY1,ADCY10,ADD2,ADRA1A,AFAP1L2,AFF3,AGAP2,AGAP5 (includes others),AGK,AGMO,AGT,AGXT2,AHNAK2,AIF1,AJAP1,AK7,AKAP6,AKNA,AKR1B1,AKR1C1/AKR1C2,ALDH1B1,ALDH1L1,ALDH4A1,ALDH8A1,ALDOB,ALPK2,ALPK3,AMPD1,AMPH,ANGPT2,ANGPTL3,ANK2,ANK…
Osteoarthritis	3.7e-09	NaN	ADAM15,ADAM9,ADAMTS10,ADAMTS13,ADAMTS17,ADRA1A,ADRA1B,ADRA2B,ALOX15,AR,BMP2,BMP4,BMP5,C3,CACNA1D,CACNA1H,CACNA1S,CACNA2D3,CACNB2,CEMIP,CLU,CTLA4,CYTL1,ELF3,EPAS1,F10,FCN2,FCN3,FGF2,GABRA5,GABRB3,GABRE,GABRG3,GABRR2,HGF,HYAL1,IL11RA,IL18,IL21R,IL6,MBL2,MMP1,MMP10,MMP12,MMP21,MMP28,MMP7,NFATC1,NGF,NR3C1,NR4A1,OPRL1,PDCD1,PDGFD,PLA2G2A,PLG,PTGDS,PTGER1,RARRES2,SCN1B,SCN3A,SCN3B,SCN4B,SCN7A,SCN8A,SCN…
Arrhythmia	3.97e-09	NaN	ABCC9,ACTN2,ADORA2A,ADORA2B,ADRA1A,ADRA1B,ADRA2B,AGTR1,AMY2B,ANK2,ANKRD1,AR,ASB2,ATP1A1,ATP1A2,ATP1A4,ATP1B1,CACNA1D,CACNA1S,CACNB2,CACNB3,CHRM2,CIT,CTNNA3,CYP2D6,DES,DMD,DSC2,DSG2,F10,F2,FHL2,FRMD4B,GJA5,GPD1L,IL6,KCNA5,KCND3,KCNH2,KCNJ5,KCNJ8,KCNMA1,KCNQ1,LMNA,MAOB,MMP1,MPO,MYBPC2,MYH7,MYOM1,NPC1L1,NR3C1,NTRK2,P2RY1,P2RY12,PIK3CG,PKP2,SCN1B,SCN3B,SCN4B,SCN9A,SERINC2,SERPINC1,SGO1,SLC8A1,TFPI,TP…
Hypercholesterolemia	5.58e-09	NaN	ABCG5,ABCG8,AGTR1,APOA1,APOA2,APOB,APOC2,APOC3,APOE,AR,CACNA1D,CACNA1S,CACNB2,CD40LG,CETP,CKM,EPHX2,ESR1,F2,F7,GABRA5,GHR,IL6,ITIH4,LBP,LPA,MTTP,NNMT,NPC1L1,NR3C1,QPRT,SELP,STAP1,TNNT2
Metabolic syndrome X	6.89e-09	NaN	ACADL,ACOX1,ACOX2,ACSL1,ADRA1A,ADRA1B,AGTR1,APOC3,AR,CA12,CA14,CA3,CA5A,CA9,CACNA1D,CACNA1S,CACNB2,CAT,CCL5,CCR5,CETP,CYP2E1,CYP4A11,ENPP1,ESR2,F2,FABP4,FABP5,GHR,GHRL,GNMT,GUCY1A1,HSD17B13,IL6,LBP,LEP,LIPC,LTA,MAPK13,MOGAT2,MOGAT3,NNMT,NPC1L1,P2RY1,P2RY12,PDE3A,PDE5A,PNPLA3,PPARGC1A,QPRT,RBP4,SCD,SELE,SELP,THBS1
Lower respiratory tract disorder	6.95e-09	NaN	ABCA12,ADORA2A,ADORA2B,ADRA1A,ADRA1B,ADRA2B,AGER,AGK,AGTR1,ANKS1B,APOB,AREG,ATP8B2,BCL2,BIRC5,C7,CA12,CA14,CA3,CA5A,CA9,CCL5,CD69,CHRM2,CHRNA1,CHRNA4,CLDN2,CLTRN,COL21A1,CTSG,CXCL11,CYP11A1,CYP3A4,CYSLTR1,CYSLTR2,DDR1,DEK,DLK1,DNAH6,DPEP1,DSCAM,E2F5,EPCAM,EPHX1,FABP5,FGL1,FOXA3,GABRA5,GABRB3,GABRE,GABRG3,GABRR2,GATA3,GJB1,GRIN2D,GRIN3A,HELLS,HPGD,IGF1,IL18R1,IL6,KCNMA1,KIF15,LBP,LCN2,LDHB,LTF,LYZ…
Tumorigenesis of adenocarcinoma	9.31e-09	NaN	AASS,ABCA10,ABCA12,ABCA4,ABCA6,ABCA8,ABCC11,ABHD11,ACAD11,ACAT1,ACOT1,ACOT12,ACTG1,ACTN2,ADAM28,ADAMTS10,ADAMTSL3,ADAMTSL4,ADCY10,ADD2,ADGRB3,ADH1A,ADH1C,ADORA2A,ADORA2B,ADRA1B,AFF3,AFM,AGAP2,AGER,AGK,AGRN,AGXT,AGXT2,AHNAK2,AIF1,AK7,AKAP2,AKAP6,AKNA,AKR1B1,AKR1C1/AKR1C2,ALAS2,ALDH1B1,ALDH1L1,ALDH5A1,ALDOA,ALPK2,AMBP,ANGPT1,ANK2,ANKRD24,ANKRD55,ANKS1B,ANLN,ANO2,ANO5,ANPEP,ANXA2,ANXA3,ANXA8/ANXA8L1…
Endometrioid endometrial adenocarcinoma	1.01e-08	NaN	AASS,ABCA10,ABCA12,ABCA4,ABCA5,ABCA6,ABCA8,ABCA9,ABCB4,ABCC11,ABCC2,ABCC6,ABCC9,ABCG5,ACACB,ACADSB,ACOT12,ACOX1,ACSL1,ACSM1,ACSM2B,ACTN4,ADAM9,ADAMTSL4,ADCY1,ADCY10,ADRA1A,AFAP1L2,AGAP5 (includes others),AGK,AGMO,AGT,AGXT2,AHNAK2,AJAP1,AK7,AKAP6,AKR1C1/AKR1C2,ALDH1B1,ALDH1L1,ALDH4A1,ALDH8A1,ALDOB,ALPK2,ALPK3,AMPD1,AMPH,ANGPT2,ANGPTL3,ANK2,ANKDD1A,ANKRD18A,ANKRD44,ANKS1B,ANO2,ANO5,AOC2,APOB,AQP9,A…
Contraction of striated muscle	1.06e-08	NaN	ALDOA,ANK2,ATP1A2,BMP10,CHRNA1,CSRP3,DMD,DTNA,GJA5,JSRP1,KCNH2,KCNQ1,KLHL41,MYH14,MYH3,MYH7,MYL2,MYL3,PGAM2,PIK3CG,SCN1B,SCN3B,SCN4B,SLC8A1,TCAP,TNNC2,TNNI2,TNNT1,TNNT2,TNNT3,TPM1,TTN
Pancreatobiliary tumor	1.19e-08	NaN	A1BG,A2M,ABCA12,ABCA9,ABCB11,ABCB4,ABCC9,ABCG2,ABO,ACACB,ACAP1,ACOXL,ACSM5,ACSS3,ACTN2,ADAM33,ADAM9,ADAMTS10,ADAMTS13,ADAMTS17,ADAMTSL3,ADAP1,ADCY1,ADCY8,ADH1B,ADH1C,ADH4,ADRA1A,ADRA2B,AFAP1L2,AFF3,AFP,AGAP2,AGBL2,AGT,AGXT2,AHNAK2,AJAP1,AKAP6,AKR1B1,ALDOA,ALPK2,ALPL,ALYREF,AMBP,AMHR2,AMPD1,AMPH,ANGPT1,ANK2,ANKDD1A,ANKRD24,ANKRD29,ANKRD6,ANPEP,ANXA2,APOB,APOC1,APOC4,AQP4,AQP7,AR,AREG,ARHGAP22,ARHG…
Complement component deficiency	1.22e-08	NaN	C1QA,C1QB,C1S,C2,C3,C5,C6,C7,C8A,C8B,C9,CFB,MASP2,SERPING1
Upper gastrointestinal tract tumor	1.28e-08	NaN	A1BG,A2M,ABCA10,ABCA12,ABCA4,ABCA6,ABCA8,ABCB4,ABCC9,ACAD11,ACMSD,ACOT12,ACSS3,ACTN2,ADAM15,ADAM28,ADAM9,ADAMTS10,ADAMTS13,ADAMTS17,ADAMTSL3,ADAMTSL4,ADAT3,ADCY10,ADCY8,ADHFE1,ADRA1A,ADRA2B,AGAP2,AGAP5 (includes others),AGRN,AGT,AGTR1,AGXT,AHNAK2,AHSG,AJAP1,AKAP2,AKAP6,AKR1B1,ALDH2,ALYREF,AMHR2,AMPD1,AMPH,AMT,AMY2B,ANGPT1,ANGPT2,ANGPTL6,ANKRD44,ANKRD6,ANKS1B,ANKS6,ANLN,ANO5,AOX1,APBA1,APBB1,APOB,…
Tauopathy	1.28e-08	NaN	A2M,ABAT,ABCG2,ADGRL2,ADRA1A,ADRA1B,ADRA2B,AFM,AGER,AGRN,AGT,AKAP2,ALDH1L1,ALDH2,ALDH5A1,ALOX15,AMPH,APBB1,APBB3,APOA1,APOA2,APOA4,APOC1,APOC2,APOC3,APOC4,APOE,AR,ARG1,ASB2,ATP1A1,ATP1A2,ATP1A4,ATP1B1,BAG1,BCHE,BCL2,BMP6,BRCA1,C1R,C3,C3orf67,C5,C7,C9,CACNB2,CASP4,CBS/CBSL,CCL27,CCNB1,CD40LG,CDK1,CETP,CFB,CHI3L1,CHRM2,CHRNA1,CHRNA4,CLEC3B,CLU,CNKSR1,CNKSR2,CNKSR3,CNN1,COCH,CR1,CTNNA3,CXCL12,CYP11A…
Gastro-esophageal carcinoma	1.29e-08	NaN	A2M,ABCA10,ABCA12,ABCA4,ABCA8,ABCC9,ACMSD,ACOT12,ACSS3,ACTN2,ADAM28,ADAM9,ADAMTS10,ADAMTSL4,ADAT3,ADCY8,ADHFE1,ADRA1A,AGAP2,AGRN,AGTR1,AGXT,AHNAK2,AJAP1,AKAP2,AKAP6,AMHR2,AMPH,AMT,AMY2B,ANGPT2,ANKRD44,ANKRD6,ANLN,AOX1,APBA1,APBB1,APOB,APOE,AQP7,AR,AREG,ARHGAP28,ARID4A,ASCL1,ASIC3,ASXL3,ATP2B2,ATP6V1B1,AXIN2,AZGP1,BACE2,BATF,BCHE,BCL2,BEX2,BIRC5,BLK,BMP10,BSN,BTBD11,C11orf54,C11orf70,C1orf116,C1QL…
Uterine carcinoma	1.44e-08	NaN	A1CF,AASS,ABCA10,ABCA12,ABCA4,ABCA5,ABCA6,ABCA8,ABCA9,ABCB4,ABCC11,ABCC2,ABCC6,ABCC9,ABCG5,ACACB,ACADSB,ACOT12,ACOX1,ACSL1,ACSM1,ACSM2B,ACTN4,ADAM9,ADAMTSL4,ADCY1,ADCY10,ADI1,ADRA1A,AFAP1L2,AGAP5 (includes others),AGK,AGMO,AGT,AGXT2,AHNAK2,AJAP1,AK7,AKAP6,AKR1C1/AKR1C2,ALDH1B1,ALDH1L1,ALDH4A1,ALDH8A1,ALDOB,ALPK2,ALPK3,AMPD1,AMPH,ANGPT2,ANGPTL3,ANK2,ANKDD1A,ANKRD18A,ANKRD44,ANKS1B,ANO2,ANO5,AOAH,A…
Benign oral disorder	1.6e-08	NaN	ACTA1,ADRA2B,ALAD,AR,ATP1B1,BMP4,C1R,C1S,C3,C5,CCL18,CCL20,CCND1,CCNE1,CCNE2,CCR5,CCR7,CD6,CD69,CEL,CELSR2,CHRM2,CKAP2L,CLU,CNNM4,COCH,COMP,CSRP3,CXCL12,CYP3A4,CYP3A5,E2F1,E2F2,EDAR,EGR1,ELF3,ENAM,ETNK2,EVC2,FAM20A,FAM83H,FASLG,FCGR1B,FERMT1,FRMD4A,GABRA5,GABRB3,GABRE,GABRG3,GABRR2,GPR68,GRHL3,GRIN2D,GRIN3A,H19,HOXA2,HRAS,HSPB3,HYAL1,IFIT3,IFITM1,IGF2,IL21,IL6,IL6R,ITGB6,KCNQ1,KDF1,KDM1A,KLHL41,K…
Occlusion of blood vessel	1.77e-08	NaN	AADAT,ABO,ACAA1,ACAT1,ADORA2A,ADORA2B,ADRA1A,ADRA1B,ADRA2B,AGER,AGTR1,ALDH5A1,AMY2B,ANKRD29,APCS,APOA1,APOA5,APOB,APOC2,APOC3,APOE,AR,ARHGAP9,ASIC2,ASIC3,BCL2,BIRC5,CA12,CA14,CA3,CA5A,CA9,CACNA1D,CACNA1S,CACNB2,CACNB3,CD40LG,CD55,CDCP1,CDKN1A,CDR2L,CERS6,CETP,CKM,CLIC5,CLU,CPEB3,CPS1,CTNNA3,CXCL12,CYP2C19,CYP2C9,EDN1,EGR1,ESR1,ESR2,F10,F2,F5,FGA,FRMD4A,GABRA5,GABRB3,GABRE,GABRG3,GABRR2,GGCX,GHR,G…
Acute leukemia	1.9e-08	NaN	ABCA10,ABCA9,ABCB11,ABCB4,ABCC11,ABCG2,ABCG5,ABCG8,ACER2,ACTG1,ACTN2,ADCY1,ADORA2A,ADRA1A,ADRA1B,AGAP5 (includes others),AHNAK2,AKAP2,ALDH4A1,ALPK3,ANGPT1,ANK2,ANKRD20A4 (includes others),ANKRD53,ANKS1B,ANPEP,APCDD1,APOB,APOBEC3D,AQP7,ARHGAP9,ARL9,ASAP3,ASRGL1,ASXL3,ATG4D,ATP1A4,ATP1B1,ATP8B1,AURKA,AURKB,AXIN2,B3GALT1,BAAT,BACH2,BAG1,BCL10,BCL11B,BCL2,BCL2L14,BEST1,BIRC5,BRCA1,BTNL9,C6,CA9,CACNA1…
Colon adenocarcinoma	2.1e-08	NaN	ABCA10,ABCA12,ABCA4,ABCA5,ABCA6,ABCA8,ABCA9,ABCC11,ABCC6,ABCG5,ABI3,ACACB,ACAT1,ACMSD,ACOT12,ACTA1,ACTG1,ACTN2,ADAM28,ADAM32,ADAMTS10,ADAMTS13,ADAMTSL4,ADCY10,ADCY8,ADD2,ADORA2A,ADRA1A,ADRA1B,AFAP1L2,AFF3,AFM,AGAP5 (includes others),AGBL2,AGMO,AGRN,AHNAK2,AHSA2P,AHSG,AJAP1,AKAP2,AKAP6,AKR1B1,AKR1B10,ALAS2,ALDH1B1,ALDH1L1,ALDH2,ALDH6A1,ALDH8A1,ALDOA,ALOX15,ALPK2,ALPK3,ALPL,AMPD1,ANGPT1,ANGPT2,ANK2…
Atherosclerosis	2.17e-08	NaN	AADAT,ACAA1,ACAT1,ADORA2A,ADORA2B,ADRA2B,AGER,AGTR1,ALDH5A1,AMY2B,ANKRD29,APCS,APOA1,APOA5,APOB,APOC2,APOC3,APOE,AR,ARHGAP9,ASIC2,ASIC3,BCL2,BIRC5,CA12,CA14,CA3,CA5A,CA9,CACNA1D,CACNA1S,CACNB2,CACNB3,CD40LG,CD55,CDCP1,CDKN1A,CDR2L,CERS6,CETP,CLIC5,CLU,CPEB3,CTNNA3,CYP2C19,CYP2C9,EDN1,EGR1,ESR1,ESR2,F10,F2,FRMD4A,GABRA5,GABRB3,GABRE,GABRG3,GABRR2,GHR,GRIN2D,GRIN3A,GUCY1A1,H2AFX,HGF,IGF1,IL6,IMPDH1…
Vaso-occlusion	2.41e-08	NaN	AADAT,ABO,ACAA1,ACAT1,ADORA2A,ADORA2B,ADRA1A,ADRA1B,ADRA2B,AGER,AGTR1,ALDH5A1,AMY2B,ANKRD29,APCS,APOA1,APOA5,APOB,APOC2,APOC3,APOE,AR,ARHGAP9,ASIC2,ASIC3,BCL2,BIRC5,CA12,CA14,CA3,CA5A,CA9,CACNA1D,CACNA1S,CACNB2,CACNB3,CD40LG,CD55,CDCP1,CDKN1A,CDR2L,CERS6,CETP,CKM,CLIC5,CLU,CPEB3,CPS1,CTNNA3,CXCL12,CYP2C19,CYP2C9,EDN1,EGR1,ESR1,ESR2,F10,F2,F5,FGA,FRMD4A,GABRA5,GABRB3,GABRE,GABRG3,GABRR2,GGCX,GHR,G…
Pancreatic mass	2.59e-08	NaN	A2M,ABCA12,ABCA9,ABCB11,ABCB4,ABCC9,ABCG2,ABO,ACACB,ACAP1,ACOXL,ACSM5,ACSS3,ACTN2,ADAM33,ADAM9,ADAMTS10,ADAMTS13,ADAMTS17,ADAMTSL3,ADAP1,ADCY1,ADCY8,ADH4,ADRA1A,ADRA2B,AFAP1L2,AFF3,AGAP2,AGBL2,AGT,AGXT2,AHNAK2,AJAP1,AKAP6,AKR1B1,ALDOA,ALPK2,ALPL,ALYREF,AMHR2,AMPD1,AMPH,ANGPT1,ANK2,ANKDD1A,ANKRD24,ANKRD29,ANKRD6,ANPEP,APOB,APOC1,APOC4,AQP4,AR,AREG,ARHGAP22,ARHGAP28,ARHGAP39,ARHGEF6,ARMC12,ARSE,ASB…
Coronary disease	3.02e-08	NaN	AADAT,ACAA1,ADORA2A,ADORA2B,ADRA1A,ADRA1B,ADRA2B,AGT,AGTR1,ALDH2,ALDH5A1,AMY2B,ANK2,ANKRD29,APOA1,APOA5,APOB,APOC3,APOE,AR,ARHGAP9,ASIC2,ASIC3,C3,C5,CA12,CA14,CA3,CA5A,CA9,CACNA1D,CACNA1S,CACNB2,CACNB3,CD55,CDCP1,CDR2L,CERS6,CETP,CHRNA1,CHRNA4,CLIC5,CPB2,CPEB3,CTNNA3,CXCL12,CYP2C19,CYP2C9,EDN1,ESR1,ESR2,F10,F13A1,F2,F2RL1,F5,FCGR1B,FRMD4A,GABRA5,GABRB3,GABRE,GABRG3,GABRR2,GPD1L,GUCY1A1,HGF,IL18,I…
Pancreatic tumor	3.2e-08	NaN	A2M,ABCA12,ABCA9,ABCB11,ABCB4,ABCC9,ABCG2,ABO,ACACB,ACAP1,ACOXL,ACSM5,ACSS3,ACTN2,ADAM33,ADAM9,ADAMTS10,ADAMTS13,ADAMTS17,ADAMTSL3,ADAP1,ADCY1,ADCY8,ADH4,ADRA1A,ADRA2B,AFAP1L2,AFF3,AGAP2,AGBL2,AGT,AGXT2,AHNAK2,AJAP1,AKAP6,AKR1B1,ALDOA,ALPK2,ALPL,ALYREF,AMHR2,AMPD1,AMPH,ANGPT1,ANK2,ANKDD1A,ANKRD24,ANKRD29,ANKRD6,ANPEP,APOB,APOC1,APOC4,AQP4,AR,AREG,ARHGAP22,ARHGAP28,ARHGAP39,ARHGEF6,ARMC12,ARSE,ASB…
Substance-Related Disorders	4.5e-08	NaN	ABAT,ABCB11,ADH1B,ADH1C,ADORA2A,ADORA2B,ADRA1A,ADRA1B,ADRA2B,ALDH1A1,ALDH2,ALDH5A1,APOA1,APOA2,AR,CA12,CA14,CA3,CA5A,CA9,CACNA1H,CACNA2D3,CAMK4,CCL28,CHRM2,CHRNA1,CHRNA4,CXCL1,CYP2A6 (includes others),CYP2E1,DBH,DDC,ESR1,FASLG,GABRA5,GABRB3,GABRE,GABRG3,GABRR2,GPT,GRIN2D,GRIN3A,GRM5,GSTP1,HTR2B,IL6,IMPDH1,IMPDH2,MAOB,NQO1,NR3C1,OPRL1,OXT,PDE11A,PDE3A,PDE4B,PDE5A,PDE7B,PF4,PNPLA3,SCN1B,SCN3A,SCN3B…
Fibrinolysis	5.55e-08	NaN	APOH,F11,F12,F2,FGA,FGB,FGG,GP1BA,KLKB1,PLG,TMPRSS6
Thrombophilia	5.55e-08	NaN	F10,F2,F5,F8,F9,HABP2,HRG,PROC,PROS1,SERPINC1,SERPIND1
Occlusion of artery	5.6e-08	NaN	AADAT,ACAA1,ACAT1,ADORA2A,ADORA2B,ADRA1A,ADRA1B,ADRA2B,AGER,AGTR1,ALDH5A1,AMY2B,ANKRD29,APCS,APOA1,APOA5,APOB,APOC2,APOC3,APOE,AR,ARHGAP9,ASIC2,ASIC3,BCL2,BIRC5,CA12,CA14,CA3,CA5A,CA9,CACNA1D,CACNA1S,CACNB2,CACNB3,CD40LG,CD55,CDCP1,CDKN1A,CDR2L,CERS6,CETP,CKM,CLIC5,CLU,CPEB3,CTNNA3,CXCL12,CYP2C19,CYP2C9,EDN1,EGR1,ESR1,ESR2,F10,F2,F5,FRMD4A,GABRA5,GABRB3,GABRE,GABRG3,GABRR2,GGCX,GHR,GRIN2D,GRIN3A,…
Insulin resistance	5.67e-08	NaN	ABCG5,ACADL,ACOX1,ACOX2,ACSL1,ADRA1A,ADRA1B,AGTR1,AMY2B,APOA1,APOC3,AR,BLK,CA12,CA14,CA3,CA5A,CA9,CACNA1D,CACNA1S,CACNB2,CAT,CCL5,CCR5,CEL,CETP,CYP2E1,CYP4A11,ENPP1,ESR2,F2,FABP4,FABP5,GHR,GHRL,GNMT,GUCY1A1,HSD17B13,IL6,IMPDH1,IMPDH2,KCNJ11,LBP,LEP,LIPC,LMNA,LTA,MAPK13,MOGAT2,MOGAT3,NNMT,NPC1L1,P2RY1,P2RY12,PDE3A,PDE5A,PNPLA3,PPARGC1A,QPRT,RBP4,SCD,SELE,SELP,THBS1
Disorder of blood pressure	6.01e-08	NaN	ACACB,ACMSD,ACOX1,ACOX2,ACTG2,ADH1A,ADRA1A,ADRA1B,ADRA2B,AFF3,AGER,AGT,AGTR1,ALDH8A1,ALPL,ANKRD29,ANKRD55,APBB3,APOB,APOBEC3B,AR,ASIC2,ASIC3,ATP1A1,ATP8B2,C16orf45,C19orf57,C1S,CA12,CA14,CA3,CA5A,CA9,CACNA1D,CACNA1H,CACNA1S,CACNB2,CACNB3,CAV1,CCBE1,CCL15,CFH,CHN2,CHRM2,CHRNA1,CHRNA4,CIART,CLIC5,COL8A1,CORIN,CPS1,CREB5,CSF2RA,CYP11A1,CYP2E1,CYP3A5,CYP4A11,DAAM2,DBH,DCUN1D5,DDC,DDR1,DHRS1,DLG2,DSC2…
Allergy	6.18e-08	NaN	ADORA2A,ADORA2B,ADRA1A,ADRA1B,ADRA2B,ALPK2,ANXA2P2,AR,BCL11B,BCL2,C1R,C1S,C3,CAMP,CAT,CCL17,CCL18,CCL20,CCL22,CCL27,CCL5,CCNA2,CCR2,CCR4,CD2,CDC25A,CHRM2,CPNE7,CPVL,CSF2,CSF2RA,CTLA4,CX3CR1,CYSLTR1,CYSLTR2,DEFB1,DUSP1,DUSP2,ENO1,ESR1,ESR2,F12,F2RL1,FABP4,FABP5,FADS2,FASLG,FCGBP,FKBP4,FOXP3,FUT7,FYN,GATA3,GPD1,GRB7,H3F3A/H3F3B,HDC,HLA-DPB1,HLA-DQB1,HLA-DRA,HLA-DRB1,HMGCS2,HNMT,HPGDS,HTR2B,IFI27,IL…
Fibrin clot	6.24e-08	NaN	APOH,CPB2,F11,F12,F2,FGA,FGB,FGG,GP1BA,KLKB1,PLG,TMPRSS6
Circumference of waist	8.37e-08	NaN	APOA2,APOE,AR,ESR1,FABP1,GCGR,HSD11B1,IL6,LEPR,LIPC,LMNA,LTA,MEIS2,NMB,NR0B2,NR3C1,PLIN1,PPARGC1A,RUNX1T1
Astrocytoma	9.37e-08	NaN	ABAT,ABCA8,ABCG2,ABCG8,ACTN4,ADAMTS13,ADCY8,ADGRB1,ADGRB3,AGAP2,AGAP5 (includes others),AKR1C1/AKR1C2,ALDH1A1,ALDH2,ALDH5A1,ALPK2,ANGPT2,ANK2,ANKRD20A4 (includes others),ANLN,ANO2,AOAH,AOX1,AQP7,ARHGAP15,ASB2,ASPA,ASPHD1,ASXL3,ATF7IP2,ATP1B1,AXDND1,AXIN2,BAG1,BCL11A,BIRC5,BMF,BRCA1,C6,CA12,CA9,CACNA1S,CAND2,CAPN3,CAV1,CBWD3/CBWD6,CCR2,CCR5,CD200,CD200R1L,CD48,CDK3,CDKN1A,CDKN3,CENPF,CFI,CHRFAM7A,…
Alcohol use disorder	9.88e-08	NaN	ABAT,ABCB11,ADORA2A,ADRA1A,ADRA1B,ADRA2B,ALDH1A1,ALDH2,ALDH5A1,AR,CA12,CA14,CA3,CA5A,CA9,CACNA1H,CACNA2D3,CCL28,CXCL1,CYP2E1,DBH,FASLG,GABRA5,GABRB3,GABRE,GABRG3,GABRR2,GPT,GRM5,GSTP1,HTR2B,IL6,NR3C1,PDE11A,PDE3A,PDE4B,PDE5A,PDE7B,PF4,PNPLA3,SCN1B,SCN3A,SCN3B,SCN4B,SCN9A,SIGMAR1,SLC10A1,SLC7A11,SRD5A2
Hypertension	1.16e-07	NaN	ACACB,ACMSD,ACOX1,ACOX2,ACTG2,ADH1A,ADRA1A,ADRA1B,ADRA2B,AFF3,AGER,AGT,AGTR1,ALDH8A1,ALPL,ANKRD29,ANKRD55,APBB3,APOB,APOBEC3B,AR,ASIC2,ASIC3,ATP1A1,ATP8B2,C16orf45,C19orf57,C1S,CA12,CA14,CA3,CA5A,CA9,CACNA1D,CACNA1H,CACNA1S,CACNB2,CACNB3,CAV1,CCBE1,CCL15,CFH,CHN2,CHRM2,CHRNA1,CHRNA4,CIART,CLIC5,COL8A1,CORIN,CPS1,CREB5,CSF2RA,CYP11A1,CYP2E1,CYP3A5,CYP4A11,DAAM2,DCUN1D5,DDR1,DHRS1,DLG2,DSC2,EDN1,EP…
Amyloidosis	1.24e-07	NaN	A2M,ABAT,ABCG2,ADGRL2,ADRA1A,ADRA1B,ADRA2B,AFM,AGER,AGRN,AGT,AKAP2,ALDH1L1,ALDH2,ALDH5A1,ALOX15,AMPH,APBB1,APBB3,APOA1,APOA2,APOA4,APOC1,APOC2,APOC3,APOC4,APOE,AR,ARG1,ASB2,ATP1A1,ATP1A2,ATP1A4,ATP1B1,BAG1,BCHE,BCL2,BMP6,BRCA1,C1R,C3,C3orf67,C5,C7,C9,CACNB2,CASP4,CBS/CBSL,CCL27,CCNB1,CCND1,CD27,CD38,CD40LG,CDK1,CETP,CFB,CHI3L1,CHRM2,CHRNA1,CHRNA4,CLEC3B,CLU,CNKSR1,CNKSR2,CNKSR3,CNN1,COCH,CR1,CTNN…
Dengue fever	1.25e-07	NaN	C3,C5,CCL5,CD69,CTLA4,F10,F12,F2,F3,F5,F7,F8,F9,FGA,FOXP3,GPT,IL6,PF4,PROC,PROS1,PTPRC,SELL,SERPINC1
Cardiac fibrillation	1.3e-07	NaN	ABCC9,ACTN2,ADRA1A,ADRA1B,ADRA2B,AGTR1,AMY2B,AR,ASB2,ATP1A1,ATP1A2,ATP1A4,ATP1B1,CACNA1D,CACNA1S,CACNB2,CACNB3,CHRM2,CYP2D6,DSG2,F10,F2,FRMD4B,GJA5,IL6,KCNA5,KCNH2,KCNJ5,KCNJ8,KCNMA1,KCNQ1,LMNA,MAOB,MMP1,MPO,MYBPC2,NPC1L1,NR3C1,NTRK2,P2RY1,P2RY12,PKP2,SCN1B,SCN3B,SCN4B,SERINC2,SERPINC1,SLC8A1,TFPI,TTN,TUBA1C,TUBB1,TUBB4B,TUBG1,VCAM1,ZC3HAV1L
Insulin-dependent diabetes mellitus	1.43e-07	NaN	ACSL1,AGER,AGT,AGTR1,AIF1,ALDH2,APOM,BACH2,CALCR,CCR2,CCR5,CD40LG,CFB,CLEC2B,CLEC2D,CMAHP,COL11A2,COL27A1,CTLA4,CUX2,DDR1,EYA2,FGF14,FOXP3,GCGR,GHRL,HCG4,HCP5,HIST1H2BF,HIST1H2BO,HIST1H3B,HIST1H3I,HIST1H4L,HLA-DMA,HLA-DOA,HLA-DPA1,HLA-DQA2,HLA-DQB1,HLA-DQB2,HLA-DRA,HLA-F,HLA-L,ICOS,IL6,IMPDH1,IMPDH2,ITPR3,KCNAB3,KCNJ11,LEP,LPA,LRP8,LST1,LTA,MR1,MS4A1,NEBL,NKAPL,NRG3,PDCD1,PGM1,POU6F2,PPP2R2B,PRKC…
Prostatic intraepithelial neoplasia	1.43e-07	NaN	AGER,AGTR1,ANXA2,APOA2,AURKA,AURKB,BCL2,C1R,C3,CCND1,CDH3,CFB,CFH,CFI,ENTPD5,ESR1,ESR2,FHL2,GATA3,GPRC5A,GPX2,GPX3,HSD17B6,IER3,ITGA6,ITGB4,KRT7,LTF,MMP7,MUC1,NCOA7,ORM1,PRC1,PROM1,PTGDS,RCAN2,S100A8,SERPING1,SFN,TFF3
Brain lesion	1.5e-07	NaN	ABAT,ABCG8,ADAMTS13,ADCY8,ADRA1A,ADRA1B,ADRA2B,AGAP5 (includes others),AK7,AKAP2,AKR1C1/AKR1C2,ALAD,ALDH5A1,ALPK2,ANGPT1,ANGPT2,ANK2,ANKRD20A4 (includes others),ANLN,ANO2,AOAH,AOX1,APOA1,APOB,AQP7,ARHGAP15,ASPHD1,ASXL3,ATF7IP2,ATP1A1,ATP1A2,ATP1A4,AXDND1,BAG1,BCHE,BCL11A,BIRC5,BLK,BMF,BRCA1,C6,CA9,CACNA1D,CACNA1S,CACNB2,CACNB3,CALB2,CAND2,CBWD3/CBWD6,CCR2,CCR5,CD200R1L,CENPF,CFI,CHI3L1,CHRFAM7A,C…
Alzheimer disease	1.53e-07	NaN	A2M,ABAT,ABCG2,ADGRL2,ADRA1A,ADRA1B,ADRA2B,AFM,AGER,AGRN,AGT,AKAP2,ALDH1L1,ALDH2,ALDH5A1,ALOX15,AMPH,APBB1,APBB3,APOA1,APOA2,APOA4,APOC1,APOC2,APOC3,APOC4,APOE,AR,ARG1,ASB2,ATP1A1,ATP1A2,ATP1A4,ATP1B1,BAG1,BCHE,BCL2,BMP6,BRCA1,C1R,C3,C3orf67,C5,C7,C9,CACNB2,CASP4,CBS/CBSL,CCL27,CCNB1,CD40LG,CDK1,CETP,CFB,CHI3L1,CHRM2,CHRNA1,CHRNA4,CLEC3B,CLU,CNKSR1,CNKSR2,CNKSR3,CNN1,COCH,CR1,CTNNA3,CXCL12,CYP11A…
Supraventricular arrhythmia	1.54e-07	NaN	ABCC9,ADORA2A,ADORA2B,ADRA1A,ADRA1B,ADRA2B,AGTR1,AMY2B,AR,ASB2,ATP1A1,ATP1A2,ATP1A4,ATP1B1,CACNA1D,CACNA1S,CACNB2,CACNB3,CHRM2,CYP2D6,F10,F2,FRMD4B,GJA5,IL6,KCNA5,KCNH2,KCNJ5,KCNMA1,KCNQ1,MAOB,MMP1,MPO,MYBPC2,NPC1L1,NR3C1,NTRK2,P2RY1,P2RY12,SCN1B,SCN3B,SCN4B,SERINC2,SERPINC1,SLC8A1,TFPI,TTN,TUBA1C,TUBB1,TUBB4B,TUBG1,VCAM1,ZC3HAV1L
Atrial fibrillation	1.85e-07	NaN	ABCC9,ADRA1A,ADRA1B,ADRA2B,AGTR1,AMY2B,AR,ASB2,ATP1A1,ATP1A2,ATP1A4,ATP1B1,CACNA1D,CACNA1S,CACNB2,CACNB3,CHRM2,CYP2D6,F10,F2,FRMD4B,GJA5,IL6,KCNA5,KCNH2,KCNJ5,KCNMA1,KCNQ1,MAOB,MMP1,MPO,MYBPC2,NPC1L1,NR3C1,NTRK2,P2RY1,P2RY12,SCN1B,SCN3B,SCN4B,SERINC2,SERPINC1,SLC8A1,TFPI,TTN,TUBA1C,TUBB1,TUBB4B,TUBG1,VCAM1,ZC3HAV1L
Nonsquamous non-small cell lung carcinoma	1.85e-07	NaN	ABCA12,ACTN2,ADGRB3,ADH1C,ADRA1B,AFM,AGK,AGRN,AHNAK2,ALDH1B1,ALDOA,ANGPT1,ANK2,ANKS1B,ANO2,ANXA3,APOB,APOBEC3B,AR,AREG,ARHGEF6,ARID3C,ASXL3,ATP2B2,ATP8B2,ATRNL1,AXIN2,B3GAT1,BACE2,BCHE,BCL11A,BCL2,BLK,BMX,BRCA1,BSN,C1orf159,C2orf16,C7,C8B,C9,CAT,CAV1,CCDC102B,CCDC9B,CCNA2,CCNB1,CCNB2,CCND1,CCNE1,CD244,CD48,CD6,CDC20,CDC6,CDCA2,CDH23,CDH26,CDK1,CDKN1A,CENPF,CES2,CFH,CHRNA4,CKS2,CLDN10,CLDN2,CLDN3,…
Stomach tumor	2.01e-07	NaN	A2M,ABCA10,ABCA12,ABCC9,ACMSD,ACOT12,ACTN2,ADAM15,ADAM28,ADAM9,ADAMTS10,ADAMTSL4,ADAT3,ADCY8,ADHFE1,ADRA1A,ADRA2B,AGRN,AGXT,AHNAK2,AKAP2,AKR1B1,ALYREF,AMHR2,AMPH,AMT,AMY2B,ANGPT2,ANKRD44,ANKRD6,ANLN,APBA1,APBB1,APOE,AR,AREG,ARID4A,ASCL1,ASXL3,ATP2B2,ATP6V1B1,AXIN2,AZGP1,BACE2,BATF,BCL10,BCL2,BEX2,BIRC5,BLK,BMP10,BRCA1,BSN,BTBD11,C11orf54,C11orf70,C1QL1,C1QTNF3,C3,C6,C8B,CACNA1D,CACNA1H,CACNA2D3,C…
Bacterial Infections	2.02e-07	NaN	ABCC2,ADRA1A,ADRA1B,ADRA2B,C1QB,C1QBP,C3,C5,CAMP,CCL18,CCR5,CCR7,CCRL2,CD19,CD22,CD27,CD28,CD79A,CFHR3,CHIT1,CHRM2,CISH,CLEC2B,CLU,CSF2,CTSG,CXCR1,CYBB,CYSLTR1,CYSLTR2,DPEP1,ECRP,ENPP2,EPAS1,F5,F8,FCGR1B,GABRA5,GABRB3,GABRE,GABRG3,GDF15,GRIN2D,GRIN3A,GZMM,ICOS,IGLL1/IGLL5,IL12RB1,IL18,IL27,IL6,KCNH2,LCN2,LILRB5,LTA,LTF,LY86,LY96,MARCO,MIF,MPO,NR3C1,NRG1,OLFM4,PDE11A,PDE3A,PDE4B,PDE5A,PDE7B,PRKN,S…
Headache	2.14e-07	NaN	ABAT,ADORA2A,ADORA2B,ADRA1A,ADRA1B,ADRA2B,AGTR1,AKR1B1,ALDH5A1,ATP1A2,CA12,CA14,CA3,CA5A,CA9,CACNA1D,CACNA1H,CACNA1S,CACNA2D3,CACNB2,CACNB3,CCL5,CD247,CHRM2,CHRNA4,CLU,CX3CR1,CYP1A2,CYP2B6,ESR1,ESR2,F10,F2,FHL1,GABRA5,GABRB3,GABRE,GABRG3,GRIN2D,GRIN3A,HIST1H2AE,HIST1H2AG,HTR2B,ITGA2B,KCNH2,NR3C1,P2RY1,P2RY12,PDE4B,SCN1B,SCN3A,SCN3B,SCN4B,SCN9A,SIGMAR1,SLC4A4,SLC52A2,SNAP25
Blood protein disorder	2.18e-07	NaN	A2M,ADAM9,ADORA2A,ADRA1A,ADRA1B,ALPL,AMPH,ANXA2,APBA1,ATP1B1,ATP2B2,ATRN,AURKA,BCL2,BIRC5,C19orf57,C3,C3orf67,C5,CAV1,CCL17,CCL5,CCND1,CD19,CD247,CD27,CD28,CD38,CD40LG,CD48,CD52,CD79A,CD79B,CDC20,CDK1,CEBPA,CNTFR,COCH,CSF2,CSF2RA,CTSG,CXCL1,CXCL12,DKK1,E2F2,F10,F2,F5,FAM46C,FCGR1B,FEN1,FGF2,FGFR3,FRMD4B,FRRS1,FYB1,GDF15,GHR,GRIN2D,GRIN3A,HDAC9,HGF,HRAS,HSP90AA1,HSP90AB1,ICOS,IFIT3,IGF1,IGF2,IGLL1…
Dementia	2.2e-07	NaN	A2M,ABAT,ABCG2,ADGRL2,ADRA1A,ADRA1B,ADRA2B,AFM,AGER,AGRN,AGT,AKAP2,ALDH1L1,ALDH2,ALDH5A1,ALOX15,AMPH,APBB1,APBB3,APOA1,APOA2,APOA4,APOB,APOC1,APOC2,APOC3,APOC4,APOE,AR,ARG1,ASB2,ATP1A1,ATP1A2,ATP1A4,ATP1B1,BAG1,BCHE,BCL2,BMP6,BRCA1,C1R,C3,C3orf67,C5,C7,C9,CA12,CA14,CA3,CA5A,CA9,CACNA1D,CACNA1S,CACNA2D3,CACNB2,CACNB3,CASP4,CBS/CBSL,CCL27,CCNB1,CD40LG,CDK1,CETP,CFB,CHI3L1,CHRM2,CHRNA1,CHRNA4,CLEC3B…
Neurological signs	2.24e-07	NaN	A2M,ACAT1,ACTN2,ACTN3,ADORA2A,ADRA1A,ADRA1B,ADRA2B,AFM,AIG1,ALDH2,ALDH6A1,APOA4,APOE,AQP4,ASCL1,ATP1B1,ATP2A1,ATP2B2,BBOX1,BCL11B,BCL2,C2orf40,C3,C7,C9,CA12,CACNA2D3,CASQ1,CCL5,CD38,CD48,CDS1,CHAF1B,CHI3L1,CHRM2,CHRNA1,CHRNA4,CLU,COCH,CP,CPNE5,CREB3L1,CYP2B6,CYP2D6,DAAM2,DDC,DGKB,DTNA,ELMO1,ENO3,EPHB2,EPHX2,ESR1,ESR2,ETNPPL,ETV4,F3,F8A1 (includes others),FGF13,FGF2,FGFR4,FGG,FLRT2,FRMD4B,G6PC,GAB…
Primary ovarian cancer	2.6e-07	NaN	ANXA10,ATP6V1B1,BRCA1,CCT5,CD24,CHI3L1,CLDN3,CLDN4,CLEC3B,CP,DHCR24,ECT2,EPCAM,EYA2,FABP4,H19,HMGA1,IFI27,IGF2BP3,IL6,KLK10,KPNA2,LCN2,MMP7,MTHFD2,MUC1,PCLAF,PROM1,RACGAP1,SERPINA1,SLC16A3,TFF3,TYMS
Acute coronary syndrome	2.69e-07	NaN	ADORA2A,ADORA2B,ADRA1A,ADRA1B,ADRA2B,AGT,APOA1,APOB,APOE,AR,C3,C5,CACNA1D,CACNA1S,CACNB2,CACNB3,CD40LG,CD55,CHRNA4,CLU,CXCL12,CYP2C19,CYP2C8,CYP2C9,EDN1,ESR1,ESR2,F10,F12,F13A1,F2,F2RL1,F7,FABP3,FCGR1B,GABRA5,GABRB3,GABRE,GABRG3,GUCY1A1,HGF,IL18,IL6,IL6R,IL6ST,ITGA2B,ITGAL,KCNA5,KCNJ5,LGALS2,LPA,LRP8,LTA,MB,MPO,NGF,NPC1L1,NR3C1,NRG1,OXT,P2RY1,P2RY12,PDE3A,PLA2G2A,PLG,PON1,PTGER1,SELP,SERPINC1,SER…
Gastric cancer	2.96e-07	NaN	A2M,ABCA10,ABCA12,ABCC9,ACMSD,ACOT12,ACTN2,ADAM15,ADAM28,ADAM9,ADAMTS10,ADAMTSL4,ADAT3,ADCY8,ADHFE1,ADRA1A,ADRA2B,AGRN,AGXT,AHNAK2,AKAP2,AMHR2,AMPH,AMT,AMY2B,ANGPT2,ANKRD44,ANKRD6,ANLN,APBA1,APBB1,APOE,AR,AREG,ARID4A,ASCL1,ASXL3,ATP2B2,ATP6V1B1,AXIN2,AZGP1,BACE2,BATF,BCL10,BCL2,BEX2,BIRC5,BLK,BMP10,BRCA1,BSN,BTBD11,C11orf54,C11orf70,C1QL1,C1QTNF3,C3,C6,C8B,CACNA1D,CACNA1H,CACNA2D3,CARD11,CASR,CAV…
Gastric carcinoma	3.16e-07	NaN	A2M,ABCA10,ABCA12,ABCC9,ACMSD,ACOT12,ACTN2,ADAM28,ADAM9,ADAMTS10,ADAMTSL4,ADAT3,ADCY8,ADHFE1,ADRA1A,AGRN,AGXT,AHNAK2,AKAP2,AMHR2,AMPH,AMT,AMY2B,ANGPT2,ANKRD44,ANKRD6,ANLN,APBA1,APBB1,APOE,AR,AREG,ARID4A,ASCL1,ASXL3,ATP2B2,ATP6V1B1,AXIN2,AZGP1,BACE2,BATF,BCL2,BEX2,BIRC5,BLK,BMP10,BSN,BTBD11,C11orf54,C11orf70,C1QL1,C1QTNF3,C3,C6,C8B,CACNA1D,CACNA1H,CARD11,CASR,CBS/CBSL,CCDC102B,CCDC73,CD38,CD3G,CD7…
Infarction	3.2e-07	NaN	ADORA2A,ADORA2B,ADRA1A,ADRA1B,ADRA2B,AGT,APOA1,APOB,APOE,AR,ATP1A1,ATP1A2,ATP1A4,BCHE,C3,C5,CACNA1D,CACNA1S,CACNB2,CACNB3,CD40LG,CD55,CLU,CXCL12,CYP2C19,CYP2C8,CYP2C9,EDN1,ESR1,F10,F13A1,F2,F5,F7,FCGR1B,GUCY1A1,HGF,HTR2B,IL6,IL6R,IL6ST,ITGA2B,ITGAL,KCNA5,KCNJ5,LGALS2,LPA,LRP8,LTA,MB,MUT,NGF,NOS2,NPC1L1,OXT,P2RY1,P2RY12,PDE3A,PLG,PON1,PRKCH,PROC,PROS1,PTGER1,SELP,SERPINC1,SERPINF2,TNNT2,TUBA1C,TUB…
Myeloid neoplasm	3.4e-07	NaN	ABCA10,ABCA12,ABCA9,ABCB11,ABCB4,ABCC11,ABCG2,ABCG5,ABCG8,ACER2,ACTN2,ADAMTS17,ADCY1,ADORA2A,ADRA1A,ADRA1B,AGAP5 (includes others),AHNAK2,AKAP2,ALDH4A1,ALPK3,ANGPT1,ANK2,ANKRD20A4 (includes others),ANKRD53,ANKS1B,ANPEP,APCDD1,APOB,APOBEC3D,AQP7,ARHGAP9,ARL9,ASAP3,ASRGL1,ASXL3,ATG4D,ATP1A4,ATP1B1,ATP8B1,AURKA,AURKB,AXIN2,B3GALT1,B4GALNT3,BAAT,BACH2,BAG1,BCL11B,BCL2,BCL2L14,BEST1,BIRC5,BMP2,BMP6,BR…
Lung adenocarcinoma	3.47e-07	NaN	ABCA12,ACTN2,ADGRB3,ADH1C,ADRA1B,AFM,AGK,AGRN,AHNAK2,ALDH1B1,ALDOA,ANGPT1,ANK2,ANKS1B,ANO2,ANXA3,APOB,APOBEC3B,AR,AREG,ARHGEF6,ARID3C,ASXL3,ATP2B2,ATP8B2,ATRNL1,AXIN2,B3GAT1,BACE2,BCHE,BCL2,BLK,BMX,BRCA1,BSN,C1orf159,C2orf16,C7,C8B,C9,CAT,CAV1,CCDC102B,CCDC9B,CCNA2,CCNB1,CCNB2,CCND1,CCNE1,CD244,CD48,CD6,CDC20,CDC6,CDCA2,CDH23,CDH26,CDK1,CDKN1A,CENPF,CES2,CFH,CHRNA4,CKS2,CLDN10,CLDN2,CLDN3,CLDN4,C…
Dyskinesia	3.63e-07	NaN	A2M,ACAT1,ACTN2,ACTN3,ADORA2A,ADRA1A,ADRA1B,ADRA2B,AFM,AIG1,ALDH2,ALDH6A1,APOA4,APOE,AQP4,ASCL1,ATP1B1,ATP2A1,ATP2B2,BBOX1,BCL11B,BCL2,C2orf40,C3,C7,C9,CA12,CACNA2D3,CASQ1,CCL5,CD38,CD48,CDS1,CHAF1B,CHI3L1,CHRM2,CHRNA1,CHRNA4,CLU,COCH,CP,CPNE5,CREB3L1,CYP2D6,DAAM2,DDC,DGKB,DTNA,ELMO1,ENO3,EPHB2,EPHX2,ETNPPL,ETV4,F3,F8A1 (includes others),FGF13,FGF2,FGFR4,FGG,FLRT2,FRMD4B,G6PC,GABRA5,GABRB3,GABRE,…
Familial cardiomyopathy	3.76e-07	NaN	ABCC9,ACTA1,ACTN2,AGK,ALPK3,ANKRD1,APOA1,CACNB2,CHRM2,CSRP3,CTNNA3,DES,DMD,DSC2,DSG2,DTNA,FHL1,FHL2,FLNC,GJA5,KCNA5,KCNH2,KCNJ8,KCNQ1,LDB3,LMNA,MYH7,MYL2,MYL3,MYOM1,MYPN,NEBL,PKP2,RORC,SCN1B,SCN3B,SCN4B,SGCD,SYNE1,TCAP,TNNT2,TPM1,TTN,TTR
Glioma cancer	3.85e-07	NaN	ABAT,ABCA8,ABCG2,ACTN4,ADGRB1,ADGRB3,AGAP2,ALAD,ALDH1A1,ALDH2,ALDH5A1,ANGPT2,ASB2,ASPA,ATP1B1,AXIN2,BRCA1,CAPN3,CAV1,CCND1,CD200,CD48,CDK3,CDKN1A,CDKN2B,CDKN3,CKS2,CLCN4,CLEC2D,CLU,COCH,CSF2,CSF2RA,CTLA4,CXCL1,CXCR6,DBH,DDR1,DMBT1,DTNA,ECT2,ELMO1,ENPP2,EPHA2,EPHB6,EPPK1,EVI2A,FA2H,FGF2,FGFR3,FLT3,FOLH1,FOXM1,FRMD4B,FRRS1,GFRA1,GNAO1,GPER1,GPR37,GPRASP1,H3F3A/H3F3B,HGF,HIST1H3B,HLF,HRAS,HSP90AA1,H…
Bone marrow neoplasm	4.33e-07	NaN	ABCA10,ABCA12,ABCA9,ABCB11,ABCB4,ABCC11,ABCG2,ABCG5,ABCG8,ACER2,ACTN2,ADAMTS17,ADCY1,ADORA2A,ADRA1A,ADRA1B,AGAP5 (includes others),AHNAK2,AKAP2,ALDH4A1,ALPK3,ANGPT1,ANK2,ANKRD20A4 (includes others),ANKRD53,ANKS1B,ANPEP,APCDD1,APOB,APOBEC3D,AQP7,ARHGAP9,ARL9,ASAP3,ASRGL1,ASXL3,ATG4D,ATP1A4,ATP1B1,ATP8B1,AURKA,AURKB,AXIN2,B3GALT1,B4GALNT3,BAAT,BACH2,BAG1,BCL11B,BCL2,BCL2L14,BEST1,BIRC5,BMP2,BMP6,BR…
Acute myeloid leukemia	4.38e-07	NaN	ABCA10,ABCA9,ABCB11,ABCB4,ABCC11,ABCG2,ABCG5,ABCG8,ACER2,ACTN2,ADCY1,ADORA2A,ADRA1A,ADRA1B,AGAP5 (includes others),AHNAK2,AKAP2,ALDH4A1,ALPK3,ANGPT1,ANK2,ANKRD20A4 (includes others),ANKRD53,ANKS1B,ANPEP,APCDD1,APOB,APOBEC3D,AQP7,ARHGAP9,ARL9,ASAP3,ASRGL1,ASXL3,ATG4D,ATP1A4,ATP1B1,ATP8B1,AURKA,AURKB,AXIN2,B3GALT1,BAAT,BACH2,BAG1,BCL11B,BCL2,BCL2L14,BEST1,BIRC5,BRCA1,BTNL9,C6,CA9,CAND2,CCDC7,CCNA2,…
Myeloid leukemia	4.77e-07	NaN	ABCA10,ABCA9,ABCB11,ABCB4,ABCC11,ABCG2,ABCG5,ABCG8,ACER2,ACTN2,ADCY1,ADORA2A,ADRA1A,ADRA1B,AGAP5 (includes others),AHNAK2,AKAP2,ALDH4A1,ALPK3,ANGPT1,ANK2,ANKRD20A4 (includes others),ANKRD53,ANKS1B,ANPEP,APCDD1,APOB,APOBEC3D,AQP7,ARHGAP9,ARL9,ASAP3,ASRGL1,ASXL3,ATG4D,ATP1A4,ATP1B1,ATP8B1,AURKA,AURKB,AXIN2,B3GALT1,BAAT,BACH2,BAG1,BCL11B,BCL2,BCL2L14,BEST1,BIRC5,BRCA1,BTNL9,C6,CA9,CAND2,CCDC7,CCNA2,…
Gastric adenocarcinoma	5.23e-07	NaN	A2M,ABCA10,ABCA12,ABCC9,ACMSD,ACOT12,ACTN2,ADAM28,ADAMTS10,ADAMTSL4,ADAT3,ADCY8,ADHFE1,ADRA1A,AGRN,AGXT,AHNAK2,AKAP2,AMHR2,AMPH,AMT,AMY2B,ANGPT2,ANKRD44,ANKRD6,ANLN,APBA1,APBB1,AR,AREG,ARID4A,ASCL1,ASXL3,ATP2B2,ATP6V1B1,AXIN2,AZGP1,BACE2,BATF,BCL2,BEX2,BLK,BMP10,BSN,BTBD11,C11orf54,C11orf70,C1QL1,C1QTNF3,C3,C6,C8B,CACNA1D,CACNA1H,CARD11,CASR,CBS/CBSL,CCDC102B,CCDC73,CD38,CD3G,CD7,CDC6,CDH2,CDH23,…
Homeostasis of lipid	5.73e-07	NaN	ABCB4,ABCG5,ABCG8,AKR1C1/AKR1C2,ANGPTL3,ANGPTL8,APOA1,APOA2,APOA4,APOA5,APOB,APOC2,APOC3,APOC4,APOE,CAV1,CD24,CETP,EPHX2,GCKR,LCAT,LIPC,RBP1,SOAT2
Coronary artery disease	6.09e-07	NaN	AADAT,ACAA1,ADORA2A,ADORA2B,ADRA2B,AGTR1,ALDH5A1,AMY2B,ANKRD29,APOA1,APOA5,APOB,APOC3,APOE,AR,ARHGAP9,ASIC2,ASIC3,CA12,CA14,CA3,CA5A,CA9,CACNA1D,CACNA1S,CACNB2,CACNB3,CD55,CDCP1,CDR2L,CERS6,CETP,CLIC5,CPEB3,CTNNA3,CYP2C19,CYP2C9,EDN1,ESR1,ESR2,F10,F2,FRMD4A,GABRA5,GABRB3,GABRE,GABRG3,GABRR2,GUCY1A1,IL6,ITGA2B,ITGAL,KDM1A,LIPC,LPA,LRP8,LRRC20,MATN2,MECOM,NNMT,NPC1L1,NR3C1,P2RY1,P2RY12,PBX3,PDE11A,…
Metabolism of xenobiotic	6.36e-07	NaN	CRYZ,CYP2B6,CYP2D6,CYP2D7,CYP46A1,GSTM2,GSTO2,GSTP1,NQO1,NR1I2,SULT1A1,SULT1A2,SULT1B1,UGT1A6,UGT1A7 (includes others),UGT2B11,UGT2B15,UGT2B28,UGT2B4
Peripheral vascular disease	6.56e-07	NaN	ABCG2,ADA2,ADCY8,ADRA1A,ADRA1B,ADRA2B,AGER,AGTR1,AMPH,ANGPT1,ANGPT2,ANKRD6,APOA1,APOB,APOE,APOH,AR,ATP1A1,ATP1A2,ATP1A4,BCHE,BCL2,BEX4,CA12,CA14,CA3,CA5A,CA9,CACNA1D,CACNA1S,CACNB2,CACNB3,CCL18,CCR5,CEMIP,CFH,CFHR1,CHRM2,CHRNA1,CHRNA4,CLEC2B,CPVL,CXCL12,CYP1A1,CYP2C19,CYP2D6,CYTIP,DDC,DLG2,DNAJA1,EDN1,ESR1,ESR2,ETS2,EVI2A,EVI2B,F10,F13A1,F2,F5,FABP3,FYB1,GABRA5,GABRB3,GABRE,GABRG3,GABRR2,GDF2,GHR…
Asthma	7.36e-07	NaN	ABAT,ADORA2A,ADORA2B,ADRA1A,ADRA1B,ADRA2B,ALDH5A1,ALOX15,APOA1,ARG1,BCL2,C1R,C1S,C3,C3orf52,C5,CCL5,CD8A,CHI3L1,CHRM2,CHRNA4,CKM,COCH,CTNNA3,CX3CR1,CYSLTR1,CYSLTR2,DUSP1,ESR2,FCGR1B,FGFR3,FOXP3,FRMD4B,GATA3,GRIN2D,GRIN3A,HNMT,IKZF3,IL17RB,IL6,IMPDH1,IRAK3,ITGA4,KCNA3,KCNMA1,LCN2,LEP,LTC4S,MMP12,MPO,NGF,NOS2,NR3C1,NRG1,NTRK2,PDE11A,PDE3A,PDE4B,PDE5A,PDE7B,PTPRC,SCN1B,SELE,SELL,SERINC2,SERPING1,SLC…
Malignant neoplasm of upper aerodigestive tract	7.38e-07	NaN	A1BG,ABCA12,ABCA4,ABCA8,ABCB4,ABCC9,ACSS3,ACTN2,ADAM9,ADAMTS13,ADAMTSL3,ADCY1,AGAP2,AGT,AGTR1,AHNAK2,AJAP1,AKAP6,ALDH2,ALDOB,AMPH,ANGPT1,ANKRD53,ANO5,AOX1,AQP7,ARFGEF3,ARHGAP15,ARHGAP28,ARHGAP6,ASB12,ASCL1,ASIC3,ATF7IP2,ATP1A4,ATRNL1,AURKA,AXDND1,BAAT,BAG1,BCHE,BCL2,BIRC5,BMP2,BMP4,BUB1B,C1orf116,C1RL,C3orf67,CA9,CACNA1H,CACNA1S,CALCR,CAPN8,CAV1,CCDC102B,CCDC141,CCL19,CCNB1,CCND1,CCR7,CCSER1,CD24…
Chronic pulmonary disease	7.6e-07	NaN	ADORA2A,ADORA2B,ADRA1A,ADRA1B,AGER,AGTR1,BCL2,CA12,CA14,CA3,CA5A,CA9,CCL5,CD69,CHRM2,CHRNA1,CHRNA4,CTSG,CXCL11,CYP3A4,CYSLTR1,CYSLTR2,EDN1,EPHX1,FABP5,GABRA5,GABRB3,GABRE,GABRG3,GABRR2,GATA3,GRIN2D,GRIN3A,IGF1,IL18R1,IL6,LBP,LCN2,LTF,LYZ,MMP1,MMP12,MPO,NOS2,NR3C1,PDE11A,PDE3A,PDE4B,PDE5A,PDE7B,PRF1,PTGER1,SELE,SERPINA1,SLC7A11,TARP,TBX21,TF,TOP2A,TYMS,ZNF214
Chorea	8.35e-07	NaN	A2M,ACAT1,ACTN2,ACTN3,ADORA2A,ADRA1A,ADRA1B,AFM,AIG1,ALDH2,ALDH6A1,APOA4,APOE,AQP4,ASCL1,ATP1B1,ATP2A1,ATP2B2,BBOX1,BCL11B,BCL2,C2orf40,C3,C7,C9,CA12,CACNA2D3,CASQ1,CCL5,CD38,CD48,CDS1,CHAF1B,CHI3L1,CHRM2,CHRNA4,CLU,COCH,CP,CPNE5,CREB3L1,DAAM2,DGKB,DTNA,ELMO1,ENO3,EPHB2,EPHX2,ETNPPL,ETV4,F3,F8A1 (includes others),FGF13,FGF2,FGFR4,FGG,FLRT2,FRMD4B,G6PC,GABRA5,GABRB3,GABRE,GABRG3,GAPDH,GHRL,GNAL,GN…
Pancreatic cancer	9.95e-07	NaN	ABCA12,ABCA9,ABCB11,ABCB4,ABCC9,ABCG2,ABO,ACACB,ACAP1,ACOXL,ACSM5,ACSS3,ACTN2,ADAM33,ADAM9,ADAMTS10,ADAMTS13,ADAMTS17,ADAMTSL3,ADAP1,ADCY1,ADCY8,ADH4,ADRA1A,ADRA2B,AFAP1L2,AFF3,AGAP2,AGBL2,AGT,AGXT2,AHNAK2,AJAP1,ALDOA,ALPK2,ALPL,AMHR2,AMPD1,AMPH,ANGPT1,ANK2,ANKDD1A,ANKRD24,ANKRD29,ANKRD6,ANPEP,APOC1,APOC4,AQP4,AR,AREG,ARHGAP22,ARHGAP39,ARHGEF6,ARMC12,ARSE,ASB12,ASXL3,ATG16L2,ATP1A2,ATP2B2,ATP8B2,…
Huntington's Disease	9.95e-07	NaN	A2M,ACAT1,ACTN2,ACTN3,ADORA2A,ADRA1A,ADRA1B,AFM,AIG1,ALDH2,ALDH6A1,APOA4,APOE,AQP4,ASCL1,ATP1B1,ATP2A1,ATP2B2,BBOX1,BCL11B,BCL2,C2orf40,C3,C7,C9,CA12,CACNA2D3,CASQ1,CCL5,CD38,CD48,CDS1,CHAF1B,CHI3L1,CHRM2,CHRNA4,CLU,COCH,CP,CPNE5,CREB3L1,DAAM2,DGKB,DTNA,ELMO1,ENO3,EPHB2,EPHX2,ETNPPL,ETV4,F3,F8A1 (includes others),FGF13,FGF2,FGFR4,FGG,FLRT2,FRMD4B,G6PC,GABRA5,GABRB3,GABRE,GABRG3,GAPDH,GHRL,GNAL,GN…
Diabetic nephropathy	1.05e-06	NaN	ADRA1A,ADRA1B,ADRA2B,AGT,AGTR1,AIF1,AMBP,APOE,AR,BMP2,CA12,CA14,CA3,CA5A,CA9,CACNA1D,CACNA1S,CACNB2,CAPN3,CCL16,CCND1,CD24,CDS1,CHI3L1,CLEC3B,CLU,CR1,CRHBP,CYP4F2,DPEP1,ELMO1,ENPEP,F3,FABP1,FBP1,FXYD2,GMDS,GPLD1,HPGD,HPN,HYAL1,IGFBP2,IMPDH1,IMPDH2,INSL3,LILRB1,MAGI2,MLXIPL,MYC,NEBL,PDE2A,PKLR,PLCG2,PTGDS,PTGER1,ROBO2,SCD,SERPINC1,SERPIND1,SLC7A11,ST3GAL6,TNNT2,TYRO3,WNT2B
Grade 3-4 tumor	1.08e-06	NaN	ABAT,ACTN4,ALAD,ALDH5A1,BCL2,CCND1,CD19,CD247,CD3D,CD3E,CD3G,CLEC2D,CLEC3B,CLU,CTLA4,ELMO1,ESR1,ESR2,GNRH1,IRF4,KLK10,MS4A1,MUC1,NCAM1,NR3C1,PDCD1,PKM,PRLR,RARRES2,RRM2,SRPK1,TLR7,TOP2A,TUBA1C,TUBB1,TUBB4B,TUBG1,TYMS,UBE2C
Hepatic steatosis	1.08e-06	NaN	ACADL,ACOT1,ACOX1,ACOX2,ADORA2A,AGTR1,ANGPTL6,APOB,AR,CAT,CCR5,CD48,CYP2E1,CYP4A11,ESR1,FABP4,FABP5,GNMT,GPT,GSTP1,HSD17B13,IL6,IMPDH1,IMPDH2,LEP,MAPK13,MOGAT2,MOGAT3,NR1H4,PDE11A,PDE3A,PDE4B,PDE5A,PDE7B,PLCG2,PNPLA3,PPARGC1A,RORC,TARP
Primary hypercholesterolemia	1.17e-06	NaN	APOA1,APOA2,APOB,APOC2,APOC3,APOE,CACNA1D,CACNA1S,CACNB2,CETP,EPHX2,F2,GHR,ITIH4,LPA,MTTP,NNMT,NPC1L1,QPRT,STAP1
Malignant astrocytoma	1.37e-06	NaN	ABAT,ABCA8,ABCG2,ACTN4,ADGRB1,ADGRB3,AGAP2,ALDH1A1,ALDH2,ALDH5A1,ANGPT2,ASB2,ASPA,ATP1B1,AXIN2,BRCA1,CAPN3,CAV1,CD200,CD48,CDK3,CDKN1A,CDKN3,CKS2,CLCN4,CLEC2D,CLU,COCH,CSF2,CSF2RA,CTLA4,CXCL1,CXCR6,DBH,DDR1,DMBT1,DTNA,ECT2,ELMO1,ENPP2,EPHA2,EPHB6,EPPK1,EVI2A,FA2H,FGF2,FGFR3,FLT3,FOLH1,FOXM1,FRMD4B,FRRS1,GFRA1,GNAO1,GPER1,GPR37,GPRASP1,H3F3A/H3F3B,HGF,HIST1H3B,HLF,HRAS,HSP90AA1,HSP90AB1,IGFBP2,IL1…
Acute coronary event	1.42e-06	NaN	ADORA2A,ADORA2B,ADRA1A,ADRA1B,AGT,AGTR1,ANK2,APOA1,AR,C3,C5,CACNA1D,CACNA1S,CACNB2,CACNB3,CXCL12,EDN1,ESR1,ESR2,F10,F13A1,F2,F2RL1,FCGR1B,GPD1L,GUCY1A1,HGF,IL18,IL6,IL6R,IL6ST,ITGA2B,KCNA5,KCNH2,KCNJ5,MB,MYH7,MYOM1,NEBL,NPC1L1,NR3C1,P2RY1,P2RY12,PDE11A,PDE3A,PDE4B,PDE5A,PDE7B,PLG,PON1,PTGER1,SCN3B,SELP,SERPINC1,TFPI,TNNT2,TUBA1C,TUBB1,TUBB4B,TUBG1
Hereditary thrombophilia	1.48e-06	NaN	F2,F5,F9,HABP2,HRG,PROC,PROS1,SERPINC1,SERPIND1
Migraines	1.58e-06	NaN	ABAT,ADORA2A,ADORA2B,ADRA1A,ADRA1B,ADRA2B,AGTR1,AKR1B1,ALDH5A1,ATP1A2,CA12,CA14,CA3,CA5A,CA9,CACNA1D,CACNA1H,CACNA1S,CACNA2D3,CACNB2,CCL5,CD247,CHRM2,CLU,CX3CR1,CYP1A2,ESR1,ESR2,F10,F2,FHL1,GABRA5,GABRB3,GABRE,GABRG3,GRIN2D,GRIN3A,HIST1H2AE,HIST1H2AG,HTR2B,ITGA2B,NR3C1,P2RY1,P2RY12,PDE4B,SCN1B,SCN3A,SCN3B,SCN4B,SCN9A,SIGMAR1,SLC4A4,SNAP25
Glioblastoma	1.58e-06	NaN	ABAT,ABCA8,ABCG2,ADGRB1,ADGRB3,AGAP2,ALDH1A1,ALDH2,ALDH5A1,ANGPT2,ASB2,ASPA,ATP1B1,AXIN2,BRCA1,CAPN3,CAV1,CD200,CD48,CDK3,CDKN1A,CDKN3,CKS2,CLCN4,CLEC2D,CLU,COCH,CSF2,CSF2RA,CTLA4,CXCL1,CXCR6,DBH,DDR1,DMBT1,DTNA,ECT2,ELMO1,ENPP2,EPHA2,EPHB6,EPPK1,EVI2A,FA2H,FGF2,FGFR3,FLT3,FOLH1,FOXM1,FRMD4B,FRRS1,GFRA1,GNAO1,GPER1,GPR37,GPRASP1,H3F3A/H3F3B,HGF,HIST1H3B,HLF,HRAS,HSP90AA1,HSP90AB1,IGFBP2,IL13RA2,I…
Autosomal recessive immunodeficiency	1.76e-06	NaN	BCL10,C1QA,C1QB,C2,C3,C8A,C8B,CARD11,CD19,CD247,CD3D,CD3E,CD3G,CD79A,CD79B,CFI,CPN1,CR2,DOCK2,DSG1,FCN3,FGA,FGB,FGG,HELLS,ICOS,IGLL1/IGLL5,IL12RB1,IL21,IL21R,IL7R,ISG15,JAK3,MASP2,MLPH,MS4A1,MYO5A,PTPRC,RORC,TAP1,TNFRSF13C,UNG,ZAP70
Chronic obstructive pulmonary disease	1.77e-06	NaN	ADORA2A,ADORA2B,ADRA1A,ADRA1B,AGER,AGTR1,BCL2,CA12,CA14,CA3,CA5A,CA9,CCL5,CD69,CHRM2,CHRNA1,CHRNA4,CTSG,CXCL11,CYP3A4,CYSLTR1,CYSLTR2,EPHX1,FABP5,GABRA5,GABRB3,GABRE,GABRG3,GABRR2,GATA3,GRIN2D,GRIN3A,IGF1,IL18R1,IL6,LBP,LCN2,LTF,LYZ,MMP1,MMP12,MPO,NR3C1,PDE11A,PDE3A,PDE4B,PDE5A,PDE7B,PRF1,PTGER1,SELE,SERPINA1,SLC7A11,TARP,TBX21,TF,TOP2A,TYMS,ZNF214
Lymphoproliferative malignancy	1.86e-06	NaN	ABCA10,ABCC9,ABCG2,ACAD11,ACTG1,ADAM9,ADAMTSL3,ADD2,ADGRB1,ADORA2A,ADRA1A,ADRA1B,AFAP1L2,AGTR1,AIG1,ALDH1A1,AMPH,ANGPT2,ANK2,ANKRD20A4 (includes others),ANO5,ANPEP,ANXA2,APBA1,ASMTL-AS1,ASXL3,ATP1A2,ATP1B1,ATP2B2,ATRN,ATRNL1,AURKA,AURKB,B3GAT1,BACH2,BCHE,BCL10,BCL11B,BCL2,BCL2L10,BIRC5,BSCL2,BZW2,C19orf57,C1QTNF7,C1R,C3,C3orf52,C7,C9,CACNA1D,CACNA1S,CACNB2,CACNB3,CARD11,CAV1,CCDC113,CCDC86,CCL17,…
Anxiety Disorders	1.95e-06	NaN	ABAT,ADRA1A,ADRA1B,ADRA2B,ALDH1A1,ALDH2,ALDH5A1,AR,ATP1A1,ATP1A2,ATP1A4,BCHE,CA12,CA14,CA3,CA5A,CA9,CACNA2D3,CHRM2,CHRNA4,DBH,ESR1,ESR2,FRMD4B,GABRA5,GABRB3,GABRE,GABRG3,GABRR2,GPER1,GRIN2D,GRIN3A,GRM5,HTR2B,KCNH2,MAOB,NR3C1,OXT,SCN1B,SCN3A,SCN3B,SCN4B,SCN7A,SCN8A,SCN9A,SIGMAR1,SLC1A1,SLC1A2,SLC1A3,SLC1A4,SLC6A1,SLC6A12,SLC6A13
Anemia	1.99e-06	NaN	ADORA2A,ALAS2,ALDOA,AR,ATP1B1,BAAT,BCL2,BRCA1,C3,C3orf52,C5,CASR,CAT,CCL17,CD52,CFB,CFH,CFHR1,CFHR3,CFI,CUBN,CX3CR1,EDN1,EPB42,F10,F3,FANCE,FANCG,FANCI,FCGR1B,FLT3,FRMD4B,GIPR,GPER1,GPI,GRIN2D,GRIN3A,HAMP,IL6,IMPDH1,IMPDH2,INSL3,KCNN3,KCNN4,LPIN2,MPC1,MPO,MR1,MS4A1,MUT,NQO1,NR3C1,NTRK2,P2RY12,PDCD1,PDE5A,PKLR,PLCG2,PLG,PLK1,PPAT,PRF1,RAD51,RET,RRM2,SELE,SELL,SELP,SERINC2,SERPINC1,SIGMAR1,SLC2A1,S…
Lymphocytic leukemia	2.01e-06	NaN	ABCA10,ACAD11,ACTG1,ADD2,ADGRB1,ADORA2A,AIG1,ALDH1A1,ANK2,ANO5,ANPEP,ATP1B1,ATRNL1,AURKA,B3GAT1,BACH2,BCL10,BCL11B,BCL2,C19orf57,C3orf52,CACNA1D,CACNA1S,CACNB2,CACNB3,CARD11,CCL17,CCND1,CCR4,CCR7,CD19,CD2,CD200,CD22,CD244,CD247,CD28,CD38,CD3D,CD3E,CD3G,CD48,CD52,CD7,CD79A,CD79B,CDC42EP2,CDK1,CDKN1A,CDKN2B,CKAP2L,CLDN14,CNDP1,COCH,COL27A1,CRLF2,CXCL11,CYP1A1,CYP3A5,CYP4F11,DAB1,DAPK1,DDC,DDR1,DDX5…
Bone marrow cancer	2.01e-06	NaN	ABCA10,ABCA12,ABCA9,ABCB11,ABCB4,ABCC11,ABCG2,ABCG5,ABCG8,ACER2,ACTN2,ADAMTS17,ADCY1,ADORA2A,ADRA1A,ADRA1B,AGAP5 (includes others),AHNAK2,AKAP2,ALDH4A1,ALPK3,ANGPT1,ANK2,ANKRD20A4 (includes others),ANKRD53,ANKS1B,ANPEP,APCDD1,APOB,APOBEC3D,AQP7,ARHGAP9,ARL9,ASAP3,ASRGL1,ASXL3,ATG4D,ATP1A4,ATP1B1,ATP8B1,AURKA,AURKB,AXIN2,B3GALT1,B4GALNT3,BAAT,BACH2,BAG1,BCL11B,BCL2,BCL2L14,BEST1,BIRC5,BRCA1,BTNL9,…
Familial hypercholesterolemia	2.03e-06	NaN	APOA1,APOA2,APOB,APOC2,APOC3,APOE,CACNA1D,CACNA1S,CACNB2,CETP,EPHX2,F2,GHR,ITIH4,LPA,MTTP,NPC1L1,STAP1
Lymphocytic neoplasm	2.07e-06	NaN	ABCA10,ABCC9,ABCG2,ACAD11,ACTG1,ADAM9,ADAMTSL3,ADD2,ADGRB1,ADORA2A,ADRA1A,ADRA1B,AFAP1L2,AGTR1,AIG1,ALDH1A1,AMPH,ANGPT2,ANK2,ANKRD20A4 (includes others),ANO5,ANPEP,ANXA2,APBA1,ASMTL-AS1,ASXL3,ATP1A2,ATP1B1,ATP2B2,ATRN,ATRNL1,AURKA,AURKB,B3GAT1,BACH2,BCHE,BCL10,BCL11B,BCL2,BCL2L10,BIRC5,BSCL2,BZW2,C19orf57,C1QTNF7,C1R,C3,C3orf52,C7,C9,CACNA1D,CACNA1S,CACNB2,CACNB3,CARD11,CAV1,CCDC113,CCDC86,CCL17,…
Breast or ovarian carcinoma	2.4e-06	NaN	AASS,ABAT,ABCA10,ABCA12,ABCA4,ABCA8,ABCA9,ABCC11,ABCC9,ABHD17C,ABO,ACACB,ACAD11,ACTG1,ACTN2,ADAM28,ADAMTS10,ADAMTS13,ADAMTSL3,ADCY10,ADCY8,ADD2,ADORA2A,ADRA1B,AFAP1L2,AFF3,AGAP2,AGK,AGT,AHNAK2,AIF1,AIG1,AK7,AKAP2,AKAP6,AKNA,AKR1B1,AKR1C1/AKR1C2,ALDH18A1,ALDH1B1,ALDH1L1,AMPD1,AMPH,ANGPT1,ANGPTL6,ANK2,ANKRD1,ANKRD20A4 (includes others),ANKRD24,ANKRD35,ANKRD55,ANKRD6,ANKS1B,ANLN,ANPEP,ANXA8/ANXA8L1,…
Philadelphia chromosome-negative acute lymphoblastic leukemia	2.51e-06	NaN	ADORA2A,CACNA1D,CACNA1S,CACNB2,CACNB3,CD19,CD247,CD3D,CD3E,CD3G,IKZF1,IMPDH1,IMPDH2,MS4A1,NR3C1,PAX5,PPAT,TOP2A,TUBA1C,TUBB1,TUBB4B,TUBG1,TYMS
Primary dilated cardiomyopthy	2.52e-06	NaN	ABCC9,ANK2,ANKRD1,CSRP3,CTNNA3,DES,DMD,DSC2,DSG2,DTNA,FHL2,FLNC,GPD1L,LDB3,LMNA,MYH7,MYL2,MYOM1,MYPN,NEBL,PKP2,SYNE1,TCAP,TNNT2,TPM1,TTN
Infarction of cerebrum	2.63e-06	NaN	ADRA1A,ADRA1B,ADRA2B,APOA1,APOB,ATP1A1,ATP1A2,ATP1A4,BCHE,CACNA1D,CACNA1S,CACNB2,CACNB3,F10,F2,F5,HTR2B,LPA,MUT,NOS2,P2RY1,P2RY12,PDE3A,PLG,PRKCH,PROC,PROS1,SERPINC1
Bronchopathy	2.86e-06	NaN	ABCA12,ADORA2A,ADORA2B,ADRA1A,ADRA1B,ADRA2B,AGK,AGTR1,ANKS1B,APOB,ATP8B2,BCL2,C7,CHRM2,CLDN2,CLTRN,COL21A1,CYP11A1,CYSLTR1,CYSLTR2,DDR1,DEK,DLK1,DNAH6,DSCAM,E2F5,EPCAM,FGL1,FOXA3,GJB1,HELLS,HPGD,IGF1,KIF15,LDHB,LTF,LYZ,MPP7,MYPN,NR3C1,ORC1,PCDHA13,PDE11A,PDE3A,PDE4B,PDE5A,PDE7B,PKHD1L1,PON1,SHCBP1,SHH,SLC12A2,SLC7A11,TACC3,TCHH,TES,TMEM200A,TOP2A,TTR,TYMS,VPS13B,ZNF284
Upper aerodigestive tract carcinoma	3.49e-06	NaN	A1BG,ABCA12,ABCA4,ABCA8,ABCB4,ABCC9,ACSS3,ACTN2,ADAM9,ADAMTS13,ADAMTSL3,ADCY1,AGAP2,AGT,AGTR1,AHNAK2,AJAP1,AKAP6,ALDOB,AMPH,ANKRD53,ANO5,AOX1,AQP7,ARFGEF3,ARHGAP15,ARHGAP28,ARHGAP6,ASB12,ASCL1,ASIC3,ATF7IP2,ATP1A4,ATRNL1,AURKA,AXDND1,BAAT,BAG1,BCHE,BCL2,BIRC5,BMP2,BMP4,BUB1B,C1orf116,C1RL,C3orf67,CA9,CACNA1H,CACNA1S,CALCR,CAPN8,CAV1,CCDC102B,CCDC141,CCNB1,CCND1,CCR7,CCSER1,CD247,CD48,CDCA7,CDH19,…
Homeostasis of cholesterol	3.59e-06	NaN	ABCG5,ABCG8,AKR1C1/AKR1C2,ANGPTL3,APOA1,APOA2,APOA4,APOA5,APOB,APOC3,APOE,CAV1,CD24,CETP,EPHX2,LCAT,LIPC,SOAT2
Primary hypertension	3.62e-06	NaN	ADRA1A,ADRA1B,ADRA2B,AGT,AGTR1,AR,ASIC2,ASIC3,ATP1A1,CA12,CA14,CA3,CA5A,CA9,CACNA1D,CACNA1H,CACNA1S,CACNB2,CACNB3,CAV1,CSF2RA,CYP3A5,EDN1,FHL1,GUCY1A1,HSD11B2,KCNA5,KCNJ11,KCNJ5,KCNQ1,NOS2,P2RY12,PDE11A,PDE3A,PDE5A,SCNN1A,SCNN1B,SCNN1D,SELE,SELP,SLC12A2,STK39
Formation of myofibrils	3.72e-06	NaN	ACTN2,BMP10,CAPN3,EDN1,KRT19,MYOZ1,MYPN,OBSCN,TCAP,TPM1,TTN
Serous ovarian adenocarcinoma	3.72e-06	NaN	ABCA8,ANXA8/ANXA8L1,APOE,AR,ATP8B1,AXIN2,BCL10,BCL2,BRCA1,C2orf88,CALB2,CD24,CDKN1A,CFH,CLDN3,CLDN7,CLEC3B,CLU,CMTM4,CP,DHTKD1,DIRAS3,DTNA,ELF3,ENPEP,EPCAM,EPHB6,EPPK1,ESR2,FGFR3,FLRT2,FLT3,FZD3,GATA3,GDF2,GINS1,GPX3,H2AFX,HGF,HIST1H2BD,HRAS,HSD11B1,HSP90AA1,HSP90AB1,IGFBP2,ITLN1,KLK10,KRT7,LCN2,LIFR,LOX,LRP8,LRRK2,MALAT1,MECOM,MET,MTFR2,MUC1,MYRF,NFE2L3,NTRK2,PDCD2L,PDK4,PIK3CG,PKM,POLQ,PRLR,PTG…
Homeostasis of triacylglycerol	5.27e-06	NaN	ANGPTL3,ANGPTL8,APOA1,APOA5,APOC2,APOC3,APOC4,CETP,GCKR,LIPC
Muscle tumor	5.38e-06	NaN	ABCA10,ABCA8,ACACB,ACAD11,ADAM9,ADAMTSL3,ADAP1,ADH1A,ADH1B,ADRA1A,ADRA1B,ADRA2B,AGRN,AIG1,ALDH1A1,ALDH1B1,ALDOA,AMPD1,ANGPT1,ANGPT2,ANKAR,AR,ARL4D,ARSE,ASB4,ATP6V1B1,ATRN,ATRNL1,AURKB,BCL10,BDH1,C11orf52,C1orf159,C8G,CACNA1H,CACNA1S,CALCR,CD24,CD84,CDKN1A,CEL,CFH,CHAF1B,CHRDL2,CKS2,CLCN5,COL13A1,COL21A1,CPAMD8,CPN2,CRY2,CSF2RA,CTBP2,CTNNA3,CTNND2,CYP3A7,CYP7A1,DDX58,DIAPH3,DLEC1,DNAH6,DNHD1,DPT,D…
Metabolism of mirtazapine	5.58e-06	NaN	CYP1A2,CYP2B6,CYP2C19,CYP2C8,CYP2C9,CYP2D6,CYP3A4
Benign pelvic disease	5.86e-06	NaN	ABCA8,ACKR1,ADH1B,ADRA1A,ADRA1B,ADRA2B,AIG1,ALDH1A1,ALDH1B1,ALDOA,AMY2B,ANGPT1,ANGPT2,APOBEC3B,APOE,AR,ARL4D,ARSE,ASIC3,ATP1B1,ATP2B2,ATRN,ATRNL1,AURKB,BCL10,BCL2,BDH1,BIRC5,BMP8B,BRCA1,BUB1B,BYSL,C1S,C4BPA,CADM3,CCL15,CCL16,CCL18,CCL19,CCL22,CCL28,CCNA2,CD24,CD40LG,CD48,CDK1,CEMIP,CETP,CFH,CHRDL2,CLCN5,COCH,COL18A1,CRY2,CXCR6,DKK1,DPT,DST,DUSP1,DUSP2,ECM2,EFNA4,EGR1,ELL2,ENPP1,EPPK1,ERRFI1,ESR1,…
Advanced adenocarcinoma	5.91e-06	NaN	ABCA8,AMY2B,ANXA8/ANXA8L1,AR,ATP8B1,BCL10,BCL2,BLK,C2orf88,CALB2,CD24,CD48,CFH,CMTM4,CSF2RA,CST7,CTLA4,CYP3A5,DHTKD1,DIRAS3,DPYD,DTNA,ENPEP,EPHA2,EPHB6,ESR1,ESR2,FASLG,FGFR3,FGFR4,FLRT2,FLT3,FZD3,GINS1,H2AFX,HGF,HSD11B1,HSP90AA1,HSP90AB1,ITK,ITLN1,KRT7,LCN2,LIMD2,LRP8,MALAT1,MAPK11,MET,MST1R,MTFR2,MUC1,MYRF,NR1I3,NTRK2,P2RY1,P2RY12,PDCD1,PDCD2L,PLK1,PTPRC,RASSF9,RET,RRM2,SCD,SERPING1,SLC39A4,TFPI…
Brain tumor	5.98e-06	NaN	ABAT,ABCG8,ADAMTS13,ADCY8,ADRA2B,AGAP5 (includes others),AK7,AKAP2,AKR1C1/AKR1C2,ALAD,ALDH5A1,ALPK2,ANGPT1,ANGPT2,ANK2,ANKRD20A4 (includes others),ANLN,ANO2,AOAH,AOX1,AQP7,ARHGAP15,ASPHD1,ASXL3,ATF7IP2,AXDND1,BAG1,BCL11A,BIRC5,BLK,BMF,BRCA1,C6,CA9,CACNA1D,CACNA1S,CALB2,CAND2,CBWD3/CBWD6,CCR2,CCR5,CD200R1L,CENPF,CFI,CHI3L1,CHRFAM7A,CKM,CLDN16,CLEC17A,CNDP1,CNKSR1,CNKSR2,COCH,COL14A1,COL18A1,CPED1,…
Central nervous system cancer	6.16e-06	NaN	ABAT,ABCA8,ABCG2,ACTN4,ADGRB1,ADGRB3,AGAP2,ALAD,ALDH1A1,ALDH2,ALDH5A1,ANGPT1,ANGPT2,ANKRD20A4 (includes others),ASB2,ASPA,ATP1B1,AXIN2,BIRC5,BLK,BRCA1,CALB2,CAPN3,CAV1,CCL19,CCND1,CD200,CD3E,CD48,CD79A,CD79B,CDK3,CDKN1A,CDKN2B,CDKN3,CHI3L1,CKM,CKS2,CLCN4,CLEC2D,CLU,COCH,COL27A1,CSF2,CSF2RA,CTBP2,CTLA4,CXCL1,CXCR6,DBH,DDR1,DES,DMBT1,DPT,DTNA,ECT2,ELMO1,ENPP2,EPCAM,EPHA2,EPHB2,EPHB6,EPPK1,ESR1,ESR2…
Thrombosis of vein	6.34e-06	NaN	ABO,ANGPT1,ANGPT2,F10,F13B,F2,F3,F5,FGA,GGCX,HABP2,IL6,MMP7,PDE11A,PDE3A,PDE4B,PDE5A,PDE7B,PLG,PROS1,SERPINA10,SERPINC1,STMN2,TFPI,THBS1
Renal impairment	6.57e-06	NaN	ADORA2A,ADRA1A,ADRA1B,ADRA2B,AGT,AGTR1,AMY2B,APOB,AR,C3,C5,CA12,CA14,CA3,CA5A,CA9,CACNA1D,CACNA1S,CACNB2,CASR,CDKN1A,CHRNA1,CHRNA4,CYP2B6,CYP2D6,EDN1,F10,F2,FABP1,FCGR1B,GABRA5,GABRB3,GABRE,GABRG3,GHR,GSTP1,GUCY1A1,IL18,IL6,IMPDH1,IMPDH2,KCNQ1,KNG1,LCN2,MR1,MST1,NR3C1,P2RY1,P2RY12,PDE11A,PDE3A,PDE4B,PDE5A,PDE7B,PRKCB,PTGDS,SERPINC1,SLC7A11,SSTR2,STMN1,TF,TFPI,TNNT2,TOP2A,TRPV1,TTR,WT1
Disorder of basal ganglia	7.23e-06	NaN	A2M,ACAT1,ACTN2,ACTN3,ADH1C,ADORA2A,ADORA2B,ADRA1A,ADRA1B,ADRA2B,AFM,AIG1,AIMP2,ALDH2,ALDH6A1,ANXA2,APBB1,APOA4,APOE,AQP4,ASCL1,ATP1B1,ATP2A1,ATP2B2,BBOX1,BCHE,BCL11B,BCL2,C19orf12,C2orf40,C3,C7,C9,CA12,CACNA1D,CACNA2D3,CAPN3,CASQ1,CCL5,CD38,CD48,CDS1,CHAF1B,CHI3L1,CHRM2,CHRNA4,CLU,COCH,COLGALT2,CP,CPNE5,CREB3L1,CTNNA3,CYP2D6,DAAM2,DDC,DGKB,DLG2,DNAJC6,DTNA,E2F1,ELMO1,ENO2,ENO3,EPHB2,EPHX2,ETNPPL…
Chronic autoimmune hepatitis	7.51e-06	NaN	IMPDH1,IMPDH2,NOS2,NR3C1,PPAT,PTPRC,RORC,SLC10A1
Metabolism of tolbutamide	7.51e-06	NaN	CYP1A1,CYP1A2,CYP2C19,CYP2C8,CYP2C9,CYP2D6,CYP2E1,CYP3A5
Arrest in mitosis	7.66e-06	NaN	ACSM5,ADGRL2,AURKB,BIRC5,BUB1,BUB1B,CCNB1,CCNB2,CCNE1,CDKN1A,CENPE,CENPI,CHEK1,ITGB1BP2,KIF11,KIF4A,MAD2L1,MAP3K12,NDC80,NUF2,PLG,PLK1,PLK4,RACGAP1,SGO1,SPAG5,SPC25,TPX2,TTK,UBE2S,ZWINT
Tetramerization of protein	7.72e-06	NaN	AASS,ACACB,ACTN2,ALDH5A1,ANXA2,CAT,CCL5,CD247,CD79A,CRYZ,CTH,DCXR,FBP1,GNMT,GPX3,HIST1H3A,HIST1H3B,HIST1H3C,HIST1H3D,HIST1H3H,HIST1H3I,HIST1H3J,HIST1H4F,HIST1H4L,HIST2H4A,HIST2H4B,HMGCL,MAT1A,RCC1,S100A10,SHMT1,TDO2,TK1,TP63,TRPA1
Papillary adenocarcinoma	7.73e-06	NaN	ABCA8,ANXA8/ANXA8L1,AREG,ASIP,ATP1B1,ATP8B1,BCL10,BCL2,BMP6,C2orf88,C3orf52,CALB2,CCL17,CD24,CD48,CDKN1A,CES2,CFH,CLU,CMTM4,COCH,CR1,CST1,CST7,CUBN,DHTKD1,DIRAS3,DTNA,DUOX1,ENPEP,EPHB6,F3,FCGBP,FGFR3,FGFR4,FLRT2,FLT3,FRMD4B,FZD3,GINS1,GPER1,H2AFX,HGF,HRAS,HSD11B1,HSP90AA1,HSP90AB1,ITK,ITLN1,KRT19,KRT7,LCN2,LDLRAD3,LIMD2,LOX,LRP8,LRRK2,MET,MLLT3,MPC1,MTFR2,MYBPC2,MYRF,NRG1,NTRK2,NUDT10,PDCD2L,PDK4…
Intercellular communication	7.85e-06	NaN	ADGRG1,ADORA2A,ADRA1A,ADRA1B,ADRA2B,AGT,AR,ASIP,BMP2,C1QA,CCL15,CCL16,CCL17,CCL18,CCL20,CCL22,CCL27,CD70,CXCL11,EDN1,EFNA3,EFNA4,EFNB1,ESR2,FASLG,FAT1,FGF13,FGF14,FGF16,GDF15,GJB1,GNRH1,GRAP2,GUCA1B,IL18,IL26,INSL3,LTA,NMB,NTF3,PHEX,SEMA3B,SH2D1A,SIRPG,SRD5A2,SSTR2,STAB1,TFAP2C,TNFRSF11A,TNFSF18,TNFSF8,TNFSF9,TSHR,TSPAN32
Neuroendocrine tumor	9.3e-06	NaN	A2M,ABCC9,ACTN4,ADRA1A,ADRA1B,ADRA2B,AFF3,AGTR1,AKAP6,AKR1B1,AMPH,ARHGEF6,ATP13A4,BCL11A,BCL2,BEND4,BLK,BTNL8,C3orf67,CABLES1,CACNA1S,CCDC9B,CCND1,CCNE2,CD48,CD70,CD79B,CDH23,CFH,CHDH,CKB,CLU,CNKSR2,COCH,COL18A1,COLEC11,CPN1,CREBRF,CST7,CTLA4,CUZD1,CYP3A4,CYP46A1,CYP4F11,CYP4F2,DAPK1,DKC1,DNAH11,DST,ECHDC3,EML6,ENO2,EPAS1,EPCAM,ERICH3,ESR1,ESR2,F7,FAM78A,FAT1,FBLN5,FERMT1,FLT3,FYB1,GDNF,GHRL,GPER…
Papillary carcinoma	9.83e-06	NaN	ABCA8,ANXA8/ANXA8L1,AREG,ASIP,ATP1B1,ATP8B1,BCL10,BCL2,BMP6,C2orf88,C3orf52,CALB2,CCL17,CD24,CD48,CDKN1A,CES2,CFH,CLU,CMTM4,COCH,CR1,CST1,CST7,CUBN,DHTKD1,DIRAS3,DTNA,DUOX1,ENPEP,EPHB6,F3,FCGBP,FGFR3,FGFR4,FLRT2,FLT3,FRMD4B,FZD3,GINS1,GPER1,H2AFX,HGF,HRAS,HSD11B1,HSP90AA1,HSP90AB1,ITK,ITLN1,KRT19,KRT7,LCN2,LDLRAD3,LIMD2,LOX,LRP8,LRRK2,MET,MLLT3,MPC1,MTFR2,MYBPC2,MYRF,NOS2,NRG1,NTRK2,NUDT10,PDCD2L…
Myocardial infarction	9.85e-06	NaN	ADORA2A,ADORA2B,ADRA1A,ADRA1B,ADRA2B,AGT,APOA1,APOE,AR,C3,C5,CACNA1D,CACNA1S,CACNB2,CD40LG,CD55,CLU,CXCL12,CYP2C19,CYP2C8,CYP2C9,EDN1,ESR1,F10,F13A1,F2,F7,FCGR1B,GUCY1A1,HGF,IL6,IL6R,IL6ST,ITGA2B,ITGAL,KCNA5,KCNJ5,LGALS2,LPA,LRP8,LTA,MB,NGF,NPC1L1,OXT,P2RY1,P2RY12,PLG,PON1,PTGER1,SELP,SERPINC1,SERPINF2,TNNT2,TUBA1C,TUBB1,TUBB4B,TUBG1
Crohn disease	1e-05	NaN	ACSL1,ADORA2A,ADORA2B,AGER,AGTR1,AMT,ATP1B1,BSN,C19orf57,C1orf106,C3orf52,CAMP,CKB,CKM,CKMT1A/CKMT1B,CSF2RA,CYP11A1,DMBT1,EDN1,FMO5,FOXP3,FRMD4B,FRRS1,GABRA5,GABRB3,GABRE,GABRG3,GABRR2,GHR,GIPR,GRIN2D,GRIN3A,GRM8,HLA-DQA2,HPGD,IDO1,IGF1,IL18,IL6,IMPDH1,INSL3,ITGA4,ITGB6,KCNAB3,LBP,LDB2,LEPR,LGALS4,LTF,MPC1,MSMO1,MYBPC2,NEGR1,NICN1,NKD1,NR3C1,NR5A2,NTRK2,PDE4B,PIK3C2G,PKM,PLG,POMC,PPAT,PPP2R2B,PRO…
Cholangiocarcinoma	1.01e-05	NaN	A1BG,ABCB11,ADH1B,ADH1C,ADRA2B,AFP,AMBP,ANXA2,C1S,CDH2,EPCAM,FGA,FGF2,FGFR3,GABRA5,GABRB3,GABRE,GABRG3,GABRR2,GC,HPD,HPX,HSP90AA1,HSP90AB1,KNG1,KRT19,KRT7,PKM,RRM2,SERPINA6,SERPINC1,TYMS,UGT1A4,UGT1A6,UGT1A7 (includes others)
Bronchitis	1.02e-05	NaN	ADORA2A,ADORA2B,ADRA1A,ADRA1B,ADRA2B,AGTR1,BCL2,CHRM2,CYSLTR1,CYSLTR2,IGF1,LTF,LYZ,NR3C1,PDE11A,PDE3A,PDE4B,PDE5A,PDE7B,SLC7A11,TOP2A,TYMS
Hydronephrosis	1.08e-05	NaN	ADRA1A,ADRA1B,CCL19,CD70,CNTFR,FGF13,GFRA1,HGF,IGF1,ITGA9,ITGB4,LEP,MMP7,NTF3,PTN,SFRP2,SFRP5
Urinary tract cancer	1.11e-05	NaN	ABCA6,ABHD11,ACACB,ACAT1,ACOT1,ACOT12,ACR,ACSS3,ADAM28,ADAMTS10,ADAMTSL4,ADH1A,ADORA2A,ADORA2B,AFF3,AGER,AGXT,AGXT2,AKAP2,ALAD,ALAS2,ALDH5A1,ALPK2,AMBP,ANK2,ANKRD44,ANLN,ANO5,ANPEP,ANXA2,APBA1,APOBEC3B,AQP7,AQP9,AR,ARFGEF3,ARHGAP39,ARMC12,ASAP3,ASIP,ATAD3A,ATP1A2,ATP1B1,ATP2A1,AURKA,AURKB,AXIN2,BAG1,BCL2,BIRC5,BMP6,BRCA1,BUB1B,C19orf33,C19orf57,C1S,C3orf52,C3orf67,CA9,CANT1,CARD11,CAV1,CCND1,CCR5…
Ischemia of heart	1.11e-05	NaN	AGTR1,AMY2B,AR,CACNA1D,CACNA1S,CACNB2,CACNB3,ESR1,ESR2,F10,F2,GABRA5,GUCY1A1,IL6,ITGA2B,KCNA5,MB,NNMT,OXT,P2RY1,P2RY12,PDE11A,PDE3A,PDE4B,PDE5A,PDE7B,PLG,QPRT,SERPINC1,TFPI,TNNC2,TNNT2
Graft rejection	1.15e-05	NaN	ADORA2A,ADORA2B,AGTR1,C1R,C1S,C5,CASR,CD48,CYP3A5,CYSLTR1,CYSLTR2,DEFB1,GABRA5,GABRB3,GABRE,GABRG3,GABRR2,GRIN2D,GRIN3A,IMPDH1,IMPDH2,MR1,MS4A1,NR3C1,PDE4B,PPAT,SERPINA3,SERPING1,SIGMAR1
Ovarian serous tumor	1.17e-05	NaN	ABCA8,ABCC11,ADAMTSL3,ADORA2A,AKAP2,ANGPT1,ANKRD24,ANXA8/ANXA8L1,APCDD1,APOE,AR,ATG2B,ATP8B1,ATP8B2,AXIN2,BCL10,BCL2,BRCA1,BSN,C2orf88,C8B,CALB2,CD24,CDKN1A,CFH,CHEK1,CLDN3,CLDN7,CLEC17A,CLEC3B,CLU,CMTM4,CORIN,CP,CPB2,CREB5,CYP21A2,CYP4A11,DCLK1,DHTKD1,DIRAS3,DNAJA1,DTNA,EFNB1,ELF3,ENPEP,EPCAM,EPHB6,EPPK1,ESR2,F2,FAM69A,FARP1,FAT4,FBL,FGFR3,FLRT2,FLT3,FMO4,FOXM1,FZD3,GATA3,GDF2,GINS1,GLDC,GPX3,GT…
Metabolism of alpha-amino acid	1.18e-05	NaN	AADAT,ALDH18A1,AMT,ASPA,BAAT,CBS/CBSL,CDO1,CTH,DAO,GLDC,GLYAT,HDC,IDO1,MAT1A,MTHFS,NAGS,PKM,SDS,SHMT1,TAT,UROC1
T-cell non-Hodgkin disease	1.3e-05	NaN	ANGPT2,AURKA,B3GAT1,BCL10,BCL2,BIRC5,C1R,C3,CARD11,CCL18,CCL19,CCL20,CCL22,CCND1,CCR4,CCR7,CD19,CD2,CD200,CD24,CD27,CD28,CD3E,CD40LG,CD52,CD69,CD7,CDH3,CDO1,CLEC4G,CLU,COL27A1,CR2,CTAGE1,CXCL11,CXCL12,DTX1,DUSP2,EBI3,EPAS1,EPHA2,FYN,GATA3,GHR,GP1BA,HDAC11,HDAC9,HLA-DOA,HLA-DPB1,HLA-DRA,HS3ST1,HSP90AA1,HSP90AB1,IDO1,IFI6,IFIT3,IFITM1,IGFL2,IKZF1,IL13RA2,IL16,IL6,IL6R,IMPDH1,IMPDH2,IRF4,ISG15,ITGA9…
Philadelphia chromosome negative leukemia	1.52e-05	NaN	ADORA2A,BCL2,CACNA1D,CACNA1S,CACNB2,CACNB3,CD19,CD247,CD3D,CD3E,CD3G,IKZF1,IMPDH1,IMPDH2,MS4A1,NR3C1,PAX5,PPAT,RRM2,SETBP1,TOP2A,TUBA1C,TUBB1,TUBB4B,TUBG1,TYMS
Angioimmunoblastic T-cell lymphoma	1.52e-05	NaN	ANGPT2,BCL10,C1R,C3,CARD11,CCL19,CCL20,CCL22,CD200,CD24,CD27,CD28,CD40LG,CD52,CDH3,CLEC4G,CLU,COL27A1,CR2,EPAS1,EPHA2,FYN,GP1BA,HDAC11,HDAC9,HLA-DPB1,HS3ST1,HSP90AA1,HSP90AB1,ITM2C,JAK3,L1CAM,LAD1,LAMC2,LIF,LIFR,MMP1,MMP12,MS4A1,NFATC1,NR3C1,PDCD1,PIK3R5,RRM2,SELP,SERPINF1,TCF3,TOP2A,TUBA1C,TUBB1,TUBB4B,TUBG1,TYMS,VAV2,VCAM1,VTN
Familial dilated cardiomyopathy	1.57e-05	NaN	ABCC9,ACTN2,ANKRD1,CSRP3,DES,DMD,DSC2,DSG2,FLNC,LDB3,LMNA,MYH7,MYL2,MYL3,MYOM1,MYPN,NEBL,PKP2,SGCD,SYNE1,TCAP,TNNT2,TPM1,TTN
Post-transplant lymphoproliferative disorder	1.57e-05	NaN	B3GAT1,BCL2,CD19,CD52,CD7,CD79A,FOXP3,IL6,IRF4,MKI67,MS4A1,MYC,NCAM1,NR3C1,PAX5,PRMT5,PTPRC,RRM2,TNFRSF8,TOP2A,TUBA1C,TUBB1,TUBB4B,TUBG1
Movement Disorders	1.66e-05	NaN	A2M,ACAT1,ACTN2,ACTN3,ADH1C,ADORA2A,ADORA2B,ADRA1A,ADRA1B,ADRA2B,AFM,AIG1,AIMP2,ALAS2,ALDH2,ALDH6A1,AMY2B,ANXA2,APBB1,APOA4,APOE,AQP4,AR,ASCL1,ATP1B1,ATP2A1,ATP2B2,BBOX1,BCHE,BCL11B,BCL2,C2orf40,C3,C7,C9,CA12,CA14,CA3,CA5A,CA8,CA9,CACNA1D,CACNA1H,CACNA2D3,CAPN3,CASQ1,CCL5,CD38,CD48,CDS1,CHAF1B,CHI3L1,CHRM2,CHRNA1,CHRNA4,CLU,CNTFR,COCH,COLGALT2,CP,CPNE5,CREB3L1,CTNNA3,CYP2D6,DAAM2,DDC,DGKB,DLG2,DN…
Depressive disorder	1.75e-05	NaN	A2M,ABAT,ADRA1A,ADRA1B,ADRA2B,AGTR1,ALDH5A1,AMBP,APOE,AQP4,AR,ATP1A1,ATP1A2,ATP1A4,BCHE,BTD,CA12,CA14,CA3,CA5A,CA9,CACNA1D,CACNA1S,CACNA2D3,CACNB2,CD3E,CHRM2,CHRNA1,CHRNA4,CNKSR1,CPLX1,CYP1A1,CYP3A4,DIP2C,DLG3,EPHX2,ESR1,ESR2,FKBP4,GABRA5,GABRB3,GABRE,GABRG3,GABRR2,GATM,GDNF,GFRA1,GRIA3,GRIN2D,GRIN3A,GRM5,HSD17B6,HTR2B,IGF1,IGFBP2,ITIH4,KCNH2,KRT17,LMNB2,LRP4,MAOB,MYOM1,NCAM1,NR3C1,NRG1,OPRL1,OXT…
Catabolism of amino acids	1.81e-05	NaN	ACAT1,ALDH5A1,ALDH6A1,AMT,ARG1,ASPA,CBS/CBSL,DAO,GLDC,HDC,HMGCL,MAT1A,NOS2,SDS,SHMT1,TAT,UROC1
Lupus erythematosus	1.83e-05	NaN	AGER,APOH,AR,BLK,C1QB,C1R,C1S,C2,C3,C3orf67,CAMP,CCL3L1,CD1C,CD22,CD247,CFB,CHRM2,CLU,CR1,CR2,CTLA4,CTSG,DNASE1L3,E2F2,ESR1,ESR2,GATA3,GZMA,HLA-DRA,ICA1,ICOS,IDO1,IL18,IL6,IL6ST,IMPDH1,IMPDH2,ISG15,JAG1,KLRB1,LCN2,LILRA4,LTF,LY9,MPO,MS4A1,MX1,NCR1,NCR3,NMNAT2,NOS2,NR3C1,PDCD1,PPAT,PTPN22,RORC,S100A8,SELL,SELP,SERPINC1,SLAMF6,SLAMF7,STAT4,TLR7,TLR8,TNK1,TNXB,TYMS,VCAM1,XKR6,ZNF214
Congenital deafness	2.05e-05	NaN	ADCY1,ATP2B2,CACNA1D,CDH23,CLDN14,CLIC5,ESPN,GJB1,GPSM2,HGF,ILDR1,KCNJ10,KCNQ1,MAF,MYO15A,MYO7A,RIPOR2,TECTA,TPRN,USH1C
Plaque psoriasis	2.12e-05	NaN	ABCG2,CCL20,CCND1,CCR2,CD2,CD24,CSF2,CSTA,CXCL11,CYP2E1,CYP3A5,DKK2,FABP5,FGF21,GAPDH,GATA3,GSTP1,IL18,ITGA2,ITGA3,ITGA6,ITGAL,ITGB4,JAK3,KRT17,KRT18,KRT6B,LCN2,LDB2,LTA,MUC5B,MUT,NOS2,NR3C1,ODC1,PCNA,PDE4B,PDZK1IP1,PRF1,RARG,RCAN2,S100A8,SFN,TGFA,VEGFD,WNT7B
Failure of kidney	2.22e-05	NaN	ADORA2A,ADRA1A,ADRA1B,ADRA2B,AGT,AGTR1,AMY2B,APOB,AR,C3,C5,CACNA1D,CACNA1S,CACNB2,CASR,CDKN1A,CHRNA1,CHRNA4,CYP2B6,CYP2D6,EDN1,F10,F2,FABP1,FCGR1B,GABRA5,GABRB3,GABRE,GABRG3,GHR,GSTP1,GUCY1A1,IL6,IMPDH1,IMPDH2,KNG1,LCN2,MR1,MST1,NR3C1,P2RY1,P2RY12,PDE11A,PDE3A,PDE4B,PDE5A,PDE7B,PRKCB,PTGDS,SERPINC1,SLC7A11,SSTR2,STMN1,TFPI,TNNT2,TOP2A,TRPV1,TTR,WT1
Sickle cell anemia	2.23e-05	NaN	ADORA2A,ATP1B1,C3orf52,CCL17,CD52,EDN1,F3,FRMD4B,GIPR,GPER1,GRIN2D,GRIN3A,IL6,IMPDH1,INSL3,KCNN3,KCNN4,MPC1,MPO,MR1,NTRK2,P2RY12,PDE5A,PLCG2,RET,RRM2,SELE,SELL,SELP,SERINC2,SIGMAR1,SLC7A11,SNCAIP,TARP,TF,VCAM1
Dyslipidemia	2.26e-05	NaN	ADRA1A,ADRA1B,AGTR1,APOA1,APOA5,APOB,APOC2,APOC3,APOE,CACNA1D,CACNA1S,CACNB2,CETP,CREB3L3,FABP4,FRMD4B,GPD1,IMPDH1,IMPDH2,LCAT,LEP,LIPC,LMF1,LPA,NNMT,NPC1L1,NR3C1,PON1,QPRT,TRPV1
Organization of sarcomere	2.3e-05	NaN	ACTN2,BMP10,EDN1,KRT19,MYPN,OBSCN,TCAP,TPM1,TTN
Acute lymphocytic leukemia	2.39e-05	NaN	ABCA10,ACTG1,ADORA2A,ANPEP,ATP1B1,BCL10,BCL11B,BCL2,CACNA1D,CACNA1S,CACNB2,CACNB3,CD19,CD2,CD22,CD247,CD3D,CD3E,CD3G,CD48,CD52,CD7,CD79A,CDKN1A,CDKN2B,COCH,CRLF2,CYP1A1,CYP3A5,DAB1,DDC,DDR1,DGKB,EBF1,ELMO1,EPHA2,F10,F2,F3,FAT1,FBXL2,FGL1,FLT3,FYN,GADD45G,GATA3,GHR,H2AFX,HSP90AA1,HSP90AB1,HSPB1,IKZF1,IKZF2,IL7R,IMPDH1,IMPDH2,INCA1,JAK3,MGMT,MKI67,MR1,MS4A1,MYB,MYC,NQO1,NR3C1,PAX5,PCNA,PDE11A,PDE3A…
Head and neck squamous cell carcinoma	2.42e-05	NaN	A1BG,ABCA12,ABCB4,ABCC9,ABI3,ABO,ACAD11,ACADL,ACOXL,ACTN2,ADAM9,ADAMTS13,ADAMTSL3,ADCY1,ADCY8,AFF3,AGAP2,AGAP5 (includes others),AGT,AGTR1,AHNAK2,AKAP6,AKNA,ALDOB,AMPH,ANKRD20A4 (includes others),ANKRD35,ANKRD53,ANLN,ANO5,AQP7,AR,ARHGAP15,ARHGAP28,ARHGAP6,ASAP3,ASB12,ASPHD1,ATF7IP2,ATP1A4,ATRNL1,AURKA,AXDND1,AXIN2,BAAT,BACH2,BAG1,BCL10,BCL11B,BCL2,BIRC5,BMP2,BMP4,BRCA1,BSN,C11orf21,C16orf54,C19or…
Abnormality of heart ventricle	2.65e-05	NaN	ABCC9,ADRA1A,ADRA1B,ADRA2B,AGTR1,ANK2,CACNA1D,CACNA1S,CACNB2,CKM,CTNNA3,DES,DMD,DSC2,DSG2,DTNA,F10,FHL2,FOXM1,GABRA5,GABRB3,GABRE,GABRG3,KLF15,LDB3,LMNA,MMP1,MYH7,MYL3,MYOM1,NRG1,PDE3A,PDE4B,PDE5A,PDE7B,PKP2,S100A1,SELE,SERPINC1,SOX9,TNNT2,TPM1,TTN,VCAM1,WNT3
Cirrhosis of liver	2.68e-05	NaN	ABCB11,ABCB4,ABCG2,ABCG5,ALPL,APOA1,APOA2,APOB,ATP1B1,CCL28,CCR7,CD40LG,CD48,CHRM2,COCH,CSF2RA,CTLA4,CYP3A4,CYP3A43,CYP3A5,CYP3A7,CYP7B1,DLK1,EPCAM,FASLG,FGFR3,FLT3,FST,GPER1,GRIN2D,GRIN3A,HGF,HLA-DPB1,HLA-DQB1,HLA-DRA,IL12RB2,IL6,IL7R,IMPDH1,IMPDH2,ITGA6,JAG1,KRT18,KRT8,LDLRAD3,LEP,MPC1,MTTP,NCR1,NCR3,NOS2,NQO1,NR1H4,NR3C1,NR4A1,PAH,PNPLA3,RET,SERINC2,SERPINA1,SERPINA5,SERPINC1,SLC30A10,TARP,TGF…
Autosomal dominant kidney disease	2.76e-05	NaN	ACTN4,ADGRL3,ADH1B,AGT,AGTR1,ANGPT1,ANGPT2,C1S,C3,CD2,CFB,CFI,COL14A1,CYP21A2,F2RL1,FGF13,FHL1,FST,FXYD2,FYB1,H19,HEPH,HTR2B,KLHL3,KRT19,LOX,MATN2,MEIS2,MELK,MUC1,NAPSA,OLFM1,PIGR,PLA2G2A,POU6F2,PPP1R3C,PTPRC,RARRES2,SAA4,SLC2A9,SSTR2,VLDLR,WT1
Pancreatic carcinoma	2.76e-05	NaN	ABCA12,ABCA9,ABCB11,ABCB4,ABCC9,ABCG2,ABO,ACACB,ACAP1,ACOXL,ACSM5,ACSS3,ACTN2,ADAM33,ADAM9,ADAMTS10,ADAMTS13,ADAMTS17,ADAMTSL3,ADAP1,ADCY1,ADCY8,ADH4,ADRA1A,AFAP1L2,AFF3,AGAP2,AGBL2,AGT,AGXT2,AHNAK2,AJAP1,ALDOA,ALPK2,ALPL,AMHR2,AMPD1,AMPH,ANGPT1,ANK2,ANKDD1A,ANKRD24,ANKRD29,ANKRD6,ANPEP,APOC4,AQP4,AR,AREG,ARHGAP22,ARHGAP39,ARHGEF6,ARMC12,ARSE,ASB12,ASXL3,ATG16L2,ATP1A2,ATP2B2,ATP8B2,ATRNL1,AXDND1…
Bile duct adenocarcinoma	2.83e-05	NaN	A1BG,ABCB11,ADH1B,ADH1C,ADRA2B,AFP,AMBP,ANXA2,C1S,CDH2,EPCAM,FGA,FGF2,FGFR3,GABRA5,GABRB3,GABRE,GABRG3,GABRR2,GC,HPD,HPX,HSP90AA1,HSP90AB1,KNG1,KRT19,KRT7,MET,PKM,RRM2,SERPINA6,SERPINC1,TYMS,UGT1A4,UGT1A6,UGT1A7 (includes others)
Intraepithelial neoplasia	2.87e-05	NaN	AGER,AGTR1,ANXA2,APOA2,APOB,ARHGAP28,ATP8B1,AURKA,AURKB,BCL2,C1orf54,C1R,C3,CCND1,CDH2,CDH23,CDH3,CFB,CFH,CFHR4,CFI,CKAP2L,CMKLR1,CNTN3,COL18A1,CR2,DNAH6,DUOX1,EFCAB6,ENTPD5,ESR1,ESR2,FAM189B,FBXL13,FHL2,GATA3,GPRC5A,GPX2,GPX3,GRM5,HSD17B13,HSD17B6,IER3,ITGA6,ITGB4,KRT7,LAMC2,LDHD,LGR5,LTF,MKI67,MMP7,MUC1,MYO1F,MYO5B,MYO5C,NCOA7,OAS3,ORM1,POLR1E,POLR3G,PPFIBP2,PRC1,PROM1,PTGDS,RCAN2,S100A8,SERPIN…
Glandular intraepithelial neoplasm	2.91e-05	NaN	AGER,AGTR1,ANXA2,APOA2,APOB,ARHGAP28,ATP8B1,AURKA,AURKB,BCL2,C1orf54,C1R,C3,CCND1,CDH2,CDH23,CDH3,CFB,CFH,CFHR4,CFI,CKAP2L,CMKLR1,CNTN3,COL18A1,CR2,DNAH6,DUOX1,EFCAB6,ENTPD5,ESR1,ESR2,FAM189B,FBXL13,FHL2,GATA3,GPRC5A,GPX2,GPX3,GRM5,HSD17B13,HSD17B6,IER3,ITGA6,ITGB4,KRT7,LAMC2,LDHD,LGR5,LTF,MKI67,MMP7,MUC1,MYO1F,MYO5B,MYO5C,NCOA7,ORM1,POLR1E,POLR3G,PPFIBP2,PRC1,PROM1,PTGDS,RCAN2,S100A8,SERPING1,SF…
Advanced stage carcinoma	2.95e-05	NaN	ABCA8,AMY2B,ANXA8/ANXA8L1,AR,ATP8B1,BCL10,BCL2,BLK,BRCA1,C2orf88,CALB2,CCR2,CD24,CD48,CDKN3,CFH,CMTM4,CSF2RA,CST7,CTLA4,CYP3A4,CYP3A5,DHTKD1,DIRAS3,DPYD,DTNA,ENPEP,EPHA2,EPHB6,ESR1,ESR2,FASLG,FGFR3,FGFR4,FGG,FLRT2,FLT3,FZD3,GINS1,GNRH1,GSTP1,H2AFX,HGF,HSD11B1,HSP90AA1,HSP90AB1,IDO1,ITK,ITLN1,KCNMA1,KLF8,KLK10,KRT7,LCN2,LIMD2,LRP8,MALAT1,MAPK11,MET,MST1R,MTFR2,MUC1,MYRF,NR1I3,NR3C1,NTRK2,P2RY1,P2R…
Exanthem of skin	2.95e-05	NaN	ABCG2,ADCY10,CCL20,CCND1,CCR2,CD2,CD24,CSF2,CSTA,CTLA4,CXCL11,CYP2E1,CYP3A5,DKK2,FABP5,FGF21,GAPDH,GATA3,GSTP1,IL18,ITGA2,ITGA3,ITGA6,ITGAL,ITGB4,JAK3,KRT17,KRT18,KRT6B,LCN2,LDB2,LTA,MUC5B,MUT,NOS2,NR3C1,ODC1,PCNA,PDE4B,PDZK1IP1,PRF1,RARG,RCAN2,S100A8,SFN,TGFA,VEGFD,WNT7B
Head and neck neoplasia	3.05e-05	NaN	A1BG,ABAT,ABCA12,ABCA5,ABCA6,ABCB4,ABCC9,ABCG8,ABI3,ABO,ACAD11,ACADL,ACOT1,ACOXL,ACTN2,ADAM28,ADAM9,ADAMTS10,ADAMTS13,ADAMTS17,ADAMTSL2,ADAMTSL3,ADCY1,ADCY10,ADCY8,ADRA2B,AFF3,AGAP2,AGAP5 (includes others),AGT,AGTR1,AGXT,AHNAK2,AIFM3,AK7,AKAP2,AKAP6,AKNA,AKR1B1,AKR1C1/AKR1C2,ALAD,ALDH5A1,ALDOB,ALOX15,ALPK2,ALYREF,AMPD1,AMPH,ANGPT1,ANGPT2,ANGPTL6,ANK2,ANKRD20A4 (includes others),ANKRD35,ANKRD53,AN…
Metabolism of dapsone	3.14e-05	NaN	CYP2C18,CYP2C19,CYP2C8,CYP2C9,CYP2E1,CYP3A4
Metabolism of meperidine	3.14e-05	NaN	CYP2B6,CYP2C18,CYP2C19,CYP2D6,CYP3A4,CYP3A5
Compensated cirrhosis	3.16e-05	NaN	APOA1,APOA2,CYP3A4,CYP3A43,CYP3A5,CYP3A7,IMPDH1,IMPDH2
Dengue hemorrhagic fever	3.2e-05	NaN	C3,C5,F10,F12,F2,F3,F5,F7,F8,F9,FGA,IL6,PF4,PROC,PROS1,SERPINC1
